# Supplementary material
Source: publisher figshare collection journal article supplement (https://springernature.figshare.com/ndownloader/files/17562839)
Supplement: Supplementary file 1 [file 17562839]

Archive with 50 entries (50 files):
- CytoscapeSession-2018_09_26-18_42/3.0.0.version
- CytoscapeSession-2018_09_26-18_42/networks/484-Network+of+Metabolic+Flexibility+%2D+Colour+Coded+by+Pathways.xgmml
- CytoscapeSession-2018_09_26-18_42/networks/654-Expression+%2D+Umbilical+Vein+Endothelial+Cells.xgmml
- CytoscapeSession-2018_09_26-18_42/views/500-1049-Network+of+Metabolic+Flexibility+%2D+Colour+Coded+by+Pathways.xgmml
- CytoscapeSession-2018_09_26-18_42/views/670-1341-Expression+%2D+Umbilical+Vein+Endothelial+Cells.xgmml
- CytoscapeSession-2018_09_26-18_42/tables/654-Expression+%2D+Umbilical+Vein+Endothelial+Cells/HIDDEN-org.cytoscape.model.CyNetwork-654+hidden+network.cytable
- CytoscapeSession-2018_09_26-18_42/tables/500-Network+of+Metabolic+Flexibility+%2D+Colour+Coded+by+Pathways/HIDDEN-org.cytoscape.model.CyNode-500+hidden+node.cytable
- CytoscapeSession-2018_09_26-18_42/tables/484-Network+of+Metabolic+Flexibility+%2D+Colour+Coded+by+Pathways/SHARED_ATTRS-org.cytoscape.model.CyNode-Network+of+Metabolic+Flexibility+%2D+Colour+Coded+by+Pathways+root+shared++node.cytable
- CytoscapeSession-2018_09_26-18_42/tables/654-Expression+%2D+Umbilical+Vein+Endothelial+Cells/LOCAL_ATTRS-org.cytoscape.model.CyEdge-Expression+%2D+Umbilical+Vein+Endothelial+Cells+root+default++edge.cytable
- CytoscapeSession-2018_09_26-18_42/tables/670-Expression+%2D+Umbilical+Vein+Endothelial+Cells/LOCAL_ATTRS-org.cytoscape.model.CyNetwork-Expression+%2D+Umbilical+Vein+Endothelial+Cells+default++network.cytable
- CytoscapeSession-2018_09_26-18_42/tables/500-Network+of+Metabolic+Flexibility+%2D+Colour+Coded+by+Pathways/LOCAL_ATTRS-org.cytoscape.model.CyNetwork-Network+of+Metabolic+Flexibility+%2D+Colour+Coded+by+Pathways+default++network.cytable
- CytoscapeSession-2018_09_26-18_42/tables/484-Network+of+Metabolic+Flexibility+%2D+Colour+Coded+by+Pathways/LOCAL_ATTRS-org.cytoscape.model.CyNetwork-Network+of+Metabolic+Flexibility+%2D+Colour+Coded+by+Pathways+root+default++network.cytable
- CytoscapeSession-2018_09_26-18_42/tables/670-Expression+%2D+Umbilical+Vein+Endothelial+Cells/HIDDEN-org.cytoscape.model.CyNetwork-670+hidden+network.cytable
- CytoscapeSession-2018_09_26-18_42/tables/670-Expression+%2D+Umbilical+Vein+Endothelial+Cells/LOCAL_ATTRS-org.cytoscape.model.CyNode-Expression+%2D+Umbilical+Vein+Endothelial+Cells+default++node.cytable
- CytoscapeSession-2018_09_26-18_42/tables/654-Expression+%2D+Umbilical+Vein+Endothelial+Cells/LOCAL_ATTRS-org.cytoscape.model.CyNetwork-Expression+%2D+Umbilical+Vein+Endothelial+Cells+root+default++network.cytable
- CytoscapeSession-2018_09_26-18_42/tables/484-Network+of+Metabolic+Flexibility+%2D+Colour+Coded+by+Pathways/HIDDEN-org.cytoscape.model.CyNetwork-484+hidden+network.cytable
- CytoscapeSession-2018_09_26-18_42/tables/670-Expression+%2D+Umbilical+Vein+Endothelial+Cells/LOCAL_ATTRS-org.cytoscape.model.CyEdge-Expression+%2D+Umbilical+Vein+Endothelial+Cells+default++edge.cytable
- CytoscapeSession-2018_09_26-18_42/tables/484-Network+of+Metabolic+Flexibility+%2D+Colour+Coded+by+Pathways/HIDDEN-org.cytoscape.model.CyNode-484+hidden+node.cytable
- CytoscapeSession-2018_09_26-18_42/tables/484-Network+of+Metabolic+Flexibility+%2D+Colour+Coded+by+Pathways/LOCAL_ATTRS-org.cytoscape.model.CyEdge-Network+of+Metabolic+Flexibility+%2D+Colour+Coded+by+Pathways+root+default++edge.cytable
- CytoscapeSession-2018_09_26-18_42/tables/670-Expression+%2D+Umbilical+Vein+Endothelial+Cells/HIDDEN-org.cytoscape.model.CyNode-670+hidden+node.cytable
- CytoscapeSession-2018_09_26-18_42/tables/654-Expression+%2D+Umbilical+Vein+Endothelial+Cells/SHARED_ATTRS-org.cytoscape.model.CyEdge-Expression+%2D+Umbilical+Vein+Endothelial+Cells+root+shared++edge.cytable
- CytoscapeSession-2018_09_26-18_42/tables/484-Network+of+Metabolic+Flexibility+%2D+Colour+Coded+by+Pathways/LOCAL_ATTRS-org.cytoscape.model.CyNode-Network+of+Metabolic+Flexibility+%2D+Colour+Coded+by+Pathways+root+default++node.cytable
- CytoscapeSession-2018_09_26-18_42/tables/484-Network+of+Metabolic+Flexibility+%2D+Colour+Coded+by+Pathways/HIDDEN-org.cytoscape.model.CyEdge-484+hidden+edge.cytable
- CytoscapeSession-2018_09_26-18_42/tables/654-Expression+%2D+Umbilical+Vein+Endothelial+Cells/HIDDEN-org.cytoscape.model.CyEdge-654+hidden+edge.cytable
- CytoscapeSession-2018_09_26-18_42/tables/654-Expression+%2D+Umbilical+Vein+Endothelial+Cells/LOCAL_ATTRS-org.cytoscape.model.CyNode-Expression+%2D+Umbilical+Vein+Endothelial+Cells+root+default++node.cytable
- CytoscapeSession-2018_09_26-18_42/tables/654-Expression+%2D+Umbilical+Vein+Endothelial+Cells/SHARED_ATTRS-org.cytoscape.model.CyNetwork-Expression+%2D+Umbilical+Vein+Endothelial+Cells+root+shared++network.cytable
- CytoscapeSession-2018_09_26-18_42/tables/500-Network+of+Metabolic+Flexibility+%2D+Colour+Coded+by+Pathways/HIDDEN-org.cytoscape.model.CyEdge-500+hidden+edge.cytable
- CytoscapeSession-2018_09_26-18_42/tables/484-Network+of+Metabolic+Flexibility+%2D+Colour+Coded+by+Pathways/SHARED_ATTRS-org.cytoscape.model.CyEdge-Network+of+Metabolic+Flexibility+%2D+Colour+Coded+by+Pathways+root+shared++edge.cytable
- CytoscapeSession-2018_09_26-18_42/tables/654-Expression+%2D+Umbilical+Vein+Endothelial+Cells/HIDDEN-org.cytoscape.model.CyNode-654+hidden+node.cytable
- CytoscapeSession-2018_09_26-18_42/tables/500-Network+of+Metabolic+Flexibility+%2D+Colour+Coded+by+Pathways/LOCAL_ATTRS-org.cytoscape.model.CyNode-Network+of+Metabolic+Flexibility+%2D+Colour+Coded+by+Pathways+default++node.cytable
- CytoscapeSession-2018_09_26-18_42/tables/484-Network+of+Metabolic+Flexibility+%2D+Colour+Coded+by+Pathways/SHARED_ATTRS-org.cytoscape.model.CyNetwork-Network+of+Metabolic+Flexibility+%2D+Colour+Coded+by+Pathways+root+shared++network.cytable
- CytoscapeSession-2018_09_26-18_42/tables/670-Expression+%2D+Umbilical+Vein+Endothelial+Cells/HIDDEN-org.cytoscape.model.CyEdge-670+hidden+edge.cytable
- CytoscapeSession-2018_09_26-18_42/tables/500-Network+of+Metabolic+Flexibility+%2D+Colour+Coded+by+Pathways/HIDDEN-org.cytoscape.model.CyNetwork-500+hidden+network.cytable
- CytoscapeSession-2018_09_26-18_42/tables/500-Network+of+Metabolic+Flexibility+%2D+Colour+Coded+by+Pathways/LOCAL_ATTRS-org.cytoscape.model.CyEdge-Network+of+Metabolic+Flexibility+%2D+Colour+Coded+by+Pathways+default++edge.cytable
- CytoscapeSession-2018_09_26-18_42/tables/654-Expression+%2D+Umbilical+Vein+Endothelial+Cells/SHARED_ATTRS-org.cytoscape.model.CyNode-Expression+%2D+Umbilical+Vein+Endothelial+Cells+root+shared++node.cytable
- CytoscapeSession-2018_09_26-18_42/tables/cytables.xml
- CytoscapeSession-2018_09_26-18_42/session_vizmap.xml
- CytoscapeSession-2018_09_26-18_42/properties/org.genemania.props
- CytoscapeSession-2018_09_26-18_42/properties/session_bookmarks.xml
- CytoscapeSession-2018_09_26-18_42/properties/groupSettings.props
- CytoscapeSession-2018_09_26-18_42/session_thumbnail.png
- CytoscapeSession-2018_09_26-18_42/apps/org.cytoscape.ding.customgraphicsmgr/image_metadata.props
- CytoscapeSession-2018_09_26-18_42/apps/org.cytoscape.swing-application/session_state.xml
- CytoscapeSession-2018_09_26-18_42/apps/org.cytoscape.swing-application/network_list.xml
- CytoscapeSession-2018_09_26-18_42/apps/org.cytoscape.filter/filters.json
- CytoscapeSession-2018_09_26-18_42/apps/org.cytoscape.filter/filterChains.json
- CytoscapeSession-2018_09_26-18_42/apps/org.cytoscape.browser/UnassignedTables.props
- CytoscapeSession-2018_09_26-18_42/apps/org.cytoscape.browser/NetworkTable.props
- CytoscapeSession-2018_09_26-18_42/apps/org.cytoscape.browser/EdgeTable.props
- CytoscapeSession-2018_09_26-18_42/apps/org.cytoscape.browser/NodeTable.props
