# Supplementary material
Source: publisher figshare collection journal article supplement (https://springernature.figshare.com/ndownloader/files/17562839)
Supplement: Supplementary file 1 [file 17562839 › CytoscapeSession-2018_09_26-18_42/apps/org.cytoscape.browser/EdgeTable.props]

Expression - Umbilical Vein Endothelial Cells default edge	0	SUID	false
Expression - Umbilical Vein Endothelial Cells default edge	1	selected	false
Expression - Umbilical Vein Endothelial Cells default edge	2	shared name	true
Expression - Umbilical Vein Endothelial Cells default edge	3	shared interaction	true
Expression - Umbilical Vein Endothelial Cells default edge	4	name	true
Expression - Umbilical Vein Endothelial Cells default edge	5	interaction	true
Expression - Umbilical Vein Endothelial Cells default edge	6	abstraction	true
Expression - Umbilical Vein Endothelial Cells default edge	7	event	true
Network of Metabolic Flexibility - Colour Coded by Pathways default edge	0	SUID	false
Network of Metabolic Flexibility - Colour Coded by Pathways default edge	1	selected	false
Network of Metabolic Flexibility - Colour Coded by Pathways default edge	2	shared name	true
Network of Metabolic Flexibility - Colour Coded by Pathways default edge	3	shared interaction	true
Network of Metabolic Flexibility - Colour Coded by Pathways default edge	4	name	true
Network of Metabolic Flexibility - Colour Coded by Pathways default edge	5	interaction	true
Network of Metabolic Flexibility - Colour Coded by Pathways default edge	6	abstraction	true
Network of Metabolic Flexibility - Colour Coded by Pathways default edge	7	event	true
