# Supplementary material
Source: publisher figshare collection journal article supplement (https://springernature.figshare.com/ndownloader/files/17562839)
Supplement: Supplementary file 1 [file 17562839 › CytoscapeSession-2018_09_26-18_42/apps/org.cytoscape.browser/NetworkTable.props]

Network of Metabolic Flexibility - Colour Coded by Pathways default network	0	SUID	false
Network of Metabolic Flexibility - Colour Coded by Pathways default network	1	selected	false
Network of Metabolic Flexibility - Colour Coded by Pathways default network	2	shared name	true
Network of Metabolic Flexibility - Colour Coded by Pathways default network	3	name	true
Network of Metabolic Flexibility - Colour Coded by Pathways default network	4	__Annotations	true
Network of Metabolic Flexibility - Colour Coded by Pathways default network	5	SumInformationLoss	true
Network of Metabolic Flexibility - Colour Coded by Pathways default network	6	NormalizedSumInformationLoss	true
Expression - Umbilical Vein Endothelial Cells default network	0	SUID	false
Expression - Umbilical Vein Endothelial Cells default network	1	selected	false
Expression - Umbilical Vein Endothelial Cells default network	2	shared name	true
Expression - Umbilical Vein Endothelial Cells default network	3	name	true
Expression - Umbilical Vein Endothelial Cells default network	4	__Annotations	true
Expression - Umbilical Vein Endothelial Cells default network	5	SumInformationLoss	true
Expression - Umbilical Vein Endothelial Cells default network	6	NormalizedSumInformationLoss	true
