# Supplementary material
Source: publisher figshare collection journal article supplement (https://springernature.figshare.com/ndownloader/files/17562839)
Supplement: Supplementary file 1 [file 17562839 › CytoscapeSession-2018_09_26-18_42/apps/org.cytoscape.browser/NodeTable.props]

Expression - Umbilical Vein Endothelial Cells default node	0	SUID	false
Expression - Umbilical Vein Endothelial Cells default node	1	selected	false
Expression - Umbilical Vein Endothelial Cells default node	2	shared name	true
Expression - Umbilical Vein Endothelial Cells default node	3	name	true
Expression - Umbilical Vein Endothelial Cells default node	4	Category	true
Expression - Umbilical Vein Endothelial Cells default node	5	ENSG	true
Expression - Umbilical Vein Endothelial Cells default node	6	Localisation	true
Expression - Umbilical Vein Endothelial Cells default node	7	NodeType	true
Expression - Umbilical Vein Endothelial Cells default node	8	endothelial cell of umbilical vein (proliferating)	true
Expression - Umbilical Vein Endothelial Cells default node	9	Log2TPM (endothelial cell of umbilical vein (proliferating))	true
Expression - Umbilical Vein Endothelial Cells default node	10	endothelial cell of umbilical vein (resting)	true
Expression - Umbilical Vein Endothelial Cells default node	11	Log2TPM (endothelial cell of umbilical vein (resting) )	true
Network of Metabolic Flexibility - Colour Coded by Pathways default node	0	SUID	false
Network of Metabolic Flexibility - Colour Coded by Pathways default node	1	selected	false
Network of Metabolic Flexibility - Colour Coded by Pathways default node	2	shared name	true
Network of Metabolic Flexibility - Colour Coded by Pathways default node	3	name	true
Network of Metabolic Flexibility - Colour Coded by Pathways default node	4	Category	true
Network of Metabolic Flexibility - Colour Coded by Pathways default node	5	ENSG	true
Network of Metabolic Flexibility - Colour Coded by Pathways default node	6	Localisation	true
Network of Metabolic Flexibility - Colour Coded by Pathways default node	7	NodeType	true
