# Supplementary material
Source: publisher figshare collection journal article supplement (https://springernature.figshare.com/ndownloader/files/17562839)
Supplement: Supplementary file 1 [file 17562839 › CytoscapeSession-2018_09_26-18_42/networks/484-Network+of+Metabolic+Flexibility+%2D+Colour+Coded+by+Pathways.xgmml]

<?xml version="1.0" encoding="UTF-8" standalone="yes"?>
<graph id="484" label="Network of Metabolic Flexibility - Colour Coded by Pathways" cy:view="0" cy:registered="0" cy:documentVersion="3.0" xmlns:dc="http://purl.org/dc/elements/1.1/" xmlns:xlink="http://www.w3.org/1999/xlink" xmlns:rdf="http://www.w3.org/1999/02/22-rdf-syntax-ns#" xmlns:cy="http://www.cytoscape.org" xmlns="http://www.cs.rpi.edu/XGMML">
  <att>
    <graph id="500" label="Network of Metabolic Flexibility - Colour Coded by Pathways" cy:registered="1">
      <node id="572" label="DLD"/>
      <node id="571" label="DLAT"/>
      <node id="570" label="PDHB"/>
      <node id="569" label="PDHA1"/>
      <node id="568" label="PFKP"/>
      <node id="567" label="PFKM"/>
      <node id="566" label="PFKL"/>
      <node id="565" label="Glucose"/>
      <node id="564" label="Glucose Uptake"/>
      <node id="563" label="SLC2A4"/>
      <node id="562" label="SLC2A1"/>
      <node id="561" label="Glucose"/>
      <node id="560" label="Glycolysis"/>
      <node id="559" label="PFK1"/>
      <node id="558" label="Pyruvate"/>
      <node id="557" label="Decarboxylation"/>
      <node id="556" label="PDC"/>
      <node id="555" label="Acetyl-CoA"/>
      <node id="554" label="Citrate"/>
      <node id="553" label="TCA Cycle"/>
      <node id="552" label="NAD+"/>
      <node id="551" label="NADH"/>
      <node id="550" label="AMP"/>
      <node id="549" label="ATP"/>
      <node id="548" label="Citrate Transport"/>
      <node id="547" label="SLC25A1"/>
      <node id="546" label="Citrate"/>
      <node id="545" label="Fatty Acids"/>
      <node id="544" label="Fatty Acid Uptake"/>
      <node id="543" label="CD36"/>
      <node id="542" label="Fatty Acids"/>
      <node id="541" label="Fatty Acid Degradation"/>
      <node id="540" label="Acetyl-CoA"/>
      <node id="539" label="Fatty Acid Synthesis"/>
      <node id="538" label="FASN"/>
      <node id="537" label="Carboxylation"/>
      <node id="536" label="Malonyl-CoA"/>
      <node id="535" label="ACACA"/>
      <node id="534" label="AMPK"/>
      <node id="533" label="PDK4"/>
      <node id="532" label="PPARG"/>
      <node id="531" label="PRKAA1"/>
      <node id="530" label="PRKAA2"/>
      <node id="529" label="PRKAB1"/>
      <node id="528" label="PRKAB2"/>
      <node id="527" label="PRKAG1"/>
      <node id="526" label="PRKAG2"/>
      <node id="525" label="PRKAG3"/>
      <node id="524" label="PDK3"/>
      <node id="523" label="PDK2"/>
      <node id="522" label="PDK1"/>
      <node id="521" label="ACLY"/>
      <node id="520" label="Acetyl-CoA Synthesis"/>
      <node id="519" label="SCD"/>
      <node id="518" label="PDHX"/>
      <node id="517" label="CPT2"/>
      <node id="516" label="CPT1A"/>
      <node id="515" label="Acyl Transport"/>
      <node id="514" label="Acyl-CoA"/>
      <node id="513" label="Pyruvate Transport"/>
      <node id="512" label="MPC1"/>
      <node id="511" label="MPC2"/>
      <node id="510" label="Pyruvate"/>
      <edge id="653" label="DLD (interacts with) PDC" source="572" target="556" cy:directed="1"/>
      <edge id="652" label="DLAT (interacts with) PDC" source="571" target="556" cy:directed="1"/>
      <edge id="651" label="PDHB (interacts with) PDC" source="570" target="556" cy:directed="1"/>
      <edge id="650" label="PDHA1 (interacts with) PDC" source="569" target="556" cy:directed="1"/>
      <edge id="649" label="PFKP (forms) PFK1" source="568" target="559" cy:directed="1"/>
      <edge id="648" label="PFKM (forms) PFK1" source="567" target="559" cy:directed="1"/>
      <edge id="647" label="PFKL (forms) PFK1" source="566" target="559" cy:directed="1"/>
      <edge id="646" label="Glucose [circulation] (taken up) Glucose Uptake" source="565" target="564" cy:directed="1"/>
      <edge id="645" label="Glucose Uptake (results in) Glucose [cytosol]" source="564" target="561" cy:directed="1"/>
      <edge id="644" label="GLUT4 [insulin mediated] (facilitates) Glucose Uptake" source="563" target="564" cy:directed="1"/>
      <edge id="643" label="GLUT1 [insulin independent] (facilitates) Glucose Uptake" source="562" target="564" cy:directed="1"/>
      <edge id="642" label="Glucose [cytosol] (consumed by) Glycolysis" source="561" target="560" cy:directed="1"/>
      <edge id="641" label="Glycolysis (interacts with) Pyruvate" source="560" target="510" cy:directed="1"/>
      <edge id="640" label="PFK1 (facilitates) Glycolysis" source="559" target="560" cy:directed="1"/>
      <edge id="639" label="Pyruvate (consumed by) conversionP" source="558" target="557" cy:directed="1"/>
      <edge id="638" label="Pyruvate (inhibits) PDK4" source="558" target="533" cy:directed="1"/>
      <edge id="637" label="Pyruvate (inhibits) PDK3" source="558" target="524" cy:directed="1"/>
      <edge id="636" label="Pyruvate (inhibits) PDK2" source="558" target="523" cy:directed="1"/>
      <edge id="635" label="Pyruvate (inhibits) PDK1" source="558" target="522" cy:directed="1"/>
      <edge id="634" label="conversionP (produces) Acetyl-CoA" source="557" target="555" cy:directed="1"/>
      <edge id="633" label="PDC (facilitates) conversionP" source="556" target="557" cy:directed="1"/>
      <edge id="632" label="Acetyl-CoA (converts into) Citrate" source="555" target="554" cy:directed="1"/>
      <edge id="631" label="Citrate (consumed by) TCA Cycle" source="554" target="553" cy:directed="1"/>
      <edge id="630" label="Citrate (transportation) Citrate-transport" source="554" target="548" cy:directed="1"/>
      <edge id="629" label="TCA Cycle (produces) Citrate" source="553" target="554" cy:directed="1"/>
      <edge id="628" label="TCA Cycle (produces) NADH" source="553" target="551" cy:directed="1"/>
      <edge id="627" label="TCA Cycle (produces) ATP" source="553" target="549" cy:directed="1"/>
      <edge id="626" label="NAD+ (consumed by) TCA Cycle" source="552" target="553" cy:directed="1"/>
      <edge id="625" label="NADH (activates) PDK4" source="551" target="533" cy:directed="1"/>
      <edge id="624" label="NADH (activates) PDK3" source="551" target="524" cy:directed="1"/>
      <edge id="623" label="NADH (activates) PDK2" source="551" target="523" cy:directed="1"/>
      <edge id="622" label="NADH (activates) PDK1" source="551" target="522" cy:directed="1"/>
      <edge id="621" label="AMP (consumed by) TCA Cycle" source="550" target="553" cy:directed="1"/>
      <edge id="620" label="AMP (activates) AMPK" source="550" target="534" cy:directed="1"/>
      <edge id="619" label="ATP (activates) PDK4" source="549" target="533" cy:directed="1"/>
      <edge id="618" label="ATP (activates) PDK3" source="549" target="524" cy:directed="1"/>
      <edge id="617" label="ATP (activates) PDK2" source="549" target="523" cy:directed="1"/>
      <edge id="616" label="ATP (activates) PDK1" source="549" target="522" cy:directed="1"/>
      <edge id="615" label="Citrate-transport (results in) Citrate [cytosol]" source="548" target="546" cy:directed="1"/>
      <edge id="614" label="CiC (facilitates) Citrate-transport" source="547" target="548" cy:directed="1"/>
      <edge id="613" label="Citrate [cytosol] (inhibits) PFK1" source="546" target="559" cy:directed="1"/>
      <edge id="612" label="Citrate [cytosol] (interacts with) Acetyl-CoA Synthesis" source="546" target="520" cy:directed="1"/>
      <edge id="611" label="Fatty Acids [circulation] (taken up) FA Uptake" source="545" target="544" cy:directed="1"/>
      <edge id="610" label="FA Uptake (results in) Fatty Acids [cytosol]" source="544" target="542" cy:directed="1"/>
      <edge id="609" label="CD36 (facilitates) FA Uptake" source="543" target="544" cy:directed="1"/>
      <edge id="608" label="Fatty Acids [cytosol] (activates) PPARg" source="542" target="532" cy:directed="1"/>
      <edge id="607" label="Fatty Acids [cytosol] (conversionF) BOxidation" source="542" target="541" cy:directed="1"/>
      <edge id="606" label="BOxidation (interacts with) Acyl-CoA" source="541" target="514" cy:directed="1"/>
      <edge id="605" label="Acetyl-CoA [cytosol] (interacts with) conversionC" source="540" target="537" cy:directed="1"/>
      <edge id="604" label="Acetyl-CoA [cytosol] (consumed by) Fatty Acid Synthesis" source="540" target="539" cy:directed="1"/>
      <edge id="603" label="Fatty Acid Synthesis (produces) Fatty Acids [cytosol]" source="539" target="542" cy:directed="1"/>
      <edge id="602" label="FAS (facilitates) Fatty Acid Synthesis" source="538" target="539" cy:directed="1"/>
      <edge id="601" label="conversionC (produces) Malonyl-CoA" source="537" target="536" cy:directed="1"/>
      <edge id="600" label="Malonyl-CoA (interacts with) Fatty Acid Synthesis" source="536" target="539" cy:directed="1"/>
      <edge id="599" label="Malonyl-CoA (interacts with) ENSG00000110090" source="536" target="516" cy:directed="1"/>
      <edge id="598" label="ACC (facilitates) conversionC" source="535" target="537" cy:directed="1"/>
      <edge id="597" label="AMPK (inhibits) ACC" source="534" target="535" cy:directed="1"/>
      <edge id="596" label="PDK4 (inhibits) PDC" source="533" target="556" cy:directed="1"/>
      <edge id="595" label="PPARg (activates) PDK4" source="532" target="533" cy:directed="1"/>
      <edge id="594" label="AMPKA1 (forms) AMPK" source="531" target="534" cy:directed="1"/>
      <edge id="593" label="AMPKA2 (forms) AMPK" source="530" target="534" cy:directed="1"/>
      <edge id="592" label="AMPKB1 (forms) AMPK" source="529" target="534" cy:directed="1"/>
      <edge id="591" label="AMPKB2 (forms) AMPK" source="528" target="534" cy:directed="1"/>
      <edge id="590" label="AMPKG1 (forms) AMPK" source="527" target="534" cy:directed="1"/>
      <edge id="589" label="AMPKG2 (forms) AMPK" source="526" target="534" cy:directed="1"/>
      <edge id="588" label="AMPKG3 (forms) AMPK" source="525" target="534" cy:directed="1"/>
      <edge id="587" label="PDK3 (inhibits) PDC" source="524" target="556" cy:directed="1"/>
      <edge id="586" label="PDK2 (inhibits) PDC" source="523" target="556" cy:directed="1"/>
      <edge id="585" label="PDK1 (inhibits) PDC" source="522" target="556" cy:directed="1"/>
      <edge id="584" label="ACLY (interacts with) Acetyl-CoA Synthesis" source="521" target="520" cy:directed="1"/>
      <edge id="583" label="Acetyl-CoA Synthesis (interacts with) Acetyl-CoA [cytosol]" source="520" target="540" cy:directed="1"/>
      <edge id="582" label="ENSG00000099194 (interacts with) Fatty Acid Synthesis" source="519" target="539" cy:directed="1"/>
      <edge id="581" label="PDHX (interacts with) PDC" source="518" target="556" cy:directed="1"/>
      <edge id="580" label="ENSG00000110090 (interacts with) CoA Transport" source="517" target="515" cy:directed="1"/>
      <edge id="579" label="ENSG00000157184 (interacts with) CoA Transport" source="516" target="515" cy:directed="1"/>
      <edge id="578" label="CoA Transport (interacts with) Acetyl-CoA" source="515" target="555" cy:directed="1"/>
      <edge id="577" label="Acyl-CoA (interacts with) CoA Transport" source="514" target="515" cy:directed="1"/>
      <edge id="576" label="Pyruvate Transport (interacts with) Pyruvate" source="513" target="558" cy:directed="1"/>
      <edge id="575" label="MPC1 (interacts with) Pyruvate Transport" source="512" target="513" cy:directed="1"/>
      <edge id="574" label="MPC2 (interacts with) Pyruvate Transport" source="511" target="513" cy:directed="1"/>
      <edge id="573" label="Pyruvate (interacts with) Pyruvate Transport" source="510" target="513" cy:directed="1"/>
    </graph>
  </att>
</graph>
