# Supplementary material
Source: publisher figshare collection journal article supplement (https://springernature.figshare.com/ndownloader/files/17562839)
Supplement: Supplementary file 1 [file 17562839 › CytoscapeSession-2018_09_26-18_42/networks/654-Expression+%2D+Umbilical+Vein+Endothelial+Cells.xgmml]

<?xml version="1.0" encoding="UTF-8" standalone="yes"?>
<graph id="654" label="Expression - Umbilical Vein Endothelial Cells" cy:view="0" cy:registered="0" cy:documentVersion="3.0" xmlns:dc="http://purl.org/dc/elements/1.1/" xmlns:xlink="http://www.w3.org/1999/xlink" xmlns:rdf="http://www.w3.org/1999/02/22-rdf-syntax-ns#" xmlns:cy="http://www.cytoscape.org" xmlns="http://www.cs.rpi.edu/XGMML">
  <att>
    <graph id="670" label="Expression - Umbilical Vein Endothelial Cells" cy:registered="1">
      <node id="744" label="SLC2A3"/>
      <node id="743" label="SLC2A2"/>
      <node id="742" label="Pyruvate"/>
      <node id="741" label="MPC2"/>
      <node id="740" label="MPC1"/>
      <node id="739" label="Pyruvate Transport"/>
      <node id="738" label="Acyl-CoA"/>
      <node id="737" label="Acyl Transport"/>
      <node id="736" label="CPT1A"/>
      <node id="735" label="CPT2"/>
      <node id="734" label="PDHX"/>
      <node id="733" label="SCD"/>
      <node id="732" label="Acetyl-CoA Synthesis"/>
      <node id="731" label="ACLY"/>
      <node id="730" label="PDK1"/>
      <node id="729" label="PDK2"/>
      <node id="728" label="PDK3"/>
      <node id="727" label="PRKAG3"/>
      <node id="726" label="PRKAG2"/>
      <node id="725" label="PRKAG1"/>
      <node id="724" label="PRKAB2"/>
      <node id="723" label="PRKAB1"/>
      <node id="722" label="PRKAA2"/>
      <node id="721" label="PRKAA1"/>
      <node id="720" label="PPARG"/>
      <node id="719" label="PDK4"/>
      <node id="718" label="AMPK"/>
      <node id="717" label="ACACA"/>
      <node id="716" label="Malonyl-CoA"/>
      <node id="715" label="Carboxylation"/>
      <node id="714" label="FASN"/>
      <node id="713" label="Fatty Acid Synthesis"/>
      <node id="712" label="Acetyl-CoA"/>
      <node id="711" label="Fatty Acid Degradation"/>
      <node id="710" label="Fatty Acids"/>
      <node id="709" label="CD36"/>
      <node id="708" label="Fatty Acid Uptake"/>
      <node id="707" label="Fatty Acids"/>
      <node id="706" label="Citrate"/>
      <node id="705" label="SLC25A1"/>
      <node id="704" label="Citrate Transport"/>
      <node id="703" label="ATP"/>
      <node id="702" label="AMP"/>
      <node id="701" label="NADH"/>
      <node id="700" label="NAD+"/>
      <node id="699" label="TCA Cycle"/>
      <node id="698" label="Citrate"/>
      <node id="697" label="Acetyl-CoA"/>
      <node id="696" label="PDC"/>
      <node id="695" label="Decarboxylation"/>
      <node id="694" label="Pyruvate"/>
      <node id="693" label="PFK1"/>
      <node id="692" label="Glycolysis"/>
      <node id="691" label="Glucose"/>
      <node id="690" label="SLC2A1"/>
      <node id="689" label="SLC2A4"/>
      <node id="688" label="Glucose Uptake"/>
      <node id="687" label="Glucose"/>
      <node id="686" label="PFKL"/>
      <node id="685" label="PFKM"/>
      <node id="684" label="PFKP"/>
      <node id="683" label="PDHA1"/>
      <node id="682" label="PDHB"/>
      <node id="681" label="DLAT"/>
      <node id="680" label="DLD"/>
      <edge id="827" label="ENSG00000059804 (interacts with) Glucose Uptake" source="744" target="688" cy:directed="1"/>
      <edge id="826" label="ENSG00000163581 (interacts with) Glucose Uptake" source="743" target="688" cy:directed="1"/>
      <edge id="825" label="Pyruvate (interacts with) Pyruvate Transport" source="742" target="739" cy:directed="1"/>
      <edge id="824" label="MPC2 (interacts with) Pyruvate Transport" source="741" target="739" cy:directed="1"/>
      <edge id="823" label="MPC1 (interacts with) Pyruvate Transport" source="740" target="739" cy:directed="1"/>
      <edge id="822" label="Pyruvate Transport (interacts with) Pyruvate" source="739" target="694" cy:directed="1"/>
      <edge id="821" label="Acyl-CoA (interacts with) CoA Transport" source="738" target="737" cy:directed="1"/>
      <edge id="820" label="CoA Transport (interacts with) Acetyl-CoA" source="737" target="697" cy:directed="1"/>
      <edge id="819" label="ENSG00000157184 (interacts with) CoA Transport" source="736" target="737" cy:directed="1"/>
      <edge id="818" label="ENSG00000110090 (interacts with) CoA Transport" source="735" target="737" cy:directed="1"/>
      <edge id="817" label="PDHX (interacts with) PDC" source="734" target="696" cy:directed="1"/>
      <edge id="816" label="ENSG00000099194 (interacts with) Fatty Acid Synthesis" source="733" target="713" cy:directed="1"/>
      <edge id="815" label="Acetyl-CoA Synthesis (interacts with) Acetyl-CoA [cytosol]" source="732" target="712" cy:directed="1"/>
      <edge id="814" label="ACLY (interacts with) Acetyl-CoA Synthesis" source="731" target="732" cy:directed="1"/>
      <edge id="813" label="PDK1 (inhibits) PDC" source="730" target="696" cy:directed="1"/>
      <edge id="812" label="PDK2 (inhibits) PDC" source="729" target="696" cy:directed="1"/>
      <edge id="811" label="PDK3 (inhibits) PDC" source="728" target="696" cy:directed="1"/>
      <edge id="810" label="AMPKG3 (forms) AMPK" source="727" target="718" cy:directed="1"/>
      <edge id="809" label="AMPKG2 (forms) AMPK" source="726" target="718" cy:directed="1"/>
      <edge id="808" label="AMPKG1 (forms) AMPK" source="725" target="718" cy:directed="1"/>
      <edge id="807" label="AMPKB2 (forms) AMPK" source="724" target="718" cy:directed="1"/>
      <edge id="806" label="AMPKB1 (forms) AMPK" source="723" target="718" cy:directed="1"/>
      <edge id="805" label="AMPKA2 (forms) AMPK" source="722" target="718" cy:directed="1"/>
      <edge id="804" label="AMPKA1 (forms) AMPK" source="721" target="718" cy:directed="1"/>
      <edge id="803" label="PPARg (activates) PDK4" source="720" target="719" cy:directed="1"/>
      <edge id="802" label="PDK4 (inhibits) PDC" source="719" target="696" cy:directed="1"/>
      <edge id="801" label="AMPK (inhibits) ACC" source="718" target="717" cy:directed="1"/>
      <edge id="800" label="ACC (facilitates) conversionC" source="717" target="715" cy:directed="1"/>
      <edge id="799" label="Malonyl-CoA (interacts with) Fatty Acid Synthesis" source="716" target="713" cy:directed="1"/>
      <edge id="798" label="Malonyl-CoA (interacts with) ENSG00000157184" source="716" target="736" cy:directed="1"/>
      <edge id="797" label="conversionC (produces) Malonyl-CoA" source="715" target="716" cy:directed="1"/>
      <edge id="796" label="FAS (facilitates) Fatty Acid Synthesis" source="714" target="713" cy:directed="1"/>
      <edge id="795" label="Fatty Acid Synthesis (produces) Fatty Acids [cytosol]" source="713" target="710" cy:directed="1"/>
      <edge id="794" label="Acetyl-CoA [cytosol] (consumed by) Fatty Acid Synthesis" source="712" target="713" cy:directed="1"/>
      <edge id="793" label="Acetyl-CoA [cytosol] (interacts with) conversionC" source="712" target="715" cy:directed="1"/>
      <edge id="792" label="BOxidation (interacts with) Acyl-CoA" source="711" target="738" cy:directed="1"/>
      <edge id="791" label="Fatty Acids [cytosol] (conversionF) BOxidation" source="710" target="711" cy:directed="1"/>
      <edge id="790" label="Fatty Acids [cytosol] (activates) PPARg" source="710" target="720" cy:directed="1"/>
      <edge id="789" label="CD36 (facilitates) FA Uptake" source="709" target="708" cy:directed="1"/>
      <edge id="788" label="FA Uptake (results in) Fatty Acids [cytosol]" source="708" target="710" cy:directed="1"/>
      <edge id="787" label="Fatty Acids [circulation] (taken up) FA Uptake" source="707" target="708" cy:directed="1"/>
      <edge id="786" label="Citrate [cytosol] (interacts with) Acetyl-CoA Synthesis" source="706" target="732" cy:directed="1"/>
      <edge id="785" label="Citrate [cytosol] (inhibits) PFK1" source="706" target="693" cy:directed="1"/>
      <edge id="784" label="CiC (facilitates) Citrate-transport" source="705" target="704" cy:directed="1"/>
      <edge id="783" label="Citrate-transport (results in) Citrate [cytosol]" source="704" target="706" cy:directed="1"/>
      <edge id="782" label="ATP (activates) PDK1" source="703" target="730" cy:directed="1"/>
      <edge id="781" label="ATP (activates) PDK2" source="703" target="729" cy:directed="1"/>
      <edge id="780" label="ATP (activates) PDK3" source="703" target="728" cy:directed="1"/>
      <edge id="779" label="ATP (activates) PDK4" source="703" target="719" cy:directed="1"/>
      <edge id="778" label="AMP (activates) AMPK" source="702" target="718" cy:directed="1"/>
      <edge id="777" label="AMP (consumed by) TCA Cycle" source="702" target="699" cy:directed="1"/>
      <edge id="776" label="NADH (activates) PDK1" source="701" target="730" cy:directed="1"/>
      <edge id="775" label="NADH (activates) PDK2" source="701" target="729" cy:directed="1"/>
      <edge id="774" label="NADH (activates) PDK3" source="701" target="728" cy:directed="1"/>
      <edge id="773" label="NADH (activates) PDK4" source="701" target="719" cy:directed="1"/>
      <edge id="772" label="NAD+ (consumed by) TCA Cycle" source="700" target="699" cy:directed="1"/>
      <edge id="771" label="TCA Cycle (produces) ATP" source="699" target="703" cy:directed="1"/>
      <edge id="770" label="TCA Cycle (produces) NADH" source="699" target="701" cy:directed="1"/>
      <edge id="769" label="TCA Cycle (produces) Citrate" source="699" target="698" cy:directed="1"/>
      <edge id="768" label="Citrate (transportation) Citrate-transport" source="698" target="704" cy:directed="1"/>
      <edge id="767" label="Citrate (consumed by) TCA Cycle" source="698" target="699" cy:directed="1"/>
      <edge id="766" label="Acetyl-CoA (converts into) Citrate" source="697" target="698" cy:directed="1"/>
      <edge id="765" label="PDC (facilitates) conversionP" source="696" target="695" cy:directed="1"/>
      <edge id="764" label="conversionP (produces) Acetyl-CoA" source="695" target="697" cy:directed="1"/>
      <edge id="763" label="Pyruvate (inhibits) PDK1" source="694" target="730" cy:directed="1"/>
      <edge id="762" label="Pyruvate (inhibits) PDK2" source="694" target="729" cy:directed="1"/>
      <edge id="761" label="Pyruvate (inhibits) PDK3" source="694" target="728" cy:directed="1"/>
      <edge id="760" label="Pyruvate (inhibits) PDK4" source="694" target="719" cy:directed="1"/>
      <edge id="759" label="Pyruvate (consumed by) conversionP" source="694" target="695" cy:directed="1"/>
      <edge id="758" label="PFK1 (facilitates) Glycolysis" source="693" target="692" cy:directed="1"/>
      <edge id="757" label="Glycolysis (interacts with) Pyruvate" source="692" target="742" cy:directed="1"/>
      <edge id="756" label="Glucose [cytosol] (consumed by) Glycolysis" source="691" target="692" cy:directed="1"/>
      <edge id="755" label="GLUT1 [insulin independent] (facilitates) Glucose Uptake" source="690" target="688" cy:directed="1"/>
      <edge id="754" label="GLUT4 [insulin mediated] (facilitates) Glucose Uptake" source="689" target="688" cy:directed="1"/>
      <edge id="753" label="Glucose Uptake (results in) Glucose [cytosol]" source="688" target="691" cy:directed="1"/>
      <edge id="752" label="Glucose [circulation] (taken up) Glucose Uptake" source="687" target="688" cy:directed="1"/>
      <edge id="751" label="PFKL (forms) PFK1" source="686" target="693" cy:directed="1"/>
      <edge id="750" label="PFKM (forms) PFK1" source="685" target="693" cy:directed="1"/>
      <edge id="749" label="PFKP (forms) PFK1" source="684" target="693" cy:directed="1"/>
      <edge id="748" label="PDHA1 (interacts with) PDC" source="683" target="696" cy:directed="1"/>
      <edge id="747" label="PDHB (interacts with) PDC" source="682" target="696" cy:directed="1"/>
      <edge id="746" label="DLAT (interacts with) PDC" source="681" target="696" cy:directed="1"/>
      <edge id="745" label="DLD (interacts with) PDC" source="680" target="696" cy:directed="1"/>
    </graph>
  </att>
</graph>
