# Supplementary material
Source: publisher figshare collection journal article supplement (https://springernature.figshare.com/ndownloader/files/17562839)
Supplement: Supplementary file 1 [file 17562839 › CytoscapeSession-2018_09_26-18_42/properties/org.genemania.props]

#Written by: Cytoscape's PropertiesWriterImpl
#Wed Sep 26 18:42:36 CEST 2018
