# Supplementary material
Source: publisher figshare collection journal article supplement (https://springernature.figshare.com/ndownloader/files/17562839)
Supplement: Supplementary file 1 [file 17562839 › CytoscapeSession-2018_09_26-18_42/session_vizmap.xml]

<?xml version="1.0" encoding="UTF-8" standalone="yes"?>
<vizmap documentVersion="3.0" id="VizMap-2018_09_26-18_42">
    <visualStyle name="BioPAX">
        <network/>
        <node>
            <dependency name="nodeCustomGraphicsSizeSync" value="true"/>
            <dependency name="nodeSizeLocked" value="false"/>
            <visualProperty name="NODE_BORDER_PAINT" default="#006666">
                <discreteMapping attributeType="string" attributeName="BIOPAX_TYPE">
                    <discreteMappingEntry value="#006666" attributeValue="Complex"/>
                </discreteMapping>
            </visualProperty>
            <visualProperty name="NODE_FILL_COLOR" default="#FFFFFF">
                <discreteMapping attributeType="string" attributeName="BIOPAX_TYPE">
                    <discreteMappingEntry value="#FFFFFF" attributeValue="Complex"/>
                </discreteMapping>
            </visualProperty>
            <visualProperty name="NODE_WIDTH" default="20.0">
                <discreteMapping attributeType="string" attributeName="BIOPAX_TYPE">
                    <discreteMappingEntry value="13.4" attributeValue="BiochemicalReaction"/>
                    <discreteMappingEntry value="13.4" attributeValue="GeneticInteraction"/>
                    <discreteMappingEntry value="13.4" attributeValue="Interaction"/>
                    <discreteMappingEntry value="13.4" attributeValue="TransportWithBiochemicalReaction"/>
                    <discreteMappingEntry value="13.4" attributeValue="Conversion"/>
                    <discreteMappingEntry value="13.4" attributeValue="ComplexAssembly"/>
                    <discreteMappingEntry value="13.4" attributeValue="Complex"/>
                    <discreteMappingEntry value="13.4" attributeValue="Degradation"/>
                    <discreteMappingEntry value="13.4" attributeValue="TemplateReactionRegulation"/>
                    <discreteMappingEntry value="13.4" attributeValue="Control"/>
                    <discreteMappingEntry value="13.4" attributeValue="MolecularInteraction"/>
                    <discreteMappingEntry value="13.4" attributeValue="Modulation"/>
                    <discreteMappingEntry value="13.4" attributeValue="TemplateReaction"/>
                    <discreteMappingEntry value="13.4" attributeValue="Catalysis"/>
                    <discreteMappingEntry value="13.4" attributeValue="Transport"/>
                </discreteMapping>
            </visualProperty>
            <visualProperty name="NODE_SHAPE" default="ELLIPSE">
                <discreteMapping attributeType="string" attributeName="BIOPAX_TYPE">
                    <discreteMappingEntry value="ELLIPSE" attributeValue="SimplePhysicalEntity"/>
                    <discreteMappingEntry value="ELLIPSE" attributeValue="Rna"/>
                    <discreteMappingEntry value="RECTANGLE" attributeValue="BiochemicalReaction"/>
                    <discreteMappingEntry value="RECTANGLE" attributeValue="GeneticInteraction"/>
                    <discreteMappingEntry value="RECTANGLE" attributeValue="Interaction"/>
                    <discreteMappingEntry value="RECTANGLE" attributeValue="TransportWithBiochemicalReaction"/>
                    <discreteMappingEntry value="RECTANGLE" attributeValue="Conversion"/>
                    <discreteMappingEntry value="RECTANGLE" attributeValue="ComplexAssembly"/>
                    <discreteMappingEntry value="ELLIPSE" attributeValue="Protein"/>
                    <discreteMappingEntry value="DIAMOND" attributeValue="Complex"/>
                    <discreteMappingEntry value="ELLIPSE" attributeValue="RnaRegion"/>
                    <discreteMappingEntry value="RECTANGLE" attributeValue="Degradation"/>
                    <discreteMappingEntry value="TRIANGLE" attributeValue="TemplateReactionRegulation"/>
                    <discreteMappingEntry value="TRIANGLE" attributeValue="Control"/>
                    <discreteMappingEntry value="ELLIPSE" attributeValue="PhysicalEntity"/>
                    <discreteMappingEntry value="ELLIPSE" attributeValue="DnaRegion"/>
                    <discreteMappingEntry value="ELLIPSE" attributeValue="SmallMolecule"/>
                    <discreteMappingEntry value="ELLIPSE" attributeValue="Dna"/>
                    <discreteMappingEntry value="RECTANGLE" attributeValue="MolecularInteraction"/>
                    <discreteMappingEntry value="TRIANGLE" attributeValue="Modulation"/>
                    <discreteMappingEntry value="RECTANGLE" attributeValue="TemplateReaction"/>
                    <discreteMappingEntry value="TRIANGLE" attributeValue="Catalysis"/>
                    <discreteMappingEntry value="RECTANGLE" attributeValue="Transport"/>
                    <discreteMappingEntry value="ELLIPSE" attributeValue="Protein-phosphorylated"/>
                </discreteMapping>
            </visualProperty>
            <visualProperty name="NODE_HEIGHT" default="20.0">
                <discreteMapping attributeType="string" attributeName="BIOPAX_TYPE">
                    <discreteMappingEntry value="13.4" attributeValue="BiochemicalReaction"/>
                    <discreteMappingEntry value="13.4" attributeValue="GeneticInteraction"/>
                    <discreteMappingEntry value="13.4" attributeValue="Interaction"/>
                    <discreteMappingEntry value="13.4" attributeValue="TransportWithBiochemicalReaction"/>
                    <discreteMappingEntry value="13.4" attributeValue="Conversion"/>
                    <discreteMappingEntry value="13.4" attributeValue="ComplexAssembly"/>
                    <discreteMappingEntry value="13.4" attributeValue="Complex"/>
                    <discreteMappingEntry value="13.4" attributeValue="Degradation"/>
                    <discreteMappingEntry value="13.4" attributeValue="TemplateReactionRegulation"/>
                    <discreteMappingEntry value="13.4" attributeValue="Control"/>
                    <discreteMappingEntry value="13.4" attributeValue="MolecularInteraction"/>
                    <discreteMappingEntry value="13.4" attributeValue="Modulation"/>
                    <discreteMappingEntry value="13.4" attributeValue="TemplateReaction"/>
                    <discreteMappingEntry value="13.4" attributeValue="Catalysis"/>
                    <discreteMappingEntry value="13.4" attributeValue="Transport"/>
                </discreteMapping>
            </visualProperty>
            <visualProperty name="NODE_LABEL">
                <passthroughMapping attributeType="string" attributeName="name"/>
            </visualProperty>
        </node>
        <edge>
            <dependency name="arrowColorMatchesEdge" value="true"/>
            <visualProperty name="EDGE_TARGET_ARROW_SHAPE">
                <discreteMapping attributeType="string" attributeName="interaction">
                    <discreteMappingEntry value="T" attributeValue="INHIBITION_NONCOMPETITIVE"/>
                    <discreteMappingEntry value="T" attributeValue="INHIBITION_OTHER"/>
                    <discreteMappingEntry value="DELTA" attributeValue="ACTIVATION"/>
                    <discreteMappingEntry value="T" attributeValue="INHIBITION_UNCOMPETITIVE"/>
                    <discreteMappingEntry value="DELTA" attributeValue="cofactor"/>
                    <discreteMappingEntry value="DELTA" attributeValue="ACTIVATION_ALLOSTERIC"/>
                    <discreteMappingEntry value="DELTA" attributeValue="right"/>
                    <discreteMappingEntry value="T" attributeValue="INHIBITION_ALLOSTERIC"/>
                    <discreteMappingEntry value="DELTA" attributeValue="controlled"/>
                    <discreteMappingEntry value="CIRCLE" attributeValue="contains"/>
                    <discreteMappingEntry value="T" attributeValue="INHIBITION"/>
                    <discreteMappingEntry value="T" attributeValue="INHIBITION_UNKMECH"/>
                    <discreteMappingEntry value="T" attributeValue="INHIBITION_IRREVERSIBLE"/>
                    <discreteMappingEntry value="T" attributeValue="INHIBITION_COMPETITIVE"/>
                    <discreteMappingEntry value="DELTA" attributeValue="ACTIVATION_UNKMECH"/>
                    <discreteMappingEntry value="DELTA" attributeValue="ACTIVATION_NONALLOSTERIC"/>
                </discreteMapping>
            </visualProperty>
        </edge>
    </visualStyle>
    <visualStyle name="size_rank_0">
        <network>
            <visualProperty name="NETWORK_CENTER_X_LOCATION" default="0.0"/>
            <visualProperty name="NETWORK_CENTER_Y_LOCATION" default="0.0"/>
            <visualProperty name="NETWORK_NODE_SELECTION" default="true"/>
            <visualProperty name="NETWORK_DEPTH" default="0.0"/>
            <visualProperty name="NETWORK_BACKGROUND_PAINT" default="#EBEBEB"/>
            <visualProperty name="NETWORK_SCALE_FACTOR" default="1.0"/>
            <visualProperty name="NETWORK_HEIGHT" default="400.0"/>
            <visualProperty name="NETWORK_WIDTH" default="550.0"/>
            <visualProperty name="NETWORK_SIZE" default="550.0"/>
            <visualProperty name="NETWORK_TITLE" default=""/>
            <visualProperty name="NETWORK_EDGE_SELECTION" default="true"/>
            <visualProperty name="NETWORK_CENTER_Z_LOCATION" default="0.0"/>
        </network>
        <node>
            <dependency name="nodeCustomGraphicsSizeSync" value="true"/>
            <dependency name="nodeSizeLocked" value="true"/>
            <visualProperty name="NODE_Y_LOCATION" default="0.0"/>
            <visualProperty name="COMPOUND_NODE_PADDING" default="10.0"/>
            <visualProperty name="NODE_CUSTOMGRAPHICS_5" default="org.cytoscape.ding.customgraphics.NullCustomGraphics,0,[ Remove Graphics ],"/>
            <visualProperty name="COMPOUND_NODE_SHAPE" default="ROUND_RECTANGLE"/>
            <visualProperty name="NODE_CUSTOMPAINT_9" default="DefaultVisualizableVisualProperty(id=NODE_CUSTOMPAINT_9, name=Node Custom Paint 9)"/>
            <visualProperty name="NODE_CUSTOMGRAPHICS_POSITION_3" default="C,C,c,0.00,0.00"/>
            <visualProperty name="NODE_PAINT" default="#787878"/>
            <visualProperty name="NODE_CUSTOMGRAPHICS_SIZE_9" default="50.0"/>
            <visualProperty name="NODE_CUSTOMGRAPHICS_SIZE_1" default="50.0"/>
            <visualProperty name="NODE_BORDER_PAINT" default="#000000"/>
            <visualProperty name="NODE_CUSTOMGRAPHICS_1" default="org.cytoscape.ding.customgraphics.NullCustomGraphics,0,[ Remove Graphics ],"/>
            <visualProperty name="NODE_CUSTOMGRAPHICS_8" default="org.cytoscape.ding.customgraphics.NullCustomGraphics,0,[ Remove Graphics ],"/>
            <visualProperty name="NODE_TRANSPARENCY" default="255"/>
            <visualProperty name="NODE_CUSTOMGRAPHICS_SIZE_2" default="50.0"/>
            <visualProperty name="NODE_LABEL_POSITION" default="C,C,c,0.00,0.00"/>
            <visualProperty name="NODE_Z_LOCATION" default="0.0"/>
            <visualProperty name="NODE_CUSTOMPAINT_6" default="DefaultVisualizableVisualProperty(id=NODE_CUSTOMPAINT_6, name=Node Custom Paint 6)"/>
            <visualProperty name="NODE_CUSTOMGRAPHICS_POSITION_1" default="C,C,c,0.00,0.00"/>
            <visualProperty name="NODE_DEPTH" default="0.0"/>
            <visualProperty name="NODE_CUSTOMPAINT_2" default="DefaultVisualizableVisualProperty(id=NODE_CUSTOMPAINT_2, name=Node Custom Paint 2)"/>
            <visualProperty name="NODE_CUSTOMGRAPHICS_SIZE_7" default="50.0"/>
            <visualProperty name="NODE_X_LOCATION" default="0.0"/>
            <visualProperty name="NODE_LABEL_FONT_FACE" default="SansSerif.plain,plain,12"/>
            <visualProperty name="NODE_CUSTOMGRAPHICS_9" default="org.cytoscape.ding.customgraphics.NullCustomGraphics,0,[ Remove Graphics ],"/>
            <visualProperty name="NODE_BORDER_TRANSPARENCY" default="255"/>
            <visualProperty name="NODE_CUSTOMGRAPHICS_POSITION_2" default="C,C,c,0.00,0.00"/>
            <visualProperty name="NODE_CUSTOMGRAPHICS_6" default="org.cytoscape.ding.customgraphics.NullCustomGraphics,0,[ Remove Graphics ],"/>
            <visualProperty name="NODE_CUSTOMGRAPHICS_POSITION_6" default="C,C,c,0.00,0.00"/>
            <visualProperty name="NODE_CUSTOMPAINT_7" default="DefaultVisualizableVisualProperty(id=NODE_CUSTOMPAINT_7, name=Node Custom Paint 7)"/>
            <visualProperty name="NODE_LABEL_WIDTH" default="200.0"/>
            <visualProperty name="NODE_SELECTED_PAINT" default="#FFFF00"/>
            <visualProperty name="NODE_FILL_COLOR" default="#CCCCFF"/>
            <visualProperty name="NODE_CUSTOMGRAPHICS_2" default="org.cytoscape.ding.customgraphics.NullCustomGraphics,0,[ Remove Graphics ],"/>
            <visualProperty name="NODE_CUSTOMGRAPHICS_POSITION_4" default="C,C,c,0.00,0.00"/>
            <visualProperty name="NODE_TOOLTIP" default=""/>
            <visualProperty name="NODE_LABEL_TRANSPARENCY" default="255"/>
            <visualProperty name="NODE_WIDTH" default="50.0"/>
            <visualProperty name="NODE_CUSTOMGRAPHICS_POSITION_7" default="C,C,c,0.00,0.00"/>
            <visualProperty name="NODE_SHAPE" default="RECTANGLE"/>
            <visualProperty name="NODE_CUSTOMPAINT_5" default="DefaultVisualizableVisualProperty(id=NODE_CUSTOMPAINT_5, name=Node Custom Paint 5)"/>
            <visualProperty name="NODE_CUSTOMGRAPHICS_POSITION_9" default="C,C,c,0.00,0.00"/>
            <visualProperty name="NODE_CUSTOMGRAPHICS_4" default="org.cytoscape.ding.customgraphics.NullCustomGraphics,0,[ Remove Graphics ],"/>
            <visualProperty name="NODE_CUSTOMGRAPHICS_7" default="org.cytoscape.ding.customgraphics.NullCustomGraphics,0,[ Remove Graphics ],"/>
            <visualProperty name="NODE_CUSTOMGRAPHICS_3" default="org.cytoscape.ding.customgraphics.NullCustomGraphics,0,[ Remove Graphics ],"/>
            <visualProperty name="NODE_CUSTOMPAINT_3" default="DefaultVisualizableVisualProperty(id=NODE_CUSTOMPAINT_3, name=Node Custom Paint 3)"/>
            <visualProperty name="NODE_HEIGHT" default="50.0"/>
            <visualProperty name="NODE_SIZE" default="12.0">
                <continuousMapping attributeType="float" attributeName="diffusion_output__rank">
                    <continuousMappingPoint lesserValue="1.0" greaterValue="39.11245096536507" equalValue="39.11245096536507" attrValue="0.0"/>
                    <continuousMappingPoint lesserValue="13.821692732043733" greaterValue="1.0" equalValue="13.821692732043733" attrValue="99.0"/>
                </continuousMapping>
            </visualProperty>
            <visualProperty name="NODE_CUSTOMPAINT_1" default="DefaultVisualizableVisualProperty(id=NODE_CUSTOMPAINT_1, name=Node Custom Paint 1)"/>
            <visualProperty name="NODE_CUSTOMPAINT_8" default="DefaultVisualizableVisualProperty(id=NODE_CUSTOMPAINT_8, name=Node Custom Paint 8)"/>
            <visualProperty name="NODE_CUSTOMGRAPHICS_POSITION_8" default="C,C,c,0.00,0.00"/>
            <visualProperty name="NODE_SELECTED" default="false"/>
            <visualProperty name="NODE_CUSTOMGRAPHICS_SIZE_8" default="50.0"/>
            <visualProperty name="NODE_LABEL_COLOR" default="#333333"/>
            <visualProperty name="NODE_BORDER_STROKE" default="SOLID"/>
            <visualProperty name="NODE_CUSTOMGRAPHICS_SIZE_5" default="50.0"/>
            <visualProperty name="NODE_CUSTOMGRAPHICS_SIZE_4" default="50.0"/>
            <visualProperty name="NODE_VISIBLE" default="true"/>
            <visualProperty name="NODE_BORDER_WIDTH" default="0.0"/>
            <visualProperty name="NODE_LABEL_FONT_SIZE" default="9"/>
            <visualProperty name="NODE_CUSTOMGRAPHICS_SIZE_6" default="50.0"/>
            <visualProperty name="NODE_NESTED_NETWORK_IMAGE_VISIBLE" default="true"/>
            <visualProperty name="NODE_LABEL" default="">
                <passthroughMapping attributeType="string" attributeName="name"/>
            </visualProperty>
            <visualProperty name="NODE_CUSTOMPAINT_4" default="DefaultVisualizableVisualProperty(id=NODE_CUSTOMPAINT_4, name=Node Custom Paint 4)"/>
            <visualProperty name="NODE_CUSTOMGRAPHICS_SIZE_3" default="50.0"/>
            <visualProperty name="NODE_CUSTOMGRAPHICS_POSITION_5" default="C,C,c,0.00,0.00"/>
        </node>
        <edge>
            <dependency name="arrowColorMatchesEdge" value="false"/>
            <visualProperty name="EDGE_SELECTED" default="false"/>
            <visualProperty name="EDGE_SOURCE_ARROW_UNSELECTED_PAINT" default="#000000"/>
            <visualProperty name="EDGE_UNSELECTED_PAINT" default="#404040"/>
            <visualProperty name="EDGE_TOOLTIP" default=""/>
            <visualProperty name="EDGE_SOURCE_ARROW_SELECTED_PAINT" default="#FFFF00"/>
            <visualProperty name="EDGE_LABEL_TRANSPARENCY" default="255"/>
            <visualProperty name="EDGE_LABEL_FONT_FACE" default="SansSerif.plain,plain,10"/>
            <visualProperty name="EDGE_TARGET_ARROW_SHAPE" default="NONE"/>
            <visualProperty name="EDGE_LABEL_FONT_SIZE" default="10"/>
            <visualProperty name="EDGE_TARGET_ARROW_SIZE" default="6.0"/>
            <visualProperty name="EDGE_VISIBLE" default="true"/>
            <visualProperty name="EDGE_WIDTH" default="2.0"/>
            <visualProperty name="EDGE_TRANSPARENCY" default="255"/>
            <visualProperty name="EDGE_LABEL_WIDTH" default="200.0"/>
            <visualProperty name="EDGE_LABEL_COLOR" default="#000000"/>
            <visualProperty name="EDGE_STROKE_UNSELECTED_PAINT" default="#4C4C4C"/>
            <visualProperty name="EDGE_PAINT" default="#808080"/>
            <visualProperty name="EDGE_CURVED" default="true"/>
            <visualProperty name="EDGE_SOURCE_ARROW_SIZE" default="6.0"/>
            <visualProperty name="EDGE_BEND" default=""/>
            <visualProperty name="EDGE_STROKE_SELECTED_PAINT" default="#FF0000"/>
            <visualProperty name="EDGE_SOURCE_ARROW_SHAPE" default="NONE"/>
            <visualProperty name="EDGE_LABEL" default=""/>
            <visualProperty name="EDGE_SELECTED_PAINT" default="#FF0000"/>
            <visualProperty name="EDGE_LINE_TYPE" default="SOLID"/>
            <visualProperty name="EDGE_TARGET_ARROW_SELECTED_PAINT" default="#FFFF00"/>
            <visualProperty name="EDGE_TARGET_ARROW_UNSELECTED_PAINT" default="#000000"/>
        </edge>
    </visualStyle>
    <visualStyle name="Gradient1">
        <network>
            <visualProperty name="NETWORK_CENTER_X_LOCATION" default="0.0"/>
            <visualProperty name="NETWORK_CENTER_Y_LOCATION" default="0.0"/>
            <visualProperty name="NETWORK_NODE_SELECTION" default="true"/>
            <visualProperty name="NETWORK_DEPTH" default="0.0"/>
            <visualProperty name="NETWORK_BACKGROUND_PAINT" default="#000000"/>
            <visualProperty name="NETWORK_SCALE_FACTOR" default="1.0"/>
            <visualProperty name="NETWORK_HEIGHT" default="400.0"/>
            <visualProperty name="NETWORK_WIDTH" default="550.0"/>
            <visualProperty name="NETWORK_TITLE" default=""/>
            <visualProperty name="NETWORK_EDGE_SELECTION" default="true"/>
            <visualProperty name="NETWORK_CENTER_Z_LOCATION" default="0.0"/>
        </network>
        <node>
            <dependency name="nodeCustomGraphicsSizeSync" value="true"/>
            <dependency name="nodeSizeLocked" value="true"/>
            <visualProperty name="NODE_Y_LOCATION" default="0.0"/>
            <visualProperty name="COMPOUND_NODE_PADDING" default="10.0"/>
            <visualProperty name="NODE_CUSTOMGRAPHICS_5" default="org.cytoscape.ding.customgraphics.NullCustomGraphics,0,[ Remove Graphics ],"/>
            <visualProperty name="COMPOUND_NODE_SHAPE" default="ROUND_RECTANGLE"/>
            <visualProperty name="NODE_CUSTOMGRAPHICS_POSITION_3" default="C,C,c,0.00,0.00"/>
            <visualProperty name="NODE_CUSTOMGRAPHICS_SIZE_9" default="0.0"/>
            <visualProperty name="NODE_CUSTOMGRAPHICS_SIZE_1" default="0.0"/>
            <visualProperty name="NODE_BORDER_PAINT" default="#000000"/>
            <visualProperty name="NODE_CUSTOMGRAPHICS_1" default="org.cytoscape.RadialGradient:{&quot;cy_gradientFractions&quot;:[0.0,0.39688042,1.0],&quot;cy_gradientColors&quot;:[&quot;#FFFFFF&quot;,&quot;#666666&quot;,&quot;#000000&quot;],&quot;cy_center&quot;:{&quot;x&quot;:0.25,&quot;y&quot;:0.2619047619047619}}"/>
            <visualProperty name="NODE_CUSTOMGRAPHICS_8" default="org.cytoscape.ding.customgraphics.NullCustomGraphics,0,[ Remove Graphics ],"/>
            <visualProperty name="NODE_TRANSPARENCY" default="255"/>
            <visualProperty name="NODE_CUSTOMGRAPHICS_SIZE_2" default="0.0"/>
            <visualProperty name="NODE_LABEL_POSITION" default="S,NW,c,0.00,3.00"/>
            <visualProperty name="NODE_Z_LOCATION" default="0.0"/>
            <visualProperty name="NODE_CUSTOMGRAPHICS_POSITION_1" default="C,C,c,0.00,0.00"/>
            <visualProperty name="NODE_DEPTH" default="0.0"/>
            <visualProperty name="NODE_CUSTOMGRAPHICS_SIZE_7" default="0.0"/>
            <visualProperty name="NODE_X_LOCATION" default="0.0"/>
            <visualProperty name="NODE_LABEL_FONT_FACE" default="SansSerif.plain,plain,12"/>
            <visualProperty name="NODE_CUSTOMGRAPHICS_9" default="org.cytoscape.ding.customgraphics.NullCustomGraphics,0,[ Remove Graphics ],"/>
            <visualProperty name="NODE_BORDER_TRANSPARENCY" default="255"/>
            <visualProperty name="NODE_CUSTOMGRAPHICS_POSITION_2" default="C,C,c,0.00,0.00"/>
            <visualProperty name="NODE_CUSTOMGRAPHICS_6" default="org.cytoscape.ding.customgraphics.NullCustomGraphics,0,[ Remove Graphics ],"/>
            <visualProperty name="NODE_CUSTOMGRAPHICS_POSITION_6" default="C,C,c,0.00,0.00"/>
            <visualProperty name="NODE_LABEL_WIDTH" default="200.0"/>
            <visualProperty name="NODE_SELECTED_PAINT" default="#FFFF00"/>
            <visualProperty name="NODE_FILL_COLOR" default="#000000"/>
            <visualProperty name="NODE_CUSTOMGRAPHICS_2" default="org.cytoscape.ding.customgraphics.NullCustomGraphics,0,[ Remove Graphics ],"/>
            <visualProperty name="NODE_CUSTOMGRAPHICS_POSITION_4" default="C,C,c,0.00,0.00"/>
            <visualProperty name="NODE_TOOLTIP" default=""/>
            <visualProperty name="NODE_LABEL_TRANSPARENCY" default="255"/>
            <visualProperty name="NODE_WIDTH" default="60.0"/>
            <visualProperty name="NODE_CUSTOMGRAPHICS_POSITION_7" default="C,C,c,0.00,0.00"/>
            <visualProperty name="NODE_SHAPE" default="ELLIPSE"/>
            <visualProperty name="NODE_CUSTOMGRAPHICS_POSITION_9" default="C,C,c,0.00,0.00"/>
            <visualProperty name="NODE_CUSTOMGRAPHICS_4" default="org.cytoscape.ding.customgraphics.NullCustomGraphics,0,[ Remove Graphics ],"/>
            <visualProperty name="NODE_CUSTOMGRAPHICS_7" default="org.cytoscape.ding.customgraphics.NullCustomGraphics,0,[ Remove Graphics ],"/>
            <visualProperty name="NODE_CUSTOMGRAPHICS_3" default="org.cytoscape.ding.customgraphics.NullCustomGraphics,0,[ Remove Graphics ],"/>
            <visualProperty name="NODE_HEIGHT" default="40.0"/>
            <visualProperty name="NODE_SIZE" default="30.0"/>
            <visualProperty name="NODE_CUSTOMGRAPHICS_POSITION_8" default="C,C,c,0.00,0.00"/>
            <visualProperty name="NODE_SELECTED" default="false"/>
            <visualProperty name="NODE_CUSTOMGRAPHICS_SIZE_8" default="0.0"/>
            <visualProperty name="NODE_LABEL_COLOR" default="#CCCCCC"/>
            <visualProperty name="NODE_BORDER_STROKE" default="SOLID"/>
            <visualProperty name="NODE_CUSTOMGRAPHICS_SIZE_5" default="0.0"/>
            <visualProperty name="NODE_CUSTOMGRAPHICS_SIZE_4" default="0.0"/>
            <visualProperty name="NODE_VISIBLE" default="true"/>
            <visualProperty name="NODE_BORDER_WIDTH" default="0.0"/>
            <visualProperty name="NODE_LABEL_FONT_SIZE" default="8"/>
            <visualProperty name="NODE_CUSTOMGRAPHICS_SIZE_6" default="0.0"/>
            <visualProperty name="NODE_NESTED_NETWORK_IMAGE_VISIBLE" default="true"/>
            <visualProperty name="NODE_LABEL" default="">
                <passthroughMapping attributeType="string" attributeName="name"/>
            </visualProperty>
            <visualProperty name="NODE_CUSTOMGRAPHICS_SIZE_3" default="0.0"/>
            <visualProperty name="NODE_CUSTOMGRAPHICS_POSITION_5" default="C,C,c,0.00,0.00"/>
        </node>
        <edge>
            <dependency name="arrowColorMatchesEdge" value="false"/>
            <visualProperty name="EDGE_SELECTED" default="false"/>
            <visualProperty name="EDGE_SOURCE_ARROW_UNSELECTED_PAINT" default="#000000"/>
            <visualProperty name="EDGE_TOOLTIP" default=""/>
            <visualProperty name="EDGE_SOURCE_ARROW_SELECTED_PAINT" default="#FFFF00"/>
            <visualProperty name="EDGE_LABEL_TRANSPARENCY" default="255"/>
            <visualProperty name="EDGE_LABEL_FONT_FACE" default="SansSerif.plain,plain,10"/>
            <visualProperty name="EDGE_TARGET_ARROW_SHAPE" default="NONE"/>
            <visualProperty name="EDGE_LABEL_FONT_SIZE" default="10"/>
            <visualProperty name="EDGE_TARGET_ARROW_SIZE" default="6.0"/>
            <visualProperty name="EDGE_VISIBLE" default="true"/>
            <visualProperty name="EDGE_WIDTH" default="1.0"/>
            <visualProperty name="EDGE_TRANSPARENCY" default="255"/>
            <visualProperty name="EDGE_LABEL_WIDTH" default="200.0"/>
            <visualProperty name="EDGE_LABEL_COLOR" default="#000000"/>
            <visualProperty name="EDGE_STROKE_UNSELECTED_PAINT" default="#666666"/>
            <visualProperty name="EDGE_CURVED" default="true"/>
            <visualProperty name="EDGE_SOURCE_ARROW_SIZE" default="6.0"/>
            <visualProperty name="EDGE_STROKE_SELECTED_PAINT" default="#FF0000"/>
            <visualProperty name="EDGE_SOURCE_ARROW_SHAPE" default="NONE"/>
            <visualProperty name="EDGE_LABEL" default=""/>
            <visualProperty name="EDGE_LINE_TYPE" default="SOLID"/>
            <visualProperty name="EDGE_TARGET_ARROW_SELECTED_PAINT" default="#FFFF00"/>
            <visualProperty name="EDGE_TARGET_ARROW_UNSELECTED_PAINT" default="#000000"/>
        </edge>
    </visualStyle>
    <visualStyle name="MetFlexExprs">
        <network>
            <visualProperty name="NETWORK_CENTER_X_LOCATION" default="0.0"/>
            <visualProperty name="NETWORK_CENTER_Y_LOCATION" default="0.0"/>
            <visualProperty name="NETWORK_NODE_SELECTION" default="true"/>
            <visualProperty name="NETWORK_DEPTH" default="0.0"/>
            <visualProperty name="NETWORK_BACKGROUND_PAINT" default="#FFFFFF"/>
            <visualProperty name="NETWORK_SCALE_FACTOR" default="1.0"/>
            <visualProperty name="NETWORK_HEIGHT" default="400.0"/>
            <visualProperty name="NETWORK_WIDTH" default="550.0"/>
            <visualProperty name="NETWORK_SIZE" default="550.0"/>
            <visualProperty name="NETWORK_TITLE" default=""/>
            <visualProperty name="NETWORK_EDGE_SELECTION" default="true"/>
            <visualProperty name="NETWORK_CENTER_Z_LOCATION" default="0.0"/>
        </network>
        <node>
            <dependency name="nodeCustomGraphicsSizeSync" value="true"/>
            <dependency name="nodeSizeLocked" value="true"/>
            <visualProperty name="NODE_Y_LOCATION" default="0.0"/>
            <visualProperty name="COMPOUND_NODE_PADDING" default="10.0"/>
            <visualProperty name="NODE_CUSTOMGRAPHICS_5" default="org.cytoscape.ding.customgraphics.NullCustomGraphics,0,[ Remove Graphics ],"/>
            <visualProperty name="COMPOUND_NODE_SHAPE" default="ROUND_RECTANGLE"/>
            <visualProperty name="NODE_CUSTOMPAINT_9" default="DefaultVisualizableVisualProperty(id=NODE_CUSTOMPAINT_9, name=Node Custom Paint 9)"/>
            <visualProperty name="NODE_CUSTOMGRAPHICS_POSITION_3" default="C,C,c,0.00,0.00"/>
            <visualProperty name="NODE_PAINT" default="#787878"/>
            <visualProperty name="NODE_CUSTOMGRAPHICS_SIZE_9" default="50.0"/>
            <visualProperty name="NODE_CUSTOMGRAPHICS_SIZE_1" default="50.0"/>
            <visualProperty name="NODE_BORDER_PAINT" default="#919191"/>
            <visualProperty name="NODE_CUSTOMGRAPHICS_1" default="org.cytoscape.ding.customgraphics.NullCustomGraphics,0,[ Remove Graphics ],"/>
            <visualProperty name="NODE_CUSTOMGRAPHICS_8" default="org.cytoscape.ding.customgraphics.NullCustomGraphics,0,[ Remove Graphics ],"/>
            <visualProperty name="NODE_TRANSPARENCY" default="255"/>
            <visualProperty name="NODE_CUSTOMGRAPHICS_SIZE_2" default="50.0"/>
            <visualProperty name="NODE_LABEL_POSITION" default="C,C,c,0.00,0.00"/>
            <visualProperty name="NODE_Z_LOCATION" default="0.0"/>
            <visualProperty name="NODE_CUSTOMPAINT_6" default="DefaultVisualizableVisualProperty(id=NODE_CUSTOMPAINT_6, name=Node Custom Paint 6)"/>
            <visualProperty name="NODE_CUSTOMGRAPHICS_POSITION_1" default="C,C,c,0.00,0.00"/>
            <visualProperty name="NODE_DEPTH" default="0.0"/>
            <visualProperty name="NODE_CUSTOMPAINT_2" default="DefaultVisualizableVisualProperty(id=NODE_CUSTOMPAINT_2, name=Node Custom Paint 2)"/>
            <visualProperty name="NODE_CUSTOMGRAPHICS_SIZE_7" default="50.0"/>
            <visualProperty name="NODE_X_LOCATION" default="0.0"/>
            <visualProperty name="NODE_LABEL_FONT_FACE" default="SansSerif.plain,plain,12"/>
            <visualProperty name="NODE_CUSTOMGRAPHICS_9" default="org.cytoscape.ding.customgraphics.NullCustomGraphics,0,[ Remove Graphics ],"/>
            <visualProperty name="NODE_BORDER_TRANSPARENCY" default="255"/>
            <visualProperty name="NODE_CUSTOMGRAPHICS_POSITION_2" default="C,C,c,0.00,0.00"/>
            <visualProperty name="NODE_CUSTOMGRAPHICS_6" default="org.cytoscape.ding.customgraphics.NullCustomGraphics,0,[ Remove Graphics ],"/>
            <visualProperty name="NODE_CUSTOMGRAPHICS_POSITION_6" default="C,C,c,0.00,0.00"/>
            <visualProperty name="NODE_CUSTOMPAINT_7" default="DefaultVisualizableVisualProperty(id=NODE_CUSTOMPAINT_7, name=Node Custom Paint 7)"/>
            <visualProperty name="NODE_LABEL_WIDTH" default="200.0"/>
            <visualProperty name="NODE_SELECTED_PAINT" default="#FF0066"/>
            <visualProperty name="NODE_FILL_COLOR" default="#CCCCCC">
                <continuousMapping attributeType="float" attributeName="Log2TPM (endothelial cell of umbilical vein (resting) )">
                    <continuousMappingPoint lesserValue="#FFFFFF" greaterValue="#FFFFFF" equalValue="#FFFFFF" attrValue="0.0"/>
                    <continuousMappingPoint lesserValue="#FFFFFF" greaterValue="#FFFFFF" equalValue="#FFFFFF" attrValue="1.0000000149011612"/>
                    <continuousMappingPoint lesserValue="#009933" greaterValue="#009933" equalValue="#009933" attrValue="10.0"/>
                </continuousMapping>
            </visualProperty>
            <visualProperty name="NODE_CUSTOMGRAPHICS_2" default="org.cytoscape.ding.customgraphics.NullCustomGraphics,0,[ Remove Graphics ],"/>
            <visualProperty name="NODE_CUSTOMGRAPHICS_POSITION_4" default="C,C,c,0.00,0.00"/>
            <visualProperty name="NODE_TOOLTIP" default=""/>
            <visualProperty name="NODE_LABEL_TRANSPARENCY" default="255"/>
            <visualProperty name="NODE_WIDTH" default="50.0"/>
            <visualProperty name="NODE_CUSTOMGRAPHICS_POSITION_7" default="C,C,c,0.00,0.00"/>
            <visualProperty name="NODE_SHAPE" default="ELLIPSE">
                <discreteMapping attributeType="string" attributeName="NodeType">
                    <discreteMappingEntry value="TRIANGLE" attributeValue="Drugs"/>
                    <discreteMappingEntry value="HEXAGON" attributeValue="Metabolite"/>
                    <discreteMappingEntry value="DIAMOND" attributeValue="Process"/>
                    <discreteMappingEntry value="ELLIPSE" attributeValue="Protein"/>
                </discreteMapping>
            </visualProperty>
            <visualProperty name="NODE_CUSTOMPAINT_5" default="DefaultVisualizableVisualProperty(id=NODE_CUSTOMPAINT_5, name=Node Custom Paint 5)"/>
            <visualProperty name="NODE_CUSTOMGRAPHICS_POSITION_9" default="C,C,c,0.00,0.00"/>
            <visualProperty name="NODE_CUSTOMGRAPHICS_4" default="org.cytoscape.ding.customgraphics.NullCustomGraphics,0,[ Remove Graphics ],"/>
            <visualProperty name="NODE_CUSTOMGRAPHICS_7" default="org.cytoscape.ding.customgraphics.NullCustomGraphics,0,[ Remove Graphics ],"/>
            <visualProperty name="NODE_CUSTOMGRAPHICS_3" default="org.cytoscape.ding.customgraphics.NullCustomGraphics,0,[ Remove Graphics ],"/>
            <visualProperty name="NODE_CUSTOMPAINT_3" default="DefaultVisualizableVisualProperty(id=NODE_CUSTOMPAINT_3, name=Node Custom Paint 3)"/>
            <visualProperty name="NODE_HEIGHT" default="50.0"/>
            <visualProperty name="NODE_SIZE" default="65.0"/>
            <visualProperty name="NODE_CUSTOMPAINT_1" default="DefaultVisualizableVisualProperty(id=NODE_CUSTOMPAINT_1, name=Node Custom Paint 1)"/>
            <visualProperty name="NODE_CUSTOMPAINT_8" default="DefaultVisualizableVisualProperty(id=NODE_CUSTOMPAINT_8, name=Node Custom Paint 8)"/>
            <visualProperty name="NODE_CUSTOMGRAPHICS_POSITION_8" default="C,C,c,0.00,0.00"/>
            <visualProperty name="NODE_SELECTED" default="false"/>
            <visualProperty name="NODE_CUSTOMGRAPHICS_SIZE_8" default="50.0"/>
            <visualProperty name="NODE_LABEL_COLOR" default="#000000"/>
            <visualProperty name="NODE_BORDER_STROKE" default="SOLID"/>
            <visualProperty name="NODE_CUSTOMGRAPHICS_SIZE_5" default="50.0"/>
            <visualProperty name="NODE_CUSTOMGRAPHICS_SIZE_4" default="50.0"/>
            <visualProperty name="NODE_VISIBLE" default="true"/>
            <visualProperty name="NODE_BORDER_WIDTH" default="7.0"/>
            <visualProperty name="NODE_LABEL_FONT_SIZE" default="23"/>
            <visualProperty name="NODE_CUSTOMGRAPHICS_SIZE_6" default="50.0"/>
            <visualProperty name="NODE_NESTED_NETWORK_IMAGE_VISIBLE" default="true"/>
            <visualProperty name="NODE_LABEL" default="">
                <passthroughMapping attributeType="string" attributeName="name"/>
            </visualProperty>
            <visualProperty name="NODE_CUSTOMPAINT_4" default="DefaultVisualizableVisualProperty(id=NODE_CUSTOMPAINT_4, name=Node Custom Paint 4)"/>
            <visualProperty name="NODE_CUSTOMGRAPHICS_SIZE_3" default="50.0"/>
            <visualProperty name="NODE_CUSTOMGRAPHICS_POSITION_5" default="C,C,c,0.00,0.00"/>
        </node>
        <edge>
            <dependency name="arrowColorMatchesEdge" value="true"/>
            <visualProperty name="EDGE_SELECTED" default="false"/>
            <visualProperty name="EDGE_SOURCE_ARROW_UNSELECTED_PAINT" default="#000000"/>
            <visualProperty name="EDGE_UNSELECTED_PAINT" default="#CCCCCC">
                <discreteMapping attributeType="string" attributeName="interaction">
                    <discreteMappingEntry value="#FF6666" attributeValue="inhibits"/>
                </discreteMapping>
            </visualProperty>
            <visualProperty name="EDGE_TOOLTIP" default=""/>
            <visualProperty name="EDGE_SOURCE_ARROW_SELECTED_PAINT" default="#FFFF00"/>
            <visualProperty name="EDGE_LABEL_TRANSPARENCY" default="255"/>
            <visualProperty name="EDGE_LABEL_FONT_FACE" default="SansSerif.plain,plain,12"/>
            <visualProperty name="EDGE_TARGET_ARROW_SHAPE" default="DELTA">
                <discreteMapping attributeType="string" attributeName="interaction">
                    <discreteMappingEntry value="T" attributeValue="inhibits"/>
                </discreteMapping>
            </visualProperty>
            <visualProperty name="EDGE_LABEL_FONT_SIZE" default="18"/>
            <visualProperty name="EDGE_TARGET_ARROW_SIZE" default="6.0"/>
            <visualProperty name="EDGE_VISIBLE" default="true"/>
            <visualProperty name="EDGE_WIDTH" default="7.5"/>
            <visualProperty name="EDGE_TRANSPARENCY" default="255"/>
            <visualProperty name="EDGE_LABEL_WIDTH" default="200.0"/>
            <visualProperty name="EDGE_LABEL_COLOR" default="#3399FF"/>
            <visualProperty name="EDGE_STROKE_UNSELECTED_PAINT" default="#969696"/>
            <visualProperty name="EDGE_PAINT" default="#808080"/>
            <visualProperty name="EDGE_CURVED" default="true"/>
            <visualProperty name="EDGE_SOURCE_ARROW_SIZE" default="6.0"/>
            <visualProperty name="EDGE_BEND" default=""/>
            <visualProperty name="EDGE_STROKE_SELECTED_PAINT" default="#FF0000"/>
            <visualProperty name="EDGE_SOURCE_ARROW_SHAPE" default="NONE"/>
            <visualProperty name="EDGE_LABEL" default=""/>
            <visualProperty name="EDGE_SELECTED_PAINT" default="#FF0000"/>
            <visualProperty name="EDGE_LINE_TYPE" default="SOLID"/>
            <visualProperty name="EDGE_TARGET_ARROW_SELECTED_PAINT" default="#FFFF00"/>
            <visualProperty name="EDGE_TARGET_ARROW_UNSELECTED_PAINT" default="#333333"/>
        </edge>
    </visualStyle>
    <visualStyle name="size_rank_2">
        <network>
            <visualProperty name="NETWORK_CENTER_X_LOCATION" default="0.0"/>
            <visualProperty name="NETWORK_CENTER_Y_LOCATION" default="0.0"/>
            <visualProperty name="NETWORK_NODE_SELECTION" default="true"/>
            <visualProperty name="NETWORK_DEPTH" default="0.0"/>
            <visualProperty name="NETWORK_BACKGROUND_PAINT" default="#EBEBEB"/>
            <visualProperty name="NETWORK_SCALE_FACTOR" default="1.0"/>
            <visualProperty name="NETWORK_HEIGHT" default="400.0"/>
            <visualProperty name="NETWORK_WIDTH" default="550.0"/>
            <visualProperty name="NETWORK_SIZE" default="550.0"/>
            <visualProperty name="NETWORK_TITLE" default=""/>
            <visualProperty name="NETWORK_EDGE_SELECTION" default="true"/>
            <visualProperty name="NETWORK_CENTER_Z_LOCATION" default="0.0"/>
        </network>
        <node>
            <dependency name="nodeCustomGraphicsSizeSync" value="true"/>
            <dependency name="nodeSizeLocked" value="true"/>
            <visualProperty name="NODE_Y_LOCATION" default="0.0"/>
            <visualProperty name="COMPOUND_NODE_PADDING" default="10.0"/>
            <visualProperty name="NODE_CUSTOMGRAPHICS_5" default="org.cytoscape.ding.customgraphics.NullCustomGraphics,0,[ Remove Graphics ],"/>
            <visualProperty name="COMPOUND_NODE_SHAPE" default="ROUND_RECTANGLE"/>
            <visualProperty name="NODE_CUSTOMPAINT_9" default="DefaultVisualizableVisualProperty(id=NODE_CUSTOMPAINT_9, name=Node Custom Paint 9)"/>
            <visualProperty name="NODE_CUSTOMGRAPHICS_POSITION_3" default="C,C,c,0.00,0.00"/>
            <visualProperty name="NODE_PAINT" default="#787878"/>
            <visualProperty name="NODE_CUSTOMGRAPHICS_SIZE_9" default="50.0"/>
            <visualProperty name="NODE_CUSTOMGRAPHICS_SIZE_1" default="50.0"/>
            <visualProperty name="NODE_BORDER_PAINT" default="#000000"/>
            <visualProperty name="NODE_CUSTOMGRAPHICS_1" default="org.cytoscape.ding.customgraphics.NullCustomGraphics,0,[ Remove Graphics ],"/>
            <visualProperty name="NODE_CUSTOMGRAPHICS_8" default="org.cytoscape.ding.customgraphics.NullCustomGraphics,0,[ Remove Graphics ],"/>
            <visualProperty name="NODE_TRANSPARENCY" default="255"/>
            <visualProperty name="NODE_CUSTOMGRAPHICS_SIZE_2" default="50.0"/>
            <visualProperty name="NODE_LABEL_POSITION" default="C,C,c,0.00,0.00"/>
            <visualProperty name="NODE_Z_LOCATION" default="0.0"/>
            <visualProperty name="NODE_CUSTOMPAINT_6" default="DefaultVisualizableVisualProperty(id=NODE_CUSTOMPAINT_6, name=Node Custom Paint 6)"/>
            <visualProperty name="NODE_CUSTOMGRAPHICS_POSITION_1" default="C,C,c,0.00,0.00"/>
            <visualProperty name="NODE_DEPTH" default="0.0"/>
            <visualProperty name="NODE_CUSTOMPAINT_2" default="DefaultVisualizableVisualProperty(id=NODE_CUSTOMPAINT_2, name=Node Custom Paint 2)"/>
            <visualProperty name="NODE_CUSTOMGRAPHICS_SIZE_7" default="50.0"/>
            <visualProperty name="NODE_X_LOCATION" default="0.0"/>
            <visualProperty name="NODE_LABEL_FONT_FACE" default="SansSerif.plain,plain,12"/>
            <visualProperty name="NODE_CUSTOMGRAPHICS_9" default="org.cytoscape.ding.customgraphics.NullCustomGraphics,0,[ Remove Graphics ],"/>
            <visualProperty name="NODE_BORDER_TRANSPARENCY" default="255"/>
            <visualProperty name="NODE_CUSTOMGRAPHICS_POSITION_2" default="C,C,c,0.00,0.00"/>
            <visualProperty name="NODE_CUSTOMGRAPHICS_6" default="org.cytoscape.ding.customgraphics.NullCustomGraphics,0,[ Remove Graphics ],"/>
            <visualProperty name="NODE_CUSTOMGRAPHICS_POSITION_6" default="C,C,c,0.00,0.00"/>
            <visualProperty name="NODE_CUSTOMPAINT_7" default="DefaultVisualizableVisualProperty(id=NODE_CUSTOMPAINT_7, name=Node Custom Paint 7)"/>
            <visualProperty name="NODE_LABEL_WIDTH" default="200.0"/>
            <visualProperty name="NODE_SELECTED_PAINT" default="#FFFF00"/>
            <visualProperty name="NODE_FILL_COLOR" default="#CCCCFF"/>
            <visualProperty name="NODE_CUSTOMGRAPHICS_2" default="org.cytoscape.ding.customgraphics.NullCustomGraphics,0,[ Remove Graphics ],"/>
            <visualProperty name="NODE_CUSTOMGRAPHICS_POSITION_4" default="C,C,c,0.00,0.00"/>
            <visualProperty name="NODE_TOOLTIP" default=""/>
            <visualProperty name="NODE_LABEL_TRANSPARENCY" default="255"/>
            <visualProperty name="NODE_WIDTH" default="50.0"/>
            <visualProperty name="NODE_CUSTOMGRAPHICS_POSITION_7" default="C,C,c,0.00,0.00"/>
            <visualProperty name="NODE_SHAPE" default="RECTANGLE"/>
            <visualProperty name="NODE_CUSTOMPAINT_5" default="DefaultVisualizableVisualProperty(id=NODE_CUSTOMPAINT_5, name=Node Custom Paint 5)"/>
            <visualProperty name="NODE_CUSTOMGRAPHICS_POSITION_9" default="C,C,c,0.00,0.00"/>
            <visualProperty name="NODE_CUSTOMGRAPHICS_4" default="org.cytoscape.ding.customgraphics.NullCustomGraphics,0,[ Remove Graphics ],"/>
            <visualProperty name="NODE_CUSTOMGRAPHICS_7" default="org.cytoscape.ding.customgraphics.NullCustomGraphics,0,[ Remove Graphics ],"/>
            <visualProperty name="NODE_CUSTOMGRAPHICS_3" default="org.cytoscape.ding.customgraphics.NullCustomGraphics,0,[ Remove Graphics ],"/>
            <visualProperty name="NODE_CUSTOMPAINT_3" default="DefaultVisualizableVisualProperty(id=NODE_CUSTOMPAINT_3, name=Node Custom Paint 3)"/>
            <visualProperty name="NODE_HEIGHT" default="50.0"/>
            <visualProperty name="NODE_SIZE" default="12.0">
                <continuousMapping attributeType="float" attributeName="diffusion_output__rank">
                    <continuousMappingPoint lesserValue="1.0" greaterValue="39.11245096536507" equalValue="39.11245096536507" attrValue="0.0"/>
                    <continuousMappingPoint lesserValue="13.821692732043733" greaterValue="1.0" equalValue="13.821692732043733" attrValue="99.0"/>
                </continuousMapping>
            </visualProperty>
            <visualProperty name="NODE_CUSTOMPAINT_1" default="DefaultVisualizableVisualProperty(id=NODE_CUSTOMPAINT_1, name=Node Custom Paint 1)"/>
            <visualProperty name="NODE_CUSTOMPAINT_8" default="DefaultVisualizableVisualProperty(id=NODE_CUSTOMPAINT_8, name=Node Custom Paint 8)"/>
            <visualProperty name="NODE_CUSTOMGRAPHICS_POSITION_8" default="C,C,c,0.00,0.00"/>
            <visualProperty name="NODE_SELECTED" default="false"/>
            <visualProperty name="NODE_CUSTOMGRAPHICS_SIZE_8" default="50.0"/>
            <visualProperty name="NODE_LABEL_COLOR" default="#333333"/>
            <visualProperty name="NODE_BORDER_STROKE" default="SOLID"/>
            <visualProperty name="NODE_CUSTOMGRAPHICS_SIZE_5" default="50.0"/>
            <visualProperty name="NODE_CUSTOMGRAPHICS_SIZE_4" default="50.0"/>
            <visualProperty name="NODE_VISIBLE" default="true"/>
            <visualProperty name="NODE_BORDER_WIDTH" default="0.0"/>
            <visualProperty name="NODE_LABEL_FONT_SIZE" default="9"/>
            <visualProperty name="NODE_CUSTOMGRAPHICS_SIZE_6" default="50.0"/>
            <visualProperty name="NODE_NESTED_NETWORK_IMAGE_VISIBLE" default="true"/>
            <visualProperty name="NODE_LABEL" default="">
                <passthroughMapping attributeType="string" attributeName="name"/>
            </visualProperty>
            <visualProperty name="NODE_CUSTOMPAINT_4" default="DefaultVisualizableVisualProperty(id=NODE_CUSTOMPAINT_4, name=Node Custom Paint 4)"/>
            <visualProperty name="NODE_CUSTOMGRAPHICS_SIZE_3" default="50.0"/>
            <visualProperty name="NODE_CUSTOMGRAPHICS_POSITION_5" default="C,C,c,0.00,0.00"/>
        </node>
        <edge>
            <dependency name="arrowColorMatchesEdge" value="false"/>
            <visualProperty name="EDGE_SELECTED" default="false"/>
            <visualProperty name="EDGE_SOURCE_ARROW_UNSELECTED_PAINT" default="#000000"/>
            <visualProperty name="EDGE_UNSELECTED_PAINT" default="#404040"/>
            <visualProperty name="EDGE_TOOLTIP" default=""/>
            <visualProperty name="EDGE_SOURCE_ARROW_SELECTED_PAINT" default="#FFFF00"/>
            <visualProperty name="EDGE_LABEL_TRANSPARENCY" default="255"/>
            <visualProperty name="EDGE_LABEL_FONT_FACE" default="SansSerif.plain,plain,10"/>
            <visualProperty name="EDGE_TARGET_ARROW_SHAPE" default="NONE"/>
            <visualProperty name="EDGE_LABEL_FONT_SIZE" default="10"/>
            <visualProperty name="EDGE_TARGET_ARROW_SIZE" default="6.0"/>
            <visualProperty name="EDGE_VISIBLE" default="true"/>
            <visualProperty name="EDGE_WIDTH" default="2.0"/>
            <visualProperty name="EDGE_TRANSPARENCY" default="255"/>
            <visualProperty name="EDGE_LABEL_WIDTH" default="200.0"/>
            <visualProperty name="EDGE_LABEL_COLOR" default="#000000"/>
            <visualProperty name="EDGE_STROKE_UNSELECTED_PAINT" default="#4C4C4C"/>
            <visualProperty name="EDGE_PAINT" default="#808080"/>
            <visualProperty name="EDGE_CURVED" default="true"/>
            <visualProperty name="EDGE_SOURCE_ARROW_SIZE" default="6.0"/>
            <visualProperty name="EDGE_BEND" default=""/>
            <visualProperty name="EDGE_STROKE_SELECTED_PAINT" default="#FF0000"/>
            <visualProperty name="EDGE_SOURCE_ARROW_SHAPE" default="NONE"/>
            <visualProperty name="EDGE_LABEL" default=""/>
            <visualProperty name="EDGE_SELECTED_PAINT" default="#FF0000"/>
            <visualProperty name="EDGE_LINE_TYPE" default="SOLID"/>
            <visualProperty name="EDGE_TARGET_ARROW_SELECTED_PAINT" default="#FFFF00"/>
            <visualProperty name="EDGE_TARGET_ARROW_UNSELECTED_PAINT" default="#000000"/>
        </edge>
    </visualStyle>
    <visualStyle name="MetFlexExprsBioSB2018">
        <network>
            <visualProperty name="NETWORK_CENTER_X_LOCATION" default="0.0"/>
            <visualProperty name="NETWORK_CENTER_Y_LOCATION" default="0.0"/>
            <visualProperty name="NETWORK_NODE_SELECTION" default="true"/>
            <visualProperty name="NETWORK_DEPTH" default="0.0"/>
            <visualProperty name="NETWORK_BACKGROUND_PAINT" default="#FFFFFF"/>
            <visualProperty name="NETWORK_SCALE_FACTOR" default="1.0"/>
            <visualProperty name="NETWORK_HEIGHT" default="400.0"/>
            <visualProperty name="NETWORK_WIDTH" default="550.0"/>
            <visualProperty name="NETWORK_SIZE" default="550.0"/>
            <visualProperty name="NETWORK_TITLE" default=""/>
            <visualProperty name="NETWORK_EDGE_SELECTION" default="true"/>
            <visualProperty name="NETWORK_CENTER_Z_LOCATION" default="0.0"/>
        </network>
        <node>
            <dependency name="nodeCustomGraphicsSizeSync" value="true"/>
            <dependency name="nodeSizeLocked" value="true"/>
            <visualProperty name="NODE_Y_LOCATION" default="0.0"/>
            <visualProperty name="COMPOUND_NODE_PADDING" default="10.0"/>
            <visualProperty name="NODE_CUSTOMGRAPHICS_5" default="org.cytoscape.ding.customgraphics.NullCustomGraphics,0,[ Remove Graphics ],"/>
            <visualProperty name="COMPOUND_NODE_SHAPE" default="ROUND_RECTANGLE"/>
            <visualProperty name="NODE_CUSTOMPAINT_9" default="DefaultVisualizableVisualProperty(id=NODE_CUSTOMPAINT_9, name=Node Custom Paint 9)"/>
            <visualProperty name="NODE_CUSTOMGRAPHICS_POSITION_3" default="C,C,c,0.00,0.00"/>
            <visualProperty name="NODE_PAINT" default="#787878"/>
            <visualProperty name="NODE_CUSTOMGRAPHICS_SIZE_9" default="50.0"/>
            <visualProperty name="NODE_CUSTOMGRAPHICS_SIZE_1" default="50.0"/>
            <visualProperty name="NODE_BORDER_PAINT" default="#919191"/>
            <visualProperty name="NODE_CUSTOMGRAPHICS_1" default="org.cytoscape.ding.customgraphics.NullCustomGraphics,0,[ Remove Graphics ],"/>
            <visualProperty name="NODE_CUSTOMGRAPHICS_8" default="org.cytoscape.ding.customgraphics.NullCustomGraphics,0,[ Remove Graphics ],"/>
            <visualProperty name="NODE_TRANSPARENCY" default="255"/>
            <visualProperty name="NODE_CUSTOMGRAPHICS_SIZE_2" default="50.0"/>
            <visualProperty name="NODE_LABEL_POSITION" default="C,C,c,0.00,0.00"/>
            <visualProperty name="NODE_Z_LOCATION" default="0.0"/>
            <visualProperty name="NODE_CUSTOMPAINT_6" default="DefaultVisualizableVisualProperty(id=NODE_CUSTOMPAINT_6, name=Node Custom Paint 6)"/>
            <visualProperty name="NODE_CUSTOMGRAPHICS_POSITION_1" default="C,C,c,0.00,0.00"/>
            <visualProperty name="NODE_DEPTH" default="0.0"/>
            <visualProperty name="NODE_CUSTOMPAINT_2" default="DefaultVisualizableVisualProperty(id=NODE_CUSTOMPAINT_2, name=Node Custom Paint 2)"/>
            <visualProperty name="NODE_CUSTOMGRAPHICS_SIZE_7" default="50.0"/>
            <visualProperty name="NODE_X_LOCATION" default="0.0"/>
            <visualProperty name="NODE_LABEL_FONT_FACE" default="Arial Bold,plain,12"/>
            <visualProperty name="NODE_CUSTOMGRAPHICS_9" default="org.cytoscape.ding.customgraphics.NullCustomGraphics,0,[ Remove Graphics ],"/>
            <visualProperty name="NODE_BORDER_TRANSPARENCY" default="255"/>
            <visualProperty name="NODE_CUSTOMGRAPHICS_POSITION_2" default="C,C,c,0.00,0.00"/>
            <visualProperty name="NODE_CUSTOMGRAPHICS_6" default="org.cytoscape.ding.customgraphics.NullCustomGraphics,0,[ Remove Graphics ],"/>
            <visualProperty name="NODE_CUSTOMGRAPHICS_POSITION_6" default="C,C,c,0.00,0.00"/>
            <visualProperty name="NODE_CUSTOMPAINT_7" default="DefaultVisualizableVisualProperty(id=NODE_CUSTOMPAINT_7, name=Node Custom Paint 7)"/>
            <visualProperty name="NODE_LABEL_WIDTH" default="200.0"/>
            <visualProperty name="NODE_SELECTED_PAINT" default="#FF0066"/>
            <visualProperty name="NODE_FILL_COLOR" default="#CCCCCC">
                <continuousMapping attributeType="float" attributeName="Log2 TPM SAT">
                    <continuousMappingPoint lesserValue="#FFFFFF" greaterValue="#FFFFFF" equalValue="#FFFFFF" attrValue="0.0"/>
                    <continuousMappingPoint lesserValue="#FFFFFF" greaterValue="#FFFFFF" equalValue="#FFFFFF" attrValue="1.0000000149011612"/>
                    <continuousMappingPoint lesserValue="#009933" greaterValue="#009933" equalValue="#009933" attrValue="10.0"/>
                </continuousMapping>
            </visualProperty>
            <visualProperty name="NODE_CUSTOMGRAPHICS_2" default="org.cytoscape.ding.customgraphics.NullCustomGraphics,0,[ Remove Graphics ],"/>
            <visualProperty name="NODE_CUSTOMGRAPHICS_POSITION_4" default="C,C,c,0.00,0.00"/>
            <visualProperty name="NODE_TOOLTIP" default=""/>
            <visualProperty name="NODE_LABEL_TRANSPARENCY" default="255"/>
            <visualProperty name="NODE_WIDTH" default="50.0"/>
            <visualProperty name="NODE_CUSTOMGRAPHICS_POSITION_7" default="C,C,c,0.00,0.00"/>
            <visualProperty name="NODE_SHAPE" default="ELLIPSE">
                <discreteMapping attributeType="string" attributeName="NodeType">
                    <discreteMappingEntry value="TRIANGLE" attributeValue="Drugs"/>
                    <discreteMappingEntry value="HEXAGON" attributeValue="Metabolite"/>
                    <discreteMappingEntry value="DIAMOND" attributeValue="Process"/>
                    <discreteMappingEntry value="ELLIPSE" attributeValue="Protein"/>
                </discreteMapping>
            </visualProperty>
            <visualProperty name="NODE_CUSTOMPAINT_5" default="DefaultVisualizableVisualProperty(id=NODE_CUSTOMPAINT_5, name=Node Custom Paint 5)"/>
            <visualProperty name="NODE_CUSTOMGRAPHICS_POSITION_9" default="C,C,c,0.00,0.00"/>
            <visualProperty name="NODE_CUSTOMGRAPHICS_4" default="org.cytoscape.ding.customgraphics.NullCustomGraphics,0,[ Remove Graphics ],"/>
            <visualProperty name="NODE_CUSTOMGRAPHICS_7" default="org.cytoscape.ding.customgraphics.NullCustomGraphics,0,[ Remove Graphics ],"/>
            <visualProperty name="NODE_CUSTOMGRAPHICS_3" default="org.cytoscape.ding.customgraphics.NullCustomGraphics,0,[ Remove Graphics ],"/>
            <visualProperty name="NODE_CUSTOMPAINT_3" default="DefaultVisualizableVisualProperty(id=NODE_CUSTOMPAINT_3, name=Node Custom Paint 3)"/>
            <visualProperty name="NODE_HEIGHT" default="50.0"/>
            <visualProperty name="NODE_SIZE" default="65.0"/>
            <visualProperty name="NODE_CUSTOMPAINT_1" default="DefaultVisualizableVisualProperty(id=NODE_CUSTOMPAINT_1, name=Node Custom Paint 1)"/>
            <visualProperty name="NODE_CUSTOMPAINT_8" default="DefaultVisualizableVisualProperty(id=NODE_CUSTOMPAINT_8, name=Node Custom Paint 8)"/>
            <visualProperty name="NODE_CUSTOMGRAPHICS_POSITION_8" default="C,C,c,0.00,0.00"/>
            <visualProperty name="NODE_SELECTED" default="false"/>
            <visualProperty name="NODE_CUSTOMGRAPHICS_SIZE_8" default="50.0"/>
            <visualProperty name="NODE_LABEL_COLOR" default="#000000"/>
            <visualProperty name="NODE_BORDER_STROKE" default="SOLID"/>
            <visualProperty name="NODE_CUSTOMGRAPHICS_SIZE_5" default="50.0"/>
            <visualProperty name="NODE_CUSTOMGRAPHICS_SIZE_4" default="50.0"/>
            <visualProperty name="NODE_VISIBLE" default="true"/>
            <visualProperty name="NODE_BORDER_WIDTH" default="7.0"/>
            <visualProperty name="NODE_LABEL_FONT_SIZE" default="22"/>
            <visualProperty name="NODE_CUSTOMGRAPHICS_SIZE_6" default="50.0"/>
            <visualProperty name="NODE_NESTED_NETWORK_IMAGE_VISIBLE" default="true"/>
            <visualProperty name="NODE_LABEL" default="">
                <passthroughMapping attributeType="string" attributeName="name"/>
            </visualProperty>
            <visualProperty name="NODE_CUSTOMPAINT_4" default="DefaultVisualizableVisualProperty(id=NODE_CUSTOMPAINT_4, name=Node Custom Paint 4)"/>
            <visualProperty name="NODE_CUSTOMGRAPHICS_SIZE_3" default="50.0"/>
            <visualProperty name="NODE_CUSTOMGRAPHICS_POSITION_5" default="C,C,c,0.00,0.00"/>
        </node>
        <edge>
            <dependency name="arrowColorMatchesEdge" value="true"/>
            <visualProperty name="EDGE_SELECTED" default="false"/>
            <visualProperty name="EDGE_SOURCE_ARROW_UNSELECTED_PAINT" default="#000000"/>
            <visualProperty name="EDGE_UNSELECTED_PAINT" default="#CCCCCC">
                <discreteMapping attributeType="string" attributeName="interaction">
                    <discreteMappingEntry value="#FF6666" attributeValue="inhibits"/>
                </discreteMapping>
            </visualProperty>
            <visualProperty name="EDGE_TOOLTIP" default=""/>
            <visualProperty name="EDGE_SOURCE_ARROW_SELECTED_PAINT" default="#FFFF00"/>
            <visualProperty name="EDGE_LABEL_TRANSPARENCY" default="255"/>
            <visualProperty name="EDGE_LABEL_FONT_FACE" default="SansSerif.plain,plain,12"/>
            <visualProperty name="EDGE_TARGET_ARROW_SHAPE" default="DELTA">
                <discreteMapping attributeType="string" attributeName="interaction">
                    <discreteMappingEntry value="T" attributeValue="inhibits"/>
                </discreteMapping>
            </visualProperty>
            <visualProperty name="EDGE_LABEL_FONT_SIZE" default="18"/>
            <visualProperty name="EDGE_TARGET_ARROW_SIZE" default="12.0"/>
            <visualProperty name="EDGE_VISIBLE" default="true"/>
            <visualProperty name="EDGE_WIDTH" default="7.5"/>
            <visualProperty name="EDGE_TRANSPARENCY" default="255"/>
            <visualProperty name="EDGE_LABEL_WIDTH" default="200.0"/>
            <visualProperty name="EDGE_LABEL_COLOR" default="#3399FF"/>
            <visualProperty name="EDGE_STROKE_UNSELECTED_PAINT" default="#969696"/>
            <visualProperty name="EDGE_PAINT" default="#808080"/>
            <visualProperty name="EDGE_CURVED" default="true"/>
            <visualProperty name="EDGE_SOURCE_ARROW_SIZE" default="6.0"/>
            <visualProperty name="EDGE_BEND" default=""/>
            <visualProperty name="EDGE_STROKE_SELECTED_PAINT" default="#FF0000"/>
            <visualProperty name="EDGE_SOURCE_ARROW_SHAPE" default="NONE"/>
            <visualProperty name="EDGE_LABEL" default=""/>
            <visualProperty name="EDGE_SELECTED_PAINT" default="#FF0000"/>
            <visualProperty name="EDGE_LINE_TYPE" default="SOLID"/>
            <visualProperty name="EDGE_TARGET_ARROW_SELECTED_PAINT" default="#FFFF00"/>
            <visualProperty name="EDGE_TARGET_ARROW_UNSELECTED_PAINT" default="#333333"/>
        </edge>
    </visualStyle>
    <visualStyle name="size_rank_3">
        <network>
            <visualProperty name="NETWORK_CENTER_X_LOCATION" default="0.0"/>
            <visualProperty name="NETWORK_CENTER_Y_LOCATION" default="0.0"/>
            <visualProperty name="NETWORK_NODE_SELECTION" default="true"/>
            <visualProperty name="NETWORK_DEPTH" default="0.0"/>
            <visualProperty name="NETWORK_BACKGROUND_PAINT" default="#EBEBEB"/>
            <visualProperty name="NETWORK_SCALE_FACTOR" default="1.0"/>
            <visualProperty name="NETWORK_HEIGHT" default="400.0"/>
            <visualProperty name="NETWORK_WIDTH" default="550.0"/>
            <visualProperty name="NETWORK_SIZE" default="550.0"/>
            <visualProperty name="NETWORK_TITLE" default=""/>
            <visualProperty name="NETWORK_EDGE_SELECTION" default="true"/>
            <visualProperty name="NETWORK_CENTER_Z_LOCATION" default="0.0"/>
        </network>
        <node>
            <dependency name="nodeCustomGraphicsSizeSync" value="true"/>
            <dependency name="nodeSizeLocked" value="true"/>
            <visualProperty name="NODE_Y_LOCATION" default="0.0"/>
            <visualProperty name="COMPOUND_NODE_PADDING" default="10.0"/>
            <visualProperty name="NODE_CUSTOMGRAPHICS_5" default="org.cytoscape.ding.customgraphics.NullCustomGraphics,0,[ Remove Graphics ],"/>
            <visualProperty name="COMPOUND_NODE_SHAPE" default="ROUND_RECTANGLE"/>
            <visualProperty name="NODE_CUSTOMPAINT_9" default="DefaultVisualizableVisualProperty(id=NODE_CUSTOMPAINT_9, name=Node Custom Paint 9)"/>
            <visualProperty name="NODE_CUSTOMGRAPHICS_POSITION_3" default="C,C,c,0.00,0.00"/>
            <visualProperty name="NODE_PAINT" default="#787878"/>
            <visualProperty name="NODE_CUSTOMGRAPHICS_SIZE_9" default="50.0"/>
            <visualProperty name="NODE_CUSTOMGRAPHICS_SIZE_1" default="50.0"/>
            <visualProperty name="NODE_BORDER_PAINT" default="#000000"/>
            <visualProperty name="NODE_CUSTOMGRAPHICS_1" default="org.cytoscape.ding.customgraphics.NullCustomGraphics,0,[ Remove Graphics ],"/>
            <visualProperty name="NODE_CUSTOMGRAPHICS_8" default="org.cytoscape.ding.customgraphics.NullCustomGraphics,0,[ Remove Graphics ],"/>
            <visualProperty name="NODE_TRANSPARENCY" default="255"/>
            <visualProperty name="NODE_CUSTOMGRAPHICS_SIZE_2" default="50.0"/>
            <visualProperty name="NODE_LABEL_POSITION" default="C,C,c,0.00,0.00"/>
            <visualProperty name="NODE_Z_LOCATION" default="0.0"/>
            <visualProperty name="NODE_CUSTOMPAINT_6" default="DefaultVisualizableVisualProperty(id=NODE_CUSTOMPAINT_6, name=Node Custom Paint 6)"/>
            <visualProperty name="NODE_CUSTOMGRAPHICS_POSITION_1" default="C,C,c,0.00,0.00"/>
            <visualProperty name="NODE_DEPTH" default="0.0"/>
            <visualProperty name="NODE_CUSTOMPAINT_2" default="DefaultVisualizableVisualProperty(id=NODE_CUSTOMPAINT_2, name=Node Custom Paint 2)"/>
            <visualProperty name="NODE_CUSTOMGRAPHICS_SIZE_7" default="50.0"/>
            <visualProperty name="NODE_X_LOCATION" default="0.0"/>
            <visualProperty name="NODE_LABEL_FONT_FACE" default="SansSerif.plain,plain,12"/>
            <visualProperty name="NODE_CUSTOMGRAPHICS_9" default="org.cytoscape.ding.customgraphics.NullCustomGraphics,0,[ Remove Graphics ],"/>
            <visualProperty name="NODE_BORDER_TRANSPARENCY" default="255"/>
            <visualProperty name="NODE_CUSTOMGRAPHICS_POSITION_2" default="C,C,c,0.00,0.00"/>
            <visualProperty name="NODE_CUSTOMGRAPHICS_6" default="org.cytoscape.ding.customgraphics.NullCustomGraphics,0,[ Remove Graphics ],"/>
            <visualProperty name="NODE_CUSTOMGRAPHICS_POSITION_6" default="C,C,c,0.00,0.00"/>
            <visualProperty name="NODE_CUSTOMPAINT_7" default="DefaultVisualizableVisualProperty(id=NODE_CUSTOMPAINT_7, name=Node Custom Paint 7)"/>
            <visualProperty name="NODE_LABEL_WIDTH" default="200.0"/>
            <visualProperty name="NODE_SELECTED_PAINT" default="#FFFF00"/>
            <visualProperty name="NODE_FILL_COLOR" default="#CCCCFF"/>
            <visualProperty name="NODE_CUSTOMGRAPHICS_2" default="org.cytoscape.ding.customgraphics.NullCustomGraphics,0,[ Remove Graphics ],"/>
            <visualProperty name="NODE_CUSTOMGRAPHICS_POSITION_4" default="C,C,c,0.00,0.00"/>
            <visualProperty name="NODE_TOOLTIP" default=""/>
            <visualProperty name="NODE_LABEL_TRANSPARENCY" default="255"/>
            <visualProperty name="NODE_WIDTH" default="50.0"/>
            <visualProperty name="NODE_CUSTOMGRAPHICS_POSITION_7" default="C,C,c,0.00,0.00"/>
            <visualProperty name="NODE_SHAPE" default="RECTANGLE"/>
            <visualProperty name="NODE_CUSTOMPAINT_5" default="DefaultVisualizableVisualProperty(id=NODE_CUSTOMPAINT_5, name=Node Custom Paint 5)"/>
            <visualProperty name="NODE_CUSTOMGRAPHICS_POSITION_9" default="C,C,c,0.00,0.00"/>
            <visualProperty name="NODE_CUSTOMGRAPHICS_4" default="org.cytoscape.ding.customgraphics.NullCustomGraphics,0,[ Remove Graphics ],"/>
            <visualProperty name="NODE_CUSTOMGRAPHICS_7" default="org.cytoscape.ding.customgraphics.NullCustomGraphics,0,[ Remove Graphics ],"/>
            <visualProperty name="NODE_CUSTOMGRAPHICS_3" default="org.cytoscape.ding.customgraphics.NullCustomGraphics,0,[ Remove Graphics ],"/>
            <visualProperty name="NODE_CUSTOMPAINT_3" default="DefaultVisualizableVisualProperty(id=NODE_CUSTOMPAINT_3, name=Node Custom Paint 3)"/>
            <visualProperty name="NODE_HEIGHT" default="50.0"/>
            <visualProperty name="NODE_SIZE" default="12.0">
                <continuousMapping attributeType="float" attributeName="diffusion_output__rank">
                    <continuousMappingPoint lesserValue="1.0" greaterValue="39.11245096536507" equalValue="39.11245096536507" attrValue="0.0"/>
                    <continuousMappingPoint lesserValue="13.821692732043733" greaterValue="1.0" equalValue="13.821692732043733" attrValue="99.0"/>
                </continuousMapping>
            </visualProperty>
            <visualProperty name="NODE_CUSTOMPAINT_1" default="DefaultVisualizableVisualProperty(id=NODE_CUSTOMPAINT_1, name=Node Custom Paint 1)"/>
            <visualProperty name="NODE_CUSTOMPAINT_8" default="DefaultVisualizableVisualProperty(id=NODE_CUSTOMPAINT_8, name=Node Custom Paint 8)"/>
            <visualProperty name="NODE_CUSTOMGRAPHICS_POSITION_8" default="C,C,c,0.00,0.00"/>
            <visualProperty name="NODE_SELECTED" default="false"/>
            <visualProperty name="NODE_CUSTOMGRAPHICS_SIZE_8" default="50.0"/>
            <visualProperty name="NODE_LABEL_COLOR" default="#333333"/>
            <visualProperty name="NODE_BORDER_STROKE" default="SOLID"/>
            <visualProperty name="NODE_CUSTOMGRAPHICS_SIZE_5" default="50.0"/>
            <visualProperty name="NODE_CUSTOMGRAPHICS_SIZE_4" default="50.0"/>
            <visualProperty name="NODE_VISIBLE" default="true"/>
            <visualProperty name="NODE_BORDER_WIDTH" default="0.0"/>
            <visualProperty name="NODE_LABEL_FONT_SIZE" default="9"/>
            <visualProperty name="NODE_CUSTOMGRAPHICS_SIZE_6" default="50.0"/>
            <visualProperty name="NODE_NESTED_NETWORK_IMAGE_VISIBLE" default="true"/>
            <visualProperty name="NODE_LABEL" default="">
                <passthroughMapping attributeType="string" attributeName="name"/>
            </visualProperty>
            <visualProperty name="NODE_CUSTOMPAINT_4" default="DefaultVisualizableVisualProperty(id=NODE_CUSTOMPAINT_4, name=Node Custom Paint 4)"/>
            <visualProperty name="NODE_CUSTOMGRAPHICS_SIZE_3" default="50.0"/>
            <visualProperty name="NODE_CUSTOMGRAPHICS_POSITION_5" default="C,C,c,0.00,0.00"/>
        </node>
        <edge>
            <dependency name="arrowColorMatchesEdge" value="false"/>
            <visualProperty name="EDGE_SELECTED" default="false"/>
            <visualProperty name="EDGE_SOURCE_ARROW_UNSELECTED_PAINT" default="#000000"/>
            <visualProperty name="EDGE_UNSELECTED_PAINT" default="#404040"/>
            <visualProperty name="EDGE_TOOLTIP" default=""/>
            <visualProperty name="EDGE_SOURCE_ARROW_SELECTED_PAINT" default="#FFFF00"/>
            <visualProperty name="EDGE_LABEL_TRANSPARENCY" default="255"/>
            <visualProperty name="EDGE_LABEL_FONT_FACE" default="SansSerif.plain,plain,10"/>
            <visualProperty name="EDGE_TARGET_ARROW_SHAPE" default="NONE"/>
            <visualProperty name="EDGE_LABEL_FONT_SIZE" default="10"/>
            <visualProperty name="EDGE_VISIBLE" default="true"/>
            <visualProperty name="EDGE_WIDTH" default="2.0"/>
            <visualProperty name="EDGE_TRANSPARENCY" default="255"/>
            <visualProperty name="EDGE_LABEL_WIDTH" default="200.0"/>
            <visualProperty name="EDGE_LABEL_COLOR" default="#000000"/>
            <visualProperty name="EDGE_STROKE_UNSELECTED_PAINT" default="#4C4C4C"/>
            <visualProperty name="EDGE_PAINT" default="#808080"/>
            <visualProperty name="EDGE_CURVED" default="true"/>
            <visualProperty name="EDGE_BEND" default=""/>
            <visualProperty name="EDGE_STROKE_SELECTED_PAINT" default="#FF0000"/>
            <visualProperty name="EDGE_SOURCE_ARROW_SHAPE" default="NONE"/>
            <visualProperty name="EDGE_LABEL" default=""/>
            <visualProperty name="EDGE_SELECTED_PAINT" default="#FF0000"/>
            <visualProperty name="EDGE_LINE_TYPE" default="SOLID"/>
            <visualProperty name="EDGE_TARGET_ARROW_SELECTED_PAINT" default="#FFFF00"/>
            <visualProperty name="EDGE_TARGET_ARROW_UNSELECTED_PAINT" default="#000000"/>
        </edge>
    </visualStyle>
    <visualStyle name="Ripple">
        <network>
            <visualProperty name="NETWORK_CENTER_X_LOCATION" default="0.0"/>
            <visualProperty name="NETWORK_CENTER_Y_LOCATION" default="0.0"/>
            <visualProperty name="NETWORK_NODE_SELECTION" default="true"/>
            <visualProperty name="NETWORK_DEPTH" default="0.0"/>
            <visualProperty name="NETWORK_BACKGROUND_PAINT" default="#FFFFFF"/>
            <visualProperty name="NETWORK_SCALE_FACTOR" default="1.0"/>
            <visualProperty name="NETWORK_HEIGHT" default="400.0"/>
            <visualProperty name="NETWORK_WIDTH" default="550.0"/>
            <visualProperty name="NETWORK_SIZE" default="550.0"/>
            <visualProperty name="NETWORK_TITLE" default=""/>
            <visualProperty name="NETWORK_EDGE_SELECTION" default="true"/>
            <visualProperty name="NETWORK_CENTER_Z_LOCATION" default="0.0"/>
        </network>
        <node>
            <dependency name="nodeCustomGraphicsSizeSync" value="true"/>
            <dependency name="nodeSizeLocked" value="true"/>
            <visualProperty name="NODE_Y_LOCATION" default="0.0"/>
            <visualProperty name="COMPOUND_NODE_PADDING" default="10.0"/>
            <visualProperty name="NODE_CUSTOMGRAPHICS_5" default="org.cytoscape.ding.customgraphics.NullCustomGraphics,0,[ Remove Graphics ],"/>
            <visualProperty name="COMPOUND_NODE_SHAPE" default="ROUND_RECTANGLE"/>
            <visualProperty name="NODE_CUSTOMPAINT_9" default="DefaultVisualizableVisualProperty(id=NODE_CUSTOMPAINT_9, name=Node Custom Paint 9)"/>
            <visualProperty name="NODE_CUSTOMGRAPHICS_POSITION_3" default="C,C,c,0.00,0.00"/>
            <visualProperty name="NODE_PAINT" default="#787878"/>
            <visualProperty name="NODE_CUSTOMGRAPHICS_SIZE_9" default="50.0"/>
            <visualProperty name="NODE_CUSTOMGRAPHICS_SIZE_1" default="50.0"/>
            <visualProperty name="NODE_BORDER_PAINT" default="#3399FF"/>
            <visualProperty name="NODE_CUSTOMGRAPHICS_1" default="org.cytoscape.ding.customgraphics.NullCustomGraphics,0,[ Remove Graphics ],"/>
            <visualProperty name="NODE_CUSTOMGRAPHICS_8" default="org.cytoscape.ding.customgraphics.NullCustomGraphics,0,[ Remove Graphics ],"/>
            <visualProperty name="NODE_TRANSPARENCY" default="255"/>
            <visualProperty name="NODE_CUSTOMGRAPHICS_SIZE_2" default="50.0"/>
            <visualProperty name="NODE_LABEL_POSITION" default="C,C,c,0.00,0.00"/>
            <visualProperty name="NODE_Z_LOCATION" default="0.0"/>
            <visualProperty name="NODE_CUSTOMPAINT_6" default="DefaultVisualizableVisualProperty(id=NODE_CUSTOMPAINT_6, name=Node Custom Paint 6)"/>
            <visualProperty name="NODE_CUSTOMGRAPHICS_POSITION_1" default="C,C,c,0.00,0.00"/>
            <visualProperty name="NODE_DEPTH" default="0.0"/>
            <visualProperty name="NODE_CUSTOMPAINT_2" default="DefaultVisualizableVisualProperty(id=NODE_CUSTOMPAINT_2, name=Node Custom Paint 2)"/>
            <visualProperty name="NODE_CUSTOMGRAPHICS_SIZE_7" default="50.0"/>
            <visualProperty name="NODE_X_LOCATION" default="0.0"/>
            <visualProperty name="NODE_LABEL_FONT_FACE" default="SansSerif.plain,plain,12"/>
            <visualProperty name="NODE_CUSTOMGRAPHICS_9" default="org.cytoscape.ding.customgraphics.NullCustomGraphics,0,[ Remove Graphics ],"/>
            <visualProperty name="NODE_BORDER_TRANSPARENCY" default="255"/>
            <visualProperty name="NODE_CUSTOMGRAPHICS_POSITION_2" default="C,C,c,0.00,0.00"/>
            <visualProperty name="NODE_CUSTOMGRAPHICS_6" default="org.cytoscape.ding.customgraphics.NullCustomGraphics,0,[ Remove Graphics ],"/>
            <visualProperty name="NODE_CUSTOMGRAPHICS_POSITION_6" default="C,C,c,0.00,0.00"/>
            <visualProperty name="NODE_CUSTOMPAINT_7" default="DefaultVisualizableVisualProperty(id=NODE_CUSTOMPAINT_7, name=Node Custom Paint 7)"/>
            <visualProperty name="NODE_LABEL_WIDTH" default="200.0"/>
            <visualProperty name="NODE_SELECTED_PAINT" default="#FFFFCC"/>
            <visualProperty name="NODE_FILL_COLOR" default="#FFFFFF"/>
            <visualProperty name="NODE_CUSTOMGRAPHICS_2" default="org.cytoscape.ding.customgraphics.NullCustomGraphics,0,[ Remove Graphics ],"/>
            <visualProperty name="NODE_CUSTOMGRAPHICS_POSITION_4" default="C,C,c,0.00,0.00"/>
            <visualProperty name="NODE_TOOLTIP" default=""/>
            <visualProperty name="NODE_LABEL_TRANSPARENCY" default="255"/>
            <visualProperty name="NODE_WIDTH" default="80.0"/>
            <visualProperty name="NODE_CUSTOMGRAPHICS_POSITION_7" default="C,C,c,0.00,0.00"/>
            <visualProperty name="NODE_SHAPE" default="ELLIPSE"/>
            <visualProperty name="NODE_CUSTOMPAINT_5" default="DefaultVisualizableVisualProperty(id=NODE_CUSTOMPAINT_5, name=Node Custom Paint 5)"/>
            <visualProperty name="NODE_CUSTOMGRAPHICS_POSITION_9" default="C,C,c,0.00,0.00"/>
            <visualProperty name="NODE_CUSTOMGRAPHICS_4" default="org.cytoscape.ding.customgraphics.NullCustomGraphics,0,[ Remove Graphics ],"/>
            <visualProperty name="NODE_CUSTOMGRAPHICS_7" default="org.cytoscape.ding.customgraphics.NullCustomGraphics,0,[ Remove Graphics ],"/>
            <visualProperty name="NODE_CUSTOMGRAPHICS_3" default="org.cytoscape.ding.customgraphics.NullCustomGraphics,0,[ Remove Graphics ],"/>
            <visualProperty name="NODE_CUSTOMPAINT_3" default="DefaultVisualizableVisualProperty(id=NODE_CUSTOMPAINT_3, name=Node Custom Paint 3)"/>
            <visualProperty name="NODE_HEIGHT" default="80.0"/>
            <visualProperty name="NODE_SIZE" default="50.0"/>
            <visualProperty name="NODE_CUSTOMPAINT_1" default="DefaultVisualizableVisualProperty(id=NODE_CUSTOMPAINT_1, name=Node Custom Paint 1)"/>
            <visualProperty name="NODE_CUSTOMPAINT_8" default="DefaultVisualizableVisualProperty(id=NODE_CUSTOMPAINT_8, name=Node Custom Paint 8)"/>
            <visualProperty name="NODE_CUSTOMGRAPHICS_POSITION_8" default="C,C,c,0.00,0.00"/>
            <visualProperty name="NODE_SELECTED" default="false"/>
            <visualProperty name="NODE_CUSTOMGRAPHICS_SIZE_8" default="50.0"/>
            <visualProperty name="NODE_LABEL_COLOR" default="#133A60"/>
            <visualProperty name="NODE_BORDER_STROKE" default="SOLID"/>
            <visualProperty name="NODE_CUSTOMGRAPHICS_SIZE_5" default="50.0"/>
            <visualProperty name="NODE_CUSTOMGRAPHICS_SIZE_4" default="50.0"/>
            <visualProperty name="NODE_VISIBLE" default="true"/>
            <visualProperty name="NODE_BORDER_WIDTH" default="20.0"/>
            <visualProperty name="NODE_LABEL_FONT_SIZE" default="8"/>
            <visualProperty name="NODE_CUSTOMGRAPHICS_SIZE_6" default="50.0"/>
            <visualProperty name="NODE_NESTED_NETWORK_IMAGE_VISIBLE" default="true"/>
            <visualProperty name="NODE_LABEL" default="">
                <passthroughMapping attributeType="string" attributeName="name"/>
            </visualProperty>
            <visualProperty name="NODE_CUSTOMPAINT_4" default="DefaultVisualizableVisualProperty(id=NODE_CUSTOMPAINT_4, name=Node Custom Paint 4)"/>
            <visualProperty name="NODE_CUSTOMGRAPHICS_SIZE_3" default="50.0"/>
            <visualProperty name="NODE_CUSTOMGRAPHICS_POSITION_5" default="C,C,c,0.00,0.00"/>
        </node>
        <edge>
            <dependency name="arrowColorMatchesEdge" value="false"/>
            <visualProperty name="EDGE_SELECTED" default="false"/>
            <visualProperty name="EDGE_SOURCE_ARROW_UNSELECTED_PAINT" default="#000000"/>
            <visualProperty name="EDGE_UNSELECTED_PAINT" default="#404040"/>
            <visualProperty name="EDGE_TOOLTIP" default=""/>
            <visualProperty name="EDGE_SOURCE_ARROW_SELECTED_PAINT" default="#FFFF00"/>
            <visualProperty name="EDGE_LABEL_TRANSPARENCY" default="255"/>
            <visualProperty name="EDGE_LABEL_FONT_FACE" default="SansSerif.plain,plain,10"/>
            <visualProperty name="EDGE_TARGET_ARROW_SHAPE" default="NONE"/>
            <visualProperty name="EDGE_LABEL_FONT_SIZE" default="10"/>
            <visualProperty name="EDGE_TARGET_ARROW_SIZE" default="6.0"/>
            <visualProperty name="EDGE_VISIBLE" default="true"/>
            <visualProperty name="EDGE_WIDTH" default="3.0"/>
            <visualProperty name="EDGE_TRANSPARENCY" default="255"/>
            <visualProperty name="EDGE_LABEL_WIDTH" default="200.0"/>
            <visualProperty name="EDGE_LABEL_COLOR" default="#000000"/>
            <visualProperty name="EDGE_STROKE_UNSELECTED_PAINT" default="#3399FF"/>
            <visualProperty name="EDGE_PAINT" default="#808080"/>
            <visualProperty name="EDGE_CURVED" default="true"/>
            <visualProperty name="EDGE_SOURCE_ARROW_SIZE" default="6.0"/>
            <visualProperty name="EDGE_BEND" default=""/>
            <visualProperty name="EDGE_STROKE_SELECTED_PAINT" default="#FF0000"/>
            <visualProperty name="EDGE_SOURCE_ARROW_SHAPE" default="NONE"/>
            <visualProperty name="EDGE_LABEL" default=""/>
            <visualProperty name="EDGE_SELECTED_PAINT" default="#FF0000"/>
            <visualProperty name="EDGE_LINE_TYPE" default="SOLID"/>
            <visualProperty name="EDGE_TARGET_ARROW_SELECTED_PAINT" default="#FFFF00"/>
            <visualProperty name="EDGE_TARGET_ARROW_UNSELECTED_PAINT" default="#000000"/>
        </edge>
    </visualStyle>
    <visualStyle name="size_rank">
        <network>
            <visualProperty name="NETWORK_CENTER_X_LOCATION" default="0.0"/>
            <visualProperty name="NETWORK_CENTER_Y_LOCATION" default="0.0"/>
            <visualProperty name="NETWORK_NODE_SELECTION" default="true"/>
            <visualProperty name="NETWORK_DEPTH" default="0.0"/>
            <visualProperty name="NETWORK_BACKGROUND_PAINT" default="#EBEBEB"/>
            <visualProperty name="NETWORK_SCALE_FACTOR" default="1.0"/>
            <visualProperty name="NETWORK_HEIGHT" default="400.0"/>
            <visualProperty name="NETWORK_WIDTH" default="550.0"/>
            <visualProperty name="NETWORK_SIZE" default="550.0"/>
            <visualProperty name="NETWORK_TITLE" default=""/>
            <visualProperty name="NETWORK_EDGE_SELECTION" default="true"/>
            <visualProperty name="NETWORK_CENTER_Z_LOCATION" default="0.0"/>
        </network>
        <node>
            <dependency name="nodeCustomGraphicsSizeSync" value="true"/>
            <dependency name="nodeSizeLocked" value="true"/>
            <visualProperty name="NODE_Y_LOCATION" default="0.0"/>
            <visualProperty name="COMPOUND_NODE_PADDING" default="10.0"/>
            <visualProperty name="NODE_CUSTOMGRAPHICS_5" default="org.cytoscape.ding.customgraphics.NullCustomGraphics,0,[ Remove Graphics ],"/>
            <visualProperty name="COMPOUND_NODE_SHAPE" default="ROUND_RECTANGLE"/>
            <visualProperty name="NODE_CUSTOMPAINT_9" default="DefaultVisualizableVisualProperty(id=NODE_CUSTOMPAINT_9, name=Node Custom Paint 9)"/>
            <visualProperty name="NODE_CUSTOMGRAPHICS_POSITION_3" default="C,C,c,0.00,0.00"/>
            <visualProperty name="NODE_PAINT" default="#787878"/>
            <visualProperty name="NODE_CUSTOMGRAPHICS_SIZE_9" default="50.0"/>
            <visualProperty name="NODE_CUSTOMGRAPHICS_SIZE_1" default="50.0"/>
            <visualProperty name="NODE_BORDER_PAINT" default="#000000"/>
            <visualProperty name="NODE_CUSTOMGRAPHICS_1" default="org.cytoscape.ding.customgraphics.NullCustomGraphics,0,[ Remove Graphics ],"/>
            <visualProperty name="NODE_CUSTOMGRAPHICS_8" default="org.cytoscape.ding.customgraphics.NullCustomGraphics,0,[ Remove Graphics ],"/>
            <visualProperty name="NODE_TRANSPARENCY" default="255"/>
            <visualProperty name="NODE_CUSTOMGRAPHICS_SIZE_2" default="50.0"/>
            <visualProperty name="NODE_LABEL_POSITION" default="C,C,c,0.00,0.00"/>
            <visualProperty name="NODE_Z_LOCATION" default="0.0"/>
            <visualProperty name="NODE_CUSTOMPAINT_6" default="DefaultVisualizableVisualProperty(id=NODE_CUSTOMPAINT_6, name=Node Custom Paint 6)"/>
            <visualProperty name="NODE_CUSTOMGRAPHICS_POSITION_1" default="C,C,c,0.00,0.00"/>
            <visualProperty name="NODE_DEPTH" default="0.0"/>
            <visualProperty name="NODE_CUSTOMPAINT_2" default="DefaultVisualizableVisualProperty(id=NODE_CUSTOMPAINT_2, name=Node Custom Paint 2)"/>
            <visualProperty name="NODE_CUSTOMGRAPHICS_SIZE_7" default="50.0"/>
            <visualProperty name="NODE_X_LOCATION" default="0.0"/>
            <visualProperty name="NODE_LABEL_FONT_FACE" default="SansSerif.plain,plain,12"/>
            <visualProperty name="NODE_CUSTOMGRAPHICS_9" default="org.cytoscape.ding.customgraphics.NullCustomGraphics,0,[ Remove Graphics ],"/>
            <visualProperty name="NODE_BORDER_TRANSPARENCY" default="255"/>
            <visualProperty name="NODE_CUSTOMGRAPHICS_POSITION_2" default="C,C,c,0.00,0.00"/>
            <visualProperty name="NODE_CUSTOMGRAPHICS_6" default="org.cytoscape.ding.customgraphics.NullCustomGraphics,0,[ Remove Graphics ],"/>
            <visualProperty name="NODE_CUSTOMGRAPHICS_POSITION_6" default="C,C,c,0.00,0.00"/>
            <visualProperty name="NODE_CUSTOMPAINT_7" default="DefaultVisualizableVisualProperty(id=NODE_CUSTOMPAINT_7, name=Node Custom Paint 7)"/>
            <visualProperty name="NODE_LABEL_WIDTH" default="200.0"/>
            <visualProperty name="NODE_SELECTED_PAINT" default="#FFFF00"/>
            <visualProperty name="NODE_FILL_COLOR" default="#CCCCFF"/>
            <visualProperty name="NODE_CUSTOMGRAPHICS_2" default="org.cytoscape.ding.customgraphics.NullCustomGraphics,0,[ Remove Graphics ],"/>
            <visualProperty name="NODE_CUSTOMGRAPHICS_POSITION_4" default="C,C,c,0.00,0.00"/>
            <visualProperty name="NODE_TOOLTIP" default=""/>
            <visualProperty name="NODE_LABEL_TRANSPARENCY" default="255"/>
            <visualProperty name="NODE_WIDTH" default="50.0"/>
            <visualProperty name="NODE_CUSTOMGRAPHICS_POSITION_7" default="C,C,c,0.00,0.00"/>
            <visualProperty name="NODE_SHAPE" default="RECTANGLE"/>
            <visualProperty name="NODE_CUSTOMPAINT_5" default="DefaultVisualizableVisualProperty(id=NODE_CUSTOMPAINT_5, name=Node Custom Paint 5)"/>
            <visualProperty name="NODE_CUSTOMGRAPHICS_POSITION_9" default="C,C,c,0.00,0.00"/>
            <visualProperty name="NODE_CUSTOMGRAPHICS_4" default="org.cytoscape.ding.customgraphics.NullCustomGraphics,0,[ Remove Graphics ],"/>
            <visualProperty name="NODE_CUSTOMGRAPHICS_7" default="org.cytoscape.ding.customgraphics.NullCustomGraphics,0,[ Remove Graphics ],"/>
            <visualProperty name="NODE_CUSTOMGRAPHICS_3" default="org.cytoscape.ding.customgraphics.NullCustomGraphics,0,[ Remove Graphics ],"/>
            <visualProperty name="NODE_CUSTOMPAINT_3" default="DefaultVisualizableVisualProperty(id=NODE_CUSTOMPAINT_3, name=Node Custom Paint 3)"/>
            <visualProperty name="NODE_HEIGHT" default="50.0"/>
            <visualProperty name="NODE_SIZE" default="12.0">
                <continuousMapping attributeType="float" attributeName="diffusion_output__rank">
                    <continuousMappingPoint lesserValue="1.0" greaterValue="39.11245096536507" equalValue="39.11245096536507" attrValue="0.0"/>
                    <continuousMappingPoint lesserValue="13.821692732043733" greaterValue="1.0" equalValue="13.821692732043733" attrValue="99.0"/>
                </continuousMapping>
            </visualProperty>
            <visualProperty name="NODE_CUSTOMPAINT_1" default="DefaultVisualizableVisualProperty(id=NODE_CUSTOMPAINT_1, name=Node Custom Paint 1)"/>
            <visualProperty name="NODE_CUSTOMPAINT_8" default="DefaultVisualizableVisualProperty(id=NODE_CUSTOMPAINT_8, name=Node Custom Paint 8)"/>
            <visualProperty name="NODE_CUSTOMGRAPHICS_POSITION_8" default="C,C,c,0.00,0.00"/>
            <visualProperty name="NODE_SELECTED" default="false"/>
            <visualProperty name="NODE_CUSTOMGRAPHICS_SIZE_8" default="50.0"/>
            <visualProperty name="NODE_LABEL_COLOR" default="#333333"/>
            <visualProperty name="NODE_BORDER_STROKE" default="SOLID"/>
            <visualProperty name="NODE_CUSTOMGRAPHICS_SIZE_5" default="50.0"/>
            <visualProperty name="NODE_CUSTOMGRAPHICS_SIZE_4" default="50.0"/>
            <visualProperty name="NODE_VISIBLE" default="true"/>
            <visualProperty name="NODE_BORDER_WIDTH" default="0.0"/>
            <visualProperty name="NODE_LABEL_FONT_SIZE" default="9"/>
            <visualProperty name="NODE_CUSTOMGRAPHICS_SIZE_6" default="50.0"/>
            <visualProperty name="NODE_NESTED_NETWORK_IMAGE_VISIBLE" default="true"/>
            <visualProperty name="NODE_LABEL" default="">
                <passthroughMapping attributeType="string" attributeName="name"/>
            </visualProperty>
            <visualProperty name="NODE_CUSTOMPAINT_4" default="DefaultVisualizableVisualProperty(id=NODE_CUSTOMPAINT_4, name=Node Custom Paint 4)"/>
            <visualProperty name="NODE_CUSTOMGRAPHICS_SIZE_3" default="50.0"/>
            <visualProperty name="NODE_CUSTOMGRAPHICS_POSITION_5" default="C,C,c,0.00,0.00"/>
        </node>
        <edge>
            <dependency name="arrowColorMatchesEdge" value="false"/>
            <visualProperty name="EDGE_SELECTED" default="false"/>
            <visualProperty name="EDGE_SOURCE_ARROW_UNSELECTED_PAINT" default="#000000"/>
            <visualProperty name="EDGE_UNSELECTED_PAINT" default="#404040"/>
            <visualProperty name="EDGE_TOOLTIP" default=""/>
            <visualProperty name="EDGE_SOURCE_ARROW_SELECTED_PAINT" default="#FFFF00"/>
            <visualProperty name="EDGE_LABEL_TRANSPARENCY" default="255"/>
            <visualProperty name="EDGE_LABEL_FONT_FACE" default="SansSerif.plain,plain,10"/>
            <visualProperty name="EDGE_TARGET_ARROW_SHAPE" default="NONE"/>
            <visualProperty name="EDGE_LABEL_FONT_SIZE" default="10"/>
            <visualProperty name="EDGE_TARGET_ARROW_SIZE" default="6.0"/>
            <visualProperty name="EDGE_VISIBLE" default="true"/>
            <visualProperty name="EDGE_WIDTH" default="2.0"/>
            <visualProperty name="EDGE_TRANSPARENCY" default="255"/>
            <visualProperty name="EDGE_LABEL_WIDTH" default="200.0"/>
            <visualProperty name="EDGE_LABEL_COLOR" default="#000000"/>
            <visualProperty name="EDGE_STROKE_UNSELECTED_PAINT" default="#4C4C4C"/>
            <visualProperty name="EDGE_PAINT" default="#808080"/>
            <visualProperty name="EDGE_CURVED" default="true"/>
            <visualProperty name="EDGE_SOURCE_ARROW_SIZE" default="6.0"/>
            <visualProperty name="EDGE_BEND" default=""/>
            <visualProperty name="EDGE_STROKE_SELECTED_PAINT" default="#FF0000"/>
            <visualProperty name="EDGE_SOURCE_ARROW_SHAPE" default="NONE"/>
            <visualProperty name="EDGE_LABEL" default=""/>
            <visualProperty name="EDGE_SELECTED_PAINT" default="#FF0000"/>
            <visualProperty name="EDGE_LINE_TYPE" default="SOLID"/>
            <visualProperty name="EDGE_TARGET_ARROW_SELECTED_PAINT" default="#FFFF00"/>
            <visualProperty name="EDGE_TARGET_ARROW_UNSELECTED_PAINT" default="#000000"/>
        </edge>
    </visualStyle>
    <visualStyle name="Sample3">
        <network>
            <visualProperty name="NETWORK_CENTER_X_LOCATION" default="0.0"/>
            <visualProperty name="NETWORK_CENTER_Y_LOCATION" default="0.0"/>
            <visualProperty name="NETWORK_NODE_SELECTION" default="true"/>
            <visualProperty name="NETWORK_DEPTH" default="0.0"/>
            <visualProperty name="NETWORK_BACKGROUND_PAINT" default="#3E3E3E"/>
            <visualProperty name="NETWORK_SCALE_FACTOR" default="1.0"/>
            <visualProperty name="NETWORK_HEIGHT" default="400.0"/>
            <visualProperty name="NETWORK_WIDTH" default="550.0"/>
            <visualProperty name="NETWORK_TITLE" default=""/>
            <visualProperty name="NETWORK_EDGE_SELECTION" default="true"/>
            <visualProperty name="NETWORK_CENTER_Z_LOCATION" default="0.0"/>
        </network>
        <node>
            <dependency name="nodeCustomGraphicsSizeSync" value="true"/>
            <dependency name="nodeSizeLocked" value="true"/>
            <visualProperty name="NODE_Y_LOCATION" default="0.0"/>
            <visualProperty name="COMPOUND_NODE_PADDING" default="10.0"/>
            <visualProperty name="NODE_CUSTOMGRAPHICS_5" default="org.cytoscape.ding.customgraphics.NullCustomGraphics,0,[ Remove Graphics ],"/>
            <visualProperty name="COMPOUND_NODE_SHAPE" default="ROUND_RECTANGLE"/>
            <visualProperty name="NODE_CUSTOMGRAPHICS_POSITION_3" default="C,C,c,0.00,0.00"/>
            <visualProperty name="NODE_CUSTOMGRAPHICS_SIZE_9" default="0.0"/>
            <visualProperty name="NODE_CUSTOMGRAPHICS_SIZE_1" default="0.0"/>
            <visualProperty name="NODE_BORDER_PAINT" default="#FFFFFF"/>
            <visualProperty name="NODE_CUSTOMGRAPHICS_1" default="org.cytoscape.ding.customgraphics.NullCustomGraphics,0,[ Remove Graphics ],"/>
            <visualProperty name="NODE_CUSTOMGRAPHICS_8" default="org.cytoscape.ding.customgraphics.NullCustomGraphics,0,[ Remove Graphics ],"/>
            <visualProperty name="NODE_TRANSPARENCY" default="255"/>
            <visualProperty name="NODE_CUSTOMGRAPHICS_SIZE_2" default="0.0"/>
            <visualProperty name="NODE_LABEL_POSITION" default="S,NW,c,0.00,3.00"/>
            <visualProperty name="NODE_Z_LOCATION" default="0.0"/>
            <visualProperty name="NODE_CUSTOMGRAPHICS_POSITION_1" default="C,C,c,0.00,0.00"/>
            <visualProperty name="NODE_DEPTH" default="0.0"/>
            <visualProperty name="NODE_CUSTOMGRAPHICS_SIZE_7" default="0.0"/>
            <visualProperty name="NODE_X_LOCATION" default="0.0"/>
            <visualProperty name="NODE_LABEL_FONT_FACE" default="SansSerif.plain,plain,12"/>
            <visualProperty name="NODE_CUSTOMGRAPHICS_9" default="org.cytoscape.ding.customgraphics.NullCustomGraphics,0,[ Remove Graphics ],"/>
            <visualProperty name="NODE_BORDER_TRANSPARENCY" default="255"/>
            <visualProperty name="NODE_CUSTOMGRAPHICS_POSITION_2" default="C,C,c,0.00,0.00"/>
            <visualProperty name="NODE_CUSTOMGRAPHICS_6" default="org.cytoscape.ding.customgraphics.NullCustomGraphics,0,[ Remove Graphics ],"/>
            <visualProperty name="NODE_CUSTOMGRAPHICS_POSITION_6" default="C,C,c,0.00,0.00"/>
            <visualProperty name="NODE_LABEL_WIDTH" default="200.0"/>
            <visualProperty name="NODE_SELECTED_PAINT" default="#FFFF00"/>
            <visualProperty name="NODE_FILL_COLOR" default="#3D9AFF"/>
            <visualProperty name="NODE_CUSTOMGRAPHICS_2" default="org.cytoscape.ding.customgraphics.NullCustomGraphics,0,[ Remove Graphics ],"/>
            <visualProperty name="NODE_CUSTOMGRAPHICS_POSITION_4" default="C,C,c,0.00,0.00"/>
            <visualProperty name="NODE_TOOLTIP" default=""/>
            <visualProperty name="NODE_LABEL_TRANSPARENCY" default="255"/>
            <visualProperty name="NODE_WIDTH" default="60.0"/>
            <visualProperty name="NODE_CUSTOMGRAPHICS_POSITION_7" default="C,C,c,0.00,0.00"/>
            <visualProperty name="NODE_SHAPE" default="ELLIPSE"/>
            <visualProperty name="NODE_CUSTOMGRAPHICS_POSITION_9" default="C,C,c,0.00,0.00"/>
            <visualProperty name="NODE_CUSTOMGRAPHICS_4" default="org.cytoscape.ding.customgraphics.NullCustomGraphics,0,[ Remove Graphics ],"/>
            <visualProperty name="NODE_CUSTOMGRAPHICS_7" default="org.cytoscape.ding.customgraphics.NullCustomGraphics,0,[ Remove Graphics ],"/>
            <visualProperty name="NODE_CUSTOMGRAPHICS_3" default="org.cytoscape.ding.customgraphics.NullCustomGraphics,0,[ Remove Graphics ],"/>
            <visualProperty name="NODE_HEIGHT" default="40.0"/>
            <visualProperty name="NODE_SIZE" default="20.0"/>
            <visualProperty name="NODE_CUSTOMGRAPHICS_POSITION_8" default="C,C,c,0.00,0.00"/>
            <visualProperty name="NODE_SELECTED" default="false"/>
            <visualProperty name="NODE_CUSTOMGRAPHICS_SIZE_8" default="0.0"/>
            <visualProperty name="NODE_LABEL_COLOR" default="#CECECE"/>
            <visualProperty name="NODE_BORDER_STROKE" default="SOLID"/>
            <visualProperty name="NODE_CUSTOMGRAPHICS_SIZE_5" default="0.0"/>
            <visualProperty name="NODE_CUSTOMGRAPHICS_SIZE_4" default="0.0"/>
            <visualProperty name="NODE_VISIBLE" default="true"/>
            <visualProperty name="NODE_BORDER_WIDTH" default="8.0"/>
            <visualProperty name="NODE_LABEL_FONT_SIZE" default="14"/>
            <visualProperty name="NODE_CUSTOMGRAPHICS_SIZE_6" default="0.0"/>
            <visualProperty name="NODE_NESTED_NETWORK_IMAGE_VISIBLE" default="true"/>
            <visualProperty name="NODE_LABEL" default="">
                <passthroughMapping attributeType="string" attributeName="name"/>
            </visualProperty>
            <visualProperty name="NODE_CUSTOMGRAPHICS_SIZE_3" default="0.0"/>
            <visualProperty name="NODE_CUSTOMGRAPHICS_POSITION_5" default="C,C,c,0.00,0.00"/>
        </node>
        <edge>
            <dependency name="arrowColorMatchesEdge" value="false"/>
            <visualProperty name="EDGE_SELECTED" default="false"/>
            <visualProperty name="EDGE_SOURCE_ARROW_UNSELECTED_PAINT" default="#000000"/>
            <visualProperty name="EDGE_TOOLTIP" default=""/>
            <visualProperty name="EDGE_SOURCE_ARROW_SELECTED_PAINT" default="#FFFF00"/>
            <visualProperty name="EDGE_LABEL_TRANSPARENCY" default="255"/>
            <visualProperty name="EDGE_LABEL_FONT_FACE" default="SansSerif.plain,plain,10"/>
            <visualProperty name="EDGE_TARGET_ARROW_SHAPE" default="NONE"/>
            <visualProperty name="EDGE_LABEL_FONT_SIZE" default="10"/>
            <visualProperty name="EDGE_TARGET_ARROW_SIZE" default="6.0"/>
            <visualProperty name="EDGE_VISIBLE" default="true"/>
            <visualProperty name="EDGE_WIDTH" default="2.0"/>
            <visualProperty name="EDGE_TRANSPARENCY" default="255"/>
            <visualProperty name="EDGE_LABEL_WIDTH" default="200.0"/>
            <visualProperty name="EDGE_LABEL_COLOR" default="#000000"/>
            <visualProperty name="EDGE_STROKE_UNSELECTED_PAINT" default="#FFFFFF"/>
            <visualProperty name="EDGE_CURVED" default="true"/>
            <visualProperty name="EDGE_SOURCE_ARROW_SIZE" default="6.0"/>
            <visualProperty name="EDGE_STROKE_SELECTED_PAINT" default="#FF0000"/>
            <visualProperty name="EDGE_SOURCE_ARROW_SHAPE" default="NONE"/>
            <visualProperty name="EDGE_LABEL" default=""/>
            <visualProperty name="EDGE_LINE_TYPE" default="SOLID"/>
            <visualProperty name="EDGE_TARGET_ARROW_SELECTED_PAINT" default="#FFFF00"/>
            <visualProperty name="EDGE_TARGET_ARROW_UNSELECTED_PAINT" default="#000000"/>
        </edge>
    </visualStyle>
    <visualStyle name="default">
        <network>
            <visualProperty name="NETWORK_CENTER_X_LOCATION" default="0.0"/>
            <visualProperty name="NETWORK_CENTER_Y_LOCATION" default="0.0"/>
            <visualProperty name="NETWORK_NODE_SELECTION" default="true"/>
            <visualProperty name="NETWORK_DEPTH" default="0.0"/>
            <visualProperty name="NETWORK_BACKGROUND_PAINT" default="#FFFFFF"/>
            <visualProperty name="NETWORK_SCALE_FACTOR" default="1.0"/>
            <visualProperty name="NETWORK_HEIGHT" default="400.0"/>
            <visualProperty name="NETWORK_WIDTH" default="550.0"/>
            <visualProperty name="NETWORK_SIZE" default="550.0"/>
            <visualProperty name="NETWORK_TITLE" default=""/>
            <visualProperty name="NETWORK_EDGE_SELECTION" default="true"/>
            <visualProperty name="NETWORK_CENTER_Z_LOCATION" default="0.0"/>
        </network>
        <node>
            <dependency name="nodeCustomGraphicsSizeSync" value="true"/>
            <dependency name="nodeSizeLocked" value="false"/>
            <visualProperty name="NODE_Y_LOCATION" default="0.0"/>
            <visualProperty name="COMPOUND_NODE_PADDING" default="10.0"/>
            <visualProperty name="NODE_CUSTOMGRAPHICS_5" default="org.cytoscape.ding.customgraphics.NullCustomGraphics,0,[ Remove Graphics ],"/>
            <visualProperty name="COMPOUND_NODE_SHAPE" default="ROUND_RECTANGLE"/>
            <visualProperty name="NODE_CUSTOMPAINT_9" default="DefaultVisualizableVisualProperty(id=NODE_CUSTOMPAINT_9, name=Node Custom Paint 9)"/>
            <visualProperty name="NODE_CUSTOMGRAPHICS_POSITION_3" default="C,C,c,0.00,0.00"/>
            <visualProperty name="NODE_PAINT" default="#1E90FF"/>
            <visualProperty name="NODE_CUSTOMGRAPHICS_SIZE_9" default="50.0"/>
            <visualProperty name="NODE_CUSTOMGRAPHICS_SIZE_1" default="50.0"/>
            <visualProperty name="NODE_BORDER_PAINT" default="#CCCCCC"/>
            <visualProperty name="NODE_CUSTOMGRAPHICS_1" default="org.cytoscape.ding.customgraphics.NullCustomGraphics,0,[ Remove Graphics ],"/>
            <visualProperty name="NODE_CUSTOMGRAPHICS_8" default="org.cytoscape.ding.customgraphics.NullCustomGraphics,0,[ Remove Graphics ],"/>
            <visualProperty name="NODE_TRANSPARENCY" default="255"/>
            <visualProperty name="NODE_CUSTOMGRAPHICS_SIZE_2" default="50.0"/>
            <visualProperty name="NODE_LABEL_POSITION" default="C,C,c,0.00,0.00"/>
            <visualProperty name="NODE_Z_LOCATION" default="0.0"/>
            <visualProperty name="NODE_CUSTOMPAINT_6" default="DefaultVisualizableVisualProperty(id=NODE_CUSTOMPAINT_6, name=Node Custom Paint 6)"/>
            <visualProperty name="NODE_CUSTOMGRAPHICS_POSITION_1" default="C,C,c,0.00,0.00"/>
            <visualProperty name="NODE_DEPTH" default="0.0"/>
            <visualProperty name="NODE_CUSTOMPAINT_2" default="DefaultVisualizableVisualProperty(id=NODE_CUSTOMPAINT_2, name=Node Custom Paint 2)"/>
            <visualProperty name="NODE_CUSTOMGRAPHICS_SIZE_7" default="50.0"/>
            <visualProperty name="NODE_X_LOCATION" default="0.0"/>
            <visualProperty name="NODE_LABEL_FONT_FACE" default="SansSerif.plain,plain,12"/>
            <visualProperty name="NODE_CUSTOMGRAPHICS_9" default="org.cytoscape.ding.customgraphics.NullCustomGraphics,0,[ Remove Graphics ],"/>
            <visualProperty name="NODE_BORDER_TRANSPARENCY" default="255"/>
            <visualProperty name="NODE_CUSTOMGRAPHICS_POSITION_2" default="C,C,c,0.00,0.00"/>
            <visualProperty name="NODE_CUSTOMGRAPHICS_6" default="org.cytoscape.ding.customgraphics.NullCustomGraphics,0,[ Remove Graphics ],"/>
            <visualProperty name="NODE_CUSTOMGRAPHICS_POSITION_6" default="C,C,c,0.00,0.00"/>
            <visualProperty name="NODE_CUSTOMPAINT_7" default="DefaultVisualizableVisualProperty(id=NODE_CUSTOMPAINT_7, name=Node Custom Paint 7)"/>
            <visualProperty name="NODE_LABEL_WIDTH" default="200.0"/>
            <visualProperty name="NODE_SELECTED_PAINT" default="#FFFF00"/>
            <visualProperty name="NODE_FILL_COLOR" default="#89D0F5"/>
            <visualProperty name="NODE_CUSTOMGRAPHICS_2" default="org.cytoscape.ding.customgraphics.NullCustomGraphics,0,[ Remove Graphics ],"/>
            <visualProperty name="NODE_CUSTOMGRAPHICS_POSITION_4" default="C,C,c,0.00,0.00"/>
            <visualProperty name="NODE_TOOLTIP" default=""/>
            <visualProperty name="NODE_LABEL_TRANSPARENCY" default="255"/>
            <visualProperty name="NODE_WIDTH" default="75.0"/>
            <visualProperty name="NODE_CUSTOMGRAPHICS_POSITION_7" default="C,C,c,0.00,0.00"/>
            <visualProperty name="NODE_SHAPE" default="ROUND_RECTANGLE"/>
            <visualProperty name="NODE_CUSTOMPAINT_5" default="DefaultVisualizableVisualProperty(id=NODE_CUSTOMPAINT_5, name=Node Custom Paint 5)"/>
            <visualProperty name="NODE_CUSTOMGRAPHICS_POSITION_9" default="C,C,c,0.00,0.00"/>
            <visualProperty name="NODE_CUSTOMGRAPHICS_4" default="org.cytoscape.ding.customgraphics.NullCustomGraphics,0,[ Remove Graphics ],"/>
            <visualProperty name="NODE_CUSTOMGRAPHICS_7" default="org.cytoscape.ding.customgraphics.NullCustomGraphics,0,[ Remove Graphics ],"/>
            <visualProperty name="NODE_CUSTOMGRAPHICS_3" default="org.cytoscape.ding.customgraphics.NullCustomGraphics,0,[ Remove Graphics ],"/>
            <visualProperty name="NODE_CUSTOMPAINT_3" default="DefaultVisualizableVisualProperty(id=NODE_CUSTOMPAINT_3, name=Node Custom Paint 3)"/>
            <visualProperty name="NODE_HEIGHT" default="35.0"/>
            <visualProperty name="NODE_SIZE" default="35.0"/>
            <visualProperty name="NODE_CUSTOMPAINT_1" default="DefaultVisualizableVisualProperty(id=NODE_CUSTOMPAINT_1, name=Node Custom Paint 1)"/>
            <visualProperty name="NODE_CUSTOMPAINT_8" default="DefaultVisualizableVisualProperty(id=NODE_CUSTOMPAINT_8, name=Node Custom Paint 8)"/>
            <visualProperty name="NODE_CUSTOMGRAPHICS_POSITION_8" default="C,C,c,0.00,0.00"/>
            <visualProperty name="NODE_SELECTED" default="false"/>
            <visualProperty name="NODE_CUSTOMGRAPHICS_SIZE_8" default="50.0"/>
            <visualProperty name="NODE_LABEL_COLOR" default="#000000"/>
            <visualProperty name="NODE_BORDER_STROKE" default="SOLID"/>
            <visualProperty name="NODE_CUSTOMGRAPHICS_SIZE_5" default="50.0"/>
            <visualProperty name="NODE_CUSTOMGRAPHICS_SIZE_4" default="50.0"/>
            <visualProperty name="NODE_VISIBLE" default="true"/>
            <visualProperty name="NODE_BORDER_WIDTH" default="0.0"/>
            <visualProperty name="NODE_LABEL_FONT_SIZE" default="12"/>
            <visualProperty name="NODE_CUSTOMGRAPHICS_SIZE_6" default="50.0"/>
            <visualProperty name="NODE_NESTED_NETWORK_IMAGE_VISIBLE" default="true"/>
            <visualProperty name="NODE_LABEL" default="">
                <passthroughMapping attributeType="string" attributeName="name"/>
            </visualProperty>
            <visualProperty name="NODE_CUSTOMPAINT_4" default="DefaultVisualizableVisualProperty(id=NODE_CUSTOMPAINT_4, name=Node Custom Paint 4)"/>
            <visualProperty name="NODE_CUSTOMGRAPHICS_SIZE_3" default="50.0"/>
            <visualProperty name="NODE_CUSTOMGRAPHICS_POSITION_5" default="C,C,c,0.00,0.00"/>
        </node>
        <edge>
            <dependency name="arrowColorMatchesEdge" value="false"/>
            <visualProperty name="EDGE_SELECTED" default="false"/>
            <visualProperty name="EDGE_SOURCE_ARROW_UNSELECTED_PAINT" default="#000000"/>
            <visualProperty name="EDGE_UNSELECTED_PAINT" default="#404040"/>
            <visualProperty name="EDGE_TOOLTIP" default=""/>
            <visualProperty name="EDGE_SOURCE_ARROW_SELECTED_PAINT" default="#FFFF00"/>
            <visualProperty name="EDGE_LABEL_TRANSPARENCY" default="255"/>
            <visualProperty name="EDGE_LABEL_FONT_FACE" default="Dialog.plain,plain,10"/>
            <visualProperty name="EDGE_TARGET_ARROW_SHAPE" default="NONE"/>
            <visualProperty name="EDGE_LABEL_FONT_SIZE" default="10"/>
            <visualProperty name="EDGE_TARGET_ARROW_SIZE" default="6.0"/>
            <visualProperty name="EDGE_VISIBLE" default="true"/>
            <visualProperty name="EDGE_WIDTH" default="2.0"/>
            <visualProperty name="EDGE_TRANSPARENCY" default="255"/>
            <visualProperty name="EDGE_LABEL_WIDTH" default="200.0"/>
            <visualProperty name="EDGE_LABEL_COLOR" default="#000000"/>
            <visualProperty name="EDGE_STROKE_UNSELECTED_PAINT" default="#848484"/>
            <visualProperty name="EDGE_PAINT" default="#323232"/>
            <visualProperty name="EDGE_CURVED" default="true"/>
            <visualProperty name="EDGE_SOURCE_ARROW_SIZE" default="6.0"/>
            <visualProperty name="EDGE_BEND" default=""/>
            <visualProperty name="EDGE_STROKE_SELECTED_PAINT" default="#FF0000"/>
            <visualProperty name="EDGE_SOURCE_ARROW_SHAPE" default="NONE"/>
            <visualProperty name="EDGE_LABEL" default=""/>
            <visualProperty name="EDGE_SELECTED_PAINT" default="#FF0000"/>
            <visualProperty name="EDGE_LINE_TYPE" default="SOLID"/>
            <visualProperty name="EDGE_TARGET_ARROW_SELECTED_PAINT" default="#FFFF00"/>
            <visualProperty name="EDGE_TARGET_ARROW_UNSELECTED_PAINT" default="#000000"/>
        </edge>
    </visualStyle>
    <visualStyle name="MetFlexLog2BioSB2018">
        <network>
            <visualProperty name="NETWORK_CENTER_X_LOCATION" default="0.0"/>
            <visualProperty name="NETWORK_CENTER_Y_LOCATION" default="0.0"/>
            <visualProperty name="NETWORK_NODE_SELECTION" default="true"/>
            <visualProperty name="NETWORK_DEPTH" default="0.0"/>
            <visualProperty name="NETWORK_BACKGROUND_PAINT" default="#FFFFFF"/>
            <visualProperty name="NETWORK_SCALE_FACTOR" default="1.0"/>
            <visualProperty name="NETWORK_HEIGHT" default="400.0"/>
            <visualProperty name="NETWORK_WIDTH" default="550.0"/>
            <visualProperty name="NETWORK_SIZE" default="550.0"/>
            <visualProperty name="NETWORK_TITLE" default=""/>
            <visualProperty name="NETWORK_EDGE_SELECTION" default="true"/>
            <visualProperty name="NETWORK_CENTER_Z_LOCATION" default="0.0"/>
        </network>
        <node>
            <dependency name="nodeCustomGraphicsSizeSync" value="true"/>
            <dependency name="nodeSizeLocked" value="true"/>
            <visualProperty name="NODE_Y_LOCATION" default="0.0"/>
            <visualProperty name="COMPOUND_NODE_PADDING" default="10.0"/>
            <visualProperty name="NODE_CUSTOMGRAPHICS_5" default="org.cytoscape.ding.customgraphics.NullCustomGraphics,0,[ Remove Graphics ],"/>
            <visualProperty name="COMPOUND_NODE_SHAPE" default="ROUND_RECTANGLE"/>
            <visualProperty name="NODE_CUSTOMPAINT_9" default="DefaultVisualizableVisualProperty(id=NODE_CUSTOMPAINT_9, name=Node Custom Paint 9)"/>
            <visualProperty name="NODE_CUSTOMGRAPHICS_POSITION_3" default="C,C,c,0.00,0.00"/>
            <visualProperty name="NODE_PAINT" default="#787878"/>
            <visualProperty name="NODE_CUSTOMGRAPHICS_SIZE_9" default="50.0"/>
            <visualProperty name="NODE_CUSTOMGRAPHICS_SIZE_1" default="50.0"/>
            <visualProperty name="NODE_BORDER_PAINT" default="#919191">
                <continuousMapping attributeType="float" attributeName="GSE55200_P.Value">
                    <continuousMappingPoint lesserValue="#000000" greaterValue="#00CC00" equalValue="#00CC00" attrValue="0.0"/>
                    <continuousMappingPoint lesserValue="#00CC00" greaterValue="#999999" equalValue="#00CC00" attrValue="0.05000000074505806"/>
                </continuousMapping>
            </visualProperty>
            <visualProperty name="NODE_CUSTOMGRAPHICS_1" default="org.cytoscape.ding.customgraphics.NullCustomGraphics,0,[ Remove Graphics ],"/>
            <visualProperty name="NODE_CUSTOMGRAPHICS_8" default="org.cytoscape.ding.customgraphics.NullCustomGraphics,0,[ Remove Graphics ],"/>
            <visualProperty name="NODE_TRANSPARENCY" default="255"/>
            <visualProperty name="NODE_CUSTOMGRAPHICS_SIZE_2" default="50.0"/>
            <visualProperty name="NODE_LABEL_POSITION" default="C,C,c,0.00,0.00"/>
            <visualProperty name="NODE_Z_LOCATION" default="0.0"/>
            <visualProperty name="NODE_CUSTOMPAINT_6" default="DefaultVisualizableVisualProperty(id=NODE_CUSTOMPAINT_6, name=Node Custom Paint 6)"/>
            <visualProperty name="NODE_CUSTOMGRAPHICS_POSITION_1" default="C,C,c,0.00,0.00"/>
            <visualProperty name="NODE_DEPTH" default="0.0"/>
            <visualProperty name="NODE_CUSTOMPAINT_2" default="DefaultVisualizableVisualProperty(id=NODE_CUSTOMPAINT_2, name=Node Custom Paint 2)"/>
            <visualProperty name="NODE_CUSTOMGRAPHICS_SIZE_7" default="50.0"/>
            <visualProperty name="NODE_X_LOCATION" default="0.0"/>
            <visualProperty name="NODE_LABEL_FONT_FACE" default="Arial Bold,plain,12"/>
            <visualProperty name="NODE_CUSTOMGRAPHICS_9" default="org.cytoscape.ding.customgraphics.NullCustomGraphics,0,[ Remove Graphics ],"/>
            <visualProperty name="NODE_BORDER_TRANSPARENCY" default="255"/>
            <visualProperty name="NODE_CUSTOMGRAPHICS_POSITION_2" default="C,C,c,0.00,0.00"/>
            <visualProperty name="NODE_CUSTOMGRAPHICS_6" default="org.cytoscape.ding.customgraphics.NullCustomGraphics,0,[ Remove Graphics ],"/>
            <visualProperty name="NODE_CUSTOMGRAPHICS_POSITION_6" default="C,C,c,0.00,0.00"/>
            <visualProperty name="NODE_CUSTOMPAINT_7" default="DefaultVisualizableVisualProperty(id=NODE_CUSTOMPAINT_7, name=Node Custom Paint 7)"/>
            <visualProperty name="NODE_LABEL_WIDTH" default="200.0"/>
            <visualProperty name="NODE_SELECTED_PAINT" default="#FF0066"/>
            <visualProperty name="NODE_FILL_COLOR" default="#CCCCCC">
                <continuousMapping attributeType="float" attributeName="GSE55200">
                    <continuousMappingPoint lesserValue="#0066FF" greaterValue="#0066FF" equalValue="#0066FF" attrValue="-0.5849625"/>
                    <continuousMappingPoint lesserValue="#FFFFFF" greaterValue="#FFFFFF" equalValue="#FFFFFF" attrValue="0.0"/>
                    <continuousMappingPoint lesserValue="#FF0066" greaterValue="#FF0066" equalValue="#FF0066" attrValue="0.5849625"/>
                </continuousMapping>
            </visualProperty>
            <visualProperty name="NODE_CUSTOMGRAPHICS_2" default="org.cytoscape.ding.customgraphics.NullCustomGraphics,0,[ Remove Graphics ],"/>
            <visualProperty name="NODE_CUSTOMGRAPHICS_POSITION_4" default="C,C,c,0.00,0.00"/>
            <visualProperty name="NODE_TOOLTIP" default=""/>
            <visualProperty name="NODE_LABEL_TRANSPARENCY" default="255"/>
            <visualProperty name="NODE_WIDTH" default="50.0"/>
            <visualProperty name="NODE_CUSTOMGRAPHICS_POSITION_7" default="C,C,c,0.00,0.00"/>
            <visualProperty name="NODE_SHAPE" default="ELLIPSE">
                <discreteMapping attributeType="string" attributeName="NodeType">
                    <discreteMappingEntry value="TRIANGLE" attributeValue="Drugs"/>
                    <discreteMappingEntry value="HEXAGON" attributeValue="Metabolite"/>
                    <discreteMappingEntry value="DIAMOND" attributeValue="Process"/>
                    <discreteMappingEntry value="ELLIPSE" attributeValue="Protein"/>
                </discreteMapping>
            </visualProperty>
            <visualProperty name="NODE_CUSTOMPAINT_5" default="DefaultVisualizableVisualProperty(id=NODE_CUSTOMPAINT_5, name=Node Custom Paint 5)"/>
            <visualProperty name="NODE_CUSTOMGRAPHICS_POSITION_9" default="C,C,c,0.00,0.00"/>
            <visualProperty name="NODE_CUSTOMGRAPHICS_4" default="org.cytoscape.ding.customgraphics.NullCustomGraphics,0,[ Remove Graphics ],"/>
            <visualProperty name="NODE_CUSTOMGRAPHICS_7" default="org.cytoscape.ding.customgraphics.NullCustomGraphics,0,[ Remove Graphics ],"/>
            <visualProperty name="NODE_CUSTOMGRAPHICS_3" default="org.cytoscape.ding.customgraphics.NullCustomGraphics,0,[ Remove Graphics ],"/>
            <visualProperty name="NODE_CUSTOMPAINT_3" default="DefaultVisualizableVisualProperty(id=NODE_CUSTOMPAINT_3, name=Node Custom Paint 3)"/>
            <visualProperty name="NODE_HEIGHT" default="50.0"/>
            <visualProperty name="NODE_SIZE" default="65.0"/>
            <visualProperty name="NODE_CUSTOMPAINT_1" default="DefaultVisualizableVisualProperty(id=NODE_CUSTOMPAINT_1, name=Node Custom Paint 1)"/>
            <visualProperty name="NODE_CUSTOMPAINT_8" default="DefaultVisualizableVisualProperty(id=NODE_CUSTOMPAINT_8, name=Node Custom Paint 8)"/>
            <visualProperty name="NODE_CUSTOMGRAPHICS_POSITION_8" default="C,C,c,0.00,0.00"/>
            <visualProperty name="NODE_SELECTED" default="false"/>
            <visualProperty name="NODE_CUSTOMGRAPHICS_SIZE_8" default="50.0"/>
            <visualProperty name="NODE_LABEL_COLOR" default="#000000"/>
            <visualProperty name="NODE_BORDER_STROKE" default="SOLID"/>
            <visualProperty name="NODE_CUSTOMGRAPHICS_SIZE_5" default="50.0"/>
            <visualProperty name="NODE_CUSTOMGRAPHICS_SIZE_4" default="50.0"/>
            <visualProperty name="NODE_VISIBLE" default="true"/>
            <visualProperty name="NODE_BORDER_WIDTH" default="7.0">
                <continuousMapping attributeType="float" attributeName="GSE55200_P.Value">
                    <continuousMappingPoint lesserValue="1.0" greaterValue="12.0" equalValue="12.0" attrValue="0.0"/>
                    <continuousMappingPoint lesserValue="8.0" greaterValue="8.0" equalValue="8.0" attrValue="0.05000000074505806"/>
                    <continuousMappingPoint lesserValue="5.0" greaterValue="5.0" equalValue="5.0" attrValue="0.054999999701976776"/>
                    <continuousMappingPoint lesserValue="5.0" greaterValue="1.0" equalValue="5.0" attrValue="1.0"/>
                </continuousMapping>
            </visualProperty>
            <visualProperty name="NODE_LABEL_FONT_SIZE" default="22"/>
            <visualProperty name="NODE_CUSTOMGRAPHICS_SIZE_6" default="50.0"/>
            <visualProperty name="NODE_NESTED_NETWORK_IMAGE_VISIBLE" default="true"/>
            <visualProperty name="NODE_LABEL" default="">
                <passthroughMapping attributeType="string" attributeName="name"/>
            </visualProperty>
            <visualProperty name="NODE_CUSTOMPAINT_4" default="DefaultVisualizableVisualProperty(id=NODE_CUSTOMPAINT_4, name=Node Custom Paint 4)"/>
            <visualProperty name="NODE_CUSTOMGRAPHICS_SIZE_3" default="50.0"/>
            <visualProperty name="NODE_CUSTOMGRAPHICS_POSITION_5" default="C,C,c,0.00,0.00"/>
        </node>
        <edge>
            <dependency name="arrowColorMatchesEdge" value="true"/>
            <visualProperty name="EDGE_SELECTED" default="false"/>
            <visualProperty name="EDGE_SOURCE_ARROW_UNSELECTED_PAINT" default="#000000"/>
            <visualProperty name="EDGE_UNSELECTED_PAINT" default="#CCCCCC">
                <discreteMapping attributeType="string" attributeName="interaction">
                    <discreteMappingEntry value="#FF6666" attributeValue="inhibits"/>
                </discreteMapping>
            </visualProperty>
            <visualProperty name="EDGE_TOOLTIP" default=""/>
            <visualProperty name="EDGE_SOURCE_ARROW_SELECTED_PAINT" default="#FFFF00"/>
            <visualProperty name="EDGE_LABEL_TRANSPARENCY" default="255"/>
            <visualProperty name="EDGE_LABEL_FONT_FACE" default="SansSerif.plain,plain,12"/>
            <visualProperty name="EDGE_TARGET_ARROW_SHAPE" default="DELTA">
                <discreteMapping attributeType="string" attributeName="interaction">
                    <discreteMappingEntry value="T" attributeValue="inhibits"/>
                </discreteMapping>
            </visualProperty>
            <visualProperty name="EDGE_LABEL_FONT_SIZE" default="18"/>
            <visualProperty name="EDGE_TARGET_ARROW_SIZE" default="12.0"/>
            <visualProperty name="EDGE_VISIBLE" default="true"/>
            <visualProperty name="EDGE_WIDTH" default="7.5"/>
            <visualProperty name="EDGE_TRANSPARENCY" default="255"/>
            <visualProperty name="EDGE_LABEL_WIDTH" default="200.0"/>
            <visualProperty name="EDGE_LABEL_COLOR" default="#3399FF"/>
            <visualProperty name="EDGE_STROKE_UNSELECTED_PAINT" default="#969696"/>
            <visualProperty name="EDGE_PAINT" default="#808080"/>
            <visualProperty name="EDGE_CURVED" default="true"/>
            <visualProperty name="EDGE_SOURCE_ARROW_SIZE" default="6.0"/>
            <visualProperty name="EDGE_BEND" default=""/>
            <visualProperty name="EDGE_STROKE_SELECTED_PAINT" default="#FF0000"/>
            <visualProperty name="EDGE_SOURCE_ARROW_SHAPE" default="NONE"/>
            <visualProperty name="EDGE_LABEL" default=""/>
            <visualProperty name="EDGE_SELECTED_PAINT" default="#FF0000"/>
            <visualProperty name="EDGE_LINE_TYPE" default="SOLID"/>
            <visualProperty name="EDGE_TARGET_ARROW_SELECTED_PAINT" default="#FFFF00"/>
            <visualProperty name="EDGE_TARGET_ARROW_UNSELECTED_PAINT" default="#333333"/>
        </edge>
    </visualStyle>
    <visualStyle name="MetFlex">
        <network>
            <visualProperty name="NETWORK_CENTER_X_LOCATION" default="0.0"/>
            <visualProperty name="NETWORK_CENTER_Y_LOCATION" default="0.0"/>
            <visualProperty name="NETWORK_NODE_SELECTION" default="true"/>
            <visualProperty name="NETWORK_DEPTH" default="0.0"/>
            <visualProperty name="NETWORK_BACKGROUND_PAINT" default="#FFFFFF"/>
            <visualProperty name="NETWORK_SCALE_FACTOR" default="1.0"/>
            <visualProperty name="NETWORK_HEIGHT" default="400.0"/>
            <visualProperty name="NETWORK_WIDTH" default="550.0"/>
            <visualProperty name="NETWORK_SIZE" default="550.0"/>
            <visualProperty name="NETWORK_TITLE" default=""/>
            <visualProperty name="NETWORK_EDGE_SELECTION" default="true"/>
            <visualProperty name="NETWORK_CENTER_Z_LOCATION" default="0.0"/>
        </network>
        <node>
            <dependency name="nodeCustomGraphicsSizeSync" value="true"/>
            <dependency name="nodeSizeLocked" value="true"/>
            <visualProperty name="NODE_Y_LOCATION" default="0.0"/>
            <visualProperty name="COMPOUND_NODE_PADDING" default="10.0"/>
            <visualProperty name="NODE_CUSTOMGRAPHICS_5" default="org.cytoscape.ding.customgraphics.NullCustomGraphics,0,[ Remove Graphics ],"/>
            <visualProperty name="COMPOUND_NODE_SHAPE" default="ROUND_RECTANGLE"/>
            <visualProperty name="NODE_CUSTOMPAINT_9" default="DefaultVisualizableVisualProperty(id=NODE_CUSTOMPAINT_9, name=Node Custom Paint 9)"/>
            <visualProperty name="NODE_CUSTOMGRAPHICS_POSITION_3" default="C,C,c,0.00,0.00"/>
            <visualProperty name="NODE_PAINT" default="#787878"/>
            <visualProperty name="NODE_CUSTOMGRAPHICS_SIZE_9" default="50.0"/>
            <visualProperty name="NODE_CUSTOMGRAPHICS_SIZE_1" default="50.0"/>
            <visualProperty name="NODE_BORDER_PAINT" default="#919191"/>
            <visualProperty name="NODE_CUSTOMGRAPHICS_1" default="org.cytoscape.ding.customgraphics.NullCustomGraphics,0,[ Remove Graphics ],"/>
            <visualProperty name="NODE_CUSTOMGRAPHICS_8" default="org.cytoscape.ding.customgraphics.NullCustomGraphics,0,[ Remove Graphics ],"/>
            <visualProperty name="NODE_TRANSPARENCY" default="255"/>
            <visualProperty name="NODE_CUSTOMGRAPHICS_SIZE_2" default="50.0"/>
            <visualProperty name="NODE_LABEL_POSITION" default="C,C,c,0.00,0.00"/>
            <visualProperty name="NODE_Z_LOCATION" default="0.0"/>
            <visualProperty name="NODE_CUSTOMPAINT_6" default="DefaultVisualizableVisualProperty(id=NODE_CUSTOMPAINT_6, name=Node Custom Paint 6)"/>
            <visualProperty name="NODE_CUSTOMGRAPHICS_POSITION_1" default="C,C,c,0.00,0.00"/>
            <visualProperty name="NODE_DEPTH" default="0.0"/>
            <visualProperty name="NODE_CUSTOMPAINT_2" default="DefaultVisualizableVisualProperty(id=NODE_CUSTOMPAINT_2, name=Node Custom Paint 2)"/>
            <visualProperty name="NODE_CUSTOMGRAPHICS_SIZE_7" default="50.0"/>
            <visualProperty name="NODE_X_LOCATION" default="0.0"/>
            <visualProperty name="NODE_LABEL_FONT_FACE" default="Arial Bold,plain,12"/>
            <visualProperty name="NODE_CUSTOMGRAPHICS_9" default="org.cytoscape.ding.customgraphics.NullCustomGraphics,0,[ Remove Graphics ],"/>
            <visualProperty name="NODE_BORDER_TRANSPARENCY" default="255"/>
            <visualProperty name="NODE_CUSTOMGRAPHICS_POSITION_2" default="C,C,c,0.00,0.00"/>
            <visualProperty name="NODE_CUSTOMGRAPHICS_6" default="org.cytoscape.ding.customgraphics.NullCustomGraphics,0,[ Remove Graphics ],"/>
            <visualProperty name="NODE_CUSTOMGRAPHICS_POSITION_6" default="C,C,c,0.00,0.00"/>
            <visualProperty name="NODE_CUSTOMPAINT_7" default="DefaultVisualizableVisualProperty(id=NODE_CUSTOMPAINT_7, name=Node Custom Paint 7)"/>
            <visualProperty name="NODE_LABEL_WIDTH" default="200.0"/>
            <visualProperty name="NODE_SELECTED_PAINT" default="#FF0066"/>
            <visualProperty name="NODE_FILL_COLOR" default="#FFFFFF">
                <discreteMapping attributeType="string" attributeName="Category">
                    <discreteMappingEntry value="#FF99FF" attributeValue="Regulators"/>
                    <discreteMappingEntry value="#99FFFF" attributeValue="TCA"/>
                    <discreteMappingEntry value="#FFCC99" attributeValue="FAOx"/>
                    <discreteMappingEntry value="#99FF99" attributeValue="Glycolysis"/>
                    <discreteMappingEntry value="#FFFF99" attributeValue="FASynth"/>
                </discreteMapping>
            </visualProperty>
            <visualProperty name="NODE_CUSTOMGRAPHICS_2" default="org.cytoscape.ding.customgraphics.NullCustomGraphics,0,[ Remove Graphics ],"/>
            <visualProperty name="NODE_CUSTOMGRAPHICS_POSITION_4" default="C,C,c,0.00,0.00"/>
            <visualProperty name="NODE_TOOLTIP" default=""/>
            <visualProperty name="NODE_LABEL_TRANSPARENCY" default="255"/>
            <visualProperty name="NODE_WIDTH" default="50.0"/>
            <visualProperty name="NODE_CUSTOMGRAPHICS_POSITION_7" default="C,C,c,0.00,0.00"/>
            <visualProperty name="NODE_SHAPE" default="ELLIPSE">
                <discreteMapping attributeType="string" attributeName="NodeType">
                    <discreteMappingEntry value="TRIANGLE" attributeValue="Drugs"/>
                    <discreteMappingEntry value="HEXAGON" attributeValue="Metabolite"/>
                    <discreteMappingEntry value="DIAMOND" attributeValue="Process"/>
                    <discreteMappingEntry value="ELLIPSE" attributeValue="Protein"/>
                </discreteMapping>
            </visualProperty>
            <visualProperty name="NODE_CUSTOMPAINT_5" default="DefaultVisualizableVisualProperty(id=NODE_CUSTOMPAINT_5, name=Node Custom Paint 5)"/>
            <visualProperty name="NODE_CUSTOMGRAPHICS_POSITION_9" default="C,C,c,0.00,0.00"/>
            <visualProperty name="NODE_CUSTOMGRAPHICS_4" default="org.cytoscape.ding.customgraphics.NullCustomGraphics,0,[ Remove Graphics ],"/>
            <visualProperty name="NODE_CUSTOMGRAPHICS_7" default="org.cytoscape.ding.customgraphics.NullCustomGraphics,0,[ Remove Graphics ],"/>
            <visualProperty name="NODE_CUSTOMGRAPHICS_3" default="org.cytoscape.ding.customgraphics.NullCustomGraphics,0,[ Remove Graphics ],"/>
            <visualProperty name="NODE_CUSTOMPAINT_3" default="DefaultVisualizableVisualProperty(id=NODE_CUSTOMPAINT_3, name=Node Custom Paint 3)"/>
            <visualProperty name="NODE_HEIGHT" default="50.0"/>
            <visualProperty name="NODE_SIZE" default="65.0"/>
            <visualProperty name="NODE_CUSTOMPAINT_1" default="DefaultVisualizableVisualProperty(id=NODE_CUSTOMPAINT_1, name=Node Custom Paint 1)"/>
            <visualProperty name="NODE_CUSTOMPAINT_8" default="DefaultVisualizableVisualProperty(id=NODE_CUSTOMPAINT_8, name=Node Custom Paint 8)"/>
            <visualProperty name="NODE_CUSTOMGRAPHICS_POSITION_8" default="C,C,c,0.00,0.00"/>
            <visualProperty name="NODE_SELECTED" default="false"/>
            <visualProperty name="NODE_CUSTOMGRAPHICS_SIZE_8" default="50.0"/>
            <visualProperty name="NODE_LABEL_COLOR" default="#000000"/>
            <visualProperty name="NODE_BORDER_STROKE" default="SOLID"/>
            <visualProperty name="NODE_CUSTOMGRAPHICS_SIZE_5" default="50.0"/>
            <visualProperty name="NODE_CUSTOMGRAPHICS_SIZE_4" default="50.0"/>
            <visualProperty name="NODE_VISIBLE" default="true"/>
            <visualProperty name="NODE_BORDER_WIDTH" default="7.0"/>
            <visualProperty name="NODE_LABEL_FONT_SIZE" default="22"/>
            <visualProperty name="NODE_CUSTOMGRAPHICS_SIZE_6" default="50.0"/>
            <visualProperty name="NODE_NESTED_NETWORK_IMAGE_VISIBLE" default="true"/>
            <visualProperty name="NODE_LABEL" default="">
                <passthroughMapping attributeType="string" attributeName="name"/>
            </visualProperty>
            <visualProperty name="NODE_CUSTOMPAINT_4" default="DefaultVisualizableVisualProperty(id=NODE_CUSTOMPAINT_4, name=Node Custom Paint 4)"/>
            <visualProperty name="NODE_CUSTOMGRAPHICS_SIZE_3" default="50.0"/>
            <visualProperty name="NODE_CUSTOMGRAPHICS_POSITION_5" default="C,C,c,0.00,0.00"/>
        </node>
        <edge>
            <dependency name="arrowColorMatchesEdge" value="true"/>
            <visualProperty name="EDGE_SELECTED" default="false"/>
            <visualProperty name="EDGE_SOURCE_ARROW_UNSELECTED_PAINT" default="#000000"/>
            <visualProperty name="EDGE_UNSELECTED_PAINT" default="#CCCCCC">
                <discreteMapping attributeType="string" attributeName="interaction">
                    <discreteMappingEntry value="#FF6666" attributeValue="inhibits"/>
                </discreteMapping>
            </visualProperty>
            <visualProperty name="EDGE_TOOLTIP" default=""/>
            <visualProperty name="EDGE_SOURCE_ARROW_SELECTED_PAINT" default="#FFFF00"/>
            <visualProperty name="EDGE_LABEL_TRANSPARENCY" default="255"/>
            <visualProperty name="EDGE_LABEL_FONT_FACE" default="SansSerif.plain,plain,12"/>
            <visualProperty name="EDGE_TARGET_ARROW_SHAPE" default="DELTA">
                <discreteMapping attributeType="string" attributeName="interaction">
                    <discreteMappingEntry value="T" attributeValue="inhibits"/>
                </discreteMapping>
            </visualProperty>
            <visualProperty name="EDGE_LABEL_FONT_SIZE" default="18"/>
            <visualProperty name="EDGE_TARGET_ARROW_SIZE" default="12.0"/>
            <visualProperty name="EDGE_VISIBLE" default="true"/>
            <visualProperty name="EDGE_WIDTH" default="7.5"/>
            <visualProperty name="EDGE_TRANSPARENCY" default="255"/>
            <visualProperty name="EDGE_LABEL_WIDTH" default="200.0"/>
            <visualProperty name="EDGE_LABEL_COLOR" default="#3399FF"/>
            <visualProperty name="EDGE_STROKE_UNSELECTED_PAINT" default="#969696"/>
            <visualProperty name="EDGE_PAINT" default="#808080"/>
            <visualProperty name="EDGE_CURVED" default="true"/>
            <visualProperty name="EDGE_SOURCE_ARROW_SIZE" default="6.0"/>
            <visualProperty name="EDGE_BEND" default=""/>
            <visualProperty name="EDGE_STROKE_SELECTED_PAINT" default="#FF0000"/>
            <visualProperty name="EDGE_SOURCE_ARROW_SHAPE" default="NONE"/>
            <visualProperty name="EDGE_LABEL" default=""/>
            <visualProperty name="EDGE_SELECTED_PAINT" default="#FF0000"/>
            <visualProperty name="EDGE_LINE_TYPE" default="SOLID"/>
            <visualProperty name="EDGE_TARGET_ARROW_SELECTED_PAINT" default="#FFFF00"/>
            <visualProperty name="EDGE_TARGET_ARROW_UNSELECTED_PAINT" default="#333333"/>
        </edge>
    </visualStyle>
    <visualStyle name="Universe">
        <network>
            <visualProperty name="NETWORK_CENTER_X_LOCATION" default="0.0"/>
            <visualProperty name="NETWORK_CENTER_Y_LOCATION" default="0.0"/>
            <visualProperty name="NETWORK_NODE_SELECTION" default="true"/>
            <visualProperty name="NETWORK_DEPTH" default="0.0"/>
            <visualProperty name="NETWORK_BACKGROUND_PAINT" default="#000000"/>
            <visualProperty name="NETWORK_SCALE_FACTOR" default="1.0"/>
            <visualProperty name="NETWORK_HEIGHT" default="400.0"/>
            <visualProperty name="NETWORK_WIDTH" default="550.0"/>
            <visualProperty name="NETWORK_SIZE" default="550.0"/>
            <visualProperty name="NETWORK_TITLE" default=""/>
            <visualProperty name="NETWORK_EDGE_SELECTION" default="true"/>
            <visualProperty name="NETWORK_CENTER_Z_LOCATION" default="0.0"/>
        </network>
        <node>
            <dependency name="nodeCustomGraphicsSizeSync" value="true"/>
            <dependency name="nodeSizeLocked" value="true"/>
            <visualProperty name="NODE_Y_LOCATION" default="0.0"/>
            <visualProperty name="COMPOUND_NODE_PADDING" default="10.0"/>
            <visualProperty name="NODE_CUSTOMGRAPHICS_5" default="org.cytoscape.ding.customgraphics.NullCustomGraphics,0,[ Remove Graphics ],"/>
            <visualProperty name="COMPOUND_NODE_SHAPE" default="ROUND_RECTANGLE"/>
            <visualProperty name="NODE_CUSTOMPAINT_9" default="DefaultVisualizableVisualProperty(id=NODE_CUSTOMPAINT_9, name=Node Custom Paint 9)"/>
            <visualProperty name="NODE_CUSTOMGRAPHICS_POSITION_3" default="C,C,c,0.00,0.00"/>
            <visualProperty name="NODE_PAINT" default="#787878"/>
            <visualProperty name="NODE_CUSTOMGRAPHICS_SIZE_9" default="50.0"/>
            <visualProperty name="NODE_CUSTOMGRAPHICS_SIZE_1" default="50.0"/>
            <visualProperty name="NODE_BORDER_PAINT" default="#000000"/>
            <visualProperty name="NODE_CUSTOMGRAPHICS_1" default="org.cytoscape.ding.customgraphics.NullCustomGraphics,0,[ Remove Graphics ],"/>
            <visualProperty name="NODE_CUSTOMGRAPHICS_8" default="org.cytoscape.ding.customgraphics.NullCustomGraphics,0,[ Remove Graphics ],"/>
            <visualProperty name="NODE_TRANSPARENCY" default="255"/>
            <visualProperty name="NODE_CUSTOMGRAPHICS_SIZE_2" default="50.0"/>
            <visualProperty name="NODE_LABEL_POSITION" default="C,C,c,0.00,0.00"/>
            <visualProperty name="NODE_Z_LOCATION" default="0.0"/>
            <visualProperty name="NODE_CUSTOMPAINT_6" default="DefaultVisualizableVisualProperty(id=NODE_CUSTOMPAINT_6, name=Node Custom Paint 6)"/>
            <visualProperty name="NODE_CUSTOMGRAPHICS_POSITION_1" default="C,C,c,0.00,0.00"/>
            <visualProperty name="NODE_DEPTH" default="0.0"/>
            <visualProperty name="NODE_CUSTOMPAINT_2" default="DefaultVisualizableVisualProperty(id=NODE_CUSTOMPAINT_2, name=Node Custom Paint 2)"/>
            <visualProperty name="NODE_CUSTOMGRAPHICS_SIZE_7" default="50.0"/>
            <visualProperty name="NODE_X_LOCATION" default="0.0"/>
            <visualProperty name="NODE_LABEL_FONT_FACE" default="Monospaced.plain,plain,12"/>
            <visualProperty name="NODE_CUSTOMGRAPHICS_9" default="org.cytoscape.ding.customgraphics.NullCustomGraphics,0,[ Remove Graphics ],"/>
            <visualProperty name="NODE_BORDER_TRANSPARENCY" default="255"/>
            <visualProperty name="NODE_CUSTOMGRAPHICS_POSITION_2" default="C,C,c,0.00,0.00"/>
            <visualProperty name="NODE_CUSTOMGRAPHICS_6" default="org.cytoscape.ding.customgraphics.NullCustomGraphics,0,[ Remove Graphics ],"/>
            <visualProperty name="NODE_CUSTOMGRAPHICS_POSITION_6" default="C,C,c,0.00,0.00"/>
            <visualProperty name="NODE_CUSTOMPAINT_7" default="DefaultVisualizableVisualProperty(id=NODE_CUSTOMPAINT_7, name=Node Custom Paint 7)"/>
            <visualProperty name="NODE_LABEL_WIDTH" default="200.0"/>
            <visualProperty name="NODE_SELECTED_PAINT" default="#FFFF00"/>
            <visualProperty name="NODE_FILL_COLOR" default="#000000"/>
            <visualProperty name="NODE_CUSTOMGRAPHICS_2" default="org.cytoscape.ding.customgraphics.NullCustomGraphics,0,[ Remove Graphics ],"/>
            <visualProperty name="NODE_CUSTOMGRAPHICS_POSITION_4" default="C,C,c,0.00,0.00"/>
            <visualProperty name="NODE_TOOLTIP" default=""/>
            <visualProperty name="NODE_LABEL_TRANSPARENCY" default="255"/>
            <visualProperty name="NODE_WIDTH" default="20.0"/>
            <visualProperty name="NODE_CUSTOMGRAPHICS_POSITION_7" default="C,C,c,0.00,0.00"/>
            <visualProperty name="NODE_SHAPE" default="ELLIPSE"/>
            <visualProperty name="NODE_CUSTOMPAINT_5" default="DefaultVisualizableVisualProperty(id=NODE_CUSTOMPAINT_5, name=Node Custom Paint 5)"/>
            <visualProperty name="NODE_CUSTOMGRAPHICS_POSITION_9" default="C,C,c,0.00,0.00"/>
            <visualProperty name="NODE_CUSTOMGRAPHICS_4" default="org.cytoscape.ding.customgraphics.NullCustomGraphics,0,[ Remove Graphics ],"/>
            <visualProperty name="NODE_CUSTOMGRAPHICS_7" default="org.cytoscape.ding.customgraphics.NullCustomGraphics,0,[ Remove Graphics ],"/>
            <visualProperty name="NODE_CUSTOMGRAPHICS_3" default="org.cytoscape.ding.customgraphics.NullCustomGraphics,0,[ Remove Graphics ],"/>
            <visualProperty name="NODE_CUSTOMPAINT_3" default="DefaultVisualizableVisualProperty(id=NODE_CUSTOMPAINT_3, name=Node Custom Paint 3)"/>
            <visualProperty name="NODE_HEIGHT" default="20.0"/>
            <visualProperty name="NODE_SIZE" default="40.0"/>
            <visualProperty name="NODE_CUSTOMPAINT_1" default="DefaultVisualizableVisualProperty(id=NODE_CUSTOMPAINT_1, name=Node Custom Paint 1)"/>
            <visualProperty name="NODE_CUSTOMPAINT_8" default="DefaultVisualizableVisualProperty(id=NODE_CUSTOMPAINT_8, name=Node Custom Paint 8)"/>
            <visualProperty name="NODE_CUSTOMGRAPHICS_POSITION_8" default="C,C,c,0.00,0.00"/>
            <visualProperty name="NODE_SELECTED" default="false"/>
            <visualProperty name="NODE_CUSTOMGRAPHICS_SIZE_8" default="50.0"/>
            <visualProperty name="NODE_LABEL_COLOR" default="#FFFFFF"/>
            <visualProperty name="NODE_BORDER_STROKE" default="SOLID"/>
            <visualProperty name="NODE_CUSTOMGRAPHICS_SIZE_5" default="50.0"/>
            <visualProperty name="NODE_CUSTOMGRAPHICS_SIZE_4" default="50.0"/>
            <visualProperty name="NODE_VISIBLE" default="true"/>
            <visualProperty name="NODE_BORDER_WIDTH" default="0.0"/>
            <visualProperty name="NODE_LABEL_FONT_SIZE" default="18"/>
            <visualProperty name="NODE_CUSTOMGRAPHICS_SIZE_6" default="50.0"/>
            <visualProperty name="NODE_NESTED_NETWORK_IMAGE_VISIBLE" default="true"/>
            <visualProperty name="NODE_LABEL" default="">
                <passthroughMapping attributeType="string" attributeName="name"/>
            </visualProperty>
            <visualProperty name="NODE_CUSTOMPAINT_4" default="DefaultVisualizableVisualProperty(id=NODE_CUSTOMPAINT_4, name=Node Custom Paint 4)"/>
            <visualProperty name="NODE_CUSTOMGRAPHICS_SIZE_3" default="50.0"/>
            <visualProperty name="NODE_CUSTOMGRAPHICS_POSITION_5" default="C,C,c,0.00,0.00"/>
        </node>
        <edge>
            <dependency name="arrowColorMatchesEdge" value="false"/>
            <visualProperty name="EDGE_SELECTED" default="false"/>
            <visualProperty name="EDGE_SOURCE_ARROW_UNSELECTED_PAINT" default="#000000"/>
            <visualProperty name="EDGE_UNSELECTED_PAINT" default="#404040"/>
            <visualProperty name="EDGE_TOOLTIP" default=""/>
            <visualProperty name="EDGE_SOURCE_ARROW_SELECTED_PAINT" default="#FFFF00"/>
            <visualProperty name="EDGE_LABEL_TRANSPARENCY" default="255"/>
            <visualProperty name="EDGE_LABEL_FONT_FACE" default="Dialog.plain,plain,10"/>
            <visualProperty name="EDGE_TARGET_ARROW_SHAPE" default="NONE"/>
            <visualProperty name="EDGE_LABEL_FONT_SIZE" default="10"/>
            <visualProperty name="EDGE_TARGET_ARROW_SIZE" default="6.0"/>
            <visualProperty name="EDGE_VISIBLE" default="true"/>
            <visualProperty name="EDGE_WIDTH" default="2.0"/>
            <visualProperty name="EDGE_TRANSPARENCY" default="255"/>
            <visualProperty name="EDGE_LABEL_WIDTH" default="200.0"/>
            <visualProperty name="EDGE_LABEL_COLOR" default="#000000"/>
            <visualProperty name="EDGE_STROKE_UNSELECTED_PAINT" default="#999999"/>
            <visualProperty name="EDGE_PAINT" default="#323232"/>
            <visualProperty name="EDGE_CURVED" default="true"/>
            <visualProperty name="EDGE_SOURCE_ARROW_SIZE" default="6.0"/>
            <visualProperty name="EDGE_BEND" default=""/>
            <visualProperty name="EDGE_STROKE_SELECTED_PAINT" default="#FF0000"/>
            <visualProperty name="EDGE_SOURCE_ARROW_SHAPE" default="NONE"/>
            <visualProperty name="EDGE_LABEL" default=""/>
            <visualProperty name="EDGE_SELECTED_PAINT" default="#FF0000"/>
            <visualProperty name="EDGE_LINE_TYPE" default="LONG_DASH"/>
            <visualProperty name="EDGE_TARGET_ARROW_SELECTED_PAINT" default="#FFFF00"/>
            <visualProperty name="EDGE_TARGET_ARROW_UNSELECTED_PAINT" default="#000000"/>
        </edge>
    </visualStyle>
    <visualStyle name="Curved">
        <network>
            <visualProperty name="NETWORK_CENTER_X_LOCATION" default="0.0"/>
            <visualProperty name="NETWORK_CENTER_Y_LOCATION" default="0.0"/>
            <visualProperty name="NETWORK_NODE_SELECTION" default="true"/>
            <visualProperty name="NETWORK_DEPTH" default="0.0"/>
            <visualProperty name="NETWORK_BACKGROUND_PAINT" default="#DAD6CD"/>
            <visualProperty name="NETWORK_SCALE_FACTOR" default="1.0"/>
            <visualProperty name="NETWORK_HEIGHT" default="400.0"/>
            <visualProperty name="NETWORK_WIDTH" default="550.0"/>
            <visualProperty name="NETWORK_TITLE" default=""/>
            <visualProperty name="NETWORK_EDGE_SELECTION" default="true"/>
            <visualProperty name="NETWORK_CENTER_Z_LOCATION" default="0.0"/>
        </network>
        <node>
            <dependency name="nodeCustomGraphicsSizeSync" value="true"/>
            <dependency name="nodeSizeLocked" value="true"/>
            <visualProperty name="NODE_Y_LOCATION" default="0.0"/>
            <visualProperty name="COMPOUND_NODE_PADDING" default="10.0"/>
            <visualProperty name="NODE_CUSTOMGRAPHICS_5" default="org.cytoscape.ding.customgraphics.NullCustomGraphics,0,[ Remove Graphics ],"/>
            <visualProperty name="COMPOUND_NODE_SHAPE" default="ROUND_RECTANGLE"/>
            <visualProperty name="NODE_CUSTOMGRAPHICS_POSITION_3" default="C,C,c,0.00,0.00"/>
            <visualProperty name="NODE_CUSTOMGRAPHICS_SIZE_9" default="0.0"/>
            <visualProperty name="NODE_CUSTOMGRAPHICS_SIZE_1" default="0.0"/>
            <visualProperty name="NODE_BORDER_PAINT" default="#FFFFFF"/>
            <visualProperty name="NODE_CUSTOMGRAPHICS_1" default="org.cytoscape.ding.customgraphics.NullCustomGraphics,0,[ Remove Graphics ],"/>
            <visualProperty name="NODE_CUSTOMGRAPHICS_8" default="org.cytoscape.ding.customgraphics.NullCustomGraphics,0,[ Remove Graphics ],"/>
            <visualProperty name="NODE_TRANSPARENCY" default="255"/>
            <visualProperty name="NODE_CUSTOMGRAPHICS_SIZE_2" default="0.0"/>
            <visualProperty name="NODE_LABEL_POSITION" default="SE,NW,c,-2.00,3.00"/>
            <visualProperty name="NODE_Z_LOCATION" default="0.0"/>
            <visualProperty name="NODE_CUSTOMGRAPHICS_POSITION_1" default="C,C,c,0.00,0.00"/>
            <visualProperty name="NODE_DEPTH" default="0.0"/>
            <visualProperty name="NODE_CUSTOMGRAPHICS_SIZE_7" default="0.0"/>
            <visualProperty name="NODE_X_LOCATION" default="0.0"/>
            <visualProperty name="NODE_LABEL_FONT_FACE" default="SansSerif.plain,plain,12"/>
            <visualProperty name="NODE_CUSTOMGRAPHICS_9" default="org.cytoscape.ding.customgraphics.NullCustomGraphics,0,[ Remove Graphics ],"/>
            <visualProperty name="NODE_BORDER_TRANSPARENCY" default="255"/>
            <visualProperty name="NODE_CUSTOMGRAPHICS_POSITION_2" default="C,C,c,0.00,0.00"/>
            <visualProperty name="NODE_CUSTOMGRAPHICS_6" default="org.cytoscape.ding.customgraphics.NullCustomGraphics,0,[ Remove Graphics ],"/>
            <visualProperty name="NODE_CUSTOMGRAPHICS_POSITION_6" default="C,C,c,0.00,0.00"/>
            <visualProperty name="NODE_LABEL_WIDTH" default="200.0"/>
            <visualProperty name="NODE_SELECTED_PAINT" default="#FFFF00"/>
            <visualProperty name="NODE_FILL_COLOR" default="#FEC44F"/>
            <visualProperty name="NODE_CUSTOMGRAPHICS_2" default="org.cytoscape.ding.customgraphics.NullCustomGraphics,0,[ Remove Graphics ],"/>
            <visualProperty name="NODE_CUSTOMGRAPHICS_POSITION_4" default="C,C,c,0.00,0.00"/>
            <visualProperty name="NODE_TOOLTIP" default=""/>
            <visualProperty name="NODE_LABEL_TRANSPARENCY" default="255"/>
            <visualProperty name="NODE_WIDTH" default="60.0"/>
            <visualProperty name="NODE_CUSTOMGRAPHICS_POSITION_7" default="C,C,c,0.00,0.00"/>
            <visualProperty name="NODE_SHAPE" default="ELLIPSE"/>
            <visualProperty name="NODE_CUSTOMGRAPHICS_POSITION_9" default="C,C,c,0.00,0.00"/>
            <visualProperty name="NODE_CUSTOMGRAPHICS_4" default="org.cytoscape.ding.customgraphics.NullCustomGraphics,0,[ Remove Graphics ],"/>
            <visualProperty name="NODE_CUSTOMGRAPHICS_7" default="org.cytoscape.ding.customgraphics.NullCustomGraphics,0,[ Remove Graphics ],"/>
            <visualProperty name="NODE_CUSTOMGRAPHICS_3" default="org.cytoscape.ding.customgraphics.NullCustomGraphics,0,[ Remove Graphics ],"/>
            <visualProperty name="NODE_HEIGHT" default="40.0"/>
            <visualProperty name="NODE_SIZE" default="18.0"/>
            <visualProperty name="NODE_CUSTOMGRAPHICS_POSITION_8" default="C,C,c,0.00,0.00"/>
            <visualProperty name="NODE_SELECTED" default="false"/>
            <visualProperty name="NODE_CUSTOMGRAPHICS_SIZE_8" default="0.0"/>
            <visualProperty name="NODE_LABEL_COLOR" default="#666666"/>
            <visualProperty name="NODE_BORDER_STROKE" default="SOLID"/>
            <visualProperty name="NODE_CUSTOMGRAPHICS_SIZE_5" default="0.0"/>
            <visualProperty name="NODE_CUSTOMGRAPHICS_SIZE_4" default="0.0"/>
            <visualProperty name="NODE_VISIBLE" default="true"/>
            <visualProperty name="NODE_BORDER_WIDTH" default="7.0"/>
            <visualProperty name="NODE_LABEL_FONT_SIZE" default="14"/>
            <visualProperty name="NODE_CUSTOMGRAPHICS_SIZE_6" default="0.0"/>
            <visualProperty name="NODE_NESTED_NETWORK_IMAGE_VISIBLE" default="true"/>
            <visualProperty name="NODE_LABEL" default="">
                <passthroughMapping attributeType="string" attributeName="name"/>
            </visualProperty>
            <visualProperty name="NODE_CUSTOMGRAPHICS_SIZE_3" default="0.0"/>
            <visualProperty name="NODE_CUSTOMGRAPHICS_POSITION_5" default="C,C,c,0.00,0.00"/>
        </node>
        <edge>
            <dependency name="arrowColorMatchesEdge" value="true"/>
            <visualProperty name="EDGE_SELECTED" default="false"/>
            <visualProperty name="EDGE_SOURCE_ARROW_UNSELECTED_PAINT" default="#000000"/>
            <visualProperty name="EDGE_UNSELECTED_PAINT" default="#FFFFFF"/>
            <visualProperty name="EDGE_TOOLTIP" default=""/>
            <visualProperty name="EDGE_SOURCE_ARROW_SELECTED_PAINT" default="#FFFF00"/>
            <visualProperty name="EDGE_LABEL_TRANSPARENCY" default="255"/>
            <visualProperty name="EDGE_LABEL_FONT_FACE" default="SansSerif.plain,plain,10"/>
            <visualProperty name="EDGE_TARGET_ARROW_SHAPE" default="DELTA"/>
            <visualProperty name="EDGE_LABEL_FONT_SIZE" default="10"/>
            <visualProperty name="EDGE_TARGET_ARROW_SIZE" default="6.0"/>
            <visualProperty name="EDGE_VISIBLE" default="true"/>
            <visualProperty name="EDGE_WIDTH" default="3.0"/>
            <visualProperty name="EDGE_TRANSPARENCY" default="255"/>
            <visualProperty name="EDGE_LABEL_WIDTH" default="200.0"/>
            <visualProperty name="EDGE_LABEL_COLOR" default="#000000"/>
            <visualProperty name="EDGE_STROKE_UNSELECTED_PAINT" default="#FFFFFF"/>
            <visualProperty name="EDGE_CURVED" default="true"/>
            <visualProperty name="EDGE_SOURCE_ARROW_SIZE" default="6.0"/>
            <visualProperty name="EDGE_BEND" default="0.728545744495502,-0.684997151948455,0.6456513365424503"/>
            <visualProperty name="EDGE_STROKE_SELECTED_PAINT" default="#FF0000"/>
            <visualProperty name="EDGE_SOURCE_ARROW_SHAPE" default="NONE"/>
            <visualProperty name="EDGE_LABEL" default=""/>
            <visualProperty name="EDGE_LINE_TYPE" default="SOLID"/>
            <visualProperty name="EDGE_TARGET_ARROW_SELECTED_PAINT" default="#FFFF00"/>
            <visualProperty name="EDGE_TARGET_ARROW_UNSELECTED_PAINT" default="#000000"/>
        </edge>
    </visualStyle>
    <visualStyle name="size_rank_1">
        <network>
            <visualProperty name="NETWORK_CENTER_X_LOCATION" default="0.0"/>
            <visualProperty name="NETWORK_CENTER_Y_LOCATION" default="0.0"/>
            <visualProperty name="NETWORK_NODE_SELECTION" default="true"/>
            <visualProperty name="NETWORK_DEPTH" default="0.0"/>
            <visualProperty name="NETWORK_BACKGROUND_PAINT" default="#EBEBEB"/>
            <visualProperty name="NETWORK_SCALE_FACTOR" default="1.0"/>
            <visualProperty name="NETWORK_HEIGHT" default="400.0"/>
            <visualProperty name="NETWORK_WIDTH" default="550.0"/>
            <visualProperty name="NETWORK_SIZE" default="550.0"/>
            <visualProperty name="NETWORK_TITLE" default=""/>
            <visualProperty name="NETWORK_EDGE_SELECTION" default="true"/>
            <visualProperty name="NETWORK_CENTER_Z_LOCATION" default="0.0"/>
        </network>
        <node>
            <dependency name="nodeCustomGraphicsSizeSync" value="true"/>
            <dependency name="nodeSizeLocked" value="true"/>
            <visualProperty name="NODE_Y_LOCATION" default="0.0"/>
            <visualProperty name="COMPOUND_NODE_PADDING" default="10.0"/>
            <visualProperty name="NODE_CUSTOMGRAPHICS_5" default="org.cytoscape.ding.customgraphics.NullCustomGraphics,0,[ Remove Graphics ],"/>
            <visualProperty name="COMPOUND_NODE_SHAPE" default="ROUND_RECTANGLE"/>
            <visualProperty name="NODE_CUSTOMPAINT_9" default="DefaultVisualizableVisualProperty(id=NODE_CUSTOMPAINT_9, name=Node Custom Paint 9)"/>
            <visualProperty name="NODE_CUSTOMGRAPHICS_POSITION_3" default="C,C,c,0.00,0.00"/>
            <visualProperty name="NODE_PAINT" default="#787878"/>
            <visualProperty name="NODE_CUSTOMGRAPHICS_SIZE_9" default="50.0"/>
            <visualProperty name="NODE_CUSTOMGRAPHICS_SIZE_1" default="50.0"/>
            <visualProperty name="NODE_BORDER_PAINT" default="#000000"/>
            <visualProperty name="NODE_CUSTOMGRAPHICS_1" default="org.cytoscape.ding.customgraphics.NullCustomGraphics,0,[ Remove Graphics ],"/>
            <visualProperty name="NODE_CUSTOMGRAPHICS_8" default="org.cytoscape.ding.customgraphics.NullCustomGraphics,0,[ Remove Graphics ],"/>
            <visualProperty name="NODE_TRANSPARENCY" default="255"/>
            <visualProperty name="NODE_CUSTOMGRAPHICS_SIZE_2" default="50.0"/>
            <visualProperty name="NODE_LABEL_POSITION" default="C,C,c,0.00,0.00"/>
            <visualProperty name="NODE_Z_LOCATION" default="0.0"/>
            <visualProperty name="NODE_CUSTOMPAINT_6" default="DefaultVisualizableVisualProperty(id=NODE_CUSTOMPAINT_6, name=Node Custom Paint 6)"/>
            <visualProperty name="NODE_CUSTOMGRAPHICS_POSITION_1" default="C,C,c,0.00,0.00"/>
            <visualProperty name="NODE_DEPTH" default="0.0"/>
            <visualProperty name="NODE_CUSTOMPAINT_2" default="DefaultVisualizableVisualProperty(id=NODE_CUSTOMPAINT_2, name=Node Custom Paint 2)"/>
            <visualProperty name="NODE_CUSTOMGRAPHICS_SIZE_7" default="50.0"/>
            <visualProperty name="NODE_X_LOCATION" default="0.0"/>
            <visualProperty name="NODE_LABEL_FONT_FACE" default="SansSerif.plain,plain,12"/>
            <visualProperty name="NODE_CUSTOMGRAPHICS_9" default="org.cytoscape.ding.customgraphics.NullCustomGraphics,0,[ Remove Graphics ],"/>
            <visualProperty name="NODE_BORDER_TRANSPARENCY" default="255"/>
            <visualProperty name="NODE_CUSTOMGRAPHICS_POSITION_2" default="C,C,c,0.00,0.00"/>
            <visualProperty name="NODE_CUSTOMGRAPHICS_6" default="org.cytoscape.ding.customgraphics.NullCustomGraphics,0,[ Remove Graphics ],"/>
            <visualProperty name="NODE_CUSTOMGRAPHICS_POSITION_6" default="C,C,c,0.00,0.00"/>
            <visualProperty name="NODE_CUSTOMPAINT_7" default="DefaultVisualizableVisualProperty(id=NODE_CUSTOMPAINT_7, name=Node Custom Paint 7)"/>
            <visualProperty name="NODE_LABEL_WIDTH" default="200.0"/>
            <visualProperty name="NODE_SELECTED_PAINT" default="#FFFF00"/>
            <visualProperty name="NODE_FILL_COLOR" default="#CCCCFF"/>
            <visualProperty name="NODE_CUSTOMGRAPHICS_2" default="org.cytoscape.ding.customgraphics.NullCustomGraphics,0,[ Remove Graphics ],"/>
            <visualProperty name="NODE_CUSTOMGRAPHICS_POSITION_4" default="C,C,c,0.00,0.00"/>
            <visualProperty name="NODE_TOOLTIP" default=""/>
            <visualProperty name="NODE_LABEL_TRANSPARENCY" default="255"/>
            <visualProperty name="NODE_WIDTH" default="50.0"/>
            <visualProperty name="NODE_CUSTOMGRAPHICS_POSITION_7" default="C,C,c,0.00,0.00"/>
            <visualProperty name="NODE_SHAPE" default="RECTANGLE"/>
            <visualProperty name="NODE_CUSTOMPAINT_5" default="DefaultVisualizableVisualProperty(id=NODE_CUSTOMPAINT_5, name=Node Custom Paint 5)"/>
            <visualProperty name="NODE_CUSTOMGRAPHICS_POSITION_9" default="C,C,c,0.00,0.00"/>
            <visualProperty name="NODE_CUSTOMGRAPHICS_4" default="org.cytoscape.ding.customgraphics.NullCustomGraphics,0,[ Remove Graphics ],"/>
            <visualProperty name="NODE_CUSTOMGRAPHICS_7" default="org.cytoscape.ding.customgraphics.NullCustomGraphics,0,[ Remove Graphics ],"/>
            <visualProperty name="NODE_CUSTOMGRAPHICS_3" default="org.cytoscape.ding.customgraphics.NullCustomGraphics,0,[ Remove Graphics ],"/>
            <visualProperty name="NODE_CUSTOMPAINT_3" default="DefaultVisualizableVisualProperty(id=NODE_CUSTOMPAINT_3, name=Node Custom Paint 3)"/>
            <visualProperty name="NODE_HEIGHT" default="50.0"/>
            <visualProperty name="NODE_SIZE" default="12.0">
                <continuousMapping attributeType="float" attributeName="diffusion_output__rank">
                    <continuousMappingPoint lesserValue="1.0" greaterValue="39.11245096536507" equalValue="39.11245096536507" attrValue="0.0"/>
                    <continuousMappingPoint lesserValue="13.821692732043733" greaterValue="1.0" equalValue="13.821692732043733" attrValue="99.0"/>
                </continuousMapping>
            </visualProperty>
            <visualProperty name="NODE_CUSTOMPAINT_1" default="DefaultVisualizableVisualProperty(id=NODE_CUSTOMPAINT_1, name=Node Custom Paint 1)"/>
            <visualProperty name="NODE_CUSTOMPAINT_8" default="DefaultVisualizableVisualProperty(id=NODE_CUSTOMPAINT_8, name=Node Custom Paint 8)"/>
            <visualProperty name="NODE_CUSTOMGRAPHICS_POSITION_8" default="C,C,c,0.00,0.00"/>
            <visualProperty name="NODE_SELECTED" default="false"/>
            <visualProperty name="NODE_CUSTOMGRAPHICS_SIZE_8" default="50.0"/>
            <visualProperty name="NODE_LABEL_COLOR" default="#333333"/>
            <visualProperty name="NODE_BORDER_STROKE" default="SOLID"/>
            <visualProperty name="NODE_CUSTOMGRAPHICS_SIZE_5" default="50.0"/>
            <visualProperty name="NODE_CUSTOMGRAPHICS_SIZE_4" default="50.0"/>
            <visualProperty name="NODE_VISIBLE" default="true"/>
            <visualProperty name="NODE_BORDER_WIDTH" default="0.0"/>
            <visualProperty name="NODE_LABEL_FONT_SIZE" default="9"/>
            <visualProperty name="NODE_CUSTOMGRAPHICS_SIZE_6" default="50.0"/>
            <visualProperty name="NODE_NESTED_NETWORK_IMAGE_VISIBLE" default="true"/>
            <visualProperty name="NODE_LABEL" default="">
                <passthroughMapping attributeType="string" attributeName="name"/>
            </visualProperty>
            <visualProperty name="NODE_CUSTOMPAINT_4" default="DefaultVisualizableVisualProperty(id=NODE_CUSTOMPAINT_4, name=Node Custom Paint 4)"/>
            <visualProperty name="NODE_CUSTOMGRAPHICS_SIZE_3" default="50.0"/>
            <visualProperty name="NODE_CUSTOMGRAPHICS_POSITION_5" default="C,C,c,0.00,0.00"/>
        </node>
        <edge>
            <dependency name="arrowColorMatchesEdge" value="false"/>
            <visualProperty name="EDGE_SELECTED" default="false"/>
            <visualProperty name="EDGE_SOURCE_ARROW_UNSELECTED_PAINT" default="#000000"/>
            <visualProperty name="EDGE_UNSELECTED_PAINT" default="#404040"/>
            <visualProperty name="EDGE_TOOLTIP" default=""/>
            <visualProperty name="EDGE_SOURCE_ARROW_SELECTED_PAINT" default="#FFFF00"/>
            <visualProperty name="EDGE_LABEL_TRANSPARENCY" default="255"/>
            <visualProperty name="EDGE_LABEL_FONT_FACE" default="SansSerif.plain,plain,10"/>
            <visualProperty name="EDGE_TARGET_ARROW_SHAPE" default="NONE"/>
            <visualProperty name="EDGE_LABEL_FONT_SIZE" default="10"/>
            <visualProperty name="EDGE_TARGET_ARROW_SIZE" default="6.0"/>
            <visualProperty name="EDGE_VISIBLE" default="true"/>
            <visualProperty name="EDGE_WIDTH" default="2.0"/>
            <visualProperty name="EDGE_TRANSPARENCY" default="255"/>
            <visualProperty name="EDGE_LABEL_WIDTH" default="200.0"/>
            <visualProperty name="EDGE_LABEL_COLOR" default="#000000"/>
            <visualProperty name="EDGE_STROKE_UNSELECTED_PAINT" default="#4C4C4C"/>
            <visualProperty name="EDGE_PAINT" default="#808080"/>
            <visualProperty name="EDGE_CURVED" default="true"/>
            <visualProperty name="EDGE_SOURCE_ARROW_SIZE" default="6.0"/>
            <visualProperty name="EDGE_BEND" default=""/>
            <visualProperty name="EDGE_STROKE_SELECTED_PAINT" default="#FF0000"/>
            <visualProperty name="EDGE_SOURCE_ARROW_SHAPE" default="NONE"/>
            <visualProperty name="EDGE_LABEL" default=""/>
            <visualProperty name="EDGE_SELECTED_PAINT" default="#FF0000"/>
            <visualProperty name="EDGE_LINE_TYPE" default="SOLID"/>
            <visualProperty name="EDGE_TARGET_ARROW_SELECTED_PAINT" default="#FFFF00"/>
            <visualProperty name="EDGE_TARGET_ARROW_UNSELECTED_PAINT" default="#000000"/>
        </edge>
    </visualStyle>
    <visualStyle name="Marquee">
        <network>
            <visualProperty name="NETWORK_CENTER_X_LOCATION" default="0.0"/>
            <visualProperty name="NETWORK_CENTER_Y_LOCATION" default="0.0"/>
            <visualProperty name="NETWORK_NODE_SELECTION" default="true"/>
            <visualProperty name="NETWORK_DEPTH" default="0.0"/>
            <visualProperty name="NETWORK_BACKGROUND_PAINT" default="#DCD7CA"/>
            <visualProperty name="NETWORK_SCALE_FACTOR" default="1.0"/>
            <visualProperty name="NETWORK_HEIGHT" default="400.0"/>
            <visualProperty name="NETWORK_WIDTH" default="550.0"/>
            <visualProperty name="NETWORK_SIZE" default="550.0"/>
            <visualProperty name="NETWORK_TITLE" default=""/>
            <visualProperty name="NETWORK_EDGE_SELECTION" default="true"/>
            <visualProperty name="NETWORK_CENTER_Z_LOCATION" default="0.0"/>
        </network>
        <node>
            <dependency name="nodeCustomGraphicsSizeSync" value="true"/>
            <dependency name="nodeSizeLocked" value="true"/>
            <visualProperty name="NODE_Y_LOCATION" default="0.0"/>
            <visualProperty name="COMPOUND_NODE_PADDING" default="10.0"/>
            <visualProperty name="NODE_CUSTOMGRAPHICS_5" default="org.cytoscape.ding.customgraphics.NullCustomGraphics,0,[ Remove Graphics ],"/>
            <visualProperty name="COMPOUND_NODE_SHAPE" default="ROUND_RECTANGLE"/>
            <visualProperty name="NODE_CUSTOMPAINT_9" default="DefaultVisualizableVisualProperty(id=NODE_CUSTOMPAINT_9, name=Node Custom Paint 9)"/>
            <visualProperty name="NODE_CUSTOMGRAPHICS_POSITION_3" default="C,C,c,0.00,0.00"/>
            <visualProperty name="NODE_PAINT" default="#787878"/>
            <visualProperty name="NODE_CUSTOMGRAPHICS_SIZE_9" default="50.0"/>
            <visualProperty name="NODE_CUSTOMGRAPHICS_SIZE_1" default="50.0"/>
            <visualProperty name="NODE_BORDER_PAINT" default="#FFFFFF"/>
            <visualProperty name="NODE_CUSTOMGRAPHICS_1" default="org.cytoscape.ding.customgraphics.NullCustomGraphics,0,[ Remove Graphics ],"/>
            <visualProperty name="NODE_CUSTOMGRAPHICS_8" default="org.cytoscape.ding.customgraphics.NullCustomGraphics,0,[ Remove Graphics ],"/>
            <visualProperty name="NODE_TRANSPARENCY" default="255"/>
            <visualProperty name="NODE_CUSTOMGRAPHICS_SIZE_2" default="50.0"/>
            <visualProperty name="NODE_LABEL_POSITION" default="S,N,c,0.00,0.00"/>
            <visualProperty name="NODE_Z_LOCATION" default="0.0"/>
            <visualProperty name="NODE_CUSTOMPAINT_6" default="DefaultVisualizableVisualProperty(id=NODE_CUSTOMPAINT_6, name=Node Custom Paint 6)"/>
            <visualProperty name="NODE_CUSTOMGRAPHICS_POSITION_1" default="C,C,c,0.00,0.00"/>
            <visualProperty name="NODE_DEPTH" default="0.0"/>
            <visualProperty name="NODE_CUSTOMPAINT_2" default="DefaultVisualizableVisualProperty(id=NODE_CUSTOMPAINT_2, name=Node Custom Paint 2)"/>
            <visualProperty name="NODE_CUSTOMGRAPHICS_SIZE_7" default="50.0"/>
            <visualProperty name="NODE_X_LOCATION" default="0.0"/>
            <visualProperty name="NODE_LABEL_FONT_FACE" default="SansSerif.plain,plain,12"/>
            <visualProperty name="NODE_CUSTOMGRAPHICS_9" default="org.cytoscape.ding.customgraphics.NullCustomGraphics,0,[ Remove Graphics ],"/>
            <visualProperty name="NODE_BORDER_TRANSPARENCY" default="255"/>
            <visualProperty name="NODE_CUSTOMGRAPHICS_POSITION_2" default="C,C,c,0.00,0.00"/>
            <visualProperty name="NODE_CUSTOMGRAPHICS_6" default="org.cytoscape.ding.customgraphics.NullCustomGraphics,0,[ Remove Graphics ],"/>
            <visualProperty name="NODE_CUSTOMGRAPHICS_POSITION_6" default="C,C,c,0.00,0.00"/>
            <visualProperty name="NODE_CUSTOMPAINT_7" default="DefaultVisualizableVisualProperty(id=NODE_CUSTOMPAINT_7, name=Node Custom Paint 7)"/>
            <visualProperty name="NODE_LABEL_WIDTH" default="200.0"/>
            <visualProperty name="NODE_SELECTED_PAINT" default="#FF0066"/>
            <visualProperty name="NODE_FILL_COLOR" default="#00CCFF"/>
            <visualProperty name="NODE_CUSTOMGRAPHICS_2" default="org.cytoscape.ding.customgraphics.NullCustomGraphics,0,[ Remove Graphics ],"/>
            <visualProperty name="NODE_CUSTOMGRAPHICS_POSITION_4" default="C,C,c,0.00,0.00"/>
            <visualProperty name="NODE_TOOLTIP" default=""/>
            <visualProperty name="NODE_LABEL_TRANSPARENCY" default="255"/>
            <visualProperty name="NODE_WIDTH" default="50.0"/>
            <visualProperty name="NODE_CUSTOMGRAPHICS_POSITION_7" default="C,C,c,0.00,0.00"/>
            <visualProperty name="NODE_SHAPE" default="ELLIPSE"/>
            <visualProperty name="NODE_CUSTOMPAINT_5" default="DefaultVisualizableVisualProperty(id=NODE_CUSTOMPAINT_5, name=Node Custom Paint 5)"/>
            <visualProperty name="NODE_CUSTOMGRAPHICS_POSITION_9" default="C,C,c,0.00,0.00"/>
            <visualProperty name="NODE_CUSTOMGRAPHICS_4" default="org.cytoscape.ding.customgraphics.NullCustomGraphics,0,[ Remove Graphics ],"/>
            <visualProperty name="NODE_CUSTOMGRAPHICS_7" default="org.cytoscape.ding.customgraphics.NullCustomGraphics,0,[ Remove Graphics ],"/>
            <visualProperty name="NODE_CUSTOMGRAPHICS_3" default="org.cytoscape.ding.customgraphics.NullCustomGraphics,0,[ Remove Graphics ],"/>
            <visualProperty name="NODE_CUSTOMPAINT_3" default="DefaultVisualizableVisualProperty(id=NODE_CUSTOMPAINT_3, name=Node Custom Paint 3)"/>
            <visualProperty name="NODE_HEIGHT" default="50.0"/>
            <visualProperty name="NODE_SIZE" default="20.0"/>
            <visualProperty name="NODE_CUSTOMPAINT_1" default="DefaultVisualizableVisualProperty(id=NODE_CUSTOMPAINT_1, name=Node Custom Paint 1)"/>
            <visualProperty name="NODE_CUSTOMPAINT_8" default="DefaultVisualizableVisualProperty(id=NODE_CUSTOMPAINT_8, name=Node Custom Paint 8)"/>
            <visualProperty name="NODE_CUSTOMGRAPHICS_POSITION_8" default="C,C,c,0.00,0.00"/>
            <visualProperty name="NODE_SELECTED" default="false"/>
            <visualProperty name="NODE_CUSTOMGRAPHICS_SIZE_8" default="50.0"/>
            <visualProperty name="NODE_LABEL_COLOR" default="#666666"/>
            <visualProperty name="NODE_BORDER_STROKE" default="SOLID"/>
            <visualProperty name="NODE_CUSTOMGRAPHICS_SIZE_5" default="50.0"/>
            <visualProperty name="NODE_CUSTOMGRAPHICS_SIZE_4" default="50.0"/>
            <visualProperty name="NODE_VISIBLE" default="true"/>
            <visualProperty name="NODE_BORDER_WIDTH" default="10.0"/>
            <visualProperty name="NODE_LABEL_FONT_SIZE" default="12"/>
            <visualProperty name="NODE_CUSTOMGRAPHICS_SIZE_6" default="50.0"/>
            <visualProperty name="NODE_NESTED_NETWORK_IMAGE_VISIBLE" default="true"/>
            <visualProperty name="NODE_LABEL" default="">
                <passthroughMapping attributeType="string" attributeName="name"/>
            </visualProperty>
            <visualProperty name="NODE_CUSTOMPAINT_4" default="DefaultVisualizableVisualProperty(id=NODE_CUSTOMPAINT_4, name=Node Custom Paint 4)"/>
            <visualProperty name="NODE_CUSTOMGRAPHICS_SIZE_3" default="50.0"/>
            <visualProperty name="NODE_CUSTOMGRAPHICS_POSITION_5" default="C,C,c,0.00,0.00"/>
        </node>
        <edge>
            <dependency name="arrowColorMatchesEdge" value="true"/>
            <visualProperty name="EDGE_SELECTED" default="false"/>
            <visualProperty name="EDGE_SOURCE_ARROW_UNSELECTED_PAINT" default="#000000"/>
            <visualProperty name="EDGE_UNSELECTED_PAINT" default="#FFFFFF"/>
            <visualProperty name="EDGE_TOOLTIP" default=""/>
            <visualProperty name="EDGE_SOURCE_ARROW_SELECTED_PAINT" default="#FFFF00"/>
            <visualProperty name="EDGE_LABEL_TRANSPARENCY" default="255"/>
            <visualProperty name="EDGE_LABEL_FONT_FACE" default="SansSerif.plain,plain,12"/>
            <visualProperty name="EDGE_TARGET_ARROW_SHAPE" default="ARROW"/>
            <visualProperty name="EDGE_LABEL_FONT_SIZE" default="8"/>
            <visualProperty name="EDGE_TARGET_ARROW_SIZE" default="6.0"/>
            <visualProperty name="EDGE_VISIBLE" default="true"/>
            <visualProperty name="EDGE_WIDTH" default="2.0"/>
            <visualProperty name="EDGE_TRANSPARENCY" default="255"/>
            <visualProperty name="EDGE_LABEL_WIDTH" default="200.0"/>
            <visualProperty name="EDGE_LABEL_COLOR" default="#666666"/>
            <visualProperty name="EDGE_STROKE_UNSELECTED_PAINT" default="#969696"/>
            <visualProperty name="EDGE_PAINT" default="#808080"/>
            <visualProperty name="EDGE_CURVED" default="true"/>
            <visualProperty name="EDGE_SOURCE_ARROW_SIZE" default="6.0"/>
            <visualProperty name="EDGE_BEND" default=""/>
            <visualProperty name="EDGE_STROKE_SELECTED_PAINT" default="#FF0000"/>
            <visualProperty name="EDGE_SOURCE_ARROW_SHAPE" default="NONE"/>
            <visualProperty name="EDGE_LABEL" default="">
                <passthroughMapping attributeType="string" attributeName="interaction"/>
            </visualProperty>
            <visualProperty name="EDGE_SELECTED_PAINT" default="#FF0000"/>
            <visualProperty name="EDGE_LINE_TYPE" default="MARQUEE_EQUAL"/>
            <visualProperty name="EDGE_TARGET_ARROW_SELECTED_PAINT" default="#FFFF00"/>
            <visualProperty name="EDGE_TARGET_ARROW_UNSELECTED_PAINT" default="#333333"/>
        </edge>
    </visualStyle>
    <visualStyle name="Sample2">
        <network>
            <visualProperty name="NETWORK_CENTER_X_LOCATION" default="0.0"/>
            <visualProperty name="NETWORK_CENTER_Y_LOCATION" default="0.0"/>
            <visualProperty name="NETWORK_NODE_SELECTION" default="true"/>
            <visualProperty name="NETWORK_DEPTH" default="0.0"/>
            <visualProperty name="NETWORK_BACKGROUND_PAINT" default="#EBE8E1"/>
            <visualProperty name="NETWORK_SCALE_FACTOR" default="1.0"/>
            <visualProperty name="NETWORK_HEIGHT" default="400.0"/>
            <visualProperty name="NETWORK_WIDTH" default="550.0"/>
            <visualProperty name="NETWORK_TITLE" default=""/>
            <visualProperty name="NETWORK_EDGE_SELECTION" default="true"/>
            <visualProperty name="NETWORK_CENTER_Z_LOCATION" default="0.0"/>
        </network>
        <node>
            <dependency name="nodeCustomGraphicsSizeSync" value="true"/>
            <dependency name="nodeSizeLocked" value="true"/>
            <visualProperty name="NODE_Y_LOCATION" default="0.0"/>
            <visualProperty name="COMPOUND_NODE_PADDING" default="10.0"/>
            <visualProperty name="NODE_CUSTOMGRAPHICS_5" default="org.cytoscape.ding.customgraphics.NullCustomGraphics,0,[ Remove Graphics ],"/>
            <visualProperty name="COMPOUND_NODE_SHAPE" default="ROUND_RECTANGLE"/>
            <visualProperty name="NODE_CUSTOMGRAPHICS_POSITION_3" default="C,C,c,0.00,0.00"/>
            <visualProperty name="NODE_CUSTOMGRAPHICS_SIZE_9" default="0.0"/>
            <visualProperty name="NODE_CUSTOMGRAPHICS_SIZE_1" default="0.0"/>
            <visualProperty name="NODE_BORDER_PAINT" default="#FFFFFF"/>
            <visualProperty name="NODE_CUSTOMGRAPHICS_1" default="org.cytoscape.ding.customgraphics.NullCustomGraphics,0,[ Remove Graphics ],"/>
            <visualProperty name="NODE_CUSTOMGRAPHICS_8" default="org.cytoscape.ding.customgraphics.NullCustomGraphics,0,[ Remove Graphics ],"/>
            <visualProperty name="NODE_TRANSPARENCY" default="255"/>
            <visualProperty name="NODE_CUSTOMGRAPHICS_SIZE_2" default="0.0"/>
            <visualProperty name="NODE_LABEL_POSITION" default="E,W,c,5.00,0.00"/>
            <visualProperty name="NODE_Z_LOCATION" default="0.0"/>
            <visualProperty name="NODE_CUSTOMGRAPHICS_POSITION_1" default="C,C,c,0.00,0.00"/>
            <visualProperty name="NODE_DEPTH" default="0.0"/>
            <visualProperty name="NODE_CUSTOMGRAPHICS_SIZE_7" default="0.0"/>
            <visualProperty name="NODE_X_LOCATION" default="0.0"/>
            <visualProperty name="NODE_LABEL_FONT_FACE" default="Dialog.plain,plain,12"/>
            <visualProperty name="NODE_CUSTOMGRAPHICS_9" default="org.cytoscape.ding.customgraphics.NullCustomGraphics,0,[ Remove Graphics ],"/>
            <visualProperty name="NODE_BORDER_TRANSPARENCY" default="255"/>
            <visualProperty name="NODE_CUSTOMGRAPHICS_POSITION_2" default="C,C,c,0.00,0.00"/>
            <visualProperty name="NODE_CUSTOMGRAPHICS_6" default="org.cytoscape.ding.customgraphics.NullCustomGraphics,0,[ Remove Graphics ],"/>
            <visualProperty name="NODE_CUSTOMGRAPHICS_POSITION_6" default="C,C,c,0.00,0.00"/>
            <visualProperty name="NODE_LABEL_WIDTH" default="200.0"/>
            <visualProperty name="NODE_SELECTED_PAINT" default="#FFFF00"/>
            <visualProperty name="NODE_FILL_COLOR" default="#3A7FB6"/>
            <visualProperty name="NODE_CUSTOMGRAPHICS_2" default="org.cytoscape.ding.customgraphics.NullCustomGraphics,0,[ Remove Graphics ],"/>
            <visualProperty name="NODE_CUSTOMGRAPHICS_POSITION_4" default="C,C,c,0.00,0.00"/>
            <visualProperty name="NODE_TOOLTIP" default=""/>
            <visualProperty name="NODE_LABEL_TRANSPARENCY" default="255"/>
            <visualProperty name="NODE_WIDTH" default="60.0"/>
            <visualProperty name="NODE_CUSTOMGRAPHICS_POSITION_7" default="C,C,c,0.00,0.00"/>
            <visualProperty name="NODE_SHAPE" default="ELLIPSE"/>
            <visualProperty name="NODE_CUSTOMGRAPHICS_POSITION_9" default="C,C,c,0.00,0.00"/>
            <visualProperty name="NODE_CUSTOMGRAPHICS_4" default="org.cytoscape.ding.customgraphics.NullCustomGraphics,0,[ Remove Graphics ],"/>
            <visualProperty name="NODE_CUSTOMGRAPHICS_7" default="org.cytoscape.ding.customgraphics.NullCustomGraphics,0,[ Remove Graphics ],"/>
            <visualProperty name="NODE_CUSTOMGRAPHICS_3" default="org.cytoscape.ding.customgraphics.NullCustomGraphics,0,[ Remove Graphics ],"/>
            <visualProperty name="NODE_HEIGHT" default="40.0"/>
            <visualProperty name="NODE_SIZE" default="50.0"/>
            <visualProperty name="NODE_CUSTOMGRAPHICS_POSITION_8" default="C,C,c,0.00,0.00"/>
            <visualProperty name="NODE_SELECTED" default="false"/>
            <visualProperty name="NODE_CUSTOMGRAPHICS_SIZE_8" default="0.0"/>
            <visualProperty name="NODE_LABEL_COLOR" default="#666666"/>
            <visualProperty name="NODE_BORDER_STROKE" default="SOLID"/>
            <visualProperty name="NODE_CUSTOMGRAPHICS_SIZE_5" default="0.0"/>
            <visualProperty name="NODE_CUSTOMGRAPHICS_SIZE_4" default="0.0"/>
            <visualProperty name="NODE_VISIBLE" default="true"/>
            <visualProperty name="NODE_BORDER_WIDTH" default="15.0"/>
            <visualProperty name="NODE_LABEL_FONT_SIZE" default="20"/>
            <visualProperty name="NODE_CUSTOMGRAPHICS_SIZE_6" default="0.0"/>
            <visualProperty name="NODE_NESTED_NETWORK_IMAGE_VISIBLE" default="true"/>
            <visualProperty name="NODE_LABEL" default="">
                <passthroughMapping attributeType="string" attributeName="name"/>
            </visualProperty>
            <visualProperty name="NODE_CUSTOMGRAPHICS_SIZE_3" default="0.0"/>
            <visualProperty name="NODE_CUSTOMGRAPHICS_POSITION_5" default="C,C,c,0.00,0.00"/>
        </node>
        <edge>
            <dependency name="arrowColorMatchesEdge" value="false"/>
            <visualProperty name="EDGE_SELECTED" default="false"/>
            <visualProperty name="EDGE_SOURCE_ARROW_UNSELECTED_PAINT" default="#000000"/>
            <visualProperty name="EDGE_TOOLTIP" default=""/>
            <visualProperty name="EDGE_SOURCE_ARROW_SELECTED_PAINT" default="#FFFF00"/>
            <visualProperty name="EDGE_LABEL_TRANSPARENCY" default="255"/>
            <visualProperty name="EDGE_LABEL_FONT_FACE" default="SansSerif.plain,plain,10"/>
            <visualProperty name="EDGE_TARGET_ARROW_SHAPE" default="NONE"/>
            <visualProperty name="EDGE_LABEL_FONT_SIZE" default="10"/>
            <visualProperty name="EDGE_TARGET_ARROW_SIZE" default="6.0"/>
            <visualProperty name="EDGE_VISIBLE" default="true"/>
            <visualProperty name="EDGE_WIDTH" default="20.0"/>
            <visualProperty name="EDGE_TRANSPARENCY" default="255"/>
            <visualProperty name="EDGE_LABEL_WIDTH" default="200.0"/>
            <visualProperty name="EDGE_LABEL_COLOR" default="#000000"/>
            <visualProperty name="EDGE_STROKE_UNSELECTED_PAINT" default="#FFFFFF"/>
            <visualProperty name="EDGE_CURVED" default="true"/>
            <visualProperty name="EDGE_SOURCE_ARROW_SIZE" default="6.0"/>
            <visualProperty name="EDGE_STROKE_SELECTED_PAINT" default="#FF0000"/>
            <visualProperty name="EDGE_SOURCE_ARROW_SHAPE" default="NONE"/>
            <visualProperty name="EDGE_LABEL" default=""/>
            <visualProperty name="EDGE_LINE_TYPE" default="SOLID"/>
            <visualProperty name="EDGE_TARGET_ARROW_SELECTED_PAINT" default="#FFFF00"/>
            <visualProperty name="EDGE_TARGET_ARROW_UNSELECTED_PAINT" default="#000000"/>
        </edge>
    </visualStyle>
    <visualStyle name="default black">
        <network>
            <visualProperty name="NETWORK_CENTER_X_LOCATION" default="0.0"/>
            <visualProperty name="NETWORK_CENTER_Y_LOCATION" default="0.0"/>
            <visualProperty name="NETWORK_NODE_SELECTION" default="true"/>
            <visualProperty name="NETWORK_DEPTH" default="0.0"/>
            <visualProperty name="NETWORK_BACKGROUND_PAINT" default="#000000"/>
            <visualProperty name="NETWORK_SCALE_FACTOR" default="1.0"/>
            <visualProperty name="NETWORK_HEIGHT" default="400.0"/>
            <visualProperty name="NETWORK_WIDTH" default="550.0"/>
            <visualProperty name="NETWORK_SIZE" default="550.0"/>
            <visualProperty name="NETWORK_TITLE" default=""/>
            <visualProperty name="NETWORK_EDGE_SELECTION" default="true"/>
            <visualProperty name="NETWORK_CENTER_Z_LOCATION" default="0.0"/>
        </network>
        <node>
            <dependency name="nodeCustomGraphicsSizeSync" value="true"/>
            <dependency name="nodeSizeLocked" value="true"/>
            <visualProperty name="NODE_Y_LOCATION" default="0.0"/>
            <visualProperty name="COMPOUND_NODE_PADDING" default="10.0"/>
            <visualProperty name="NODE_CUSTOMGRAPHICS_5" default="org.cytoscape.ding.customgraphics.NullCustomGraphics,0,[ Remove Graphics ],"/>
            <visualProperty name="COMPOUND_NODE_SHAPE" default="ROUND_RECTANGLE"/>
            <visualProperty name="NODE_CUSTOMPAINT_9" default="DefaultVisualizableVisualProperty(id=NODE_CUSTOMPAINT_9, name=Node Custom Paint 9)"/>
            <visualProperty name="NODE_CUSTOMGRAPHICS_POSITION_3" default="C,C,c,0.00,0.00"/>
            <visualProperty name="NODE_PAINT" default="#1E90FF"/>
            <visualProperty name="NODE_CUSTOMGRAPHICS_SIZE_9" default="50.0"/>
            <visualProperty name="NODE_CUSTOMGRAPHICS_SIZE_1" default="50.0"/>
            <visualProperty name="NODE_BORDER_PAINT" default="#009900"/>
            <visualProperty name="NODE_CUSTOMGRAPHICS_1" default="org.cytoscape.ding.customgraphics.NullCustomGraphics,0,[ Remove Graphics ],"/>
            <visualProperty name="NODE_CUSTOMGRAPHICS_8" default="org.cytoscape.ding.customgraphics.NullCustomGraphics,0,[ Remove Graphics ],"/>
            <visualProperty name="NODE_TRANSPARENCY" default="255"/>
            <visualProperty name="NODE_CUSTOMGRAPHICS_SIZE_2" default="50.0"/>
            <visualProperty name="NODE_LABEL_POSITION" default="S,NW,c,0.00,0.00"/>
            <visualProperty name="NODE_Z_LOCATION" default="0.0"/>
            <visualProperty name="NODE_CUSTOMPAINT_6" default="DefaultVisualizableVisualProperty(id=NODE_CUSTOMPAINT_6, name=Node Custom Paint 6)"/>
            <visualProperty name="NODE_CUSTOMGRAPHICS_POSITION_1" default="C,C,c,0.00,0.00"/>
            <visualProperty name="NODE_DEPTH" default="0.0"/>
            <visualProperty name="NODE_CUSTOMPAINT_2" default="DefaultVisualizableVisualProperty(id=NODE_CUSTOMPAINT_2, name=Node Custom Paint 2)"/>
            <visualProperty name="NODE_CUSTOMGRAPHICS_SIZE_7" default="50.0"/>
            <visualProperty name="NODE_X_LOCATION" default="0.0"/>
            <visualProperty name="NODE_LABEL_FONT_FACE" default="SansSerif.plain,plain,12"/>
            <visualProperty name="NODE_CUSTOMGRAPHICS_9" default="org.cytoscape.ding.customgraphics.NullCustomGraphics,0,[ Remove Graphics ],"/>
            <visualProperty name="NODE_BORDER_TRANSPARENCY" default="255"/>
            <visualProperty name="NODE_CUSTOMGRAPHICS_POSITION_2" default="C,C,c,0.00,0.00"/>
            <visualProperty name="NODE_CUSTOMGRAPHICS_6" default="org.cytoscape.ding.customgraphics.NullCustomGraphics,0,[ Remove Graphics ],"/>
            <visualProperty name="NODE_CUSTOMGRAPHICS_POSITION_6" default="C,C,c,0.00,0.00"/>
            <visualProperty name="NODE_CUSTOMPAINT_7" default="DefaultVisualizableVisualProperty(id=NODE_CUSTOMPAINT_7, name=Node Custom Paint 7)"/>
            <visualProperty name="NODE_LABEL_WIDTH" default="200.0"/>
            <visualProperty name="NODE_SELECTED_PAINT" default="#FFFF00"/>
            <visualProperty name="NODE_FILL_COLOR" default="#FFFFFF"/>
            <visualProperty name="NODE_CUSTOMGRAPHICS_2" default="org.cytoscape.ding.customgraphics.NullCustomGraphics,0,[ Remove Graphics ],"/>
            <visualProperty name="NODE_CUSTOMGRAPHICS_POSITION_4" default="C,C,c,0.00,0.00"/>
            <visualProperty name="NODE_TOOLTIP" default=""/>
            <visualProperty name="NODE_LABEL_TRANSPARENCY" default="255"/>
            <visualProperty name="NODE_WIDTH" default="70.0"/>
            <visualProperty name="NODE_CUSTOMGRAPHICS_POSITION_7" default="C,C,c,0.00,0.00"/>
            <visualProperty name="NODE_SHAPE" default="ELLIPSE"/>
            <visualProperty name="NODE_CUSTOMPAINT_5" default="DefaultVisualizableVisualProperty(id=NODE_CUSTOMPAINT_5, name=Node Custom Paint 5)"/>
            <visualProperty name="NODE_CUSTOMGRAPHICS_POSITION_9" default="C,C,c,0.00,0.00"/>
            <visualProperty name="NODE_CUSTOMGRAPHICS_4" default="org.cytoscape.ding.customgraphics.NullCustomGraphics,0,[ Remove Graphics ],"/>
            <visualProperty name="NODE_CUSTOMGRAPHICS_7" default="org.cytoscape.ding.customgraphics.NullCustomGraphics,0,[ Remove Graphics ],"/>
            <visualProperty name="NODE_CUSTOMGRAPHICS_3" default="org.cytoscape.ding.customgraphics.NullCustomGraphics,0,[ Remove Graphics ],"/>
            <visualProperty name="NODE_CUSTOMPAINT_3" default="DefaultVisualizableVisualProperty(id=NODE_CUSTOMPAINT_3, name=Node Custom Paint 3)"/>
            <visualProperty name="NODE_HEIGHT" default="30.0"/>
            <visualProperty name="NODE_SIZE" default="15.0"/>
            <visualProperty name="NODE_CUSTOMPAINT_1" default="DefaultVisualizableVisualProperty(id=NODE_CUSTOMPAINT_1, name=Node Custom Paint 1)"/>
            <visualProperty name="NODE_CUSTOMPAINT_8" default="DefaultVisualizableVisualProperty(id=NODE_CUSTOMPAINT_8, name=Node Custom Paint 8)"/>
            <visualProperty name="NODE_CUSTOMGRAPHICS_POSITION_8" default="C,C,c,0.00,0.00"/>
            <visualProperty name="NODE_SELECTED" default="false"/>
            <visualProperty name="NODE_CUSTOMGRAPHICS_SIZE_8" default="50.0"/>
            <visualProperty name="NODE_LABEL_COLOR" default="#CCCCCC"/>
            <visualProperty name="NODE_BORDER_STROKE" default="SOLID"/>
            <visualProperty name="NODE_CUSTOMGRAPHICS_SIZE_5" default="50.0"/>
            <visualProperty name="NODE_CUSTOMGRAPHICS_SIZE_4" default="50.0"/>
            <visualProperty name="NODE_VISIBLE" default="true"/>
            <visualProperty name="NODE_BORDER_WIDTH" default="0.0"/>
            <visualProperty name="NODE_LABEL_FONT_SIZE" default="12"/>
            <visualProperty name="NODE_CUSTOMGRAPHICS_SIZE_6" default="50.0"/>
            <visualProperty name="NODE_NESTED_NETWORK_IMAGE_VISIBLE" default="true"/>
            <visualProperty name="NODE_LABEL" default="">
                <passthroughMapping attributeType="string" attributeName="name"/>
            </visualProperty>
            <visualProperty name="NODE_CUSTOMPAINT_4" default="DefaultVisualizableVisualProperty(id=NODE_CUSTOMPAINT_4, name=Node Custom Paint 4)"/>
            <visualProperty name="NODE_CUSTOMGRAPHICS_SIZE_3" default="50.0"/>
            <visualProperty name="NODE_CUSTOMGRAPHICS_POSITION_5" default="C,C,c,0.00,0.00"/>
        </node>
        <edge>
            <dependency name="arrowColorMatchesEdge" value="false"/>
            <visualProperty name="EDGE_SELECTED" default="false"/>
            <visualProperty name="EDGE_SOURCE_ARROW_UNSELECTED_PAINT" default="#000000"/>
            <visualProperty name="EDGE_UNSELECTED_PAINT" default="#404040"/>
            <visualProperty name="EDGE_TOOLTIP" default=""/>
            <visualProperty name="EDGE_SOURCE_ARROW_SELECTED_PAINT" default="#FFFF00"/>
            <visualProperty name="EDGE_LABEL_TRANSPARENCY" default="255"/>
            <visualProperty name="EDGE_LABEL_FONT_FACE" default="Dialog.plain,plain,10"/>
            <visualProperty name="EDGE_TARGET_ARROW_SHAPE" default="NONE"/>
            <visualProperty name="EDGE_LABEL_FONT_SIZE" default="10"/>
            <visualProperty name="EDGE_TARGET_ARROW_SIZE" default="6.0"/>
            <visualProperty name="EDGE_VISIBLE" default="true"/>
            <visualProperty name="EDGE_WIDTH" default="2.0"/>
            <visualProperty name="EDGE_TRANSPARENCY" default="255"/>
            <visualProperty name="EDGE_LABEL_WIDTH" default="200.0"/>
            <visualProperty name="EDGE_LABEL_COLOR" default="#000000"/>
            <visualProperty name="EDGE_STROKE_UNSELECTED_PAINT" default="#009900"/>
            <visualProperty name="EDGE_PAINT" default="#323232"/>
            <visualProperty name="EDGE_CURVED" default="true"/>
            <visualProperty name="EDGE_SOURCE_ARROW_SIZE" default="6.0"/>
            <visualProperty name="EDGE_BEND" default=""/>
            <visualProperty name="EDGE_STROKE_SELECTED_PAINT" default="#FF0000"/>
            <visualProperty name="EDGE_SOURCE_ARROW_SHAPE" default="NONE"/>
            <visualProperty name="EDGE_LABEL" default=""/>
            <visualProperty name="EDGE_SELECTED_PAINT" default="#FF0000"/>
            <visualProperty name="EDGE_LINE_TYPE" default="SOLID"/>
            <visualProperty name="EDGE_TARGET_ARROW_SELECTED_PAINT" default="#FFFF00"/>
            <visualProperty name="EDGE_TARGET_ARROW_UNSELECTED_PAINT" default="#000000"/>
        </edge>
    </visualStyle>
    <visualStyle name="Sample1">
        <network>
            <visualProperty name="NETWORK_CENTER_X_LOCATION" default="0.0"/>
            <visualProperty name="NETWORK_CENTER_Y_LOCATION" default="0.0"/>
            <visualProperty name="NETWORK_NODE_SELECTION" default="true"/>
            <visualProperty name="NETWORK_DEPTH" default="0.0"/>
            <visualProperty name="NETWORK_BACKGROUND_PAINT" default="#FFFFFF"/>
            <visualProperty name="NETWORK_SCALE_FACTOR" default="1.0"/>
            <visualProperty name="NETWORK_HEIGHT" default="400.0"/>
            <visualProperty name="NETWORK_WIDTH" default="550.0"/>
            <visualProperty name="NETWORK_SIZE" default="550.0"/>
            <visualProperty name="NETWORK_TITLE" default=""/>
            <visualProperty name="NETWORK_EDGE_SELECTION" default="true"/>
            <visualProperty name="NETWORK_CENTER_Z_LOCATION" default="0.0"/>
        </network>
        <node>
            <dependency name="nodeCustomGraphicsSizeSync" value="true"/>
            <dependency name="nodeSizeLocked" value="true"/>
            <visualProperty name="NODE_Y_LOCATION" default="0.0"/>
            <visualProperty name="COMPOUND_NODE_PADDING" default="10.0"/>
            <visualProperty name="NODE_CUSTOMGRAPHICS_5" default="org.cytoscape.ding.customgraphics.NullCustomGraphics,0,[ Remove Graphics ],"/>
            <visualProperty name="COMPOUND_NODE_SHAPE" default="ROUND_RECTANGLE"/>
            <visualProperty name="NODE_CUSTOMPAINT_9" default="DefaultVisualizableVisualProperty(id=NODE_CUSTOMPAINT_9, name=Node Custom Paint 9)"/>
            <visualProperty name="NODE_CUSTOMGRAPHICS_POSITION_3" default="C,C,c,0.00,0.00"/>
            <visualProperty name="NODE_PAINT" default="#787878"/>
            <visualProperty name="NODE_CUSTOMGRAPHICS_SIZE_9" default="50.0"/>
            <visualProperty name="NODE_CUSTOMGRAPHICS_SIZE_1" default="50.0"/>
            <visualProperty name="NODE_BORDER_PAINT" default="#000000"/>
            <visualProperty name="NODE_CUSTOMGRAPHICS_1" default="org.cytoscape.ding.customgraphics.NullCustomGraphics,0,[ Remove Graphics ],"/>
            <visualProperty name="NODE_CUSTOMGRAPHICS_8" default="org.cytoscape.ding.customgraphics.NullCustomGraphics,0,[ Remove Graphics ],"/>
            <visualProperty name="NODE_TRANSPARENCY" default="255"/>
            <visualProperty name="NODE_CUSTOMGRAPHICS_SIZE_2" default="50.0"/>
            <visualProperty name="NODE_LABEL_POSITION" default="C,C,c,0.00,0.00"/>
            <visualProperty name="NODE_Z_LOCATION" default="0.0"/>
            <visualProperty name="NODE_CUSTOMPAINT_6" default="DefaultVisualizableVisualProperty(id=NODE_CUSTOMPAINT_6, name=Node Custom Paint 6)"/>
            <visualProperty name="NODE_CUSTOMGRAPHICS_POSITION_1" default="C,C,c,0.00,0.00"/>
            <visualProperty name="NODE_DEPTH" default="0.0"/>
            <visualProperty name="NODE_CUSTOMPAINT_2" default="DefaultVisualizableVisualProperty(id=NODE_CUSTOMPAINT_2, name=Node Custom Paint 2)"/>
            <visualProperty name="NODE_CUSTOMGRAPHICS_SIZE_7" default="50.0"/>
            <visualProperty name="NODE_X_LOCATION" default="0.0"/>
            <visualProperty name="NODE_LABEL_FONT_FACE" default="Dialog.plain,plain,12"/>
            <visualProperty name="NODE_CUSTOMGRAPHICS_9" default="org.cytoscape.ding.customgraphics.NullCustomGraphics,0,[ Remove Graphics ],"/>
            <visualProperty name="NODE_BORDER_TRANSPARENCY" default="255"/>
            <visualProperty name="NODE_CUSTOMGRAPHICS_POSITION_2" default="C,C,c,0.00,0.00"/>
            <visualProperty name="NODE_CUSTOMGRAPHICS_6" default="org.cytoscape.ding.customgraphics.NullCustomGraphics,0,[ Remove Graphics ],"/>
            <visualProperty name="NODE_CUSTOMGRAPHICS_POSITION_6" default="C,C,c,0.00,0.00"/>
            <visualProperty name="NODE_CUSTOMPAINT_7" default="DefaultVisualizableVisualProperty(id=NODE_CUSTOMPAINT_7, name=Node Custom Paint 7)"/>
            <visualProperty name="NODE_LABEL_WIDTH" default="200.0"/>
            <visualProperty name="NODE_SELECTED_PAINT" default="#FFFF00"/>
            <visualProperty name="NODE_FILL_COLOR" default="#7FCDBB"/>
            <visualProperty name="NODE_CUSTOMGRAPHICS_2" default="org.cytoscape.ding.customgraphics.NullCustomGraphics,0,[ Remove Graphics ],"/>
            <visualProperty name="NODE_CUSTOMGRAPHICS_POSITION_4" default="C,C,c,0.00,0.00"/>
            <visualProperty name="NODE_TOOLTIP" default=""/>
            <visualProperty name="NODE_LABEL_TRANSPARENCY" default="255"/>
            <visualProperty name="NODE_WIDTH" default="70.0"/>
            <visualProperty name="NODE_CUSTOMGRAPHICS_POSITION_7" default="C,C,c,0.00,0.00"/>
            <visualProperty name="NODE_SHAPE" default="ELLIPSE"/>
            <visualProperty name="NODE_CUSTOMPAINT_5" default="DefaultVisualizableVisualProperty(id=NODE_CUSTOMPAINT_5, name=Node Custom Paint 5)"/>
            <visualProperty name="NODE_CUSTOMGRAPHICS_POSITION_9" default="C,C,c,0.00,0.00"/>
            <visualProperty name="NODE_CUSTOMGRAPHICS_4" default="org.cytoscape.ding.customgraphics.NullCustomGraphics,0,[ Remove Graphics ],"/>
            <visualProperty name="NODE_CUSTOMGRAPHICS_7" default="org.cytoscape.ding.customgraphics.NullCustomGraphics,0,[ Remove Graphics ],"/>
            <visualProperty name="NODE_CUSTOMGRAPHICS_3" default="org.cytoscape.ding.customgraphics.NullCustomGraphics,0,[ Remove Graphics ],"/>
            <visualProperty name="NODE_CUSTOMPAINT_3" default="DefaultVisualizableVisualProperty(id=NODE_CUSTOMPAINT_3, name=Node Custom Paint 3)"/>
            <visualProperty name="NODE_HEIGHT" default="30.0"/>
            <visualProperty name="NODE_SIZE" default="25.0"/>
            <visualProperty name="NODE_CUSTOMPAINT_1" default="DefaultVisualizableVisualProperty(id=NODE_CUSTOMPAINT_1, name=Node Custom Paint 1)"/>
            <visualProperty name="NODE_CUSTOMPAINT_8" default="DefaultVisualizableVisualProperty(id=NODE_CUSTOMPAINT_8, name=Node Custom Paint 8)"/>
            <visualProperty name="NODE_CUSTOMGRAPHICS_POSITION_8" default="C,C,c,0.00,0.00"/>
            <visualProperty name="NODE_SELECTED" default="false"/>
            <visualProperty name="NODE_CUSTOMGRAPHICS_SIZE_8" default="50.0"/>
            <visualProperty name="NODE_LABEL_COLOR" default="#333333"/>
            <visualProperty name="NODE_BORDER_STROKE" default="SOLID"/>
            <visualProperty name="NODE_CUSTOMGRAPHICS_SIZE_5" default="50.0"/>
            <visualProperty name="NODE_CUSTOMGRAPHICS_SIZE_4" default="50.0"/>
            <visualProperty name="NODE_VISIBLE" default="true"/>
            <visualProperty name="NODE_BORDER_WIDTH" default="0.0"/>
            <visualProperty name="NODE_LABEL_FONT_SIZE" default="10"/>
            <visualProperty name="NODE_CUSTOMGRAPHICS_SIZE_6" default="50.0"/>
            <visualProperty name="NODE_NESTED_NETWORK_IMAGE_VISIBLE" default="true"/>
            <visualProperty name="NODE_LABEL" default="">
                <passthroughMapping attributeType="string" attributeName="name"/>
            </visualProperty>
            <visualProperty name="NODE_CUSTOMPAINT_4" default="DefaultVisualizableVisualProperty(id=NODE_CUSTOMPAINT_4, name=Node Custom Paint 4)"/>
            <visualProperty name="NODE_CUSTOMGRAPHICS_SIZE_3" default="50.0"/>
            <visualProperty name="NODE_CUSTOMGRAPHICS_POSITION_5" default="C,C,c,0.00,0.00"/>
        </node>
        <edge>
            <dependency name="arrowColorMatchesEdge" value="false"/>
            <visualProperty name="EDGE_SELECTED" default="false"/>
            <visualProperty name="EDGE_SOURCE_ARROW_UNSELECTED_PAINT" default="#000000"/>
            <visualProperty name="EDGE_UNSELECTED_PAINT" default="#404040"/>
            <visualProperty name="EDGE_TOOLTIP" default=""/>
            <visualProperty name="EDGE_SOURCE_ARROW_SELECTED_PAINT" default="#FFFF00"/>
            <visualProperty name="EDGE_LABEL_TRANSPARENCY" default="255"/>
            <visualProperty name="EDGE_LABEL_FONT_FACE" default="Dialog.plain,plain,10"/>
            <visualProperty name="EDGE_TARGET_ARROW_SHAPE" default="NONE"/>
            <visualProperty name="EDGE_LABEL_FONT_SIZE" default="10"/>
            <visualProperty name="EDGE_TARGET_ARROW_SIZE" default="6.0"/>
            <visualProperty name="EDGE_VISIBLE" default="true"/>
            <visualProperty name="EDGE_WIDTH" default="1.0"/>
            <visualProperty name="EDGE_TRANSPARENCY" default="255"/>
            <visualProperty name="EDGE_LABEL_WIDTH" default="200.0"/>
            <visualProperty name="EDGE_LABEL_COLOR" default="#333333"/>
            <visualProperty name="EDGE_STROKE_UNSELECTED_PAINT" default="#999999"/>
            <visualProperty name="EDGE_PAINT" default="#323232"/>
            <visualProperty name="EDGE_CURVED" default="true"/>
            <visualProperty name="EDGE_SOURCE_ARROW_SIZE" default="6.0"/>
            <visualProperty name="EDGE_BEND" default=""/>
            <visualProperty name="EDGE_STROKE_SELECTED_PAINT" default="#FF0000"/>
            <visualProperty name="EDGE_SOURCE_ARROW_SHAPE" default="NONE"/>
            <visualProperty name="EDGE_LABEL" default="">
                <passthroughMapping attributeType="string" attributeName="interaction"/>
            </visualProperty>
            <visualProperty name="EDGE_SELECTED_PAINT" default="#FF0000"/>
            <visualProperty name="EDGE_LINE_TYPE" default="SOLID">
                <discreteMapping attributeType="string" attributeName="interaction">
                    <discreteMappingEntry value="SOLID" attributeValue="pp"/>
                    <discreteMappingEntry value="LONG_DASH" attributeValue="pd"/>
                </discreteMapping>
            </visualProperty>
            <visualProperty name="EDGE_TARGET_ARROW_SELECTED_PAINT" default="#FFFF00"/>
            <visualProperty name="EDGE_TARGET_ARROW_UNSELECTED_PAINT" default="#000000"/>
        </edge>
    </visualStyle>
    <visualStyle name="defdirected">
        <network>
            <visualProperty name="NETWORK_CENTER_X_LOCATION" default="0.0"/>
            <visualProperty name="NETWORK_CENTER_Y_LOCATION" default="0.0"/>
            <visualProperty name="NETWORK_NODE_SELECTION" default="true"/>
            <visualProperty name="NETWORK_DEPTH" default="0.0"/>
            <visualProperty name="NETWORK_BACKGROUND_PAINT" default="#FFFFFF"/>
            <visualProperty name="NETWORK_SCALE_FACTOR" default="1.0"/>
            <visualProperty name="NETWORK_HEIGHT" default="400.0"/>
            <visualProperty name="NETWORK_WIDTH" default="550.0"/>
            <visualProperty name="NETWORK_SIZE" default="550.0"/>
            <visualProperty name="NETWORK_TITLE" default=""/>
            <visualProperty name="NETWORK_EDGE_SELECTION" default="true"/>
            <visualProperty name="NETWORK_CENTER_Z_LOCATION" default="0.0"/>
        </network>
        <node>
            <dependency name="nodeCustomGraphicsSizeSync" value="true"/>
            <dependency name="nodeSizeLocked" value="false"/>
            <visualProperty name="NODE_Y_LOCATION" default="0.0"/>
            <visualProperty name="COMPOUND_NODE_PADDING" default="10.0"/>
            <visualProperty name="NODE_CUSTOMGRAPHICS_5" default="org.cytoscape.ding.customgraphics.NullCustomGraphics,0,[ Remove Graphics ],"/>
            <visualProperty name="COMPOUND_NODE_SHAPE" default="ROUND_RECTANGLE"/>
            <visualProperty name="NODE_CUSTOMPAINT_9" default="DefaultVisualizableVisualProperty(id=NODE_CUSTOMPAINT_9, name=Node Custom Paint 9)"/>
            <visualProperty name="NODE_CUSTOMGRAPHICS_POSITION_3" default="C,C,c,0.00,0.00"/>
            <visualProperty name="NODE_PAINT" default="#1E90FF"/>
            <visualProperty name="NODE_CUSTOMGRAPHICS_SIZE_9" default="50.0"/>
            <visualProperty name="NODE_CUSTOMGRAPHICS_SIZE_1" default="50.0"/>
            <visualProperty name="NODE_BORDER_PAINT" default="#CCCCCC"/>
            <visualProperty name="NODE_CUSTOMGRAPHICS_1" default="org.cytoscape.ding.customgraphics.NullCustomGraphics,0,[ Remove Graphics ],"/>
            <visualProperty name="NODE_CUSTOMGRAPHICS_8" default="org.cytoscape.ding.customgraphics.NullCustomGraphics,0,[ Remove Graphics ],"/>
            <visualProperty name="NODE_TRANSPARENCY" default="255"/>
            <visualProperty name="NODE_CUSTOMGRAPHICS_SIZE_2" default="50.0"/>
            <visualProperty name="NODE_LABEL_POSITION" default="C,C,c,0.00,0.00"/>
            <visualProperty name="NODE_Z_LOCATION" default="0.0"/>
            <visualProperty name="NODE_CUSTOMPAINT_6" default="DefaultVisualizableVisualProperty(id=NODE_CUSTOMPAINT_6, name=Node Custom Paint 6)"/>
            <visualProperty name="NODE_CUSTOMGRAPHICS_POSITION_1" default="C,C,c,0.00,0.00"/>
            <visualProperty name="NODE_DEPTH" default="0.0"/>
            <visualProperty name="NODE_CUSTOMPAINT_2" default="DefaultVisualizableVisualProperty(id=NODE_CUSTOMPAINT_2, name=Node Custom Paint 2)"/>
            <visualProperty name="NODE_CUSTOMGRAPHICS_SIZE_7" default="50.0"/>
            <visualProperty name="NODE_X_LOCATION" default="0.0"/>
            <visualProperty name="NODE_LABEL_FONT_FACE" default="SansSerif.plain,plain,12"/>
            <visualProperty name="NODE_CUSTOMGRAPHICS_9" default="org.cytoscape.ding.customgraphics.NullCustomGraphics,0,[ Remove Graphics ],"/>
            <visualProperty name="NODE_BORDER_TRANSPARENCY" default="255"/>
            <visualProperty name="NODE_CUSTOMGRAPHICS_POSITION_2" default="C,C,c,0.00,0.00"/>
            <visualProperty name="NODE_CUSTOMGRAPHICS_6" default="org.cytoscape.ding.customgraphics.NullCustomGraphics,0,[ Remove Graphics ],"/>
            <visualProperty name="NODE_CUSTOMGRAPHICS_POSITION_6" default="C,C,c,0.00,0.00"/>
            <visualProperty name="NODE_CUSTOMPAINT_7" default="DefaultVisualizableVisualProperty(id=NODE_CUSTOMPAINT_7, name=Node Custom Paint 7)"/>
            <visualProperty name="NODE_LABEL_WIDTH" default="200.0"/>
            <visualProperty name="NODE_SELECTED_PAINT" default="#FFFF00"/>
            <visualProperty name="NODE_FILL_COLOR" default="#89D0F5"/>
            <visualProperty name="NODE_CUSTOMGRAPHICS_2" default="org.cytoscape.ding.customgraphics.NullCustomGraphics,0,[ Remove Graphics ],"/>
            <visualProperty name="NODE_CUSTOMGRAPHICS_POSITION_4" default="C,C,c,0.00,0.00"/>
            <visualProperty name="NODE_TOOLTIP" default=""/>
            <visualProperty name="NODE_LABEL_TRANSPARENCY" default="255"/>
            <visualProperty name="NODE_WIDTH" default="75.0"/>
            <visualProperty name="NODE_CUSTOMGRAPHICS_POSITION_7" default="C,C,c,0.00,0.00"/>
            <visualProperty name="NODE_SHAPE" default="ROUND_RECTANGLE">
                <discreteMapping attributeType="string" attributeName="Node Type">
                    <discreteMappingEntry value="DIAMOND" attributeValue="interaction"/>
                </discreteMapping>
            </visualProperty>
            <visualProperty name="NODE_CUSTOMPAINT_5" default="DefaultVisualizableVisualProperty(id=NODE_CUSTOMPAINT_5, name=Node Custom Paint 5)"/>
            <visualProperty name="NODE_CUSTOMGRAPHICS_POSITION_9" default="C,C,c,0.00,0.00"/>
            <visualProperty name="NODE_CUSTOMGRAPHICS_4" default="org.cytoscape.ding.customgraphics.NullCustomGraphics,0,[ Remove Graphics ],"/>
            <visualProperty name="NODE_CUSTOMGRAPHICS_7" default="org.cytoscape.ding.customgraphics.NullCustomGraphics,0,[ Remove Graphics ],"/>
            <visualProperty name="NODE_CUSTOMGRAPHICS_3" default="org.cytoscape.ding.customgraphics.NullCustomGraphics,0,[ Remove Graphics ],"/>
            <visualProperty name="NODE_CUSTOMPAINT_3" default="DefaultVisualizableVisualProperty(id=NODE_CUSTOMPAINT_3, name=Node Custom Paint 3)"/>
            <visualProperty name="NODE_HEIGHT" default="35.0"/>
            <visualProperty name="NODE_SIZE" default="35.0"/>
            <visualProperty name="NODE_CUSTOMPAINT_1" default="DefaultVisualizableVisualProperty(id=NODE_CUSTOMPAINT_1, name=Node Custom Paint 1)"/>
            <visualProperty name="NODE_CUSTOMPAINT_8" default="DefaultVisualizableVisualProperty(id=NODE_CUSTOMPAINT_8, name=Node Custom Paint 8)"/>
            <visualProperty name="NODE_CUSTOMGRAPHICS_POSITION_8" default="C,C,c,0.00,0.00"/>
            <visualProperty name="NODE_SELECTED" default="false"/>
            <visualProperty name="NODE_CUSTOMGRAPHICS_SIZE_8" default="50.0"/>
            <visualProperty name="NODE_LABEL_COLOR" default="#000000"/>
            <visualProperty name="NODE_BORDER_STROKE" default="SOLID"/>
            <visualProperty name="NODE_CUSTOMGRAPHICS_SIZE_5" default="50.0"/>
            <visualProperty name="NODE_CUSTOMGRAPHICS_SIZE_4" default="50.0"/>
            <visualProperty name="NODE_VISIBLE" default="true"/>
            <visualProperty name="NODE_BORDER_WIDTH" default="0.0"/>
            <visualProperty name="NODE_LABEL_FONT_SIZE" default="12"/>
            <visualProperty name="NODE_CUSTOMGRAPHICS_SIZE_6" default="50.0"/>
            <visualProperty name="NODE_NESTED_NETWORK_IMAGE_VISIBLE" default="true"/>
            <visualProperty name="NODE_LABEL" default="">
                <passthroughMapping attributeType="string" attributeName="name"/>
            </visualProperty>
            <visualProperty name="NODE_CUSTOMPAINT_4" default="DefaultVisualizableVisualProperty(id=NODE_CUSTOMPAINT_4, name=Node Custom Paint 4)"/>
            <visualProperty name="NODE_CUSTOMGRAPHICS_SIZE_3" default="50.0"/>
            <visualProperty name="NODE_CUSTOMGRAPHICS_POSITION_5" default="C,C,c,0.00,0.00"/>
        </node>
        <edge>
            <dependency name="arrowColorMatchesEdge" value="false"/>
            <visualProperty name="EDGE_SELECTED" default="false"/>
            <visualProperty name="EDGE_SOURCE_ARROW_UNSELECTED_PAINT" default="#000000"/>
            <visualProperty name="EDGE_UNSELECTED_PAINT" default="#404040"/>
            <visualProperty name="EDGE_TOOLTIP" default=""/>
            <visualProperty name="EDGE_SOURCE_ARROW_SELECTED_PAINT" default="#FFFF00"/>
            <visualProperty name="EDGE_LABEL_TRANSPARENCY" default="255"/>
            <visualProperty name="EDGE_LABEL_FONT_FACE" default="Dialog.plain,plain,10"/>
            <visualProperty name="EDGE_TARGET_ARROW_SHAPE" default="NONE"/>
            <visualProperty name="EDGE_LABEL_FONT_SIZE" default="10"/>
            <visualProperty name="EDGE_TARGET_ARROW_SIZE" default="6.0"/>
            <visualProperty name="EDGE_VISIBLE" default="true"/>
            <visualProperty name="EDGE_WIDTH" default="2.0"/>
            <visualProperty name="EDGE_TRANSPARENCY" default="255"/>
            <visualProperty name="EDGE_LABEL_WIDTH" default="200.0"/>
            <visualProperty name="EDGE_LABEL_COLOR" default="#000000"/>
            <visualProperty name="EDGE_STROKE_UNSELECTED_PAINT" default="#848484"/>
            <visualProperty name="EDGE_PAINT" default="#323232"/>
            <visualProperty name="EDGE_CURVED" default="true"/>
            <visualProperty name="EDGE_SOURCE_ARROW_SIZE" default="6.0"/>
            <visualProperty name="EDGE_BEND" default=""/>
            <visualProperty name="EDGE_STROKE_SELECTED_PAINT" default="#FF0000"/>
            <visualProperty name="EDGE_SOURCE_ARROW_SHAPE" default="NONE"/>
            <visualProperty name="EDGE_LABEL" default=""/>
            <visualProperty name="EDGE_SELECTED_PAINT" default="#FF0000"/>
            <visualProperty name="EDGE_LINE_TYPE" default="SOLID"/>
            <visualProperty name="EDGE_TARGET_ARROW_SELECTED_PAINT" default="#FFFF00"/>
            <visualProperty name="EDGE_TARGET_ARROW_UNSELECTED_PAINT" default="#000000"/>
        </edge>
    </visualStyle>
    <visualStyle name="iRegulon Visual Style">
        <network>
            <visualProperty name="NETWORK_CENTER_X_LOCATION" default="0.0"/>
            <visualProperty name="NETWORK_CENTER_Y_LOCATION" default="0.0"/>
            <visualProperty name="NETWORK_NODE_SELECTION" default="true"/>
            <visualProperty name="NETWORK_DEPTH" default="0.0"/>
            <visualProperty name="NETWORK_BACKGROUND_PAINT" default="#CED7D7"/>
            <visualProperty name="NETWORK_SCALE_FACTOR" default="1.0"/>
            <visualProperty name="NETWORK_HEIGHT" default="400.0"/>
            <visualProperty name="NETWORK_WIDTH" default="550.0"/>
            <visualProperty name="NETWORK_TITLE" default=""/>
            <visualProperty name="NETWORK_EDGE_SELECTION" default="true"/>
            <visualProperty name="NETWORK_CENTER_Z_LOCATION" default="0.0"/>
        </network>
        <node>
            <dependency name="nodeCustomGraphicsSizeSync" value="true"/>
            <dependency name="nodeSizeLocked" value="false"/>
            <visualProperty name="NODE_Y_LOCATION" default="0.0"/>
            <visualProperty name="COMPOUND_NODE_PADDING" default="10.0"/>
            <visualProperty name="NODE_CUSTOMGRAPHICS_5" default="org.cytoscape.ding.customgraphics.NullCustomGraphics,0,[ Remove Graphics ],"/>
            <visualProperty name="COMPOUND_NODE_SHAPE" default="ROUND_RECTANGLE"/>
            <visualProperty name="NODE_CUSTOMGRAPHICS_POSITION_3" default="C,C,c,0.00,0.00"/>
            <visualProperty name="NODE_CUSTOMGRAPHICS_SIZE_9" default="0.0"/>
            <visualProperty name="NODE_CUSTOMGRAPHICS_SIZE_1" default="0.0"/>
            <visualProperty name="NODE_BORDER_PAINT" default="#0099CC">
                <discreteMapping attributeType="string" attributeName="Regulatory function">
                    <discreteMappingEntry value="#993399" attributeValue="Regulated"/>
                    <discreteMappingEntry value="#009900" attributeValue="Regulator"/>
                </discreteMapping>
            </visualProperty>
            <visualProperty name="NODE_CUSTOMGRAPHICS_1" default="org.cytoscape.ding.customgraphics.NullCustomGraphics,0,[ Remove Graphics ],"/>
            <visualProperty name="NODE_CUSTOMGRAPHICS_8" default="org.cytoscape.ding.customgraphics.NullCustomGraphics,0,[ Remove Graphics ],"/>
            <visualProperty name="NODE_TRANSPARENCY" default="200"/>
            <visualProperty name="NODE_CUSTOMGRAPHICS_SIZE_2" default="0.0"/>
            <visualProperty name="NODE_LABEL_POSITION" default="C,C,c,0.00,0.00"/>
            <visualProperty name="NODE_Z_LOCATION" default="0.0"/>
            <visualProperty name="NODE_CUSTOMGRAPHICS_POSITION_1" default="C,C,c,0.00,0.00"/>
            <visualProperty name="NODE_DEPTH" default="0.0"/>
            <visualProperty name="NODE_CUSTOMGRAPHICS_SIZE_7" default="0.0"/>
            <visualProperty name="NODE_X_LOCATION" default="0.0"/>
            <visualProperty name="NODE_LABEL_FONT_FACE" default="SansSerif.plain,plain,12"/>
            <visualProperty name="NODE_CUSTOMGRAPHICS_9" default="org.cytoscape.ding.customgraphics.NullCustomGraphics,0,[ Remove Graphics ],"/>
            <visualProperty name="NODE_BORDER_TRANSPARENCY" default="200"/>
            <visualProperty name="NODE_CUSTOMGRAPHICS_POSITION_2" default="C,C,c,0.00,0.00"/>
            <visualProperty name="NODE_CUSTOMGRAPHICS_6" default="org.cytoscape.ding.customgraphics.NullCustomGraphics,0,[ Remove Graphics ],"/>
            <visualProperty name="NODE_CUSTOMGRAPHICS_POSITION_6" default="C,C,c,0.00,0.00"/>
            <visualProperty name="NODE_LABEL_WIDTH" default="200.0"/>
            <visualProperty name="NODE_SELECTED_PAINT" default="#FFFF00"/>
            <visualProperty name="NODE_FILL_COLOR" default="#99FFFF">
                <discreteMapping attributeType="string" attributeName="Regulatory function">
                    <discreteMappingEntry value="#FF33FF" attributeValue="Regulated"/>
                    <discreteMappingEntry value="#00FF00" attributeValue="Regulator"/>
                </discreteMapping>
            </visualProperty>
            <visualProperty name="NODE_CUSTOMGRAPHICS_2" default="org.cytoscape.ding.customgraphics.NullCustomGraphics,0,[ Remove Graphics ],"/>
            <visualProperty name="NODE_CUSTOMGRAPHICS_POSITION_4" default="C,C,c,0.00,0.00"/>
            <visualProperty name="NODE_TOOLTIP" default=""/>
            <visualProperty name="NODE_LABEL_TRANSPARENCY" default="255"/>
            <visualProperty name="NODE_WIDTH" default="80.0"/>
            <visualProperty name="NODE_CUSTOMGRAPHICS_POSITION_7" default="C,C,c,0.00,0.00"/>
            <visualProperty name="NODE_SHAPE" default="ELLIPSE">
                <discreteMapping attributeType="string" attributeName="Regulatory function">
                    <discreteMappingEntry value="ELLIPSE" attributeValue="Regulated"/>
                    <discreteMappingEntry value="OCTAGON" attributeValue="Regulator"/>
                </discreteMapping>
            </visualProperty>
            <visualProperty name="NODE_CUSTOMGRAPHICS_POSITION_9" default="C,C,c,0.00,0.00"/>
            <visualProperty name="NODE_CUSTOMGRAPHICS_4" default="org.cytoscape.ding.customgraphics.NullCustomGraphics,0,[ Remove Graphics ],"/>
            <visualProperty name="NODE_CUSTOMGRAPHICS_7" default="org.cytoscape.ding.customgraphics.NullCustomGraphics,0,[ Remove Graphics ],"/>
            <visualProperty name="NODE_CUSTOMGRAPHICS_3" default="org.cytoscape.ding.customgraphics.NullCustomGraphics,0,[ Remove Graphics ],"/>
            <visualProperty name="NODE_HEIGHT" default="40.0"/>
            <visualProperty name="NODE_CUSTOMGRAPHICS_POSITION_8" default="C,C,c,0.00,0.00"/>
            <visualProperty name="NODE_SELECTED" default="false"/>
            <visualProperty name="NODE_CUSTOMGRAPHICS_SIZE_8" default="0.0"/>
            <visualProperty name="NODE_LABEL_COLOR" default="#0066CC">
                <discreteMapping attributeType="string" attributeName="Regulatory function">
                    <discreteMappingEntry value="#000000" attributeValue="Regulated"/>
                    <discreteMappingEntry value="#000000" attributeValue="Regulator"/>
                </discreteMapping>
            </visualProperty>
            <visualProperty name="NODE_BORDER_STROKE" default="SOLID"/>
            <visualProperty name="NODE_CUSTOMGRAPHICS_SIZE_5" default="0.0"/>
            <visualProperty name="NODE_CUSTOMGRAPHICS_SIZE_4" default="0.0"/>
            <visualProperty name="NODE_VISIBLE" default="true"/>
            <visualProperty name="NODE_BORDER_WIDTH" default="6.0"/>
            <visualProperty name="NODE_LABEL_FONT_SIZE" default="15"/>
            <visualProperty name="NODE_CUSTOMGRAPHICS_SIZE_6" default="0.0"/>
            <visualProperty name="NODE_NESTED_NETWORK_IMAGE_VISIBLE" default="true"/>
            <visualProperty name="NODE_LABEL" default="">
                <passthroughMapping attributeType="string" attributeName="name"/>
            </visualProperty>
            <visualProperty name="NODE_CUSTOMGRAPHICS_SIZE_3" default="0.0"/>
            <visualProperty name="NODE_CUSTOMGRAPHICS_POSITION_5" default="C,C,c,0.00,0.00"/>
        </node>
        <edge>
            <dependency name="arrowColorMatchesEdge" value="false"/>
            <visualProperty name="EDGE_SELECTED" default="false"/>
            <visualProperty name="EDGE_SOURCE_ARROW_UNSELECTED_PAINT" default="#000000"/>
            <visualProperty name="EDGE_TOOLTIP" default=""/>
            <visualProperty name="EDGE_SOURCE_ARROW_SELECTED_PAINT" default="#FFFF00"/>
            <visualProperty name="EDGE_LABEL_TRANSPARENCY" default="255"/>
            <visualProperty name="EDGE_LABEL_FONT_FACE" default="SansSerif.plain,plain,10"/>
            <visualProperty name="EDGE_TARGET_ARROW_SHAPE" default="NONE">
                <discreteMapping attributeType="string" attributeName="Regulatory function">
                    <discreteMappingEntry value="ARROW" attributeValue="Predicted"/>
                    <discreteMappingEntry value="ARROW" attributeValue="Metatargetome"/>
                </discreteMapping>
            </visualProperty>
            <visualProperty name="EDGE_LABEL_FONT_SIZE" default="10"/>
            <visualProperty name="EDGE_TARGET_ARROW_SIZE" default="6.0"/>
            <visualProperty name="EDGE_VISIBLE" default="true"/>
            <visualProperty name="EDGE_WIDTH" default="3.0"/>
            <visualProperty name="EDGE_TRANSPARENCY" default="255"/>
            <visualProperty name="EDGE_LABEL_WIDTH" default="200.0"/>
            <visualProperty name="EDGE_LABEL_COLOR" default="#000000"/>
            <visualProperty name="EDGE_STROKE_UNSELECTED_PAINT" default="#404040">
                <discreteMapping attributeType="integer" attributeName="Cluster Color">
                    <discreteMappingEntry value="#337F37" attributeValue="3374903"/>
                    <discreteMappingEntry value="#55CC51" attributeValue="5622865"/>
                    <discreteMappingEntry value="#7F337A" attributeValue="8336250"/>
                    <discreteMappingEntry value="#CC51C4" attributeValue="13390276"/>
                    <discreteMappingEntry value="#5BCC51" attributeValue="6016081"/>
                    <discreteMappingEntry value="#3C7F33" attributeValue="3964723"/>
                    <discreteMappingEntry value="#CC515D" attributeValue="13390173"/>
                    <discreteMappingEntry value="#7F336C" attributeValue="8336236"/>
                    <discreteMappingEntry value="#C2CC51" attributeValue="12766289"/>
                    <discreteMappingEntry value="#CC9651" attributeValue="13407825"/>
                    <discreteMappingEntry value="#51CCCC" attributeValue="5360844"/>
                    <discreteMappingEntry value="#51A3CC" attributeValue="5350348"/>
                    <discreteMappingEntry value="#519ECC" attributeValue="5349068"/>
                    <discreteMappingEntry value="#5187CC" attributeValue="5343180"/>
                    <discreteMappingEntry value="#517BCC" attributeValue="5340108"/>
                    <discreteMappingEntry value="#5170CC" attributeValue="5337292"/>
                    <discreteMappingEntry value="#5159CC" attributeValue="5331404"/>
                    <discreteMappingEntry value="#51B5CC" attributeValue="5354956"/>
                    <discreteMappingEntry value="#51C6CC" attributeValue="5359308"/>
                    <discreteMappingEntry value="#51C0CC" attributeValue="5357772"/>
                    <discreteMappingEntry value="#CC7451" attributeValue="13399121"/>
                    <discreteMappingEntry value="#CC5D51" attributeValue="13393233"/>
                    <discreteMappingEntry value="#CC5151" attributeValue="13390161"/>
                    <discreteMappingEntry value="#CC6851" attributeValue="13396049"/>
                    <discreteMappingEntry value="#CC6E51" attributeValue="13397585"/>
                    <discreteMappingEntry value="#CCAD51" attributeValue="13413713"/>
                    <discreteMappingEntry value="#CCB351" attributeValue="13415249"/>
                    <discreteMappingEntry value="#CCC451" attributeValue="13419601"/>
                    <discreteMappingEntry value="#CCB851" attributeValue="13416529"/>
                    <discreteMappingEntry value="#CC8A51" attributeValue="13404753"/>
                    <discreteMappingEntry value="#CC9051" attributeValue="13406289"/>
                    <discreteMappingEntry value="#CC7F51" attributeValue="13401937"/>
                    <discreteMappingEntry value="#6C51CC" attributeValue="7098828"/>
                    <discreteMappingEntry value="#51CC70" attributeValue="5360752"/>
                    <discreteMappingEntry value="#7F335E" attributeValue="8336222"/>
                    <discreteMappingEntry value="#CC5168" attributeValue="13390184"/>
                    <discreteMappingEntry value="#77CC51" attributeValue="7851089"/>
                    <discreteMappingEntry value="#6051CC" attributeValue="6312396"/>
                    <discreteMappingEntry value="#7DCC51" attributeValue="8244305"/>
                    <discreteMappingEntry value="#60CC51" attributeValue="6343761"/>
                    <discreteMappingEntry value="#CC517F" attributeValue="13390207"/>
                    <discreteMappingEntry value="#7751CC" attributeValue="7819724"/>
                    <discreteMappingEntry value="#7F3341" attributeValue="8336193"/>
                    <discreteMappingEntry value="#8E51CC" attributeValue="9327052"/>
                    <discreteMappingEntry value="#337F71" attributeValue="3374961"/>
                    <discreteMappingEntry value="#51CC92" attributeValue="5360786"/>
                    <discreteMappingEntry value="#757F33" attributeValue="7700275"/>
                    <discreteMappingEntry value="#9ACC51" attributeValue="10144849"/>
                    <discreteMappingEntry value="#7F4F33" attributeValue="8343347"/>
                    <discreteMappingEntry value="#337F7F" attributeValue="3374975"/>
                    <discreteMappingEntry value="#7F6C33" attributeValue="8350771"/>
                    <discreteMappingEntry value="#33627F" attributeValue="3367551"/>
                    <discreteMappingEntry value="#7F5E33" attributeValue="8347187"/>
                    <discreteMappingEntry value="#7F7A33" attributeValue="8354355"/>
                    <discreteMappingEntry value="#33717F" attributeValue="3371391"/>
                    <discreteMappingEntry value="#33547F" attributeValue="3363967"/>
                    <discreteMappingEntry value="#7F3A33" attributeValue="8337971"/>
                    <discreteMappingEntry value="#7F4833" attributeValue="8341555"/>
                    <discreteMappingEntry value="#51CC9E" attributeValue="5360798"/>
                    <discreteMappingEntry value="#337F62" attributeValue="3374946"/>
                    <discreteMappingEntry value="#677F33" attributeValue="6782771"/>
                    <discreteMappingEntry value="#51CC87" attributeValue="5360775"/>
                    <discreteMappingEntry value="#CC5196" attributeValue="13390230"/>
                    <discreteMappingEntry value="#51CC8C" attributeValue="5360780"/>
                    <discreteMappingEntry value="#8ECC51" attributeValue="9358417"/>
                    <discreteMappingEntry value="#CC51AD" attributeValue="13390253"/>
                    <discreteMappingEntry value="#51CCB5" attributeValue="5360821"/>
                    <discreteMappingEntry value="#337F54" attributeValue="3374932"/>
                    <discreteMappingEntry value="#A551CC" attributeValue="10834380"/>
                    <discreteMappingEntry value="#597F33" attributeValue="5865267"/>
                    <discreteMappingEntry value="#BCCC51" attributeValue="12373073"/>
                    <discreteMappingEntry value="#CC51A1" attributeValue="13390241"/>
                    <discreteMappingEntry value="#BC51CC" attributeValue="12341708"/>
                    <discreteMappingEntry value="#A0CC51" attributeValue="10538065"/>
                    <discreteMappingEntry value="#A5CC51" attributeValue="10865745"/>
                    <discreteMappingEntry value="#337F46" attributeValue="3374918"/>
                    <discreteMappingEntry value="#4A7F33" attributeValue="4882227"/>
                    <discreteMappingEntry value="#B151CC" attributeValue="11620812"/>
                </discreteMapping>
            </visualProperty>
            <visualProperty name="EDGE_CURVED" default="true"/>
            <visualProperty name="EDGE_SOURCE_ARROW_SIZE" default="6.0"/>
            <visualProperty name="EDGE_STROKE_SELECTED_PAINT" default="#FF0000"/>
            <visualProperty name="EDGE_SOURCE_ARROW_SHAPE" default="NONE"/>
            <visualProperty name="EDGE_LABEL" default=""/>
            <visualProperty name="EDGE_LINE_TYPE" default="SOLID"/>
            <visualProperty name="EDGE_TARGET_ARROW_SELECTED_PAINT" default="#FFFF00"/>
            <visualProperty name="EDGE_TARGET_ARROW_UNSELECTED_PAINT" default="#000000"/>
        </edge>
    </visualStyle>
    <visualStyle name="size_rank_4">
        <network>
            <visualProperty name="NETWORK_CENTER_X_LOCATION" default="0.0"/>
            <visualProperty name="NETWORK_CENTER_Y_LOCATION" default="0.0"/>
            <visualProperty name="NETWORK_NODE_SELECTION" default="true"/>
            <visualProperty name="NETWORK_DEPTH" default="0.0"/>
            <visualProperty name="NETWORK_BACKGROUND_PAINT" default="#EBEBEB"/>
            <visualProperty name="NETWORK_SCALE_FACTOR" default="1.0"/>
            <visualProperty name="NETWORK_HEIGHT" default="400.0"/>
            <visualProperty name="NETWORK_WIDTH" default="550.0"/>
            <visualProperty name="NETWORK_SIZE" default="550.0"/>
            <visualProperty name="NETWORK_TITLE" default=""/>
            <visualProperty name="NETWORK_EDGE_SELECTION" default="true"/>
            <visualProperty name="NETWORK_CENTER_Z_LOCATION" default="0.0"/>
        </network>
        <node>
            <dependency name="nodeCustomGraphicsSizeSync" value="true"/>
            <dependency name="nodeSizeLocked" value="true"/>
            <visualProperty name="NODE_Y_LOCATION" default="0.0"/>
            <visualProperty name="COMPOUND_NODE_PADDING" default="10.0"/>
            <visualProperty name="NODE_CUSTOMGRAPHICS_5" default="org.cytoscape.ding.customgraphics.NullCustomGraphics,0,[ Remove Graphics ],"/>
            <visualProperty name="COMPOUND_NODE_SHAPE" default="ROUND_RECTANGLE"/>
            <visualProperty name="NODE_CUSTOMPAINT_9" default="DefaultVisualizableVisualProperty(id=NODE_CUSTOMPAINT_9, name=Node Custom Paint 9)"/>
            <visualProperty name="NODE_CUSTOMGRAPHICS_POSITION_3" default="C,C,c,0.00,0.00"/>
            <visualProperty name="NODE_PAINT" default="#787878"/>
            <visualProperty name="NODE_CUSTOMGRAPHICS_SIZE_9" default="50.0"/>
            <visualProperty name="NODE_CUSTOMGRAPHICS_SIZE_1" default="50.0"/>
            <visualProperty name="NODE_BORDER_PAINT" default="#000000"/>
            <visualProperty name="NODE_CUSTOMGRAPHICS_1" default="org.cytoscape.ding.customgraphics.NullCustomGraphics,0,[ Remove Graphics ],"/>
            <visualProperty name="NODE_CUSTOMGRAPHICS_8" default="org.cytoscape.ding.customgraphics.NullCustomGraphics,0,[ Remove Graphics ],"/>
            <visualProperty name="NODE_TRANSPARENCY" default="255"/>
            <visualProperty name="NODE_CUSTOMGRAPHICS_SIZE_2" default="50.0"/>
            <visualProperty name="NODE_LABEL_POSITION" default="C,C,c,0.00,0.00"/>
            <visualProperty name="NODE_Z_LOCATION" default="0.0"/>
            <visualProperty name="NODE_CUSTOMPAINT_6" default="DefaultVisualizableVisualProperty(id=NODE_CUSTOMPAINT_6, name=Node Custom Paint 6)"/>
            <visualProperty name="NODE_CUSTOMGRAPHICS_POSITION_1" default="C,C,c,0.00,0.00"/>
            <visualProperty name="NODE_DEPTH" default="0.0"/>
            <visualProperty name="NODE_CUSTOMPAINT_2" default="DefaultVisualizableVisualProperty(id=NODE_CUSTOMPAINT_2, name=Node Custom Paint 2)"/>
            <visualProperty name="NODE_CUSTOMGRAPHICS_SIZE_7" default="50.0"/>
            <visualProperty name="NODE_X_LOCATION" default="0.0"/>
            <visualProperty name="NODE_LABEL_FONT_FACE" default="SansSerif.plain,plain,12"/>
            <visualProperty name="NODE_CUSTOMGRAPHICS_9" default="org.cytoscape.ding.customgraphics.NullCustomGraphics,0,[ Remove Graphics ],"/>
            <visualProperty name="NODE_BORDER_TRANSPARENCY" default="255"/>
            <visualProperty name="NODE_CUSTOMGRAPHICS_POSITION_2" default="C,C,c,0.00,0.00"/>
            <visualProperty name="NODE_CUSTOMGRAPHICS_6" default="org.cytoscape.ding.customgraphics.NullCustomGraphics,0,[ Remove Graphics ],"/>
            <visualProperty name="NODE_CUSTOMGRAPHICS_POSITION_6" default="C,C,c,0.00,0.00"/>
            <visualProperty name="NODE_CUSTOMPAINT_7" default="DefaultVisualizableVisualProperty(id=NODE_CUSTOMPAINT_7, name=Node Custom Paint 7)"/>
            <visualProperty name="NODE_LABEL_WIDTH" default="200.0"/>
            <visualProperty name="NODE_SELECTED_PAINT" default="#FFFF00"/>
            <visualProperty name="NODE_FILL_COLOR" default="#CCCCFF"/>
            <visualProperty name="NODE_CUSTOMGRAPHICS_2" default="org.cytoscape.ding.customgraphics.NullCustomGraphics,0,[ Remove Graphics ],"/>
            <visualProperty name="NODE_CUSTOMGRAPHICS_POSITION_4" default="C,C,c,0.00,0.00"/>
            <visualProperty name="NODE_TOOLTIP" default=""/>
            <visualProperty name="NODE_LABEL_TRANSPARENCY" default="255"/>
            <visualProperty name="NODE_WIDTH" default="50.0"/>
            <visualProperty name="NODE_CUSTOMGRAPHICS_POSITION_7" default="C,C,c,0.00,0.00"/>
            <visualProperty name="NODE_SHAPE" default="RECTANGLE"/>
            <visualProperty name="NODE_CUSTOMPAINT_5" default="DefaultVisualizableVisualProperty(id=NODE_CUSTOMPAINT_5, name=Node Custom Paint 5)"/>
            <visualProperty name="NODE_CUSTOMGRAPHICS_POSITION_9" default="C,C,c,0.00,0.00"/>
            <visualProperty name="NODE_CUSTOMGRAPHICS_4" default="org.cytoscape.ding.customgraphics.NullCustomGraphics,0,[ Remove Graphics ],"/>
            <visualProperty name="NODE_CUSTOMGRAPHICS_7" default="org.cytoscape.ding.customgraphics.NullCustomGraphics,0,[ Remove Graphics ],"/>
            <visualProperty name="NODE_CUSTOMGRAPHICS_3" default="org.cytoscape.ding.customgraphics.NullCustomGraphics,0,[ Remove Graphics ],"/>
            <visualProperty name="NODE_CUSTOMPAINT_3" default="DefaultVisualizableVisualProperty(id=NODE_CUSTOMPAINT_3, name=Node Custom Paint 3)"/>
            <visualProperty name="NODE_HEIGHT" default="50.0"/>
            <visualProperty name="NODE_SIZE" default="12.0">
                <continuousMapping attributeType="float" attributeName="diffusion_output__rank">
                    <continuousMappingPoint lesserValue="1.0" greaterValue="39.11245096536507" equalValue="39.11245096536507" attrValue="0.0"/>
                    <continuousMappingPoint lesserValue="13.821692732043733" greaterValue="1.0" equalValue="13.821692732043733" attrValue="99.0"/>
                </continuousMapping>
            </visualProperty>
            <visualProperty name="NODE_CUSTOMPAINT_1" default="DefaultVisualizableVisualProperty(id=NODE_CUSTOMPAINT_1, name=Node Custom Paint 1)"/>
            <visualProperty name="NODE_CUSTOMPAINT_8" default="DefaultVisualizableVisualProperty(id=NODE_CUSTOMPAINT_8, name=Node Custom Paint 8)"/>
            <visualProperty name="NODE_CUSTOMGRAPHICS_POSITION_8" default="C,C,c,0.00,0.00"/>
            <visualProperty name="NODE_SELECTED" default="false"/>
            <visualProperty name="NODE_CUSTOMGRAPHICS_SIZE_8" default="50.0"/>
            <visualProperty name="NODE_LABEL_COLOR" default="#333333"/>
            <visualProperty name="NODE_BORDER_STROKE" default="SOLID"/>
            <visualProperty name="NODE_CUSTOMGRAPHICS_SIZE_5" default="50.0"/>
            <visualProperty name="NODE_CUSTOMGRAPHICS_SIZE_4" default="50.0"/>
            <visualProperty name="NODE_VISIBLE" default="true"/>
            <visualProperty name="NODE_BORDER_WIDTH" default="0.0"/>
            <visualProperty name="NODE_LABEL_FONT_SIZE" default="9"/>
            <visualProperty name="NODE_CUSTOMGRAPHICS_SIZE_6" default="50.0"/>
            <visualProperty name="NODE_NESTED_NETWORK_IMAGE_VISIBLE" default="true"/>
            <visualProperty name="NODE_LABEL" default="">
                <passthroughMapping attributeType="string" attributeName="name"/>
            </visualProperty>
            <visualProperty name="NODE_CUSTOMPAINT_4" default="DefaultVisualizableVisualProperty(id=NODE_CUSTOMPAINT_4, name=Node Custom Paint 4)"/>
            <visualProperty name="NODE_CUSTOMGRAPHICS_SIZE_3" default="50.0"/>
            <visualProperty name="NODE_CUSTOMGRAPHICS_POSITION_5" default="C,C,c,0.00,0.00"/>
        </node>
        <edge>
            <dependency name="arrowColorMatchesEdge" value="false"/>
            <visualProperty name="EDGE_SELECTED" default="false"/>
            <visualProperty name="EDGE_SOURCE_ARROW_UNSELECTED_PAINT" default="#000000"/>
            <visualProperty name="EDGE_UNSELECTED_PAINT" default="#404040"/>
            <visualProperty name="EDGE_TOOLTIP" default=""/>
            <visualProperty name="EDGE_SOURCE_ARROW_SELECTED_PAINT" default="#FFFF00"/>
            <visualProperty name="EDGE_LABEL_TRANSPARENCY" default="255"/>
            <visualProperty name="EDGE_LABEL_FONT_FACE" default="SansSerif.plain,plain,10"/>
            <visualProperty name="EDGE_TARGET_ARROW_SHAPE" default="NONE"/>
            <visualProperty name="EDGE_LABEL_FONT_SIZE" default="10"/>
            <visualProperty name="EDGE_VISIBLE" default="true"/>
            <visualProperty name="EDGE_WIDTH" default="2.0"/>
            <visualProperty name="EDGE_TRANSPARENCY" default="255"/>
            <visualProperty name="EDGE_LABEL_WIDTH" default="200.0"/>
            <visualProperty name="EDGE_LABEL_COLOR" default="#000000"/>
            <visualProperty name="EDGE_STROKE_UNSELECTED_PAINT" default="#4C4C4C"/>
            <visualProperty name="EDGE_PAINT" default="#808080"/>
            <visualProperty name="EDGE_CURVED" default="true"/>
            <visualProperty name="EDGE_BEND" default=""/>
            <visualProperty name="EDGE_STROKE_SELECTED_PAINT" default="#FF0000"/>
            <visualProperty name="EDGE_SOURCE_ARROW_SHAPE" default="NONE"/>
            <visualProperty name="EDGE_LABEL" default=""/>
            <visualProperty name="EDGE_SELECTED_PAINT" default="#FF0000"/>
            <visualProperty name="EDGE_LINE_TYPE" default="SOLID"/>
            <visualProperty name="EDGE_TARGET_ARROW_SELECTED_PAINT" default="#FFFF00"/>
            <visualProperty name="EDGE_TARGET_ARROW_UNSELECTED_PAINT" default="#000000"/>
        </edge>
    </visualStyle>
    <visualStyle name="ModuLand">
        <network>
            <visualProperty name="NETWORK_CENTER_X_LOCATION" default="0.0"/>
            <visualProperty name="NETWORK_CENTER_Y_LOCATION" default="0.0"/>
            <visualProperty name="NETWORK_NODE_SELECTION" default="true"/>
            <visualProperty name="NETWORK_DEPTH" default="0.0"/>
            <visualProperty name="NETWORK_BACKGROUND_PAINT" default="#FFFFFF"/>
            <visualProperty name="NETWORK_SCALE_FACTOR" default="1.0"/>
            <visualProperty name="NETWORK_HEIGHT" default="400.0"/>
            <visualProperty name="NETWORK_WIDTH" default="550.0"/>
            <visualProperty name="NETWORK_TITLE" default=""/>
            <visualProperty name="NETWORK_EDGE_SELECTION" default="true"/>
            <visualProperty name="NETWORK_CENTER_Z_LOCATION" default="0.0"/>
        </network>
        <node>
            <dependency name="nodeCustomGraphicsSizeSync" value="true"/>
            <dependency name="nodeSizeLocked" value="true"/>
            <visualProperty name="NODE_Y_LOCATION" default="0.0"/>
            <visualProperty name="COMPOUND_NODE_PADDING" default="10.0"/>
            <visualProperty name="NODE_CUSTOMGRAPHICS_5" default="org.cytoscape.ding.customgraphics.NullCustomGraphics,0,[ Remove Graphics ],"/>
            <visualProperty name="COMPOUND_NODE_SHAPE" default="ROUND_RECTANGLE"/>
            <visualProperty name="NODE_CUSTOMGRAPHICS_POSITION_3" default="C,C,c,0.00,0.00"/>
            <visualProperty name="NODE_CUSTOMGRAPHICS_SIZE_9" default="0.0"/>
            <visualProperty name="NODE_CUSTOMGRAPHICS_SIZE_1" default="0.0"/>
            <visualProperty name="NODE_BORDER_PAINT" default="#000000"/>
            <visualProperty name="NODE_CUSTOMGRAPHICS_1" default="org.cytoscape.ding.customgraphics.NullCustomGraphics,0,[ Remove Graphics ],"/>
            <visualProperty name="NODE_CUSTOMGRAPHICS_8" default="org.cytoscape.ding.customgraphics.NullCustomGraphics,0,[ Remove Graphics ],"/>
            <visualProperty name="NODE_TRANSPARENCY" default="255"/>
            <visualProperty name="NODE_CUSTOMGRAPHICS_SIZE_2" default="0.0"/>
            <visualProperty name="NODE_LABEL_POSITION" default="C,C,c,0.00,0.00"/>
            <visualProperty name="NODE_Z_LOCATION" default="0.0"/>
            <visualProperty name="NODE_CUSTOMGRAPHICS_POSITION_1" default="C,C,c,0.00,0.00"/>
            <visualProperty name="NODE_DEPTH" default="0.0"/>
            <visualProperty name="NODE_CUSTOMGRAPHICS_SIZE_7" default="0.0"/>
            <visualProperty name="NODE_X_LOCATION" default="0.0"/>
            <visualProperty name="NODE_LABEL_FONT_FACE" default="SansSerif.plain,plain,12"/>
            <visualProperty name="NODE_CUSTOMGRAPHICS_9" default="org.cytoscape.ding.customgraphics.NullCustomGraphics,0,[ Remove Graphics ],"/>
            <visualProperty name="NODE_BORDER_TRANSPARENCY" default="255"/>
            <visualProperty name="NODE_CUSTOMGRAPHICS_POSITION_2" default="C,C,c,0.00,0.00"/>
            <visualProperty name="NODE_CUSTOMGRAPHICS_6" default="org.cytoscape.ding.customgraphics.NullCustomGraphics,0,[ Remove Graphics ],"/>
            <visualProperty name="NODE_CUSTOMGRAPHICS_POSITION_6" default="C,C,c,0.00,0.00"/>
            <visualProperty name="NODE_LABEL_WIDTH" default="200.0"/>
            <visualProperty name="NODE_SELECTED_PAINT" default="#FFFF00"/>
            <visualProperty name="NODE_FILL_COLOR" default="#C80000"/>
            <visualProperty name="NODE_CUSTOMGRAPHICS_2" default="org.cytoscape.ding.customgraphics.NullCustomGraphics,0,[ Remove Graphics ],"/>
            <visualProperty name="NODE_CUSTOMGRAPHICS_POSITION_4" default="C,C,c,0.00,0.00"/>
            <visualProperty name="NODE_TOOLTIP" default=""/>
            <visualProperty name="NODE_LABEL_TRANSPARENCY" default="255"/>
            <visualProperty name="NODE_WIDTH" default="60.0"/>
            <visualProperty name="NODE_CUSTOMGRAPHICS_POSITION_7" default="C,C,c,0.00,0.00"/>
            <visualProperty name="NODE_SHAPE" default="ELLIPSE"/>
            <visualProperty name="NODE_CUSTOMGRAPHICS_POSITION_9" default="C,C,c,0.00,0.00"/>
            <visualProperty name="NODE_CUSTOMGRAPHICS_4" default="org.cytoscape.ding.customgraphics.NullCustomGraphics,0,[ Remove Graphics ],"/>
            <visualProperty name="NODE_CUSTOMGRAPHICS_7" default="org.cytoscape.ding.customgraphics.NullCustomGraphics,0,[ Remove Graphics ],"/>
            <visualProperty name="NODE_CUSTOMGRAPHICS_3" default="org.cytoscape.ding.customgraphics.NullCustomGraphics,0,[ Remove Graphics ],"/>
            <visualProperty name="NODE_HEIGHT" default="40.0"/>
            <visualProperty name="NODE_CUSTOMGRAPHICS_POSITION_8" default="C,C,c,0.00,0.00"/>
            <visualProperty name="NODE_SELECTED" default="false"/>
            <visualProperty name="NODE_CUSTOMGRAPHICS_SIZE_8" default="0.0"/>
            <visualProperty name="NODE_LABEL_COLOR" default="#000000"/>
            <visualProperty name="NODE_BORDER_STROKE" default="SOLID"/>
            <visualProperty name="NODE_CUSTOMGRAPHICS_SIZE_5" default="0.0"/>
            <visualProperty name="NODE_CUSTOMGRAPHICS_SIZE_4" default="0.0"/>
            <visualProperty name="NODE_VISIBLE" default="true"/>
            <visualProperty name="NODE_BORDER_WIDTH" default="2.0"/>
            <visualProperty name="NODE_LABEL_FONT_SIZE" default="12"/>
            <visualProperty name="NODE_CUSTOMGRAPHICS_SIZE_6" default="0.0"/>
            <visualProperty name="NODE_NESTED_NETWORK_IMAGE_VISIBLE" default="true"/>
            <visualProperty name="NODE_LABEL" default=""/>
            <visualProperty name="NODE_CUSTOMGRAPHICS_SIZE_3" default="0.0"/>
            <visualProperty name="NODE_CUSTOMGRAPHICS_POSITION_5" default="C,C,c,0.00,0.00"/>
        </node>
        <edge>
            <dependency name="arrowColorMatchesEdge" value="false"/>
            <visualProperty name="EDGE_SELECTED" default="false"/>
            <visualProperty name="EDGE_SOURCE_ARROW_UNSELECTED_PAINT" default="#000000"/>
            <visualProperty name="EDGE_TOOLTIP" default=""/>
            <visualProperty name="EDGE_SOURCE_ARROW_SELECTED_PAINT" default="#FFFF00"/>
            <visualProperty name="EDGE_LABEL_TRANSPARENCY" default="255"/>
            <visualProperty name="EDGE_LABEL_FONT_FACE" default="SansSerif.plain,plain,10"/>
            <visualProperty name="EDGE_TARGET_ARROW_SHAPE" default="NONE"/>
            <visualProperty name="EDGE_LABEL_FONT_SIZE" default="10"/>
            <visualProperty name="EDGE_TARGET_ARROW_SIZE" default="6.0"/>
            <visualProperty name="EDGE_VISIBLE" default="true"/>
            <visualProperty name="EDGE_WIDTH" default="1.0"/>
            <visualProperty name="EDGE_TRANSPARENCY" default="255"/>
            <visualProperty name="EDGE_LABEL_WIDTH" default="200.0"/>
            <visualProperty name="EDGE_LABEL_COLOR" default="#000000"/>
            <visualProperty name="EDGE_STROKE_UNSELECTED_PAINT" default="#404040"/>
            <visualProperty name="EDGE_CURVED" default="true"/>
            <visualProperty name="EDGE_SOURCE_ARROW_SIZE" default="6.0"/>
            <visualProperty name="EDGE_STROKE_SELECTED_PAINT" default="#FF0000"/>
            <visualProperty name="EDGE_SOURCE_ARROW_SHAPE" default="NONE"/>
            <visualProperty name="EDGE_LABEL" default=""/>
            <visualProperty name="EDGE_LINE_TYPE" default="SOLID"/>
            <visualProperty name="EDGE_TARGET_ARROW_SELECTED_PAINT" default="#FFFF00"/>
            <visualProperty name="EDGE_TARGET_ARROW_UNSELECTED_PAINT" default="#000000"/>
        </edge>
    </visualStyle>
    <visualStyle name="Nested Network Style">
        <network>
            <visualProperty name="NETWORK_CENTER_X_LOCATION" default="0.0"/>
            <visualProperty name="NETWORK_CENTER_Y_LOCATION" default="0.0"/>
            <visualProperty name="NETWORK_NODE_SELECTION" default="true"/>
            <visualProperty name="NETWORK_DEPTH" default="0.0"/>
            <visualProperty name="NETWORK_BACKGROUND_PAINT" default="#FFFFFF"/>
            <visualProperty name="NETWORK_SCALE_FACTOR" default="1.0"/>
            <visualProperty name="NETWORK_HEIGHT" default="400.0"/>
            <visualProperty name="NETWORK_WIDTH" default="550.0"/>
            <visualProperty name="NETWORK_TITLE" default=""/>
            <visualProperty name="NETWORK_EDGE_SELECTION" default="true"/>
            <visualProperty name="NETWORK_CENTER_Z_LOCATION" default="0.0"/>
        </network>
        <node>
            <dependency name="nodeCustomGraphicsSizeSync" value="false"/>
            <dependency name="nodeSizeLocked" value="false"/>
            <visualProperty name="NODE_Y_LOCATION" default="0.0"/>
            <visualProperty name="COMPOUND_NODE_PADDING" default="10.0"/>
            <visualProperty name="NODE_CUSTOMGRAPHICS_5" default="org.cytoscape.ding.customgraphics.NullCustomGraphics,0,[ Remove Graphics ],"/>
            <visualProperty name="COMPOUND_NODE_SHAPE" default="ROUND_RECTANGLE"/>
            <visualProperty name="NODE_CUSTOMGRAPHICS_POSITION_3" default="C,C,c,0.00,0.00"/>
            <visualProperty name="NODE_CUSTOMGRAPHICS_SIZE_9" default="50.0"/>
            <visualProperty name="NODE_CUSTOMGRAPHICS_SIZE_1" default="50.0"/>
            <visualProperty name="NODE_BORDER_PAINT" default="#000000">
                <discreteMapping attributeType="boolean" attributeName="has_nested_network">
                    <discreteMappingEntry value="#0066CC" attributeValue="true"/>
                </discreteMapping>
            </visualProperty>
            <visualProperty name="NODE_CUSTOMGRAPHICS_1" default="org.cytoscape.ding.customgraphics.NullCustomGraphics,0,[ Remove Graphics ],"/>
            <visualProperty name="NODE_CUSTOMGRAPHICS_8" default="org.cytoscape.ding.customgraphics.NullCustomGraphics,0,[ Remove Graphics ],"/>
            <visualProperty name="NODE_TRANSPARENCY" default="255"/>
            <visualProperty name="NODE_CUSTOMGRAPHICS_SIZE_2" default="50.0"/>
            <visualProperty name="NODE_LABEL_POSITION" default="C,C,c,0.00,0.00">
                <discreteMapping attributeType="boolean" attributeName="has_nested_network">
                    <discreteMappingEntry value="SE,NW,c,0.00,0.00" attributeValue="true"/>
                </discreteMapping>
            </visualProperty>
            <visualProperty name="NODE_Z_LOCATION" default="0.0"/>
            <visualProperty name="NODE_CUSTOMGRAPHICS_POSITION_1" default="C,C,c,0.00,0.00"/>
            <visualProperty name="NODE_DEPTH" default="0.0"/>
            <visualProperty name="NODE_CUSTOMGRAPHICS_SIZE_7" default="50.0"/>
            <visualProperty name="NODE_X_LOCATION" default="0.0"/>
            <visualProperty name="NODE_LABEL_FONT_FACE" default="SansSerif.plain,plain,12"/>
            <visualProperty name="NODE_CUSTOMGRAPHICS_9" default="org.cytoscape.ding.customgraphics.NullCustomGraphics,0,[ Remove Graphics ],"/>
            <visualProperty name="NODE_BORDER_TRANSPARENCY" default="255"/>
            <visualProperty name="NODE_CUSTOMGRAPHICS_POSITION_2" default="C,C,c,0.00,0.00"/>
            <visualProperty name="NODE_CUSTOMGRAPHICS_6" default="org.cytoscape.ding.customgraphics.NullCustomGraphics,0,[ Remove Graphics ],"/>
            <visualProperty name="NODE_CUSTOMGRAPHICS_POSITION_6" default="C,C,c,0.00,0.00"/>
            <visualProperty name="NODE_LABEL_WIDTH" default="200.0"/>
            <visualProperty name="NODE_SELECTED_PAINT" default="#FFFF00"/>
            <visualProperty name="NODE_FILL_COLOR" default="#FFFFFF">
                <discreteMapping attributeType="boolean" attributeName="has_nested_network">
                    <discreteMappingEntry value="#FFFFFF" attributeValue="true"/>
                </discreteMapping>
            </visualProperty>
            <visualProperty name="NODE_CUSTOMGRAPHICS_2" default="org.cytoscape.ding.customgraphics.NullCustomGraphics,0,[ Remove Graphics ],"/>
            <visualProperty name="NODE_CUSTOMGRAPHICS_POSITION_4" default="C,C,c,0.00,0.00"/>
            <visualProperty name="NODE_TOOLTIP" default=""/>
            <visualProperty name="NODE_LABEL_TRANSPARENCY" default="255"/>
            <visualProperty name="NODE_WIDTH" default="60.0"/>
            <visualProperty name="NODE_CUSTOMGRAPHICS_POSITION_7" default="C,C,c,0.00,0.00"/>
            <visualProperty name="NODE_SHAPE" default="ELLIPSE">
                <discreteMapping attributeType="boolean" attributeName="has_nested_network">
                    <discreteMappingEntry value="RECTANGLE" attributeValue="true"/>
                </discreteMapping>
            </visualProperty>
            <visualProperty name="NODE_CUSTOMGRAPHICS_POSITION_9" default="C,C,c,0.00,0.00"/>
            <visualProperty name="NODE_CUSTOMGRAPHICS_4" default="org.cytoscape.ding.customgraphics.NullCustomGraphics,0,[ Remove Graphics ],"/>
            <visualProperty name="NODE_CUSTOMGRAPHICS_7" default="org.cytoscape.ding.customgraphics.NullCustomGraphics,0,[ Remove Graphics ],"/>
            <visualProperty name="NODE_CUSTOMGRAPHICS_3" default="org.cytoscape.ding.customgraphics.NullCustomGraphics,0,[ Remove Graphics ],"/>
            <visualProperty name="NODE_HEIGHT" default="40.0"/>
            <visualProperty name="NODE_CUSTOMGRAPHICS_POSITION_8" default="C,C,c,0.00,0.00"/>
            <visualProperty name="NODE_SELECTED" default="false"/>
            <visualProperty name="NODE_CUSTOMGRAPHICS_SIZE_8" default="50.0"/>
            <visualProperty name="NODE_LABEL_COLOR" default="#000000">
                <discreteMapping attributeType="boolean" attributeName="has_nested_network">
                    <discreteMappingEntry value="#0066CC" attributeValue="true"/>
                </discreteMapping>
            </visualProperty>
            <visualProperty name="NODE_BORDER_STROKE" default="SOLID"/>
            <visualProperty name="NODE_CUSTOMGRAPHICS_SIZE_5" default="50.0"/>
            <visualProperty name="NODE_CUSTOMGRAPHICS_SIZE_4" default="50.0"/>
            <visualProperty name="NODE_VISIBLE" default="true"/>
            <visualProperty name="NODE_BORDER_WIDTH" default="2.0">
                <discreteMapping attributeType="boolean" attributeName="has_nested_network"/>
            </visualProperty>
            <visualProperty name="NODE_LABEL_FONT_SIZE" default="12"/>
            <visualProperty name="NODE_CUSTOMGRAPHICS_SIZE_6" default="50.0"/>
            <visualProperty name="NODE_NESTED_NETWORK_IMAGE_VISIBLE" default="true"/>
            <visualProperty name="NODE_LABEL" default="">
                <passthroughMapping attributeType="string" attributeName="shared name"/>
            </visualProperty>
            <visualProperty name="NODE_CUSTOMGRAPHICS_SIZE_3" default="50.0"/>
            <visualProperty name="NODE_CUSTOMGRAPHICS_POSITION_5" default="C,C,c,0.00,0.00"/>
        </node>
        <edge>
            <dependency name="arrowColorMatchesEdge" value="false"/>
            <visualProperty name="EDGE_SELECTED" default="false"/>
            <visualProperty name="EDGE_SOURCE_ARROW_UNSELECTED_PAINT" default="#000000"/>
            <visualProperty name="EDGE_UNSELECTED_PAINT" default="#404040"/>
            <visualProperty name="EDGE_TOOLTIP" default=""/>
            <visualProperty name="EDGE_SOURCE_ARROW_SELECTED_PAINT" default="#FFFF00"/>
            <visualProperty name="EDGE_LABEL_TRANSPARENCY" default="255"/>
            <visualProperty name="EDGE_LABEL_FONT_FACE" default="SansSerif.plain,plain,10"/>
            <visualProperty name="EDGE_TARGET_ARROW_SHAPE" default="NONE"/>
            <visualProperty name="EDGE_LABEL_FONT_SIZE" default="10"/>
            <visualProperty name="EDGE_TARGET_ARROW_SIZE" default="6.0"/>
            <visualProperty name="EDGE_VISIBLE" default="true"/>
            <visualProperty name="EDGE_WIDTH" default="1.0"/>
            <visualProperty name="EDGE_TRANSPARENCY" default="255"/>
            <visualProperty name="EDGE_LABEL_WIDTH" default="200.0"/>
            <visualProperty name="EDGE_LABEL_COLOR" default="#000000"/>
            <visualProperty name="EDGE_STROKE_UNSELECTED_PAINT" default="#404040"/>
            <visualProperty name="EDGE_PAINT" default="#808080"/>
            <visualProperty name="EDGE_CURVED" default="true"/>
            <visualProperty name="EDGE_SOURCE_ARROW_SIZE" default="6.0"/>
            <visualProperty name="EDGE_STROKE_SELECTED_PAINT" default="#FF0000"/>
            <visualProperty name="EDGE_SOURCE_ARROW_SHAPE" default="NONE"/>
            <visualProperty name="EDGE_LABEL" default=""/>
            <visualProperty name="EDGE_SELECTED_PAINT" default="#FF0000"/>
            <visualProperty name="EDGE_LINE_TYPE" default="SOLID"/>
            <visualProperty name="EDGE_TARGET_ARROW_SELECTED_PAINT" default="#FFFF00"/>
            <visualProperty name="EDGE_TARGET_ARROW_UNSELECTED_PAINT" default="#000000"/>
        </edge>
    </visualStyle>
    <visualStyle name="BioPAX_SIF">
        <network>
            <visualProperty name="NETWORK_BACKGROUND_PAINT" default="#FFFFFF"/>
        </network>
        <node>
            <dependency name="nodeCustomGraphicsSizeSync" value="true"/>
            <dependency name="nodeSizeLocked" value="false"/>
            <visualProperty name="NODE_TRANSPARENCY" default="125"/>
            <visualProperty name="NODE_FILL_COLOR" default="#FF9999">
                <discreteMapping attributeType="string" attributeName="BIOPAX_TYPE">
                    <discreteMappingEntry value="#99CCFF" attributeValue="Complex"/>
                </discreteMapping>
            </visualProperty>
            <visualProperty name="NODE_SHAPE" default="ELLIPSE">
                <discreteMapping attributeType="string" attributeName="BIOPAX_TYPE">
                    <discreteMappingEntry value="HEXAGON" attributeValue="Complex"/>
                </discreteMapping>
            </visualProperty>
            <visualProperty name="NODE_LABEL">
                <passthroughMapping attributeType="string" attributeName="name"/>
            </visualProperty>
        </node>
        <edge>
            <dependency name="arrowColorMatchesEdge" value="true"/>
            <visualProperty name="EDGE_UNSELECTED_PAINT" default="#000000">
                <discreteMapping attributeType="string" attributeName="interaction">
                    <discreteMappingEntry value="#005500" attributeValue="interacts-with"/>
                    <discreteMappingEntry value="#F09000" attributeValue="chemical-affects"/>
                    <discreteMappingEntry value="#0000C0" attributeValue="controls-state-change-of"/>
                    <discreteMappingEntry value="#700000" attributeValue="controls-transport-of"/>
                    <discreteMappingEntry value="#FF3300" attributeValue="consumption-controled-by"/>
                    <discreteMappingEntry value="#00FF00" attributeValue="reacts-with"/>
                    <discreteMappingEntry value="#00AA00" attributeValue="neighbor-of"/>
                    <discreteMappingEntry value="#00A0A0" attributeValue="controls-expression-of"/>
                    <discreteMappingEntry value="#0000FF" attributeValue="controls-phosphorylation-of"/>
                    <discreteMappingEntry value="#A00000" attributeValue="controls-transport-of-chemical"/>
                    <discreteMappingEntry value="#F75500" attributeValue="used-to-produce"/>
                    <discreteMappingEntry value="#F000A0" attributeValue="in-complex-with"/>
                    <discreteMappingEntry value="#00CCF0" attributeValue="controls-production-of"/>
                    <discreteMappingEntry value="#7000A0" attributeValue="catalysis-precedes"/>
                </discreteMapping>
            </visualProperty>
            <visualProperty name="EDGE_TARGET_ARROW_SHAPE">
                <discreteMapping attributeType="string" attributeName="interaction">
                    <discreteMappingEntry value="ARROW" attributeValue="controls-expression-of"/>
                    <discreteMappingEntry value="ARROW" attributeValue="chemical-affects"/>
                    <discreteMappingEntry value="ARROW" attributeValue="controls-state-change-of"/>
                    <discreteMappingEntry value="ARROW" attributeValue="controls-phosphorylation-of"/>
                    <discreteMappingEntry value="ARROW" attributeValue="controls-transport-of-chemical"/>
                    <discreteMappingEntry value="ARROW" attributeValue="used-to-produce"/>
                    <discreteMappingEntry value="ARROW" attributeValue="controls-transport-of"/>
                    <discreteMappingEntry value="ARROW" attributeValue="consumption-controled-by"/>
                    <discreteMappingEntry value="ARROW" attributeValue="controls-production-of"/>
                    <discreteMappingEntry value="ARROW" attributeValue="catalysis-precedes"/>
                </discreteMapping>
            </visualProperty>
            <visualProperty name="EDGE_WIDTH" default="4.0"/>
            <visualProperty name="EDGE_STROKE_UNSELECTED_PAINT" default="#000000">
                <discreteMapping attributeType="string" attributeName="interaction">
                    <discreteMappingEntry value="#005500" attributeValue="interacts-with"/>
                    <discreteMappingEntry value="#F09000" attributeValue="chemical-affects"/>
                    <discreteMappingEntry value="#0000C0" attributeValue="controls-state-change-of"/>
                    <discreteMappingEntry value="#700000" attributeValue="controls-transport-of"/>
                    <discreteMappingEntry value="#FF3300" attributeValue="consumption-controled-by"/>
                    <discreteMappingEntry value="#00FF00" attributeValue="reacts-with"/>
                    <discreteMappingEntry value="#00AA00" attributeValue="neighbor-of"/>
                    <discreteMappingEntry value="#00A0A0" attributeValue="controls-expression-of"/>
                    <discreteMappingEntry value="#0000FF" attributeValue="controls-phosphorylation-of"/>
                    <discreteMappingEntry value="#A00000" attributeValue="controls-transport-of-chemical"/>
                    <discreteMappingEntry value="#F75500" attributeValue="used-to-produce"/>
                    <discreteMappingEntry value="#F000A0" attributeValue="in-complex-with"/>
                    <discreteMappingEntry value="#00CCF0" attributeValue="controls-production-of"/>
                    <discreteMappingEntry value="#7000A0" attributeValue="catalysis-precedes"/>
                </discreteMapping>
            </visualProperty>
        </edge>
    </visualStyle>
    <visualStyle name="Minimal">
        <network>
            <visualProperty name="NETWORK_CENTER_X_LOCATION" default="0.0"/>
            <visualProperty name="NETWORK_CENTER_Y_LOCATION" default="0.0"/>
            <visualProperty name="NETWORK_NODE_SELECTION" default="true"/>
            <visualProperty name="NETWORK_DEPTH" default="0.0"/>
            <visualProperty name="NETWORK_BACKGROUND_PAINT" default="#EBEBEB"/>
            <visualProperty name="NETWORK_SCALE_FACTOR" default="1.0"/>
            <visualProperty name="NETWORK_HEIGHT" default="400.0"/>
            <visualProperty name="NETWORK_WIDTH" default="550.0"/>
            <visualProperty name="NETWORK_SIZE" default="550.0"/>
            <visualProperty name="NETWORK_TITLE" default=""/>
            <visualProperty name="NETWORK_EDGE_SELECTION" default="true"/>
            <visualProperty name="NETWORK_CENTER_Z_LOCATION" default="0.0"/>
        </network>
        <node>
            <dependency name="nodeCustomGraphicsSizeSync" value="true"/>
            <dependency name="nodeSizeLocked" value="true"/>
            <visualProperty name="NODE_Y_LOCATION" default="0.0"/>
            <visualProperty name="COMPOUND_NODE_PADDING" default="10.0"/>
            <visualProperty name="NODE_CUSTOMGRAPHICS_5" default="org.cytoscape.ding.customgraphics.NullCustomGraphics,0,[ Remove Graphics ],"/>
            <visualProperty name="COMPOUND_NODE_SHAPE" default="ROUND_RECTANGLE"/>
            <visualProperty name="NODE_CUSTOMPAINT_9" default="DefaultVisualizableVisualProperty(id=NODE_CUSTOMPAINT_9, name=Node Custom Paint 9)"/>
            <visualProperty name="NODE_CUSTOMGRAPHICS_POSITION_3" default="C,C,c,0.00,0.00"/>
            <visualProperty name="NODE_PAINT" default="#787878"/>
            <visualProperty name="NODE_CUSTOMGRAPHICS_SIZE_9" default="50.0"/>
            <visualProperty name="NODE_CUSTOMGRAPHICS_SIZE_1" default="50.0"/>
            <visualProperty name="NODE_BORDER_PAINT" default="#000000"/>
            <visualProperty name="NODE_CUSTOMGRAPHICS_1" default="org.cytoscape.ding.customgraphics.NullCustomGraphics,0,[ Remove Graphics ],"/>
            <visualProperty name="NODE_CUSTOMGRAPHICS_8" default="org.cytoscape.ding.customgraphics.NullCustomGraphics,0,[ Remove Graphics ],"/>
            <visualProperty name="NODE_TRANSPARENCY" default="255"/>
            <visualProperty name="NODE_CUSTOMGRAPHICS_SIZE_2" default="50.0"/>
            <visualProperty name="NODE_LABEL_POSITION" default="C,C,c,0.00,0.00"/>
            <visualProperty name="NODE_Z_LOCATION" default="0.0"/>
            <visualProperty name="NODE_CUSTOMPAINT_6" default="DefaultVisualizableVisualProperty(id=NODE_CUSTOMPAINT_6, name=Node Custom Paint 6)"/>
            <visualProperty name="NODE_CUSTOMGRAPHICS_POSITION_1" default="C,C,c,0.00,0.00"/>
            <visualProperty name="NODE_DEPTH" default="0.0"/>
            <visualProperty name="NODE_CUSTOMPAINT_2" default="DefaultVisualizableVisualProperty(id=NODE_CUSTOMPAINT_2, name=Node Custom Paint 2)"/>
            <visualProperty name="NODE_CUSTOMGRAPHICS_SIZE_7" default="50.0"/>
            <visualProperty name="NODE_X_LOCATION" default="0.0"/>
            <visualProperty name="NODE_LABEL_FONT_FACE" default="SansSerif.plain,plain,12"/>
            <visualProperty name="NODE_CUSTOMGRAPHICS_9" default="org.cytoscape.ding.customgraphics.NullCustomGraphics,0,[ Remove Graphics ],"/>
            <visualProperty name="NODE_BORDER_TRANSPARENCY" default="255"/>
            <visualProperty name="NODE_CUSTOMGRAPHICS_POSITION_2" default="C,C,c,0.00,0.00"/>
            <visualProperty name="NODE_CUSTOMGRAPHICS_6" default="org.cytoscape.ding.customgraphics.NullCustomGraphics,0,[ Remove Graphics ],"/>
            <visualProperty name="NODE_CUSTOMGRAPHICS_POSITION_6" default="C,C,c,0.00,0.00"/>
            <visualProperty name="NODE_CUSTOMPAINT_7" default="DefaultVisualizableVisualProperty(id=NODE_CUSTOMPAINT_7, name=Node Custom Paint 7)"/>
            <visualProperty name="NODE_LABEL_WIDTH" default="200.0"/>
            <visualProperty name="NODE_SELECTED_PAINT" default="#FFFF00"/>
            <visualProperty name="NODE_FILL_COLOR" default="#FFFFFF"/>
            <visualProperty name="NODE_CUSTOMGRAPHICS_2" default="org.cytoscape.ding.customgraphics.NullCustomGraphics,0,[ Remove Graphics ],"/>
            <visualProperty name="NODE_CUSTOMGRAPHICS_POSITION_4" default="C,C,c,0.00,0.00"/>
            <visualProperty name="NODE_TOOLTIP" default=""/>
            <visualProperty name="NODE_LABEL_TRANSPARENCY" default="255"/>
            <visualProperty name="NODE_WIDTH" default="50.0"/>
            <visualProperty name="NODE_CUSTOMGRAPHICS_POSITION_7" default="C,C,c,0.00,0.00"/>
            <visualProperty name="NODE_SHAPE" default="RECTANGLE"/>
            <visualProperty name="NODE_CUSTOMPAINT_5" default="DefaultVisualizableVisualProperty(id=NODE_CUSTOMPAINT_5, name=Node Custom Paint 5)"/>
            <visualProperty name="NODE_CUSTOMGRAPHICS_POSITION_9" default="C,C,c,0.00,0.00"/>
            <visualProperty name="NODE_CUSTOMGRAPHICS_4" default="org.cytoscape.ding.customgraphics.NullCustomGraphics,0,[ Remove Graphics ],"/>
            <visualProperty name="NODE_CUSTOMGRAPHICS_7" default="org.cytoscape.ding.customgraphics.NullCustomGraphics,0,[ Remove Graphics ],"/>
            <visualProperty name="NODE_CUSTOMGRAPHICS_3" default="org.cytoscape.ding.customgraphics.NullCustomGraphics,0,[ Remove Graphics ],"/>
            <visualProperty name="NODE_CUSTOMPAINT_3" default="DefaultVisualizableVisualProperty(id=NODE_CUSTOMPAINT_3, name=Node Custom Paint 3)"/>
            <visualProperty name="NODE_HEIGHT" default="50.0"/>
            <visualProperty name="NODE_SIZE" default="42.0"/>
            <visualProperty name="NODE_CUSTOMPAINT_1" default="DefaultVisualizableVisualProperty(id=NODE_CUSTOMPAINT_1, name=Node Custom Paint 1)"/>
            <visualProperty name="NODE_CUSTOMPAINT_8" default="DefaultVisualizableVisualProperty(id=NODE_CUSTOMPAINT_8, name=Node Custom Paint 8)"/>
            <visualProperty name="NODE_CUSTOMGRAPHICS_POSITION_8" default="C,C,c,0.00,0.00"/>
            <visualProperty name="NODE_SELECTED" default="false"/>
            <visualProperty name="NODE_CUSTOMGRAPHICS_SIZE_8" default="50.0"/>
            <visualProperty name="NODE_LABEL_COLOR" default="#333333"/>
            <visualProperty name="NODE_BORDER_STROKE" default="SOLID"/>
            <visualProperty name="NODE_CUSTOMGRAPHICS_SIZE_5" default="50.0"/>
            <visualProperty name="NODE_CUSTOMGRAPHICS_SIZE_4" default="50.0"/>
            <visualProperty name="NODE_VISIBLE" default="true"/>
            <visualProperty name="NODE_BORDER_WIDTH" default="0.0"/>
            <visualProperty name="NODE_LABEL_FONT_SIZE" default="9"/>
            <visualProperty name="NODE_CUSTOMGRAPHICS_SIZE_6" default="50.0"/>
            <visualProperty name="NODE_NESTED_NETWORK_IMAGE_VISIBLE" default="true"/>
            <visualProperty name="NODE_LABEL" default="">
                <passthroughMapping attributeType="string" attributeName="name"/>
            </visualProperty>
            <visualProperty name="NODE_CUSTOMPAINT_4" default="DefaultVisualizableVisualProperty(id=NODE_CUSTOMPAINT_4, name=Node Custom Paint 4)"/>
            <visualProperty name="NODE_CUSTOMGRAPHICS_SIZE_3" default="50.0"/>
            <visualProperty name="NODE_CUSTOMGRAPHICS_POSITION_5" default="C,C,c,0.00,0.00"/>
        </node>
        <edge>
            <dependency name="arrowColorMatchesEdge" value="false"/>
            <visualProperty name="EDGE_SELECTED" default="false"/>
            <visualProperty name="EDGE_SOURCE_ARROW_UNSELECTED_PAINT" default="#000000"/>
            <visualProperty name="EDGE_UNSELECTED_PAINT" default="#404040"/>
            <visualProperty name="EDGE_TOOLTIP" default=""/>
            <visualProperty name="EDGE_SOURCE_ARROW_SELECTED_PAINT" default="#FFFF00"/>
            <visualProperty name="EDGE_LABEL_TRANSPARENCY" default="255"/>
            <visualProperty name="EDGE_LABEL_FONT_FACE" default="SansSerif.plain,plain,10"/>
            <visualProperty name="EDGE_TARGET_ARROW_SHAPE" default="NONE"/>
            <visualProperty name="EDGE_LABEL_FONT_SIZE" default="10"/>
            <visualProperty name="EDGE_TARGET_ARROW_SIZE" default="6.0"/>
            <visualProperty name="EDGE_VISIBLE" default="true"/>
            <visualProperty name="EDGE_WIDTH" default="2.0"/>
            <visualProperty name="EDGE_TRANSPARENCY" default="255"/>
            <visualProperty name="EDGE_LABEL_WIDTH" default="200.0"/>
            <visualProperty name="EDGE_LABEL_COLOR" default="#000000"/>
            <visualProperty name="EDGE_STROKE_UNSELECTED_PAINT" default="#4C4C4C"/>
            <visualProperty name="EDGE_PAINT" default="#808080"/>
            <visualProperty name="EDGE_CURVED" default="true"/>
            <visualProperty name="EDGE_SOURCE_ARROW_SIZE" default="6.0"/>
            <visualProperty name="EDGE_BEND" default=""/>
            <visualProperty name="EDGE_STROKE_SELECTED_PAINT" default="#FF0000"/>
            <visualProperty name="EDGE_SOURCE_ARROW_SHAPE" default="NONE"/>
            <visualProperty name="EDGE_LABEL" default=""/>
            <visualProperty name="EDGE_SELECTED_PAINT" default="#FF0000"/>
            <visualProperty name="EDGE_LINE_TYPE" default="SOLID"/>
            <visualProperty name="EDGE_TARGET_ARROW_SELECTED_PAINT" default="#FFFF00"/>
            <visualProperty name="EDGE_TARGET_ARROW_UNSELECTED_PAINT" default="#000000"/>
        </edge>
    </visualStyle>
    <visualStyle name="Solid">
        <network>
            <visualProperty name="NETWORK_CENTER_X_LOCATION" default="0.0"/>
            <visualProperty name="NETWORK_CENTER_Y_LOCATION" default="0.0"/>
            <visualProperty name="NETWORK_NODE_SELECTION" default="true"/>
            <visualProperty name="NETWORK_DEPTH" default="0.0"/>
            <visualProperty name="NETWORK_BACKGROUND_PAINT" default="#FFFFFF"/>
            <visualProperty name="NETWORK_SCALE_FACTOR" default="1.0"/>
            <visualProperty name="NETWORK_HEIGHT" default="400.0"/>
            <visualProperty name="NETWORK_WIDTH" default="550.0"/>
            <visualProperty name="NETWORK_SIZE" default="550.0"/>
            <visualProperty name="NETWORK_TITLE" default=""/>
            <visualProperty name="NETWORK_EDGE_SELECTION" default="true"/>
            <visualProperty name="NETWORK_CENTER_Z_LOCATION" default="0.0"/>
        </network>
        <node>
            <dependency name="nodeCustomGraphicsSizeSync" value="true"/>
            <dependency name="nodeSizeLocked" value="true"/>
            <visualProperty name="NODE_Y_LOCATION" default="0.0"/>
            <visualProperty name="COMPOUND_NODE_PADDING" default="10.0"/>
            <visualProperty name="NODE_CUSTOMGRAPHICS_5" default="org.cytoscape.ding.customgraphics.NullCustomGraphics,0,[ Remove Graphics ],"/>
            <visualProperty name="COMPOUND_NODE_SHAPE" default="ROUND_RECTANGLE"/>
            <visualProperty name="NODE_CUSTOMPAINT_9" default="DefaultVisualizableVisualProperty(id=NODE_CUSTOMPAINT_9, name=Node Custom Paint 9)"/>
            <visualProperty name="NODE_CUSTOMGRAPHICS_POSITION_3" default="C,C,c,0.00,0.00"/>
            <visualProperty name="NODE_PAINT" default="#787878"/>
            <visualProperty name="NODE_CUSTOMGRAPHICS_SIZE_9" default="50.0"/>
            <visualProperty name="NODE_CUSTOMGRAPHICS_SIZE_1" default="50.0"/>
            <visualProperty name="NODE_BORDER_PAINT" default="#000000"/>
            <visualProperty name="NODE_CUSTOMGRAPHICS_1" default="org.cytoscape.ding.customgraphics.NullCustomGraphics,0,[ Remove Graphics ],"/>
            <visualProperty name="NODE_CUSTOMGRAPHICS_8" default="org.cytoscape.ding.customgraphics.NullCustomGraphics,0,[ Remove Graphics ],"/>
            <visualProperty name="NODE_TRANSPARENCY" default="255"/>
            <visualProperty name="NODE_CUSTOMGRAPHICS_SIZE_2" default="50.0"/>
            <visualProperty name="NODE_LABEL_POSITION" default="C,C,c,0.00,0.00"/>
            <visualProperty name="NODE_Z_LOCATION" default="0.0"/>
            <visualProperty name="NODE_CUSTOMPAINT_6" default="DefaultVisualizableVisualProperty(id=NODE_CUSTOMPAINT_6, name=Node Custom Paint 6)"/>
            <visualProperty name="NODE_CUSTOMGRAPHICS_POSITION_1" default="C,C,c,0.00,0.00"/>
            <visualProperty name="NODE_DEPTH" default="0.0"/>
            <visualProperty name="NODE_CUSTOMPAINT_2" default="DefaultVisualizableVisualProperty(id=NODE_CUSTOMPAINT_2, name=Node Custom Paint 2)"/>
            <visualProperty name="NODE_CUSTOMGRAPHICS_SIZE_7" default="50.0"/>
            <visualProperty name="NODE_X_LOCATION" default="0.0"/>
            <visualProperty name="NODE_LABEL_FONT_FACE" default="Dialog.plain,plain,12"/>
            <visualProperty name="NODE_CUSTOMGRAPHICS_9" default="org.cytoscape.ding.customgraphics.NullCustomGraphics,0,[ Remove Graphics ],"/>
            <visualProperty name="NODE_BORDER_TRANSPARENCY" default="255"/>
            <visualProperty name="NODE_CUSTOMGRAPHICS_POSITION_2" default="C,C,c,0.00,0.00"/>
            <visualProperty name="NODE_CUSTOMGRAPHICS_6" default="org.cytoscape.ding.customgraphics.NullCustomGraphics,0,[ Remove Graphics ],"/>
            <visualProperty name="NODE_CUSTOMGRAPHICS_POSITION_6" default="C,C,c,0.00,0.00"/>
            <visualProperty name="NODE_CUSTOMPAINT_7" default="DefaultVisualizableVisualProperty(id=NODE_CUSTOMPAINT_7, name=Node Custom Paint 7)"/>
            <visualProperty name="NODE_LABEL_WIDTH" default="200.0"/>
            <visualProperty name="NODE_SELECTED_PAINT" default="#FFFF00"/>
            <visualProperty name="NODE_FILL_COLOR" default="#666666"/>
            <visualProperty name="NODE_CUSTOMGRAPHICS_2" default="org.cytoscape.ding.customgraphics.NullCustomGraphics,0,[ Remove Graphics ],"/>
            <visualProperty name="NODE_CUSTOMGRAPHICS_POSITION_4" default="C,C,c,0.00,0.00"/>
            <visualProperty name="NODE_TOOLTIP" default=""/>
            <visualProperty name="NODE_LABEL_TRANSPARENCY" default="255"/>
            <visualProperty name="NODE_WIDTH" default="70.0"/>
            <visualProperty name="NODE_CUSTOMGRAPHICS_POSITION_7" default="C,C,c,0.00,0.00"/>
            <visualProperty name="NODE_SHAPE" default="ELLIPSE"/>
            <visualProperty name="NODE_CUSTOMPAINT_5" default="DefaultVisualizableVisualProperty(id=NODE_CUSTOMPAINT_5, name=Node Custom Paint 5)"/>
            <visualProperty name="NODE_CUSTOMGRAPHICS_POSITION_9" default="C,C,c,0.00,0.00"/>
            <visualProperty name="NODE_CUSTOMGRAPHICS_4" default="org.cytoscape.ding.customgraphics.NullCustomGraphics,0,[ Remove Graphics ],"/>
            <visualProperty name="NODE_CUSTOMGRAPHICS_7" default="org.cytoscape.ding.customgraphics.NullCustomGraphics,0,[ Remove Graphics ],"/>
            <visualProperty name="NODE_CUSTOMGRAPHICS_3" default="org.cytoscape.ding.customgraphics.NullCustomGraphics,0,[ Remove Graphics ],"/>
            <visualProperty name="NODE_CUSTOMPAINT_3" default="DefaultVisualizableVisualProperty(id=NODE_CUSTOMPAINT_3, name=Node Custom Paint 3)"/>
            <visualProperty name="NODE_HEIGHT" default="70.0"/>
            <visualProperty name="NODE_SIZE" default="40.0"/>
            <visualProperty name="NODE_CUSTOMPAINT_1" default="DefaultVisualizableVisualProperty(id=NODE_CUSTOMPAINT_1, name=Node Custom Paint 1)"/>
            <visualProperty name="NODE_CUSTOMPAINT_8" default="DefaultVisualizableVisualProperty(id=NODE_CUSTOMPAINT_8, name=Node Custom Paint 8)"/>
            <visualProperty name="NODE_CUSTOMGRAPHICS_POSITION_8" default="C,C,c,0.00,0.00"/>
            <visualProperty name="NODE_SELECTED" default="false"/>
            <visualProperty name="NODE_CUSTOMGRAPHICS_SIZE_8" default="50.0"/>
            <visualProperty name="NODE_LABEL_COLOR" default="#000000"/>
            <visualProperty name="NODE_BORDER_STROKE" default="SOLID"/>
            <visualProperty name="NODE_CUSTOMGRAPHICS_SIZE_5" default="50.0"/>
            <visualProperty name="NODE_CUSTOMGRAPHICS_SIZE_4" default="50.0"/>
            <visualProperty name="NODE_VISIBLE" default="true"/>
            <visualProperty name="NODE_BORDER_WIDTH" default="0.0"/>
            <visualProperty name="NODE_LABEL_FONT_SIZE" default="14"/>
            <visualProperty name="NODE_CUSTOMGRAPHICS_SIZE_6" default="50.0"/>
            <visualProperty name="NODE_NESTED_NETWORK_IMAGE_VISIBLE" default="true"/>
            <visualProperty name="NODE_LABEL" default="">
                <passthroughMapping attributeType="string" attributeName="name"/>
            </visualProperty>
            <visualProperty name="NODE_CUSTOMPAINT_4" default="DefaultVisualizableVisualProperty(id=NODE_CUSTOMPAINT_4, name=Node Custom Paint 4)"/>
            <visualProperty name="NODE_CUSTOMGRAPHICS_SIZE_3" default="50.0"/>
            <visualProperty name="NODE_CUSTOMGRAPHICS_POSITION_5" default="C,C,c,0.00,0.00"/>
        </node>
        <edge>
            <dependency name="arrowColorMatchesEdge" value="false"/>
            <visualProperty name="EDGE_SELECTED" default="false"/>
            <visualProperty name="EDGE_SOURCE_ARROW_UNSELECTED_PAINT" default="#000000"/>
            <visualProperty name="EDGE_UNSELECTED_PAINT" default="#404040"/>
            <visualProperty name="EDGE_TOOLTIP" default=""/>
            <visualProperty name="EDGE_SOURCE_ARROW_SELECTED_PAINT" default="#FFFF00"/>
            <visualProperty name="EDGE_LABEL_TRANSPARENCY" default="255"/>
            <visualProperty name="EDGE_LABEL_FONT_FACE" default="Dialog.plain,plain,10"/>
            <visualProperty name="EDGE_TARGET_ARROW_SHAPE" default="NONE"/>
            <visualProperty name="EDGE_LABEL_FONT_SIZE" default="10"/>
            <visualProperty name="EDGE_TARGET_ARROW_SIZE" default="6.0"/>
            <visualProperty name="EDGE_VISIBLE" default="true"/>
            <visualProperty name="EDGE_WIDTH" default="12.0"/>
            <visualProperty name="EDGE_TRANSPARENCY" default="255"/>
            <visualProperty name="EDGE_LABEL_WIDTH" default="200.0"/>
            <visualProperty name="EDGE_LABEL_COLOR" default="#000000"/>
            <visualProperty name="EDGE_STROKE_UNSELECTED_PAINT" default="#CCCCCC"/>
            <visualProperty name="EDGE_PAINT" default="#323232"/>
            <visualProperty name="EDGE_CURVED" default="true"/>
            <visualProperty name="EDGE_SOURCE_ARROW_SIZE" default="6.0"/>
            <visualProperty name="EDGE_BEND" default=""/>
            <visualProperty name="EDGE_STROKE_SELECTED_PAINT" default="#FF0000"/>
            <visualProperty name="EDGE_SOURCE_ARROW_SHAPE" default="NONE"/>
            <visualProperty name="EDGE_LABEL" default="">
                <passthroughMapping attributeType="string" attributeName="interaction"/>
            </visualProperty>
            <visualProperty name="EDGE_SELECTED_PAINT" default="#FF0000"/>
            <visualProperty name="EDGE_LINE_TYPE" default="SOLID"/>
            <visualProperty name="EDGE_TARGET_ARROW_SELECTED_PAINT" default="#FFFF00"/>
            <visualProperty name="EDGE_TARGET_ARROW_UNSELECTED_PAINT" default="#000000"/>
        </edge>
    </visualStyle>
    <visualStyle name="Big Labels">
        <network>
            <visualProperty name="NETWORK_CENTER_X_LOCATION" default="0.0"/>
            <visualProperty name="NETWORK_CENTER_Y_LOCATION" default="0.0"/>
            <visualProperty name="NETWORK_NODE_SELECTION" default="true"/>
            <visualProperty name="NETWORK_DEPTH" default="0.0"/>
            <visualProperty name="NETWORK_BACKGROUND_PAINT" default="#FFFFFF"/>
            <visualProperty name="NETWORK_SCALE_FACTOR" default="1.0"/>
            <visualProperty name="NETWORK_HEIGHT" default="400.0"/>
            <visualProperty name="NETWORK_WIDTH" default="550.0"/>
            <visualProperty name="NETWORK_SIZE" default="550.0"/>
            <visualProperty name="NETWORK_TITLE" default=""/>
            <visualProperty name="NETWORK_EDGE_SELECTION" default="true"/>
            <visualProperty name="NETWORK_CENTER_Z_LOCATION" default="0.0"/>
        </network>
        <node>
            <dependency name="nodeCustomGraphicsSizeSync" value="true"/>
            <dependency name="nodeSizeLocked" value="true"/>
            <visualProperty name="NODE_Y_LOCATION" default="0.0"/>
            <visualProperty name="COMPOUND_NODE_PADDING" default="10.0"/>
            <visualProperty name="NODE_CUSTOMGRAPHICS_5" default="org.cytoscape.ding.customgraphics.NullCustomGraphics,0,[ Remove Graphics ],"/>
            <visualProperty name="COMPOUND_NODE_SHAPE" default="ROUND_RECTANGLE"/>
            <visualProperty name="NODE_CUSTOMPAINT_9" default="DefaultVisualizableVisualProperty(id=NODE_CUSTOMPAINT_9, name=Node Custom Paint 9)"/>
            <visualProperty name="NODE_CUSTOMGRAPHICS_POSITION_3" default="C,C,c,0.00,0.00"/>
            <visualProperty name="NODE_PAINT" default="#787878"/>
            <visualProperty name="NODE_CUSTOMGRAPHICS_SIZE_9" default="50.0"/>
            <visualProperty name="NODE_CUSTOMGRAPHICS_SIZE_1" default="50.0"/>
            <visualProperty name="NODE_BORDER_PAINT" default="#000000"/>
            <visualProperty name="NODE_CUSTOMGRAPHICS_1" default="org.cytoscape.ding.customgraphics.NullCustomGraphics,0,[ Remove Graphics ],"/>
            <visualProperty name="NODE_CUSTOMGRAPHICS_8" default="org.cytoscape.ding.customgraphics.NullCustomGraphics,0,[ Remove Graphics ],"/>
            <visualProperty name="NODE_TRANSPARENCY" default="255"/>
            <visualProperty name="NODE_CUSTOMGRAPHICS_SIZE_2" default="50.0"/>
            <visualProperty name="NODE_LABEL_POSITION" default="C,C,c,0.00,0.00"/>
            <visualProperty name="NODE_Z_LOCATION" default="0.0"/>
            <visualProperty name="NODE_CUSTOMPAINT_6" default="DefaultVisualizableVisualProperty(id=NODE_CUSTOMPAINT_6, name=Node Custom Paint 6)"/>
            <visualProperty name="NODE_CUSTOMGRAPHICS_POSITION_1" default="C,C,c,0.00,0.00"/>
            <visualProperty name="NODE_DEPTH" default="0.0"/>
            <visualProperty name="NODE_CUSTOMPAINT_2" default="DefaultVisualizableVisualProperty(id=NODE_CUSTOMPAINT_2, name=Node Custom Paint 2)"/>
            <visualProperty name="NODE_CUSTOMGRAPHICS_SIZE_7" default="50.0"/>
            <visualProperty name="NODE_X_LOCATION" default="0.0"/>
            <visualProperty name="NODE_LABEL_FONT_FACE" default="SansSerif.plain,plain,12"/>
            <visualProperty name="NODE_CUSTOMGRAPHICS_9" default="org.cytoscape.ding.customgraphics.NullCustomGraphics,0,[ Remove Graphics ],"/>
            <visualProperty name="NODE_BORDER_TRANSPARENCY" default="255"/>
            <visualProperty name="NODE_CUSTOMGRAPHICS_POSITION_2" default="C,C,c,0.00,0.00"/>
            <visualProperty name="NODE_CUSTOMGRAPHICS_6" default="org.cytoscape.ding.customgraphics.NullCustomGraphics,0,[ Remove Graphics ],"/>
            <visualProperty name="NODE_CUSTOMGRAPHICS_POSITION_6" default="C,C,c,0.00,0.00"/>
            <visualProperty name="NODE_CUSTOMPAINT_7" default="DefaultVisualizableVisualProperty(id=NODE_CUSTOMPAINT_7, name=Node Custom Paint 7)"/>
            <visualProperty name="NODE_LABEL_WIDTH" default="200.0"/>
            <visualProperty name="NODE_SELECTED_PAINT" default="#FF0066"/>
            <visualProperty name="NODE_FILL_COLOR" default="#FFFFFF"/>
            <visualProperty name="NODE_CUSTOMGRAPHICS_2" default="org.cytoscape.ding.customgraphics.NullCustomGraphics,0,[ Remove Graphics ],"/>
            <visualProperty name="NODE_CUSTOMGRAPHICS_POSITION_4" default="C,C,c,0.00,0.00"/>
            <visualProperty name="NODE_TOOLTIP" default=""/>
            <visualProperty name="NODE_LABEL_TRANSPARENCY" default="255"/>
            <visualProperty name="NODE_WIDTH" default="30.0"/>
            <visualProperty name="NODE_CUSTOMGRAPHICS_POSITION_7" default="C,C,c,0.00,0.00"/>
            <visualProperty name="NODE_SHAPE" default="ELLIPSE"/>
            <visualProperty name="NODE_CUSTOMPAINT_5" default="DefaultVisualizableVisualProperty(id=NODE_CUSTOMPAINT_5, name=Node Custom Paint 5)"/>
            <visualProperty name="NODE_CUSTOMGRAPHICS_POSITION_9" default="C,C,c,0.00,0.00"/>
            <visualProperty name="NODE_CUSTOMGRAPHICS_4" default="org.cytoscape.ding.customgraphics.NullCustomGraphics,0,[ Remove Graphics ],"/>
            <visualProperty name="NODE_CUSTOMGRAPHICS_7" default="org.cytoscape.ding.customgraphics.NullCustomGraphics,0,[ Remove Graphics ],"/>
            <visualProperty name="NODE_CUSTOMGRAPHICS_3" default="org.cytoscape.ding.customgraphics.NullCustomGraphics,0,[ Remove Graphics ],"/>
            <visualProperty name="NODE_CUSTOMPAINT_3" default="DefaultVisualizableVisualProperty(id=NODE_CUSTOMPAINT_3, name=Node Custom Paint 3)"/>
            <visualProperty name="NODE_HEIGHT" default="30.0"/>
            <visualProperty name="NODE_SIZE" default="5.0"/>
            <visualProperty name="NODE_CUSTOMPAINT_1" default="DefaultVisualizableVisualProperty(id=NODE_CUSTOMPAINT_1, name=Node Custom Paint 1)"/>
            <visualProperty name="NODE_CUSTOMPAINT_8" default="DefaultVisualizableVisualProperty(id=NODE_CUSTOMPAINT_8, name=Node Custom Paint 8)"/>
            <visualProperty name="NODE_CUSTOMGRAPHICS_POSITION_8" default="C,C,c,0.00,0.00"/>
            <visualProperty name="NODE_SELECTED" default="false"/>
            <visualProperty name="NODE_CUSTOMGRAPHICS_SIZE_8" default="50.0"/>
            <visualProperty name="NODE_LABEL_COLOR" default="#333333"/>
            <visualProperty name="NODE_BORDER_STROKE" default="SOLID"/>
            <visualProperty name="NODE_CUSTOMGRAPHICS_SIZE_5" default="50.0"/>
            <visualProperty name="NODE_CUSTOMGRAPHICS_SIZE_4" default="50.0"/>
            <visualProperty name="NODE_VISIBLE" default="true"/>
            <visualProperty name="NODE_BORDER_WIDTH" default="0.0"/>
            <visualProperty name="NODE_LABEL_FONT_SIZE" default="24"/>
            <visualProperty name="NODE_CUSTOMGRAPHICS_SIZE_6" default="50.0"/>
            <visualProperty name="NODE_NESTED_NETWORK_IMAGE_VISIBLE" default="true"/>
            <visualProperty name="NODE_LABEL" default="">
                <passthroughMapping attributeType="string" attributeName="name"/>
            </visualProperty>
            <visualProperty name="NODE_CUSTOMPAINT_4" default="DefaultVisualizableVisualProperty(id=NODE_CUSTOMPAINT_4, name=Node Custom Paint 4)"/>
            <visualProperty name="NODE_CUSTOMGRAPHICS_SIZE_3" default="50.0"/>
            <visualProperty name="NODE_CUSTOMGRAPHICS_POSITION_5" default="C,C,c,0.00,0.00"/>
        </node>
        <edge>
            <dependency name="arrowColorMatchesEdge" value="false"/>
            <visualProperty name="EDGE_SELECTED" default="false"/>
            <visualProperty name="EDGE_SOURCE_ARROW_UNSELECTED_PAINT" default="#000000"/>
            <visualProperty name="EDGE_UNSELECTED_PAINT" default="#404040"/>
            <visualProperty name="EDGE_TOOLTIP" default=""/>
            <visualProperty name="EDGE_SOURCE_ARROW_SELECTED_PAINT" default="#FFFF00"/>
            <visualProperty name="EDGE_LABEL_TRANSPARENCY" default="255"/>
            <visualProperty name="EDGE_LABEL_FONT_FACE" default="SansSerif.plain,plain,10"/>
            <visualProperty name="EDGE_TARGET_ARROW_SHAPE" default="NONE"/>
            <visualProperty name="EDGE_LABEL_FONT_SIZE" default="10"/>
            <visualProperty name="EDGE_TARGET_ARROW_SIZE" default="6.0"/>
            <visualProperty name="EDGE_VISIBLE" default="true"/>
            <visualProperty name="EDGE_WIDTH" default="1.0"/>
            <visualProperty name="EDGE_TRANSPARENCY" default="255"/>
            <visualProperty name="EDGE_LABEL_WIDTH" default="200.0"/>
            <visualProperty name="EDGE_LABEL_COLOR" default="#000000"/>
            <visualProperty name="EDGE_STROKE_UNSELECTED_PAINT" default="#B7B7B7"/>
            <visualProperty name="EDGE_PAINT" default="#808080"/>
            <visualProperty name="EDGE_CURVED" default="true"/>
            <visualProperty name="EDGE_SOURCE_ARROW_SIZE" default="6.0"/>
            <visualProperty name="EDGE_BEND" default=""/>
            <visualProperty name="EDGE_STROKE_SELECTED_PAINT" default="#FF0000"/>
            <visualProperty name="EDGE_SOURCE_ARROW_SHAPE" default="NONE"/>
            <visualProperty name="EDGE_LABEL" default=""/>
            <visualProperty name="EDGE_SELECTED_PAINT" default="#FF0000"/>
            <visualProperty name="EDGE_LINE_TYPE" default="SOLID"/>
            <visualProperty name="EDGE_TARGET_ARROW_SELECTED_PAINT" default="#FFFF00"/>
            <visualProperty name="EDGE_TARGET_ARROW_UNSELECTED_PAINT" default="#000000"/>
        </edge>
    </visualStyle>
    <visualStyle name="Directed">
        <network>
            <visualProperty name="NETWORK_CENTER_X_LOCATION" default="0.0"/>
            <visualProperty name="NETWORK_CENTER_Y_LOCATION" default="0.0"/>
            <visualProperty name="NETWORK_NODE_SELECTION" default="true"/>
            <visualProperty name="NETWORK_DEPTH" default="0.0"/>
            <visualProperty name="NETWORK_BACKGROUND_PAINT" default="#FFFFFF"/>
            <visualProperty name="NETWORK_SCALE_FACTOR" default="1.0"/>
            <visualProperty name="NETWORK_HEIGHT" default="400.0"/>
            <visualProperty name="NETWORK_WIDTH" default="550.0"/>
            <visualProperty name="NETWORK_SIZE" default="550.0"/>
            <visualProperty name="NETWORK_TITLE" default=""/>
            <visualProperty name="NETWORK_EDGE_SELECTION" default="true"/>
            <visualProperty name="NETWORK_CENTER_Z_LOCATION" default="0.0"/>
        </network>
        <node>
            <dependency name="nodeCustomGraphicsSizeSync" value="true"/>
            <dependency name="nodeSizeLocked" value="true"/>
            <visualProperty name="NODE_Y_LOCATION" default="0.0"/>
            <visualProperty name="COMPOUND_NODE_PADDING" default="10.0"/>
            <visualProperty name="NODE_CUSTOMGRAPHICS_5" default="org.cytoscape.ding.customgraphics.NullCustomGraphics,0,[ Remove Graphics ],"/>
            <visualProperty name="COMPOUND_NODE_SHAPE" default="ROUND_RECTANGLE"/>
            <visualProperty name="NODE_CUSTOMPAINT_9" default="DefaultVisualizableVisualProperty(id=NODE_CUSTOMPAINT_9, name=Node Custom Paint 9)"/>
            <visualProperty name="NODE_CUSTOMGRAPHICS_POSITION_3" default="C,C,c,0.00,0.00"/>
            <visualProperty name="NODE_PAINT" default="#787878"/>
            <visualProperty name="NODE_CUSTOMGRAPHICS_SIZE_9" default="50.0"/>
            <visualProperty name="NODE_CUSTOMGRAPHICS_SIZE_1" default="50.0"/>
            <visualProperty name="NODE_BORDER_PAINT" default="#919191"/>
            <visualProperty name="NODE_CUSTOMGRAPHICS_1" default="org.cytoscape.ding.customgraphics.NullCustomGraphics,0,[ Remove Graphics ],"/>
            <visualProperty name="NODE_CUSTOMGRAPHICS_8" default="org.cytoscape.ding.customgraphics.NullCustomGraphics,0,[ Remove Graphics ],"/>
            <visualProperty name="NODE_TRANSPARENCY" default="255"/>
            <visualProperty name="NODE_CUSTOMGRAPHICS_SIZE_2" default="50.0"/>
            <visualProperty name="NODE_LABEL_POSITION" default="C,C,c,0.00,0.00"/>
            <visualProperty name="NODE_Z_LOCATION" default="0.0"/>
            <visualProperty name="NODE_CUSTOMPAINT_6" default="DefaultVisualizableVisualProperty(id=NODE_CUSTOMPAINT_6, name=Node Custom Paint 6)"/>
            <visualProperty name="NODE_CUSTOMGRAPHICS_POSITION_1" default="C,C,c,0.00,0.00"/>
            <visualProperty name="NODE_DEPTH" default="0.0"/>
            <visualProperty name="NODE_CUSTOMPAINT_2" default="DefaultVisualizableVisualProperty(id=NODE_CUSTOMPAINT_2, name=Node Custom Paint 2)"/>
            <visualProperty name="NODE_CUSTOMGRAPHICS_SIZE_7" default="50.0"/>
            <visualProperty name="NODE_X_LOCATION" default="0.0"/>
            <visualProperty name="NODE_LABEL_FONT_FACE" default="SansSerif.plain,plain,12"/>
            <visualProperty name="NODE_CUSTOMGRAPHICS_9" default="org.cytoscape.ding.customgraphics.NullCustomGraphics,0,[ Remove Graphics ],"/>
            <visualProperty name="NODE_BORDER_TRANSPARENCY" default="255"/>
            <visualProperty name="NODE_CUSTOMGRAPHICS_POSITION_2" default="C,C,c,0.00,0.00"/>
            <visualProperty name="NODE_CUSTOMGRAPHICS_6" default="org.cytoscape.ding.customgraphics.NullCustomGraphics,0,[ Remove Graphics ],"/>
            <visualProperty name="NODE_CUSTOMGRAPHICS_POSITION_6" default="C,C,c,0.00,0.00"/>
            <visualProperty name="NODE_CUSTOMPAINT_7" default="DefaultVisualizableVisualProperty(id=NODE_CUSTOMPAINT_7, name=Node Custom Paint 7)"/>
            <visualProperty name="NODE_LABEL_WIDTH" default="200.0"/>
            <visualProperty name="NODE_SELECTED_PAINT" default="#FF0066"/>
            <visualProperty name="NODE_FILL_COLOR" default="#FFFFFF"/>
            <visualProperty name="NODE_CUSTOMGRAPHICS_2" default="org.cytoscape.ding.customgraphics.NullCustomGraphics,0,[ Remove Graphics ],"/>
            <visualProperty name="NODE_CUSTOMGRAPHICS_POSITION_4" default="C,C,c,0.00,0.00"/>
            <visualProperty name="NODE_TOOLTIP" default=""/>
            <visualProperty name="NODE_LABEL_TRANSPARENCY" default="255"/>
            <visualProperty name="NODE_WIDTH" default="50.0"/>
            <visualProperty name="NODE_CUSTOMGRAPHICS_POSITION_7" default="C,C,c,0.00,0.00"/>
            <visualProperty name="NODE_SHAPE" default="ELLIPSE">
                <discreteMapping attributeType="string" attributeName="NodeType">
                    <discreteMappingEntry value="TRIANGLE" attributeValue="Drugs"/>
                    <discreteMappingEntry value="HEXAGON" attributeValue="Metabolite"/>
                    <discreteMappingEntry value="DIAMOND" attributeValue="Process"/>
                    <discreteMappingEntry value="ELLIPSE" attributeValue="Protein"/>
                </discreteMapping>
            </visualProperty>
            <visualProperty name="NODE_CUSTOMPAINT_5" default="DefaultVisualizableVisualProperty(id=NODE_CUSTOMPAINT_5, name=Node Custom Paint 5)"/>
            <visualProperty name="NODE_CUSTOMGRAPHICS_POSITION_9" default="C,C,c,0.00,0.00"/>
            <visualProperty name="NODE_CUSTOMGRAPHICS_4" default="org.cytoscape.ding.customgraphics.NullCustomGraphics,0,[ Remove Graphics ],"/>
            <visualProperty name="NODE_CUSTOMGRAPHICS_7" default="org.cytoscape.ding.customgraphics.NullCustomGraphics,0,[ Remove Graphics ],"/>
            <visualProperty name="NODE_CUSTOMGRAPHICS_3" default="org.cytoscape.ding.customgraphics.NullCustomGraphics,0,[ Remove Graphics ],"/>
            <visualProperty name="NODE_CUSTOMPAINT_3" default="DefaultVisualizableVisualProperty(id=NODE_CUSTOMPAINT_3, name=Node Custom Paint 3)"/>
            <visualProperty name="NODE_HEIGHT" default="50.0"/>
            <visualProperty name="NODE_SIZE" default="45.0"/>
            <visualProperty name="NODE_CUSTOMPAINT_1" default="DefaultVisualizableVisualProperty(id=NODE_CUSTOMPAINT_1, name=Node Custom Paint 1)"/>
            <visualProperty name="NODE_CUSTOMPAINT_8" default="DefaultVisualizableVisualProperty(id=NODE_CUSTOMPAINT_8, name=Node Custom Paint 8)"/>
            <visualProperty name="NODE_CUSTOMGRAPHICS_POSITION_8" default="C,C,c,0.00,0.00"/>
            <visualProperty name="NODE_SELECTED" default="false"/>
            <visualProperty name="NODE_CUSTOMGRAPHICS_SIZE_8" default="50.0"/>
            <visualProperty name="NODE_LABEL_COLOR" default="#3399FF"/>
            <visualProperty name="NODE_BORDER_STROKE" default="SOLID"/>
            <visualProperty name="NODE_CUSTOMGRAPHICS_SIZE_5" default="50.0"/>
            <visualProperty name="NODE_CUSTOMGRAPHICS_SIZE_4" default="50.0"/>
            <visualProperty name="NODE_VISIBLE" default="true"/>
            <visualProperty name="NODE_BORDER_WIDTH" default="5.0"/>
            <visualProperty name="NODE_LABEL_FONT_SIZE" default="8"/>
            <visualProperty name="NODE_CUSTOMGRAPHICS_SIZE_6" default="50.0"/>
            <visualProperty name="NODE_NESTED_NETWORK_IMAGE_VISIBLE" default="true"/>
            <visualProperty name="NODE_LABEL" default="">
                <passthroughMapping attributeType="string" attributeName="name"/>
            </visualProperty>
            <visualProperty name="NODE_CUSTOMPAINT_4" default="DefaultVisualizableVisualProperty(id=NODE_CUSTOMPAINT_4, name=Node Custom Paint 4)"/>
            <visualProperty name="NODE_CUSTOMGRAPHICS_SIZE_3" default="50.0"/>
            <visualProperty name="NODE_CUSTOMGRAPHICS_POSITION_5" default="C,C,c,0.00,0.00"/>
        </node>
        <edge>
            <dependency name="arrowColorMatchesEdge" value="true"/>
            <visualProperty name="EDGE_SELECTED" default="false"/>
            <visualProperty name="EDGE_SOURCE_ARROW_UNSELECTED_PAINT" default="#000000"/>
            <visualProperty name="EDGE_UNSELECTED_PAINT" default="#CCCCCC"/>
            <visualProperty name="EDGE_TOOLTIP" default=""/>
            <visualProperty name="EDGE_SOURCE_ARROW_SELECTED_PAINT" default="#FFFF00"/>
            <visualProperty name="EDGE_LABEL_TRANSPARENCY" default="255"/>
            <visualProperty name="EDGE_LABEL_FONT_FACE" default="SansSerif.plain,plain,12"/>
            <visualProperty name="EDGE_TARGET_ARROW_SHAPE" default="ARROW"/>
            <visualProperty name="EDGE_LABEL_FONT_SIZE" default="12"/>
            <visualProperty name="EDGE_TARGET_ARROW_SIZE" default="6.0"/>
            <visualProperty name="EDGE_VISIBLE" default="true"/>
            <visualProperty name="EDGE_WIDTH" default="5.0"/>
            <visualProperty name="EDGE_TRANSPARENCY" default="255"/>
            <visualProperty name="EDGE_LABEL_WIDTH" default="200.0"/>
            <visualProperty name="EDGE_LABEL_COLOR" default="#3399FF"/>
            <visualProperty name="EDGE_STROKE_UNSELECTED_PAINT" default="#969696"/>
            <visualProperty name="EDGE_PAINT" default="#808080"/>
            <visualProperty name="EDGE_CURVED" default="true"/>
            <visualProperty name="EDGE_SOURCE_ARROW_SIZE" default="6.0"/>
            <visualProperty name="EDGE_BEND" default=""/>
            <visualProperty name="EDGE_STROKE_SELECTED_PAINT" default="#FF0000"/>
            <visualProperty name="EDGE_SOURCE_ARROW_SHAPE" default="NONE"/>
            <visualProperty name="EDGE_LABEL" default="">
                <passthroughMapping attributeType="string" attributeName="interaction"/>
            </visualProperty>
            <visualProperty name="EDGE_SELECTED_PAINT" default="#FF0000"/>
            <visualProperty name="EDGE_LINE_TYPE" default="SOLID"/>
            <visualProperty name="EDGE_TARGET_ARROW_SELECTED_PAINT" default="#FFFF00"/>
            <visualProperty name="EDGE_TARGET_ARROW_UNSELECTED_PAINT" default="#333333"/>
        </edge>
    </visualStyle>
    <visualStyle name="MetFlexLog2">
        <network>
            <visualProperty name="NETWORK_CENTER_X_LOCATION" default="0.0"/>
            <visualProperty name="NETWORK_CENTER_Y_LOCATION" default="0.0"/>
            <visualProperty name="NETWORK_NODE_SELECTION" default="true"/>
            <visualProperty name="NETWORK_DEPTH" default="0.0"/>
            <visualProperty name="NETWORK_BACKGROUND_PAINT" default="#FFFFFF"/>
            <visualProperty name="NETWORK_SCALE_FACTOR" default="1.0"/>
            <visualProperty name="NETWORK_HEIGHT" default="400.0"/>
            <visualProperty name="NETWORK_WIDTH" default="550.0"/>
            <visualProperty name="NETWORK_SIZE" default="550.0"/>
            <visualProperty name="NETWORK_TITLE" default=""/>
            <visualProperty name="NETWORK_EDGE_SELECTION" default="true"/>
            <visualProperty name="NETWORK_CENTER_Z_LOCATION" default="0.0"/>
        </network>
        <node>
            <dependency name="nodeCustomGraphicsSizeSync" value="true"/>
            <dependency name="nodeSizeLocked" value="true"/>
            <visualProperty name="NODE_Y_LOCATION" default="0.0"/>
            <visualProperty name="COMPOUND_NODE_PADDING" default="10.0"/>
            <visualProperty name="NODE_CUSTOMGRAPHICS_5" default="org.cytoscape.ding.customgraphics.NullCustomGraphics,0,[ Remove Graphics ],"/>
            <visualProperty name="COMPOUND_NODE_SHAPE" default="ROUND_RECTANGLE"/>
            <visualProperty name="NODE_CUSTOMPAINT_9" default="DefaultVisualizableVisualProperty(id=NODE_CUSTOMPAINT_9, name=Node Custom Paint 9)"/>
            <visualProperty name="NODE_CUSTOMGRAPHICS_POSITION_3" default="C,C,c,0.00,0.00"/>
            <visualProperty name="NODE_PAINT" default="#787878"/>
            <visualProperty name="NODE_CUSTOMGRAPHICS_SIZE_9" default="50.0"/>
            <visualProperty name="NODE_CUSTOMGRAPHICS_SIZE_1" default="50.0"/>
            <visualProperty name="NODE_BORDER_PAINT" default="#919191">
                <continuousMapping attributeType="float" attributeName="GSE55200_P.Value">
                    <continuousMappingPoint lesserValue="#000000" greaterValue="#00CC00" equalValue="#00CC00" attrValue="0.0"/>
                    <continuousMappingPoint lesserValue="#00CC00" greaterValue="#999999" equalValue="#00CC00" attrValue="0.05000000074505806"/>
                </continuousMapping>
            </visualProperty>
            <visualProperty name="NODE_CUSTOMGRAPHICS_1" default="org.cytoscape.ding.customgraphics.NullCustomGraphics,0,[ Remove Graphics ],"/>
            <visualProperty name="NODE_CUSTOMGRAPHICS_8" default="org.cytoscape.ding.customgraphics.NullCustomGraphics,0,[ Remove Graphics ],"/>
            <visualProperty name="NODE_TRANSPARENCY" default="255"/>
            <visualProperty name="NODE_CUSTOMGRAPHICS_SIZE_2" default="50.0"/>
            <visualProperty name="NODE_LABEL_POSITION" default="C,C,c,0.00,0.00"/>
            <visualProperty name="NODE_Z_LOCATION" default="0.0"/>
            <visualProperty name="NODE_CUSTOMPAINT_6" default="DefaultVisualizableVisualProperty(id=NODE_CUSTOMPAINT_6, name=Node Custom Paint 6)"/>
            <visualProperty name="NODE_CUSTOMGRAPHICS_POSITION_1" default="C,C,c,0.00,0.00"/>
            <visualProperty name="NODE_DEPTH" default="0.0"/>
            <visualProperty name="NODE_CUSTOMPAINT_2" default="DefaultVisualizableVisualProperty(id=NODE_CUSTOMPAINT_2, name=Node Custom Paint 2)"/>
            <visualProperty name="NODE_CUSTOMGRAPHICS_SIZE_7" default="50.0"/>
            <visualProperty name="NODE_X_LOCATION" default="0.0"/>
            <visualProperty name="NODE_LABEL_FONT_FACE" default="SansSerif.plain,plain,12"/>
            <visualProperty name="NODE_CUSTOMGRAPHICS_9" default="org.cytoscape.ding.customgraphics.NullCustomGraphics,0,[ Remove Graphics ],"/>
            <visualProperty name="NODE_BORDER_TRANSPARENCY" default="255"/>
            <visualProperty name="NODE_CUSTOMGRAPHICS_POSITION_2" default="C,C,c,0.00,0.00"/>
            <visualProperty name="NODE_CUSTOMGRAPHICS_6" default="org.cytoscape.ding.customgraphics.NullCustomGraphics,0,[ Remove Graphics ],"/>
            <visualProperty name="NODE_CUSTOMGRAPHICS_POSITION_6" default="C,C,c,0.00,0.00"/>
            <visualProperty name="NODE_CUSTOMPAINT_7" default="DefaultVisualizableVisualProperty(id=NODE_CUSTOMPAINT_7, name=Node Custom Paint 7)"/>
            <visualProperty name="NODE_LABEL_WIDTH" default="200.0"/>
            <visualProperty name="NODE_SELECTED_PAINT" default="#FF0066"/>
            <visualProperty name="NODE_FILL_COLOR" default="#CCCCCC">
                <continuousMapping attributeType="float" attributeName="GSE55200">
                    <continuousMappingPoint lesserValue="#0066FF" greaterValue="#0066FF" equalValue="#0066FF" attrValue="-0.5849625"/>
                    <continuousMappingPoint lesserValue="#FFFFFF" greaterValue="#FFFFFF" equalValue="#FFFFFF" attrValue="0.0"/>
                    <continuousMappingPoint lesserValue="#FF0066" greaterValue="#FF0066" equalValue="#FF0066" attrValue="0.5849625"/>
                </continuousMapping>
            </visualProperty>
            <visualProperty name="NODE_CUSTOMGRAPHICS_2" default="org.cytoscape.ding.customgraphics.NullCustomGraphics,0,[ Remove Graphics ],"/>
            <visualProperty name="NODE_CUSTOMGRAPHICS_POSITION_4" default="C,C,c,0.00,0.00"/>
            <visualProperty name="NODE_TOOLTIP" default=""/>
            <visualProperty name="NODE_LABEL_TRANSPARENCY" default="255"/>
            <visualProperty name="NODE_WIDTH" default="50.0"/>
            <visualProperty name="NODE_CUSTOMGRAPHICS_POSITION_7" default="C,C,c,0.00,0.00"/>
            <visualProperty name="NODE_SHAPE" default="ELLIPSE">
                <discreteMapping attributeType="string" attributeName="NodeType">
                    <discreteMappingEntry value="TRIANGLE" attributeValue="Drugs"/>
                    <discreteMappingEntry value="HEXAGON" attributeValue="Metabolite"/>
                    <discreteMappingEntry value="DIAMOND" attributeValue="Process"/>
                    <discreteMappingEntry value="ELLIPSE" attributeValue="Protein"/>
                </discreteMapping>
            </visualProperty>
            <visualProperty name="NODE_CUSTOMPAINT_5" default="DefaultVisualizableVisualProperty(id=NODE_CUSTOMPAINT_5, name=Node Custom Paint 5)"/>
            <visualProperty name="NODE_CUSTOMGRAPHICS_POSITION_9" default="C,C,c,0.00,0.00"/>
            <visualProperty name="NODE_CUSTOMGRAPHICS_4" default="org.cytoscape.ding.customgraphics.NullCustomGraphics,0,[ Remove Graphics ],"/>
            <visualProperty name="NODE_CUSTOMGRAPHICS_7" default="org.cytoscape.ding.customgraphics.NullCustomGraphics,0,[ Remove Graphics ],"/>
            <visualProperty name="NODE_CUSTOMGRAPHICS_3" default="org.cytoscape.ding.customgraphics.NullCustomGraphics,0,[ Remove Graphics ],"/>
            <visualProperty name="NODE_CUSTOMPAINT_3" default="DefaultVisualizableVisualProperty(id=NODE_CUSTOMPAINT_3, name=Node Custom Paint 3)"/>
            <visualProperty name="NODE_HEIGHT" default="50.0"/>
            <visualProperty name="NODE_SIZE" default="65.0"/>
            <visualProperty name="NODE_CUSTOMPAINT_1" default="DefaultVisualizableVisualProperty(id=NODE_CUSTOMPAINT_1, name=Node Custom Paint 1)"/>
            <visualProperty name="NODE_CUSTOMPAINT_8" default="DefaultVisualizableVisualProperty(id=NODE_CUSTOMPAINT_8, name=Node Custom Paint 8)"/>
            <visualProperty name="NODE_CUSTOMGRAPHICS_POSITION_8" default="C,C,c,0.00,0.00"/>
            <visualProperty name="NODE_SELECTED" default="false"/>
            <visualProperty name="NODE_CUSTOMGRAPHICS_SIZE_8" default="50.0"/>
            <visualProperty name="NODE_LABEL_COLOR" default="#000000"/>
            <visualProperty name="NODE_BORDER_STROKE" default="SOLID"/>
            <visualProperty name="NODE_CUSTOMGRAPHICS_SIZE_5" default="50.0"/>
            <visualProperty name="NODE_CUSTOMGRAPHICS_SIZE_4" default="50.0"/>
            <visualProperty name="NODE_VISIBLE" default="true"/>
            <visualProperty name="NODE_BORDER_WIDTH" default="7.0">
                <continuousMapping attributeType="float" attributeName="GSE55200_P.Value">
                    <continuousMappingPoint lesserValue="1.0" greaterValue="12.0" equalValue="12.0" attrValue="0.0"/>
                    <continuousMappingPoint lesserValue="8.0" greaterValue="8.0" equalValue="8.0" attrValue="0.05000000074505806"/>
                    <continuousMappingPoint lesserValue="5.0" greaterValue="5.0" equalValue="5.0" attrValue="0.054999999701976776"/>
                    <continuousMappingPoint lesserValue="5.0" greaterValue="1.0" equalValue="5.0" attrValue="1.0"/>
                </continuousMapping>
            </visualProperty>
            <visualProperty name="NODE_LABEL_FONT_SIZE" default="23"/>
            <visualProperty name="NODE_CUSTOMGRAPHICS_SIZE_6" default="50.0"/>
            <visualProperty name="NODE_NESTED_NETWORK_IMAGE_VISIBLE" default="true"/>
            <visualProperty name="NODE_LABEL" default="">
                <passthroughMapping attributeType="string" attributeName="name"/>
            </visualProperty>
            <visualProperty name="NODE_CUSTOMPAINT_4" default="DefaultVisualizableVisualProperty(id=NODE_CUSTOMPAINT_4, name=Node Custom Paint 4)"/>
            <visualProperty name="NODE_CUSTOMGRAPHICS_SIZE_3" default="50.0"/>
            <visualProperty name="NODE_CUSTOMGRAPHICS_POSITION_5" default="C,C,c,0.00,0.00"/>
        </node>
        <edge>
            <dependency name="arrowColorMatchesEdge" value="true"/>
            <visualProperty name="EDGE_SELECTED" default="false"/>
            <visualProperty name="EDGE_SOURCE_ARROW_UNSELECTED_PAINT" default="#000000"/>
            <visualProperty name="EDGE_UNSELECTED_PAINT" default="#CCCCCC">
                <discreteMapping attributeType="string" attributeName="interaction">
                    <discreteMappingEntry value="#FF6666" attributeValue="inhibits"/>
                </discreteMapping>
            </visualProperty>
            <visualProperty name="EDGE_TOOLTIP" default=""/>
            <visualProperty name="EDGE_SOURCE_ARROW_SELECTED_PAINT" default="#FFFF00"/>
            <visualProperty name="EDGE_LABEL_TRANSPARENCY" default="255"/>
            <visualProperty name="EDGE_LABEL_FONT_FACE" default="SansSerif.plain,plain,12"/>
            <visualProperty name="EDGE_TARGET_ARROW_SHAPE" default="DELTA">
                <discreteMapping attributeType="string" attributeName="interaction">
                    <discreteMappingEntry value="T" attributeValue="inhibits"/>
                </discreteMapping>
            </visualProperty>
            <visualProperty name="EDGE_LABEL_FONT_SIZE" default="18"/>
            <visualProperty name="EDGE_TARGET_ARROW_SIZE" default="6.0"/>
            <visualProperty name="EDGE_VISIBLE" default="true"/>
            <visualProperty name="EDGE_WIDTH" default="7.5"/>
            <visualProperty name="EDGE_TRANSPARENCY" default="255"/>
            <visualProperty name="EDGE_LABEL_WIDTH" default="200.0"/>
            <visualProperty name="EDGE_LABEL_COLOR" default="#3399FF"/>
            <visualProperty name="EDGE_STROKE_UNSELECTED_PAINT" default="#969696"/>
            <visualProperty name="EDGE_PAINT" default="#808080"/>
            <visualProperty name="EDGE_CURVED" default="true"/>
            <visualProperty name="EDGE_SOURCE_ARROW_SIZE" default="6.0"/>
            <visualProperty name="EDGE_BEND" default=""/>
            <visualProperty name="EDGE_STROKE_SELECTED_PAINT" default="#FF0000"/>
            <visualProperty name="EDGE_SOURCE_ARROW_SHAPE" default="NONE"/>
            <visualProperty name="EDGE_LABEL" default=""/>
            <visualProperty name="EDGE_SELECTED_PAINT" default="#FF0000"/>
            <visualProperty name="EDGE_LINE_TYPE" default="SOLID"/>
            <visualProperty name="EDGE_TARGET_ARROW_SELECTED_PAINT" default="#FFFF00"/>
            <visualProperty name="EDGE_TARGET_ARROW_UNSELECTED_PAINT" default="#333333"/>
        </edge>
    </visualStyle>
    <visualStyle name="MetFlexBioSB2018">
        <network>
            <visualProperty name="NETWORK_CENTER_X_LOCATION" default="0.0"/>
            <visualProperty name="NETWORK_CENTER_Y_LOCATION" default="0.0"/>
            <visualProperty name="NETWORK_NODE_SELECTION" default="true"/>
            <visualProperty name="NETWORK_DEPTH" default="0.0"/>
            <visualProperty name="NETWORK_BACKGROUND_PAINT" default="#FFFFFF"/>
            <visualProperty name="NETWORK_SCALE_FACTOR" default="1.0"/>
            <visualProperty name="NETWORK_HEIGHT" default="400.0"/>
            <visualProperty name="NETWORK_WIDTH" default="550.0"/>
            <visualProperty name="NETWORK_SIZE" default="550.0"/>
            <visualProperty name="NETWORK_TITLE" default=""/>
            <visualProperty name="NETWORK_EDGE_SELECTION" default="true"/>
            <visualProperty name="NETWORK_CENTER_Z_LOCATION" default="0.0"/>
        </network>
        <node>
            <dependency name="nodeCustomGraphicsSizeSync" value="true"/>
            <dependency name="nodeSizeLocked" value="true"/>
            <visualProperty name="NODE_Y_LOCATION" default="0.0"/>
            <visualProperty name="COMPOUND_NODE_PADDING" default="10.0"/>
            <visualProperty name="NODE_CUSTOMGRAPHICS_5" default="org.cytoscape.ding.customgraphics.NullCustomGraphics,0,[ Remove Graphics ],"/>
            <visualProperty name="COMPOUND_NODE_SHAPE" default="ROUND_RECTANGLE"/>
            <visualProperty name="NODE_CUSTOMPAINT_9" default="DefaultVisualizableVisualProperty(id=NODE_CUSTOMPAINT_9, name=Node Custom Paint 9)"/>
            <visualProperty name="NODE_CUSTOMGRAPHICS_POSITION_3" default="C,C,c,0.00,0.00"/>
            <visualProperty name="NODE_PAINT" default="#787878"/>
            <visualProperty name="NODE_CUSTOMGRAPHICS_SIZE_9" default="50.0"/>
            <visualProperty name="NODE_CUSTOMGRAPHICS_SIZE_1" default="50.0"/>
            <visualProperty name="NODE_BORDER_PAINT" default="#919191"/>
            <visualProperty name="NODE_CUSTOMGRAPHICS_1" default="org.cytoscape.ding.customgraphics.NullCustomGraphics,0,[ Remove Graphics ],"/>
            <visualProperty name="NODE_CUSTOMGRAPHICS_8" default="org.cytoscape.ding.customgraphics.NullCustomGraphics,0,[ Remove Graphics ],"/>
            <visualProperty name="NODE_TRANSPARENCY" default="255"/>
            <visualProperty name="NODE_CUSTOMGRAPHICS_SIZE_2" default="50.0"/>
            <visualProperty name="NODE_LABEL_POSITION" default="C,C,c,0.00,0.00"/>
            <visualProperty name="NODE_Z_LOCATION" default="0.0"/>
            <visualProperty name="NODE_CUSTOMPAINT_6" default="DefaultVisualizableVisualProperty(id=NODE_CUSTOMPAINT_6, name=Node Custom Paint 6)"/>
            <visualProperty name="NODE_CUSTOMGRAPHICS_POSITION_1" default="C,C,c,0.00,0.00"/>
            <visualProperty name="NODE_DEPTH" default="0.0"/>
            <visualProperty name="NODE_CUSTOMPAINT_2" default="DefaultVisualizableVisualProperty(id=NODE_CUSTOMPAINT_2, name=Node Custom Paint 2)"/>
            <visualProperty name="NODE_CUSTOMGRAPHICS_SIZE_7" default="50.0"/>
            <visualProperty name="NODE_X_LOCATION" default="0.0"/>
            <visualProperty name="NODE_LABEL_FONT_FACE" default="Arial Bold,plain,12"/>
            <visualProperty name="NODE_CUSTOMGRAPHICS_9" default="org.cytoscape.ding.customgraphics.NullCustomGraphics,0,[ Remove Graphics ],"/>
            <visualProperty name="NODE_BORDER_TRANSPARENCY" default="255"/>
            <visualProperty name="NODE_CUSTOMGRAPHICS_POSITION_2" default="C,C,c,0.00,0.00"/>
            <visualProperty name="NODE_CUSTOMGRAPHICS_6" default="org.cytoscape.ding.customgraphics.NullCustomGraphics,0,[ Remove Graphics ],"/>
            <visualProperty name="NODE_CUSTOMGRAPHICS_POSITION_6" default="C,C,c,0.00,0.00"/>
            <visualProperty name="NODE_CUSTOMPAINT_7" default="DefaultVisualizableVisualProperty(id=NODE_CUSTOMPAINT_7, name=Node Custom Paint 7)"/>
            <visualProperty name="NODE_LABEL_WIDTH" default="200.0"/>
            <visualProperty name="NODE_SELECTED_PAINT" default="#FF0066"/>
            <visualProperty name="NODE_FILL_COLOR" default="#FFFFFF">
                <discreteMapping attributeType="string" attributeName="Category">
                    <discreteMappingEntry value="#FF99FF" attributeValue="Regulators"/>
                    <discreteMappingEntry value="#99FFFF" attributeValue="TCA"/>
                    <discreteMappingEntry value="#FFCC99" attributeValue="FAOx"/>
                    <discreteMappingEntry value="#99FF99" attributeValue="Glycolysis"/>
                    <discreteMappingEntry value="#FFFF99" attributeValue="FASynth"/>
                </discreteMapping>
            </visualProperty>
            <visualProperty name="NODE_CUSTOMGRAPHICS_2" default="org.cytoscape.ding.customgraphics.NullCustomGraphics,0,[ Remove Graphics ],"/>
            <visualProperty name="NODE_CUSTOMGRAPHICS_POSITION_4" default="C,C,c,0.00,0.00"/>
            <visualProperty name="NODE_TOOLTIP" default=""/>
            <visualProperty name="NODE_LABEL_TRANSPARENCY" default="255"/>
            <visualProperty name="NODE_WIDTH" default="50.0"/>
            <visualProperty name="NODE_CUSTOMGRAPHICS_POSITION_7" default="C,C,c,0.00,0.00"/>
            <visualProperty name="NODE_SHAPE" default="ELLIPSE">
                <discreteMapping attributeType="string" attributeName="NodeType">
                    <discreteMappingEntry value="TRIANGLE" attributeValue="Drugs"/>
                    <discreteMappingEntry value="HEXAGON" attributeValue="Metabolite"/>
                    <discreteMappingEntry value="DIAMOND" attributeValue="Process"/>
                    <discreteMappingEntry value="ELLIPSE" attributeValue="Protein"/>
                </discreteMapping>
            </visualProperty>
            <visualProperty name="NODE_CUSTOMPAINT_5" default="DefaultVisualizableVisualProperty(id=NODE_CUSTOMPAINT_5, name=Node Custom Paint 5)"/>
            <visualProperty name="NODE_CUSTOMGRAPHICS_POSITION_9" default="C,C,c,0.00,0.00"/>
            <visualProperty name="NODE_CUSTOMGRAPHICS_4" default="org.cytoscape.ding.customgraphics.NullCustomGraphics,0,[ Remove Graphics ],"/>
            <visualProperty name="NODE_CUSTOMGRAPHICS_7" default="org.cytoscape.ding.customgraphics.NullCustomGraphics,0,[ Remove Graphics ],"/>
            <visualProperty name="NODE_CUSTOMGRAPHICS_3" default="org.cytoscape.ding.customgraphics.NullCustomGraphics,0,[ Remove Graphics ],"/>
            <visualProperty name="NODE_CUSTOMPAINT_3" default="DefaultVisualizableVisualProperty(id=NODE_CUSTOMPAINT_3, name=Node Custom Paint 3)"/>
            <visualProperty name="NODE_HEIGHT" default="50.0"/>
            <visualProperty name="NODE_SIZE" default="65.0"/>
            <visualProperty name="NODE_CUSTOMPAINT_1" default="DefaultVisualizableVisualProperty(id=NODE_CUSTOMPAINT_1, name=Node Custom Paint 1)"/>
            <visualProperty name="NODE_CUSTOMPAINT_8" default="DefaultVisualizableVisualProperty(id=NODE_CUSTOMPAINT_8, name=Node Custom Paint 8)"/>
            <visualProperty name="NODE_CUSTOMGRAPHICS_POSITION_8" default="C,C,c,0.00,0.00"/>
            <visualProperty name="NODE_SELECTED" default="false"/>
            <visualProperty name="NODE_CUSTOMGRAPHICS_SIZE_8" default="50.0"/>
            <visualProperty name="NODE_LABEL_COLOR" default="#000000"/>
            <visualProperty name="NODE_BORDER_STROKE" default="SOLID"/>
            <visualProperty name="NODE_CUSTOMGRAPHICS_SIZE_5" default="50.0"/>
            <visualProperty name="NODE_CUSTOMGRAPHICS_SIZE_4" default="50.0"/>
            <visualProperty name="NODE_VISIBLE" default="true"/>
            <visualProperty name="NODE_BORDER_WIDTH" default="7.0"/>
            <visualProperty name="NODE_LABEL_FONT_SIZE" default="22"/>
            <visualProperty name="NODE_CUSTOMGRAPHICS_SIZE_6" default="50.0"/>
            <visualProperty name="NODE_NESTED_NETWORK_IMAGE_VISIBLE" default="true"/>
            <visualProperty name="NODE_LABEL" default="">
                <passthroughMapping attributeType="string" attributeName="name"/>
            </visualProperty>
            <visualProperty name="NODE_CUSTOMPAINT_4" default="DefaultVisualizableVisualProperty(id=NODE_CUSTOMPAINT_4, name=Node Custom Paint 4)"/>
            <visualProperty name="NODE_CUSTOMGRAPHICS_SIZE_3" default="50.0"/>
            <visualProperty name="NODE_CUSTOMGRAPHICS_POSITION_5" default="C,C,c,0.00,0.00"/>
        </node>
        <edge>
            <dependency name="arrowColorMatchesEdge" value="true"/>
            <visualProperty name="EDGE_SELECTED" default="false"/>
            <visualProperty name="EDGE_SOURCE_ARROW_UNSELECTED_PAINT" default="#000000"/>
            <visualProperty name="EDGE_UNSELECTED_PAINT" default="#CCCCCC">
                <discreteMapping attributeType="string" attributeName="interaction">
                    <discreteMappingEntry value="#FF6666" attributeValue="inhibits"/>
                </discreteMapping>
            </visualProperty>
            <visualProperty name="EDGE_TOOLTIP" default=""/>
            <visualProperty name="EDGE_SOURCE_ARROW_SELECTED_PAINT" default="#FFFF00"/>
            <visualProperty name="EDGE_LABEL_TRANSPARENCY" default="255"/>
            <visualProperty name="EDGE_LABEL_FONT_FACE" default="SansSerif.plain,plain,12"/>
            <visualProperty name="EDGE_TARGET_ARROW_SHAPE" default="DELTA">
                <discreteMapping attributeType="string" attributeName="interaction">
                    <discreteMappingEntry value="T" attributeValue="inhibits"/>
                </discreteMapping>
            </visualProperty>
            <visualProperty name="EDGE_LABEL_FONT_SIZE" default="18"/>
            <visualProperty name="EDGE_TARGET_ARROW_SIZE" default="12.0"/>
            <visualProperty name="EDGE_VISIBLE" default="true"/>
            <visualProperty name="EDGE_WIDTH" default="7.5"/>
            <visualProperty name="EDGE_TRANSPARENCY" default="255"/>
            <visualProperty name="EDGE_LABEL_WIDTH" default="200.0"/>
            <visualProperty name="EDGE_LABEL_COLOR" default="#3399FF"/>
            <visualProperty name="EDGE_STROKE_UNSELECTED_PAINT" default="#969696"/>
            <visualProperty name="EDGE_PAINT" default="#808080"/>
            <visualProperty name="EDGE_CURVED" default="true"/>
            <visualProperty name="EDGE_SOURCE_ARROW_SIZE" default="6.0"/>
            <visualProperty name="EDGE_BEND" default=""/>
            <visualProperty name="EDGE_STROKE_SELECTED_PAINT" default="#FF0000"/>
            <visualProperty name="EDGE_SOURCE_ARROW_SHAPE" default="NONE"/>
            <visualProperty name="EDGE_LABEL" default=""/>
            <visualProperty name="EDGE_SELECTED_PAINT" default="#FF0000"/>
            <visualProperty name="EDGE_LINE_TYPE" default="SOLID"/>
            <visualProperty name="EDGE_TARGET_ARROW_SELECTED_PAINT" default="#FFFF00"/>
            <visualProperty name="EDGE_TARGET_ARROW_UNSELECTED_PAINT" default="#333333"/>
        </edge>
    </visualStyle>
</vizmap>
