# Supplementary material
Source: publisher figshare collection journal article supplement (https://springernature.figshare.com/ndownloader/files/17562839)
Supplement: Supplementary file 1 [file 17562839 › CytoscapeSession-2018_09_26-18_42/tables/484-Network+of+Metabolic+Flexibility+%2D+Colour+Coded+by+Pathways/HIDDEN-org.cytoscape.model.CyNode-484+hidden+node.cytable]

"CyCSV-Version","1"
"SUID"
"java.lang.Long"
""
"484 hidden node",""
