# Supplementary material
Source: publisher figshare collection journal article supplement (https://springernature.figshare.com/ndownloader/files/17562839)
Supplement: Supplementary file 1 [file 17562839 › CytoscapeSession-2018_09_26-18_42/tables/484-Network+of+Metabolic+Flexibility+%2D+Colour+Coded+by+Pathways/LOCAL_ATTRS-org.cytoscape.model.CyEdge-Network+of+Metabolic+Flexibility+%2D+Colour+Coded+by+Pathways+root+default++edge.cytable]

CyCSV-Version	1
SUID	abstraction	event	interaction	name	selected
java.lang.Long	java.lang.String	java.lang.String	java.lang.String	java.lang.String	java.lang.Boolean
	mutable	mutable
Network of Metabolic Flexibility - Colour Coded by Pathways root default edge
653					false
652					false
651					false
650					false
649	direct				false
648	direct				false
647	direct				false
646	direct				false
645	direct				false
644	direct				false
643	direct				false
642	direct				false
641					false
640	direct				false
639	direct				false
638	direct	allosteric inhibition			false
637	direct	allosteric inhibition			false
636	direct	allosteric inhibition			false
635	direct	allosteric inhibition			false
634	direct				false
633	direct				false
632	direct				false
631	direct				false
630	direct				false
629	direct				false
628	direct				false
627	direct				false
626	direct				false
625	direct	allosteric activation			false
624	direct	allosteric activation			false
623	direct	allosteric activation			false
622	direct	allosteric activation			false
621	direct				false
620	direct				false
619	direct	allosteric activation			false
618	direct	allosteric activation			false
617	direct	allosteric activation			false
616	direct	allosteric activation			false
615	direct				false
614	direct				false
613	direct	allosteric inhibition			false
612	direct				false
611	direct				false
610	direct				false
609	direct				false
608	direct				false
607	direct				false
606					false
605					false
604	direct				false
603	direct				false
602	direct				false
601	direct				false
600	direct				false
598	direct				false
597	direct	phosphorylation			false
596	direct	phosphorylation			false
595	indirect	transcriptional activation			false
594	direct				false
593	direct				false
592	direct				false
591	direct				false
590	direct				false
589	direct				false
588	direct				false
587	direct	phosphorylation			false
586	direct	phosphorylation			false
585	direct	phosphorylation			false
584	direct				false
583	direct				false
582					false
581					false
580					false
579					false
578					false
577					false
576					false
575					false
574					false
573					false
599	direct	allosteric inhibtion			false
