# Supplementary material
Source: publisher figshare collection journal article supplement (https://springernature.figshare.com/ndownloader/files/17562839)
Supplement: Supplementary file 1 [file 17562839 › CytoscapeSession-2018_09_26-18_42/tables/484-Network+of+Metabolic+Flexibility+%2D+Colour+Coded+by+Pathways/LOCAL_ATTRS-org.cytoscape.model.CyNetwork-Network+of+Metabolic+Flexibility+%2D+Colour+Coded+by+Pathways+root+default++network.cytable]

"CyCSV-Version","1"
"SUID","name","NormalizedSumInformationLoss","selected","SumInformationLoss"
"java.lang.Long","java.lang.String","java.lang.Double","java.lang.Boolean","java.lang.Double"
"","","mutable","","mutable"
"Network of Metabolic Flexibility - Colour Coded by Pathways root default  network",""
"484","Network of Metabolic Flexibility - Colour Coded by Pathways",,"false",
"500","",,"false",
