# Supplementary material
Source: publisher figshare collection journal article supplement (https://springernature.figshare.com/ndownloader/files/17562839)
Supplement: Supplementary file 1 [file 17562839 › CytoscapeSession-2018_09_26-18_42/tables/484-Network+of+Metabolic+Flexibility+%2D+Colour+Coded+by+Pathways/LOCAL_ATTRS-org.cytoscape.model.CyNode-Network+of+Metabolic+Flexibility+%2D+Colour+Coded+by+Pathways+root+default++node.cytable]

CyCSV-Version	1
SUID	Category	ENSG	Localisation	name	NodeType	selected
java.lang.Long	java.lang.String	java.lang.String	java.lang.String	java.lang.String	java.lang.String	java.lang.Boolean
	mutable	mutable	mutable		mutable
Network of Metabolic Flexibility - Colour Coded by Pathways root default node
572	Glycolysis	ENSG00000091140	Mitochondria		Protein	false
571	Glycolysis	ENSG00000150768	Mitochondria		Protein	false
570	Glycolysis	ENSG00000168291	Mitochondria		Protein	false
569	Glycolysis	ENSG00000131828	Mitochondria		Protein	false
568	Glycolysis	ENSG00000067057	Cytosol		Protein	false
567	Glycolysis	ENSG00000152556	Cytosol		Protein	false
566	Glycolysis	ENSG00000141959	Cytosol		Protein	false
565	Glycolysis		Extracellular		Metabolite	false
564	Glycolysis		Cytosol		Process	false
563	Glycolysis	ENSG00000181856	Cytosol		Protein	false
562	Glycolysis	ENSG00000117394	Cytosol		Protein	false
561	Glycolysis		Cytosol		Metabolite	false
560	Glycolysis		Cytosol		Process	false
559	Glycolysis		Cytosol		Protein	false
558	Glycolysis		Cytosol		Metabolite	false
557	Glycolysis		Mitochondria		Process	false
556	Glycolysis		Mitochondria		Protein	false
555	TCA		Mitochondria		Metabolite	false
554	TCA		Mitochondria		Metabolite	false
553	TCA		Mitochondria		Process	false
552	TCA		Mitochondria		Metabolite	false
551	TCA		Mitochondria		Metabolite	false
550	TCA		Mitochondria		Metabolite	false
549	TCA		Mitochondria		Metabolite	false
548	FASynth		Mitochondria		Process	false
547	FASynth	ENSG00000100075	Mitochondria		Protein	false
546	FASynth		Cytosol		Metabolite	false
545	FAOx		Extracellular		Metabolite	false
544	FAOx		Cytosol		Process	false
543	FAOx	ENSG00000135218	Cytosol		Protein	false
542	FAOx		Cytosol		Metabolite	false
541	FAOx		Cytosol		Process	false
540	FASynth		Cytosol		Metabolite	false
539	FASynth		Cytosol		Process	false
538	FASynth	ENSG00000169710	Cytosol		Protein	false
537	FASynth		Cytosol		Process	false
536	FASynth		Cytosol		Metabolite	false
535	Regulators	ENSG00000278540	Cytosol		Protein	false
534	Regulators		Cytosol		Protein	false
533	Glycolysis	ENSG00000004799	Mitochondria		Protein	false
532	Regulators	ENSG00000132170	Cytosol		Protein	false
531	Regulators	ENSG00000132356	Cytosol		Protein	false
530	Regulators	ENSG00000162409	Cytosol		Protein	false
529	Regulators	ENSG00000111725	Cytosol		Protein	false
528	Regulators	ENSG00000131791	Cytosol		Protein	false
527	Regulators	ENSG00000181929	Cytosol		Protein	false
526	Regulators	ENSG00000106617	Cytosol		Protein	false
525	Regulators	ENSG00000115592	Cytosol		Protein	false
524	Glycolysis	ENSG00000067992	Mitochondria		Protein	false
523	Glycolysis	ENSG00000005882	Mitochondria		Protein	false
522	Glycolysis	ENSG00000152256	Mitochondria		Protein	false
521	FASynth	ENSG00000131473	Cytosol		Protein	false
520	FASynth		Cytosol		Process	false
519	FASynth	ENSG00000099194	Cytosol		Protein	false
518	Glycolysis	ENSG00000110435	Mitochondria		Protein	false
517	FAOx	ENSG00000157184	Mitochondria		Protein	false
516	FAOx	ENSG00000110090	Mitochondria		Protein	false
515	FAOx		Mitochondria		Process	false
514	FAOx		Cytosol		Metabolite	false
513	Glycolysis		Mitochondria		Process	false
512	Glycolysis	ENSG00000060762	Mitochondria		Protein	false
511	Glycolysis	ENSG00000143158	Mitochondria		Protein	false
510	Glycolysis		Cytosol		Metabolite	false
