# Supplementary material
Source: publisher figshare collection journal article supplement (https://springernature.figshare.com/ndownloader/files/17562839)
Supplement: Supplementary file 1 [file 17562839 › CytoscapeSession-2018_09_26-18_42/tables/484-Network+of+Metabolic+Flexibility+%2D+Colour+Coded+by+Pathways/SHARED_ATTRS-org.cytoscape.model.CyEdge-Network+of+Metabolic+Flexibility+%2D+Colour+Coded+by+Pathways+root+shared++edge.cytable]

CyCSV-Version	1
SUID	shared interaction	shared name
java.lang.Long	java.lang.String	java.lang.String
Network of Metabolic Flexibility - Colour Coded by Pathways root shared edge
653	forms	DLD (interacts with) PDC
652	forms	DLAT (interacts with) PDC
651	forms	PDHB (interacts with) PDC
650	forms	PDHA1 (interacts with) PDC
649	forms	PFKP (forms) PFK1
648	forms	PFKM (forms) PFK1
647	forms	PFKL (forms) PFK1
646	taken up	Glucose [circulation] (taken up) Glucose Uptake
645	results in	Glucose Uptake (results in) Glucose [cytosol]
644	facilitates	GLUT4 [insulin mediated] (facilitates) Glucose Uptake
643	facilitates	GLUT1 [insulin independent] (facilitates) Glucose Uptake
642	consumed by	Glucose [cytosol] (consumed by) Glycolysis
641	produces	Glycolysis (interacts with) Pyruvate
640	facilitates	PFK1 (facilitates) Glycolysis
639	consumed by	Pyruvate (consumed by) conversionP
638	inhibits	Pyruvate (inhibits) PDK4
637	inhibits	Pyruvate (inhibits) PDK3
636	inhibits	Pyruvate (inhibits) PDK2
635	inhibits	Pyruvate (inhibits) PDK1
634	produces	conversionP (produces) Acetyl-CoA
633	facilitates	PDC (facilitates) conversionP
632	converts into	Acetyl-CoA (converts into) Citrate
631	consumed by	Citrate (consumed by) TCA Cycle
630	transportation	Citrate (transportation) Citrate-transport
629	produces	TCA Cycle (produces) Citrate
628	produces	TCA Cycle (produces) NADH
627	produces	TCA Cycle (produces) ATP
626	consumed by	NAD+ (consumed by) TCA Cycle
625	activates	NADH (activates) PDK4
624	activates	NADH (activates) PDK3
623	activates	NADH (activates) PDK2
622	activates	NADH (activates) PDK1
621	consumed by	AMP (consumed by) TCA Cycle
620	activates	AMP (activates) AMPK
619	activates	ATP (activates) PDK4
618	activates	ATP (activates) PDK3
617	activates	ATP (activates) PDK2
616	activates	ATP (activates) PDK1
615	results in	Citrate-transport (results in) Citrate [cytosol]
614	facilitates	CiC (facilitates) Citrate-transport
613	inhibits	Citrate [cytosol] (inhibits) PFK1
612	consumed by	Citrate [cytosol] (interacts with) Acetyl-CoA Synthesis
611	taken up	Fatty Acids [circulation] (taken up) FA Uptake
610	results in	FA Uptake (results in) Fatty Acids [cytosol]
609	facilitates	CD36 (facilitates) FA Uptake
608	activates	Fatty Acids [cytosol] (activates) PPARg
607	conversionF	Fatty Acids [cytosol] (conversionF) BOxidation
606	produces	BOxidation (interacts with) Acyl-CoA
605	consumed by	Acetyl-CoA [cytosol] (interacts with) conversionC
604	consumed by	Acetyl-CoA [cytosol] (consumed by) Fatty Acid Synthesis
603	produces	Fatty Acid Synthesis (produces) Fatty Acids [cytosol]
602	facilitates	FAS (facilitates) Fatty Acid Synthesis
601	produces	conversionC (produces) Malonyl-CoA
600	consumed by	Malonyl-CoA (interacts with) Fatty Acid Synthesis
598	facilitates	ACC (facilitates) conversionC
597	inhibits	AMPK (inhibits) ACC
596	inhibits	PDK4 (inhibits) PDC
595	activates	PPARg (activates) PDK4
594	forms	AMPKA1 (forms) AMPK
593	forms	AMPKA2 (forms) AMPK
592	forms	AMPKB1 (forms) AMPK
591	forms	AMPKB2 (forms) AMPK
590	forms	AMPKG1 (forms) AMPK
589	forms	AMPKG2 (forms) AMPK
588	forms	AMPKG3 (forms) AMPK
587	inhibits	PDK3 (inhibits) PDC
586	inhibits	PDK2 (inhibits) PDC
585	inhibits	PDK1 (inhibits) PDC
584	facilitates	ACLY (interacts with) Acetyl-CoA Synthesis
583	produces	Acetyl-CoA Synthesis (interacts with) Acetyl-CoA [cytosol]
582	facilitates	ENSG00000099194 (interacts with) Fatty Acid Synthesis
581	forms	PDHX (interacts with) PDC
580	facilitates	ENSG00000110090 (interacts with) CoA Transport
579	facilitates	ENSG00000157184 (interacts with) CoA Transport
578	results in	CoA Transport (interacts with) Acetyl-CoA
577	taken up	Acyl-CoA (interacts with) CoA Transport
576	results in	Pyruvate Transport (interacts with) Pyruvate
575	facilitates	MPC1 (interacts with) Pyruvate Transportfacilitates
574	facilitates	MPC2 (interacts with) Pyruvate Transport
573	taken up	Pyruvate (interacts with) Pyruvate Transport
599	inhibits	Malonyl-CoA (interacts with) ENSG00000110090
