# Supplementary material
Source: publisher figshare collection journal article supplement (https://springernature.figshare.com/ndownloader/files/17562839)
Supplement: Supplementary file 1 [file 17562839 › CytoscapeSession-2018_09_26-18_42/tables/484-Network+of+Metabolic+Flexibility+%2D+Colour+Coded+by+Pathways/SHARED_ATTRS-org.cytoscape.model.CyNetwork-Network+of+Metabolic+Flexibility+%2D+Colour+Coded+by+Pathways+root+shared++network.cytable]

"CyCSV-Version","1"
"SUID","shared name"
"java.lang.Long","java.lang.String"
"",""
"Network of Metabolic Flexibility - Colour Coded by Pathways root shared  network",""
"500","Merged Network_8"
"484",""
