# Supplementary material
Source: publisher figshare collection journal article supplement (https://springernature.figshare.com/ndownloader/files/17562839)
Supplement: Supplementary file 1 [file 17562839 › CytoscapeSession-2018_09_26-18_42/tables/484-Network+of+Metabolic+Flexibility+%2D+Colour+Coded+by+Pathways/SHARED_ATTRS-org.cytoscape.model.CyNode-Network+of+Metabolic+Flexibility+%2D+Colour+Coded+by+Pathways+root+shared++node.cytable]

CyCSV-Version	1
SUID	shared name
java.lang.Long	java.lang.String
Network of Metabolic Flexibility - Colour Coded by Pathways root shared node
572	ENSG00000091140
571	ENSG00000150768
570	ENSG00000168291
569	ENSG00000131828
568	ENSG00000067057
567	ENSG00000152556
566	ENSG00000141959
565	Glucose
564	Glucose Uptake
563	ENSG00000181856
562	ENSG00000117394
561	Glucose
560	Glycolysis
559	PFK1
558	Pyruvate
557	conversionP
556	PDC
555	Acetyl-CoA
554	Citrate
553	TCA Cycle
552	NAD+
551	NADH
550	AMP
549	ATP
548	Citrate Transport
547	ENSG00000100075
546	Citrate
545	Fatty Acids
544	Fatty Acid Uptake
543	ENSG00000135218
542	Fatty Acids
541	Fatty Acid Degradation
540	Acetyl-CoA
539	Fatty Acid Synthesis
538	ENSG00000169710
537	conversionC
536	Malonyl-CoA
535	ENSG00000278540
534	AMPK
533	ENSG00000004799
532	ENSG00000132170
531	ENSG00000132356
530	ENSG00000162409
529	ENSG00000111725
528	ENSG00000131791
527	ENSG00000181929
526	ENSG00000106617
525	ENSG00000115592
524	ENSG00000067992
523	ENSG00000005882
522	ENSG00000152256
521	ENSG00000131473
520	Acetyl-CoA Synthesis
519	ENSG00000099194
518	ENSG00000110435
517	ENSG00000157184
516	ENSG00000110090
515	CoA Transport
514	Acyl-CoA
513	Pyruvate Transport
512	ENSG00000060762
511	ENSG00000143158
510	Pyruvate
