# Supplementary material
Source: publisher figshare collection journal article supplement (https://springernature.figshare.com/ndownloader/files/17562839)
Supplement: Supplementary file 1 [file 17562839 › CytoscapeSession-2018_09_26-18_42/tables/500-Network+of+Metabolic+Flexibility+%2D+Colour+Coded+by+Pathways/LOCAL_ATTRS-org.cytoscape.model.CyEdge-Network+of+Metabolic+Flexibility+%2D+Colour+Coded+by+Pathways+default++edge.cytable]

CyCSV-Version	1
SUID	interaction	name	selected
java.lang.Long	java.lang.String	java.lang.String	java.lang.Boolean
Network of Metabolic Flexibility - Colour Coded by Pathways default edge
573	taken up	Pyruvate (interacts with) Pyruvate Transport	false
574	facilitates	MPC2 (interacts with) Pyruvate Transport	false
575	facilitates	MPC1 (interacts with) Pyruvate Transport	false
576	results in	Pyruvate Transport (interacts with) Pyruvate	false
577	taken up	Acyl-CoA (interacts with) CoA Transport	false
578	results in	CoA Transport (interacts with) Acetyl-CoA	false
579	facilitates	ENSG00000157184 (interacts with) CoA Transport	false
580	facilitates	ENSG00000110090 (interacts with) CoA Transport	false
581	forms	PDHX (interacts with) PDC	false
582	facilitates	ENSG00000099194 (interacts with) Fatty Acid Synthesis	false
583	produces	Acetyl-CoA Synthesis (interacts with) Acetyl-CoA [cytosol]	false
584	facilitates	ACLY (interacts with) Acetyl-CoA Synthesis	false
585	inhibits	PDK1 (inhibits) PDC	false
586	inhibits	PDK2 (inhibits) PDC	false
587	inhibits	PDK3 (inhibits) PDC	false
588	forms	AMPKG3 (forms) AMPK	false
589	forms	AMPKG2 (forms) AMPK	false
590	forms	AMPKG1 (forms) AMPK	false
591	forms	AMPKB2 (forms) AMPK	false
592	forms	AMPKB1 (forms) AMPK	false
593	forms	AMPKA2 (forms) AMPK	false
594	forms	AMPKA1 (forms) AMPK	false
595	activates	PPARg (activates) PDK4	false
596	inhibits	PDK4 (inhibits) PDC	false
597	inhibits	AMPK (inhibits) ACC	false
598	facilitates	ACC (facilitates) conversionC	false
599	inhibits	Malonyl-CoA (interacts with) ENSG00000110090	false
600	consumed by	Malonyl-CoA (interacts with) Fatty Acid Synthesis	false
601	produces	conversionC (produces) Malonyl-CoA	false
602	facilitates	FAS (facilitates) Fatty Acid Synthesis	false
603	produces	Fatty Acid Synthesis (produces) Fatty Acids [cytosol]	false
604	consumed by	Acetyl-CoA [cytosol] (consumed by) Fatty Acid Synthesis	false
605	consumed by	Acetyl-CoA [cytosol] (interacts with) conversionC	false
606	produces	BOxidation (interacts with) Acyl-CoA	false
607	consumed by	Fatty Acids [cytosol] (conversionF) BOxidation	false
608	activates	Fatty Acids [cytosol] (activates) PPARg	false
609	facilitates	CD36 (facilitates) FA Uptake	false
610	results in	FA Uptake (results in) Fatty Acids [cytosol]	false
611	taken up	Fatty Acids [circulation] (taken up) FA Uptake	false
612	consumed by	Citrate [cytosol] (interacts with) Acetyl-CoA Synthesis	false
613	inhibits	Citrate [cytosol] (inhibits) PFK1	false
614	facilitates	CiC (facilitates) Citrate-transport	false
615	results in	Citrate-transport (results in) Citrate [cytosol]	false
616	activates	ATP (activates) PDK1	false
617	activates	ATP (activates) PDK2	false
618	activates	ATP (activates) PDK3	false
619	activates	ATP (activates) PDK4	false
620	activates	AMP (activates) AMPK	false
621	consumed by	AMP (consumed by) TCA Cycle	false
622	activates	NADH (activates) PDK1	false
623	activates	NADH (activates) PDK2	false
624	activates	NADH (activates) PDK3	false
625	activates	NADH (activates) PDK4	false
626	consumed by	NAD+ (consumed by) TCA Cycle	false
627	produces	TCA Cycle (produces) ATP	false
628	produces	TCA Cycle (produces) NADH	false
629	produces	TCA Cycle (produces) Citrate	false
630	transportation	Citrate (transportation) Citrate-transport	false
631	consumed by	Citrate (consumed by) TCA Cycle	false
632	converts into	Acetyl-CoA (converts into) Citrate	false
633	facilitates	PDC (facilitates) conversionP	false
634	produces	conversionP (produces) Acetyl-CoA	false
635	inhibits	Pyruvate (inhibits) PDK1	false
636	inhibits	Pyruvate (inhibits) PDK2	false
637	inhibits	Pyruvate (inhibits) PDK3	false
638	inhibits	Pyruvate (inhibits) PDK4	false
639	consumed by	Pyruvate (consumed by) conversionP	false
640	facilitates	PFK1 (facilitates) Glycolysis	false
641	produces	Glycolysis (interacts with) Pyruvate	false
642	consumed by	Glucose [cytosol] (consumed by) Glycolysis	false
643	facilitates	GLUT1 [insulin independent] (facilitates) Glucose Uptake	false
644	facilitates	GLUT4 [insulin mediated] (facilitates) Glucose Uptake	false
645	results in	Glucose Uptake (results in) Glucose [cytosol]	false
646	taken up	Glucose [circulation] (taken up) Glucose Uptake	false
647	forms	PFKL (forms) PFK1	false
648	forms	PFKM (forms) PFK1	false
649	forms	PFKP (forms) PFK1	false
650	forms	PDHA1 (interacts with) PDC	false
651	forms	PDHB (interacts with) PDC	false
652	forms	DLAT (interacts with) PDC	false
653	forms	DLD (interacts with) PDC	false
