# Supplementary material
Source: publisher figshare collection journal article supplement (https://springernature.figshare.com/ndownloader/files/17562839)
Supplement: Supplementary file 1 [file 17562839 › CytoscapeSession-2018_09_26-18_42/tables/500-Network+of+Metabolic+Flexibility+%2D+Colour+Coded+by+Pathways/LOCAL_ATTRS-org.cytoscape.model.CyNetwork-Network+of+Metabolic+Flexibility+%2D+Colour+Coded+by+Pathways+default++network.cytable]

"CyCSV-Version","1"
"SUID","__Annotations","name","selected"
"java.lang.Long","java.util.List<java.lang.String>","java.lang.String","java.lang.Boolean"
"","mutable","",""
"Network of Metabolic Flexibility - Colour Coded by Pathways default  network",""
"500","","Network of Metabolic Flexibility - Colour Coded by Pathways","false"
