# Supplementary material
Source: publisher figshare collection journal article supplement (https://springernature.figshare.com/ndownloader/files/17562839)
Supplement: Supplementary file 1 [file 17562839 › CytoscapeSession-2018_09_26-18_42/tables/500-Network+of+Metabolic+Flexibility+%2D+Colour+Coded+by+Pathways/LOCAL_ATTRS-org.cytoscape.model.CyNode-Network+of+Metabolic+Flexibility+%2D+Colour+Coded+by+Pathways+default++node.cytable]

CyCSV-Version	1
SUID	name	selected
java.lang.Long	java.lang.String	java.lang.Boolean
Network of Metabolic Flexibility - Colour Coded by Pathways default node
510	Pyruvate	false
511	MPC2	false
512	MPC1	false
513	Pyruvate Transport	false
514	Acyl-CoA	false
515	Acyl Transport	false
516	CPT1A	false
517	CPT2	false
518	PDHX	false
519	SCD	false
520	Acetyl-CoA Synthesis	false
521	ACLY	false
522	PDK1	false
523	PDK2	false
524	PDK3	false
525	PRKAG3	false
526	PRKAG2	false
527	PRKAG1	false
528	PRKAB2	false
529	PRKAB1	false
530	PRKAA2	false
531	PRKAA1	false
532	PPARG	false
533	PDK4	false
534	AMPK	false
535	ACACA	false
536	Malonyl-CoA	false
537	Carboxylation	false
538	FASN	false
539	Fatty Acid Synthesis	false
540	Acetyl-CoA	false
541	Fatty Acid Degradation	false
542	Fatty Acids	false
543	CD36	false
544	Fatty Acid Uptake	false
545	Fatty Acids	false
546	Citrate	false
547	SLC25A1	false
548	Citrate Transport	false
549	ATP	false
550	AMP	false
551	NADH	false
552	NAD+	false
553	TCA Cycle	false
554	Citrate	false
555	Acetyl-CoA	false
556	PDC	false
557	Decarboxylation	false
558	Pyruvate	false
559	PFK1	false
560	Glycolysis	false
561	Glucose	false
562	SLC2A1	false
563	SLC2A4	false
564	Glucose Uptake	false
565	Glucose	false
566	PFKL	false
567	PFKM	false
568	PFKP	false
569	PDHA1	false
570	PDHB	false
571	DLAT	false
572	DLD	false
