# Supplementary material
Source: publisher figshare collection journal article supplement (https://springernature.figshare.com/ndownloader/files/17562839)
Supplement: Supplementary file 1 [file 17562839 › CytoscapeSession-2018_09_26-18_42/tables/654-Expression+%2D+Umbilical+Vein+Endothelial+Cells/LOCAL_ATTRS-org.cytoscape.model.CyEdge-Expression+%2D+Umbilical+Vein+Endothelial+Cells+root+default++edge.cytable]

CyCSV-Version	1
SUID	abstraction	event	interaction	name	selected
java.lang.Long	java.lang.String	java.lang.String	java.lang.String	java.lang.String	java.lang.Boolean
	mutable	mutable
Expression - Umbilical Vein Endothelial Cells root default edge
825					false
824					false
823					false
822					false
821					false
820					false
819					false
818					false
817					false
816					false
815	direct				false
814	direct				false
813	direct	phosphorylation			false
812	direct	phosphorylation			false
811	direct	phosphorylation			false
810	direct				false
809	direct				false
808	direct				false
807	direct				false
806	direct				false
805	direct				false
804	direct				false
803	indirect	transcriptional activation			false
802	direct	phosphorylation			false
801	direct	phosphorylation			false
800	direct				false
799	direct				false
797	direct				false
796	direct				false
795	direct				false
794	direct				false
793					false
792					false
791	direct				false
790	direct				false
789	direct				false
788	direct				false
787	direct				false
786	direct				false
785	direct	allosteric inhibition			false
784	direct				false
783	direct				false
782	direct	allosteric activation			false
781	direct	allosteric activation			false
780	direct	allosteric activation			false
779	direct	allosteric activation			false
778	direct				false
777	direct				false
776	direct	allosteric activation			false
775	direct	allosteric activation			false
774	direct	allosteric activation			false
773	direct	allosteric activation			false
772	direct				false
771	direct				false
770	direct				false
769	direct				false
768	direct				false
767	direct				false
766	direct				false
765	direct				false
764	direct				false
763	direct	allosteric inhibition			false
762	direct	allosteric inhibition			false
761	direct	allosteric inhibition			false
760	direct	allosteric inhibition			false
759	direct				false
758	direct				false
757					false
756	direct				false
755	direct				false
754	direct				false
753	direct				false
752	direct				false
751	direct				false
750	direct				false
749	direct				false
748					false
747					false
746					false
745					false
827					false
826					false
798					false
