# Supplementary material
Source: publisher figshare collection journal article supplement (https://springernature.figshare.com/ndownloader/files/17562839)
Supplement: Supplementary file 1 [file 17562839 › CytoscapeSession-2018_09_26-18_42/tables/654-Expression+%2D+Umbilical+Vein+Endothelial+Cells/LOCAL_ATTRS-org.cytoscape.model.CyNetwork-Expression+%2D+Umbilical+Vein+Endothelial+Cells+root+default++network.cytable]

"CyCSV-Version","1"
"SUID","name","NormalizedSumInformationLoss","selected","SumInformationLoss"
"java.lang.Long","java.lang.String","java.lang.Double","java.lang.Boolean","java.lang.Double"
"","","mutable","","mutable"
"Expression - Umbilical Vein Endothelial Cells root default  network",""
"654","Expression - Umbilical Vein Endothelial Cells",,"false",
"670","",,"false",
