# Supplementary material
Source: publisher figshare collection journal article supplement (https://springernature.figshare.com/ndownloader/files/17562839)
Supplement: Supplementary file 1 [file 17562839 › CytoscapeSession-2018_09_26-18_42/tables/654-Expression+%2D+Umbilical+Vein+Endothelial+Cells/LOCAL_ATTRS-org.cytoscape.model.CyNode-Expression+%2D+Umbilical+Vein+Endothelial+Cells+root+default++node.cytable]

CyCSV-Version	1
SUID	Category	ENSG	Localisation	Log2 TPM	name	NodeType	selected
java.lang.Long	java.lang.String	java.lang.String	java.lang.String	java.lang.Double	java.lang.String	java.lang.String	java.lang.Boolean
	mutable	mutable	mutable	mutable		mutable
Expression - Umbilical Vein Endothelial Cells root default node
742	Glycolysis		Cytosol			Metabolite	false
741	Glycolysis	ENSG00000143158	Mitochondria	5.129283017		Protein	false
740	Glycolysis	ENSG00000060762	Mitochondria	6.266786541		Protein	false
739	Glycolysis		Mitochondria			Process	false
738	FAOx		Cytosol			Metabolite	false
737	FAOx		Mitochondria			Process	false
736	FAOx	ENSG00000110090	Mitochondria	5.426264755		Protein	false
735	FAOx	ENSG00000157184	Mitochondria	3.584962501		Protein	false
734	Glycolysis	ENSG00000110435	Mitochondria	4.459431619		Protein	false
733	FASynth	ENSG00000099194	Cytosol	9.197216693		Protein	false
732	FASynth		Cytosol			Process	false
731	FASynth	ENSG00000131473	Cytosol	6.087462841		Protein	false
730	Glycolysis	ENSG00000152256	Mitochondria	2.321928095		Protein	false
729	Glycolysis	ENSG00000005882	Mitochondria	4.169925001		Protein	false
728	Glycolysis	ENSG00000067992	Mitochondria	2.584962501		Protein	false
727	Regulators	ENSG00000115592	Cytosol	-3.321928095		Protein	false
726	Regulators	ENSG00000106617	Cytosol	4.807354922		Protein	false
725	Regulators	ENSG00000181929	Cytosol	5.209453366		Protein	false
724	Regulators	ENSG00000131791	Cytosol	4.906890596		Protein	false
723	Regulators	ENSG00000111725	Cytosol	4.459431619		Protein	false
722	Regulators	ENSG00000162409	Cytosol	1.584962501		Protein	false
721	Regulators	ENSG00000132356	Cytosol	5.977279923		Protein	false
720	Regulators	ENSG00000132170	Cytosol	6.686500527		Protein	false
719	Glycolysis	ENSG00000004799	Mitochondria	9.079484784		Protein	false
718	Regulators		Cytosol			Protein	false
717	Regulators	ENSG00000278540	Cytosol	3.700439718		Protein	false
716	FASynth		Cytosol			Metabolite	false
715	FASynth		Cytosol			Process	false
714	FASynth	ENSG00000169710	Cytosol	8.857980995		Protein	false
713	FASynth		Cytosol			Process	false
712	FASynth		Cytosol			Metabolite	false
711	FAOx		Cytosol			Process	false
710	FAOx		Cytosol			Metabolite	false
709	FAOx	ENSG00000135218	Cytosol	8.82336724		Protein	false
708	FAOx		Cytosol			Process	false
707	FAOx		Extracellular			Metabolite	false
706	FASynth		Cytosol			Metabolite	false
705	FASynth	ENSG00000100075	Mitochondria	7.348728154		Protein	false
704	FASynth		Mitochondria			Process	false
703	TCA		Mitochondria			Metabolite	false
702	TCA		Mitochondria			Metabolite	false
701	TCA		Mitochondria			Metabolite	false
700	TCA		Mitochondria			Metabolite	false
699	TCA		Mitochondria			Process	false
698	TCA		Mitochondria			Metabolite	false
697	TCA		Mitochondria			Metabolite	false
696	Glycolysis		Mitochondria			Protein	false
695	Glycolysis		Mitochondria			Process	false
694	Glycolysis		Cytosol			Metabolite	false
693	Glycolysis		Cytosol			Protein	false
692	Glycolysis		Cytosol			Process	false
691	Glycolysis		Cytosol			Metabolite	false
690	Glycolysis	ENSG00000117394	Cytoplasm	4.087462841		Protein	false
689	Glycolysis	ENSG00000181856	Cytosol	4.459431619		Protein	false
688	Glycolysis		Cytosol			Process	false
687	Glycolysis		Extracellular			Metabolite	false
686	Glycolysis	ENSG00000141959	Cytosol	6.06608919		Protein	false
685	Glycolysis	ENSG00000152556	Cytosol	4.169925001		Protein	false
684	Glycolysis	ENSG00000067057	Cytosol	5.357552005		Protein	false
683	Glycolysis	ENSG00000131828	Mitochondria	5.554588852		Protein	false
682	Glycolysis	ENSG00000168291	Mitochondria	5.087462841		Protein	false
681	Glycolysis	ENSG00000150768	Mitochondria	4.523561956		Protein	false
680	Glycolysis	ENSG00000091140	Mitochondria	5.357552005		Protein	false
743	Glycolysis	ENSG00000163581	Cytoplasm	0.0		Protein	false
744	Glycolysis	ENSG00000059804	Cytoplasm	6.714245518		Protein	false
