# Supplementary material
Source: publisher figshare collection journal article supplement (https://springernature.figshare.com/ndownloader/files/17562839)
Supplement: Supplementary file 1 [file 17562839 › CytoscapeSession-2018_09_26-18_42/tables/654-Expression+%2D+Umbilical+Vein+Endothelial+Cells/SHARED_ATTRS-org.cytoscape.model.CyEdge-Expression+%2D+Umbilical+Vein+Endothelial+Cells+root+shared++edge.cytable]

CyCSV-Version	1
SUID	shared interaction	shared name
java.lang.Long	java.lang.String	java.lang.String
Expression - Umbilical Vein Endothelial Cells root shared edge
825	taken up	Pyruvate (interacts with) Pyruvate Transport
824	facilitates	MPC2 (interacts with) Pyruvate Transport
823	facilitates	MPC1 (interacts with) Pyruvate Transportfacilitates
822	results in	Pyruvate Transport (interacts with) Pyruvate
821	taken up	Acyl-CoA (interacts with) CoA Transport
820	results in	CoA Transport (interacts with) Acetyl-CoA
819	facilitates	ENSG00000157184 (interacts with) CoA Transport
818	facilitates	ENSG00000110090 (interacts with) CoA Transport
817	forms	PDHX (interacts with) PDC
816	facilitates	ENSG00000099194 (interacts with) Fatty Acid Synthesis
815	produces	Acetyl-CoA Synthesis (interacts with) Acetyl-CoA [cytosol]
814	facilitates	ACLY (interacts with) Acetyl-CoA Synthesis
813	inhibits	PDK1 (inhibits) PDC
812	inhibits	PDK2 (inhibits) PDC
811	inhibits	PDK3 (inhibits) PDC
810	forms	AMPKG3 (forms) AMPK
809	forms	AMPKG2 (forms) AMPK
808	forms	AMPKG1 (forms) AMPK
807	forms	AMPKB2 (forms) AMPK
806	forms	AMPKB1 (forms) AMPK
805	forms	AMPKA2 (forms) AMPK
804	forms	AMPKA1 (forms) AMPK
803	activates	PPARg (activates) PDK4
802	inhibits	PDK4 (inhibits) PDC
801	inhibits	AMPK (inhibits) ACC
800	facilitates	ACC (facilitates) conversionC
799	consumed by	Malonyl-CoA (interacts with) Fatty Acid Synthesis
797	produces	conversionC (produces) Malonyl-CoA
796	facilitates	FAS (facilitates) Fatty Acid Synthesis
795	produces	Fatty Acid Synthesis (produces) Fatty Acids [cytosol]
794	consumed by	Acetyl-CoA [cytosol] (consumed by) Fatty Acid Synthesis
793	consumed by	Acetyl-CoA [cytosol] (interacts with) conversionC
792	produces	BOxidation (interacts with) Acyl-CoA
791	conversionF	Fatty Acids [cytosol] (conversionF) BOxidation
790	activates	Fatty Acids [cytosol] (activates) PPARg
789	facilitates	CD36 (facilitates) FA Uptake
788	results in	FA Uptake (results in) Fatty Acids [cytosol]
787	taken up	Fatty Acids [circulation] (taken up) FA Uptake
786	consumed by	Citrate [cytosol] (interacts with) Acetyl-CoA Synthesis
785	inhibits	Citrate [cytosol] (inhibits) PFK1
784	facilitates	CiC (facilitates) Citrate-transport
783	results in	Citrate-transport (results in) Citrate [cytosol]
782	activates	ATP (activates) PDK1
781	activates	ATP (activates) PDK2
780	activates	ATP (activates) PDK3
779	activates	ATP (activates) PDK4
778	activates	AMP (activates) AMPK
777	consumed by	AMP (consumed by) TCA Cycle
776	activates	NADH (activates) PDK1
775	activates	NADH (activates) PDK2
774	activates	NADH (activates) PDK3
773	activates	NADH (activates) PDK4
772	consumed by	NAD+ (consumed by) TCA Cycle
771	produces	TCA Cycle (produces) ATP
770	produces	TCA Cycle (produces) NADH
769	produces	TCA Cycle (produces) Citrate
768	transportation	Citrate (transportation) Citrate-transport
767	consumed by	Citrate (consumed by) TCA Cycle
766	converts into	Acetyl-CoA (converts into) Citrate
765	facilitates	PDC (facilitates) conversionP
764	produces	conversionP (produces) Acetyl-CoA
763	inhibits	Pyruvate (inhibits) PDK1
762	inhibits	Pyruvate (inhibits) PDK2
761	inhibits	Pyruvate (inhibits) PDK3
760	inhibits	Pyruvate (inhibits) PDK4
759	consumed by	Pyruvate (consumed by) conversionP
758	facilitates	PFK1 (facilitates) Glycolysis
757	produces	Glycolysis (interacts with) Pyruvate
756	consumed by	Glucose [cytosol] (consumed by) Glycolysis
755	facilitates	GLUT1 [insulin independent] (facilitates) Glucose Uptake
754	facilitates	GLUT4 [insulin mediated] (facilitates) Glucose Uptake
753	results in	Glucose Uptake (results in) Glucose [cytosol]
752	taken up	Glucose [circulation] (taken up) Glucose Uptake
751	forms	PFKL (forms) PFK1
750	forms	PFKM (forms) PFK1
749	forms	PFKP (forms) PFK1
748	forms	PDHA1 (interacts with) PDC
747	forms	PDHB (interacts with) PDC
746	forms	DLAT (interacts with) PDC
745	forms	DLD (interacts with) PDC
827	interacts with	ENSG00000059804 (interacts with) Glucose Uptake
826	interacts with	ENSG00000163581 (interacts with) Glucose Uptake
798	inhibits	Malonyl-CoA (interacts with) ENSG00000157184
