# Supplementary material
Source: publisher figshare collection journal article supplement (https://springernature.figshare.com/ndownloader/files/17562839)
Supplement: Supplementary file 1 [file 17562839 › CytoscapeSession-2018_09_26-18_42/tables/654-Expression+%2D+Umbilical+Vein+Endothelial+Cells/SHARED_ATTRS-org.cytoscape.model.CyNetwork-Expression+%2D+Umbilical+Vein+Endothelial+Cells+root+shared++network.cytable]

"CyCSV-Version","1"
"SUID","shared name"
"java.lang.Long","java.lang.String"
"",""
"Expression - Umbilical Vein Endothelial Cells root shared  network",""
"670","Merged Network_11"
"654",""
