# Supplementary material
Source: publisher figshare collection journal article supplement (https://springernature.figshare.com/ndownloader/files/17562839)
Supplement: Supplementary file 1 [file 17562839 › CytoscapeSession-2018_09_26-18_42/tables/654-Expression+%2D+Umbilical+Vein+Endothelial+Cells/SHARED_ATTRS-org.cytoscape.model.CyNode-Expression+%2D+Umbilical+Vein+Endothelial+Cells+root+shared++node.cytable]

CyCSV-Version	1
SUID	endothelial cell of umbilical vein (proliferating)	endothelial cell of umbilical vein (resting)	Log2TPM (endothelial cell of umbilical vein (proliferating))	Log2TPM (endothelial cell of umbilical vein (resting) )	shared name
java.lang.Long	java.lang.Double	java.lang.Double	java.lang.Double	java.lang.Double	java.lang.String
	mutable	mutable	mutable	mutable
Expression - Umbilical Vein Endothelial Cells root shared node
742					Pyruvate
741	21.0	24.0	4.392317423	4.584962501	ENSG00000143158
740	34.0	23.0	5.087462841	4.523561956	ENSG00000060762
739					Pyruvate Transport
738					Acyl-CoA
737					CoA Transport
736	66.0	89.0	6.044394119	6.475733431	ENSG00000110090
735	10.0	11.0	3.321928095	3.459431619	ENSG00000157184
734	23.0	25.0	4.523561956	4.64385619	ENSG00000110435
733	757.0	489.0	9.56414949	8.933690655	ENSG00000099194
732					Acetyl-CoA Synthesis
731	372.0	250.0	8.539158811	7.965784285	ENSG00000131473
730	7.0	7.0	2.807354922	2.807354922	ENSG00000152256
729	5.0	8.0	2.321928095	3.0	ENSG00000005882
728	7.0	10.0	2.807354922	3.321928095	ENSG00000067992
727			2.0		ENSG00000115592
726	12.0	14.0	3.584962501	3.807354922	ENSG00000106617
725	23.0	29.0	4.523561956	4.857980995	ENSG00000181929
724	12.0	18.0	3.584962501	4.169925001	ENSG00000131791
723	11.0	11.0	3.459431619	3.459431619	ENSG00000111725
722	2.0	4.0	1.0	2.0	ENSG00000162409
721	71.0	62.0	6.14974712	5.95419631	ENSG00000132356
720	0.8	1.0	-0.321928095	0.0	ENSG00000132170
719	4.0	16.0	2.0	4.0	ENSG00000004799
718					AMPK
717	74.0	61.0	6.209453366	5.930737338	ENSG00000278540
716					Malonyl-CoA
715					conversionC
714	121.0	51.0	6.918863237	5.672425342	ENSG00000169710
713					Fatty Acid Synthesis
712					Acetyl-CoA
711					Fatty Acid Degradation
710					Fatty Acids
709	0.2	1.0	-2.321928095	0.0	ENSG00000135218
708					Fatty Acid Uptake
707					Fatty Acids
706					Citrate
705	85.0	55.0	6.409390936	5.781359714	ENSG00000100075
704					Citrate Transport
703					ATP
702					AMP
701					NADH
700					NAD+
699					TCA Cycle
698					Citrate
697					Acetyl-CoA
696					PDC
695					conversionP
694					Pyruvate
693					PFK1
692					Glycolysis
691					Glucose
690	22.0	14.0	4.459431619	3.807354922	ENSG00000117394
689	0.2	0.3	-2.321928095	-1.736965594	ENSG00000181856
688					Glucose Uptake
687					Glucose
686	35.0	31.0	5.129283017	4.95419631	ENSG00000141959
685	26.0	37.0	4.700439718	5.209453366	ENSG00000152556
684	139.0	129.0	7.118941073	7.011227255	ENSG00000067057
683	35.0	34.0	5.129283017	5.087462841	ENSG00000131828
682	40.0	40.0	5.321928095	5.321928095	ENSG00000168291
681	35.0	34.0	5.129283017	5.087462841	ENSG00000150768
680	57.0	58.0	5.832890014	5.857980995	ENSG00000091140
743					ENSG00000163581
744	14.0	19.0	3.807354922	4.247927513	ENSG00000059804
