# Supplementary material
Source: publisher figshare collection journal article supplement (https://springernature.figshare.com/ndownloader/files/17562839)
Supplement: Supplementary file 1 [file 17562839 › CytoscapeSession-2018_09_26-18_42/tables/670-Expression+%2D+Umbilical+Vein+Endothelial+Cells/HIDDEN-org.cytoscape.model.CyNetwork-670+hidden+network.cytable]

"CyCSV-Version","1"
"SUID"
"java.lang.Long"
""
"670 hidden network",""
"670"
