# Supplementary material
Source: publisher figshare collection journal article supplement (https://springernature.figshare.com/ndownloader/files/17562839)
Supplement: Supplementary file 1 [file 17562839 › CytoscapeSession-2018_09_26-18_42/tables/670-Expression+%2D+Umbilical+Vein+Endothelial+Cells/HIDDEN-org.cytoscape.model.CyNode-670+hidden+node.cytable]

"CyCSV-Version","1"
"SUID"
"java.lang.Long"
""
"670 hidden node",""
"742"
"741"
"740"
"739"
"738"
"737"
"736"
"735"
"734"
"733"
"732"
"731"
"730"
"729"
"728"
"727"
"726"
"725"
"724"
"723"
"722"
"721"
"720"
"719"
"718"
"717"
"716"
"715"
"714"
"713"
"712"
"711"
"710"
"709"
"708"
"707"
"706"
"705"
"704"
"703"
"702"
"701"
"700"
"699"
"698"
"697"
"696"
"695"
"694"
"693"
"692"
"691"
"690"
"689"
"688"
"687"
"686"
"685"
"684"
"683"
"682"
"681"
"680"
"743"
"744"
