# Supplementary material
Source: publisher figshare collection journal article supplement (https://springernature.figshare.com/ndownloader/files/17562839)
Supplement: Supplementary file 1 [file 17562839 › CytoscapeSession-2018_09_26-18_42/tables/670-Expression+%2D+Umbilical+Vein+Endothelial+Cells/LOCAL_ATTRS-org.cytoscape.model.CyEdge-Expression+%2D+Umbilical+Vein+Endothelial+Cells+default++edge.cytable]

CyCSV-Version	1
SUID	interaction	name	selected
java.lang.Long	java.lang.String	java.lang.String	java.lang.Boolean
Expression - Umbilical Vein Endothelial Cells default edge
745	forms	DLD (interacts with) PDC	false
746	forms	DLAT (interacts with) PDC	false
747	forms	PDHB (interacts with) PDC	false
748	forms	PDHA1 (interacts with) PDC	false
749	forms	PFKP (forms) PFK1	false
750	forms	PFKM (forms) PFK1	false
751	forms	PFKL (forms) PFK1	false
752	taken up	Glucose [circulation] (taken up) Glucose Uptake	false
753	results in	Glucose Uptake (results in) Glucose [cytosol]	false
754	facilitates	GLUT4 [insulin mediated] (facilitates) Glucose Uptake	false
755	facilitates	GLUT1 [insulin independent] (facilitates) Glucose Uptake	false
756	consumed by	Glucose [cytosol] (consumed by) Glycolysis	false
757	produces	Glycolysis (interacts with) Pyruvate	false
758	facilitates	PFK1 (facilitates) Glycolysis	false
759	consumed by	Pyruvate (consumed by) conversionP	false
760	inhibits	Pyruvate (inhibits) PDK4	false
761	inhibits	Pyruvate (inhibits) PDK3	false
762	inhibits	Pyruvate (inhibits) PDK2	false
763	inhibits	Pyruvate (inhibits) PDK1	false
764	produces	conversionP (produces) Acetyl-CoA	false
765	facilitates	PDC (facilitates) conversionP	false
766	converts into	Acetyl-CoA (converts into) Citrate	false
767	consumed by	Citrate (consumed by) TCA Cycle	false
768	transportation	Citrate (transportation) Citrate-transport	false
769	produces	TCA Cycle (produces) Citrate	false
770	produces	TCA Cycle (produces) NADH	false
771	produces	TCA Cycle (produces) ATP	false
772	consumed by	NAD+ (consumed by) TCA Cycle	false
773	activates	NADH (activates) PDK4	false
774	activates	NADH (activates) PDK3	false
775	activates	NADH (activates) PDK2	false
776	activates	NADH (activates) PDK1	false
777	consumed by	AMP (consumed by) TCA Cycle	false
778	activates	AMP (activates) AMPK	false
779	activates	ATP (activates) PDK4	false
780	activates	ATP (activates) PDK3	false
781	activates	ATP (activates) PDK2	false
782	activates	ATP (activates) PDK1	false
783	results in	Citrate-transport (results in) Citrate [cytosol]	false
784	facilitates	CiC (facilitates) Citrate-transport	false
785	inhibits	Citrate [cytosol] (inhibits) PFK1	false
786	consumed by	Citrate [cytosol] (interacts with) Acetyl-CoA Synthesis	false
787	taken up	Fatty Acids [circulation] (taken up) FA Uptake	false
788	results in	FA Uptake (results in) Fatty Acids [cytosol]	false
789	facilitates	CD36 (facilitates) FA Uptake	false
790	activates	Fatty Acids [cytosol] (activates) PPARg	false
791	consumed by	Fatty Acids [cytosol] (conversionF) BOxidation	false
792	produces	BOxidation (interacts with) Acyl-CoA	false
793	consumed by	Acetyl-CoA [cytosol] (interacts with) conversionC	false
794	consumed by	Acetyl-CoA [cytosol] (consumed by) Fatty Acid Synthesis	false
795	produces	Fatty Acid Synthesis (produces) Fatty Acids [cytosol]	false
796	facilitates	FAS (facilitates) Fatty Acid Synthesis	false
797	produces	conversionC (produces) Malonyl-CoA	false
798	inhibits	Malonyl-CoA (interacts with) ENSG00000157184	false
799	consumed by	Malonyl-CoA (interacts with) Fatty Acid Synthesis	false
800	facilitates	ACC (facilitates) conversionC	false
801	inhibits	AMPK (inhibits) ACC	false
802	inhibits	PDK4 (inhibits) PDC	false
803	activates	PPARg (activates) PDK4	false
804	forms	AMPKA1 (forms) AMPK	false
805	forms	AMPKA2 (forms) AMPK	false
806	forms	AMPKB1 (forms) AMPK	false
807	forms	AMPKB2 (forms) AMPK	false
808	forms	AMPKG1 (forms) AMPK	false
809	forms	AMPKG2 (forms) AMPK	false
810	forms	AMPKG3 (forms) AMPK	false
811	inhibits	PDK3 (inhibits) PDC	false
812	inhibits	PDK2 (inhibits) PDC	false
813	inhibits	PDK1 (inhibits) PDC	false
814	facilitates	ACLY (interacts with) Acetyl-CoA Synthesis	false
815	produces	Acetyl-CoA Synthesis (interacts with) Acetyl-CoA [cytosol]	false
816	facilitates	ENSG00000099194 (interacts with) Fatty Acid Synthesis	false
817	forms	PDHX (interacts with) PDC	false
818	facilitates	ENSG00000110090 (interacts with) CoA Transport	false
819	facilitates	ENSG00000157184 (interacts with) CoA Transport	false
820	results in	CoA Transport (interacts with) Acetyl-CoA	false
821	taken up	Acyl-CoA (interacts with) CoA Transport	false
822	results in	Pyruvate Transport (interacts with) Pyruvate	false
823	facilitates	MPC1 (interacts with) Pyruvate Transport	false
824	facilitates	MPC2 (interacts with) Pyruvate Transport	false
825	taken up	Pyruvate (interacts with) Pyruvate Transport	false
826	interacts with	ENSG00000163581 (interacts with) Glucose Uptake	false
827	interacts with	ENSG00000059804 (interacts with) Glucose Uptake	false
