# Supplementary material
Source: publisher figshare collection journal article supplement (https://springernature.figshare.com/ndownloader/files/17562839)
Supplement: Supplementary file 1 [file 17562839 › CytoscapeSession-2018_09_26-18_42/tables/670-Expression+%2D+Umbilical+Vein+Endothelial+Cells/LOCAL_ATTRS-org.cytoscape.model.CyNetwork-Expression+%2D+Umbilical+Vein+Endothelial+Cells+default++network.cytable]

"CyCSV-Version","1"
"SUID","__Annotations","name","selected"
"java.lang.Long","java.util.List<java.lang.String>","java.lang.String","java.lang.Boolean"
"","mutable","",""
"Expression - Umbilical Vein Endothelial Cells default  network",""
"670","","Expression - Umbilical Vein Endothelial Cells","false"
