# Supplementary material
Source: publisher figshare collection journal article supplement (https://springernature.figshare.com/ndownloader/files/17562839)
Supplement: Supplementary file 1 [file 17562839 › CytoscapeSession-2018_09_26-18_42/tables/670-Expression+%2D+Umbilical+Vein+Endothelial+Cells/LOCAL_ATTRS-org.cytoscape.model.CyNode-Expression+%2D+Umbilical+Vein+Endothelial+Cells+default++node.cytable]

CyCSV-Version	1
SUID	name	selected
java.lang.Long	java.lang.String	java.lang.Boolean
Expression - Umbilical Vein Endothelial Cells default node
680	DLD	false
681	DLAT	false
682	PDHB	false
683	PDHA1	false
684	PFKP	false
685	PFKM	false
686	PFKL	false
687	Glucose	false
688	Glucose Uptake	false
689	SLC2A4	false
690	SLC2A1	false
691	Glucose	false
692	Glycolysis	false
693	PFK1	false
694	Pyruvate	false
695	Decarboxylation	false
696	PDC	false
697	Acetyl-CoA	false
698	Citrate	false
699	TCA Cycle	false
700	NAD+	false
701	NADH	false
702	AMP	false
703	ATP	false
704	Citrate Transport	false
705	SLC25A1	false
706	Citrate	false
707	Fatty Acids	false
708	Fatty Acid Uptake	false
709	CD36	false
710	Fatty Acids	false
711	Fatty Acid Degradation	false
712	Acetyl-CoA	false
713	Fatty Acid Synthesis	false
714	FASN	false
715	Carboxylation	false
716	Malonyl-CoA	false
717	ACACA	false
718	AMPK	false
719	PDK4	false
720	PPARG	false
721	PRKAA1	false
722	PRKAA2	false
723	PRKAB1	false
724	PRKAB2	false
725	PRKAG1	false
726	PRKAG2	false
727	PRKAG3	false
728	PDK3	false
729	PDK2	false
730	PDK1	false
731	ACLY	false
732	Acetyl-CoA Synthesis	false
733	SCD	false
734	PDHX	false
735	CPT2	false
736	CPT1A	false
737	Acyl Transport	false
738	Acyl-CoA	false
739	Pyruvate Transport	false
740	MPC1	false
741	MPC2	false
742	Pyruvate	false
743	SLC2A2	false
744	SLC2A3	false
