# Supplementary material
Source: publisher figshare collection journal article supplement (https://springernature.figshare.com/ndownloader/files/17562839)
Supplement: Supplementary file 1 [file 17562839 › CytoscapeSession-2018_09_26-18_42/tables/cytables.xml]

<?xml version="1.0" encoding="UTF-8" standalone="yes"?>
<cyTables>
    <virtualColumns>
        <virtualColumn immutable="false" targetJoinKey="SUID" targetTable="654-Expression+%2D+Umbilical+Vein+Endothelial+Cells/LOCAL_ATTRS-org.cytoscape.model.CyEdge-Expression+%2D+Umbilical+Vein+Endothelial+Cells+root+default++edge.cytable" sourceJoinKey="SUID" sourceTable="654-Expression+%2D+Umbilical+Vein+Endothelial+Cells/SHARED_ATTRS-org.cytoscape.model.CyEdge-Expression+%2D+Umbilical+Vein+Endothelial+Cells+root+shared++edge.cytable" sourceColumn="shared name" name="shared name"/>
        <virtualColumn immutable="false" targetJoinKey="SUID" targetTable="654-Expression+%2D+Umbilical+Vein+Endothelial+Cells/LOCAL_ATTRS-org.cytoscape.model.CyEdge-Expression+%2D+Umbilical+Vein+Endothelial+Cells+root+default++edge.cytable" sourceJoinKey="SUID" sourceTable="654-Expression+%2D+Umbilical+Vein+Endothelial+Cells/SHARED_ATTRS-org.cytoscape.model.CyEdge-Expression+%2D+Umbilical+Vein+Endothelial+Cells+root+shared++edge.cytable" sourceColumn="shared interaction" name="shared interaction"/>
        <virtualColumn immutable="false" targetJoinKey="SUID" targetTable="670-Expression+%2D+Umbilical+Vein+Endothelial+Cells/LOCAL_ATTRS-org.cytoscape.model.CyNetwork-Expression+%2D+Umbilical+Vein+Endothelial+Cells+default++network.cytable" sourceJoinKey="SUID" sourceTable="654-Expression+%2D+Umbilical+Vein+Endothelial+Cells/SHARED_ATTRS-org.cytoscape.model.CyNetwork-Expression+%2D+Umbilical+Vein+Endothelial+Cells+root+shared++network.cytable" sourceColumn="shared name" name="shared name"/>
        <virtualColumn immutable="false" targetJoinKey="SUID" targetTable="670-Expression+%2D+Umbilical+Vein+Endothelial+Cells/LOCAL_ATTRS-org.cytoscape.model.CyNetwork-Expression+%2D+Umbilical+Vein+Endothelial+Cells+default++network.cytable" sourceJoinKey="SUID" sourceTable="654-Expression+%2D+Umbilical+Vein+Endothelial+Cells/LOCAL_ATTRS-org.cytoscape.model.CyNetwork-Expression+%2D+Umbilical+Vein+Endothelial+Cells+root+default++network.cytable" sourceColumn="SumInformationLoss" name="SumInformationLoss"/>
        <virtualColumn immutable="false" targetJoinKey="SUID" targetTable="670-Expression+%2D+Umbilical+Vein+Endothelial+Cells/LOCAL_ATTRS-org.cytoscape.model.CyNetwork-Expression+%2D+Umbilical+Vein+Endothelial+Cells+default++network.cytable" sourceJoinKey="SUID" sourceTable="654-Expression+%2D+Umbilical+Vein+Endothelial+Cells/LOCAL_ATTRS-org.cytoscape.model.CyNetwork-Expression+%2D+Umbilical+Vein+Endothelial+Cells+root+default++network.cytable" sourceColumn="NormalizedSumInformationLoss" name="NormalizedSumInformationLoss"/>
        <virtualColumn immutable="false" targetJoinKey="SUID" targetTable="500-Network+of+Metabolic+Flexibility+%2D+Colour+Coded+by+Pathways/LOCAL_ATTRS-org.cytoscape.model.CyNetwork-Network+of+Metabolic+Flexibility+%2D+Colour+Coded+by+Pathways+default++network.cytable" sourceJoinKey="SUID" sourceTable="484-Network+of+Metabolic+Flexibility+%2D+Colour+Coded+by+Pathways/SHARED_ATTRS-org.cytoscape.model.CyNetwork-Network+of+Metabolic+Flexibility+%2D+Colour+Coded+by+Pathways+root+shared++network.cytable" sourceColumn="shared name" name="shared name"/>
        <virtualColumn immutable="false" targetJoinKey="SUID" targetTable="500-Network+of+Metabolic+Flexibility+%2D+Colour+Coded+by+Pathways/LOCAL_ATTRS-org.cytoscape.model.CyNetwork-Network+of+Metabolic+Flexibility+%2D+Colour+Coded+by+Pathways+default++network.cytable" sourceJoinKey="SUID" sourceTable="484-Network+of+Metabolic+Flexibility+%2D+Colour+Coded+by+Pathways/LOCAL_ATTRS-org.cytoscape.model.CyNetwork-Network+of+Metabolic+Flexibility+%2D+Colour+Coded+by+Pathways+root+default++network.cytable" sourceColumn="SumInformationLoss" name="SumInformationLoss"/>
        <virtualColumn immutable="false" targetJoinKey="SUID" targetTable="500-Network+of+Metabolic+Flexibility+%2D+Colour+Coded+by+Pathways/LOCAL_ATTRS-org.cytoscape.model.CyNetwork-Network+of+Metabolic+Flexibility+%2D+Colour+Coded+by+Pathways+default++network.cytable" sourceJoinKey="SUID" sourceTable="484-Network+of+Metabolic+Flexibility+%2D+Colour+Coded+by+Pathways/LOCAL_ATTRS-org.cytoscape.model.CyNetwork-Network+of+Metabolic+Flexibility+%2D+Colour+Coded+by+Pathways+root+default++network.cytable" sourceColumn="NormalizedSumInformationLoss" name="NormalizedSumInformationLoss"/>
        <virtualColumn immutable="false" targetJoinKey="SUID" targetTable="484-Network+of+Metabolic+Flexibility+%2D+Colour+Coded+by+Pathways/LOCAL_ATTRS-org.cytoscape.model.CyNetwork-Network+of+Metabolic+Flexibility+%2D+Colour+Coded+by+Pathways+root+default++network.cytable" sourceJoinKey="SUID" sourceTable="484-Network+of+Metabolic+Flexibility+%2D+Colour+Coded+by+Pathways/SHARED_ATTRS-org.cytoscape.model.CyNetwork-Network+of+Metabolic+Flexibility+%2D+Colour+Coded+by+Pathways+root+shared++network.cytable" sourceColumn="shared name" name="shared name"/>
        <virtualColumn immutable="false" targetJoinKey="SUID" targetTable="670-Expression+%2D+Umbilical+Vein+Endothelial+Cells/LOCAL_ATTRS-org.cytoscape.model.CyNode-Expression+%2D+Umbilical+Vein+Endothelial+Cells+default++node.cytable" sourceJoinKey="SUID" sourceTable="654-Expression+%2D+Umbilical+Vein+Endothelial+Cells/SHARED_ATTRS-org.cytoscape.model.CyNode-Expression+%2D+Umbilical+Vein+Endothelial+Cells+root+shared++node.cytable" sourceColumn="shared name" name="shared name"/>
        <virtualColumn immutable="false" targetJoinKey="SUID" targetTable="670-Expression+%2D+Umbilical+Vein+Endothelial+Cells/LOCAL_ATTRS-org.cytoscape.model.CyNode-Expression+%2D+Umbilical+Vein+Endothelial+Cells+default++node.cytable" sourceJoinKey="SUID" sourceTable="654-Expression+%2D+Umbilical+Vein+Endothelial+Cells/LOCAL_ATTRS-org.cytoscape.model.CyNode-Expression+%2D+Umbilical+Vein+Endothelial+Cells+root+default++node.cytable" sourceColumn="Category" name="Category"/>
        <virtualColumn immutable="false" targetJoinKey="SUID" targetTable="670-Expression+%2D+Umbilical+Vein+Endothelial+Cells/LOCAL_ATTRS-org.cytoscape.model.CyNode-Expression+%2D+Umbilical+Vein+Endothelial+Cells+default++node.cytable" sourceJoinKey="SUID" sourceTable="654-Expression+%2D+Umbilical+Vein+Endothelial+Cells/LOCAL_ATTRS-org.cytoscape.model.CyNode-Expression+%2D+Umbilical+Vein+Endothelial+Cells+root+default++node.cytable" sourceColumn="ENSG" name="ENSG"/>
        <virtualColumn immutable="false" targetJoinKey="SUID" targetTable="670-Expression+%2D+Umbilical+Vein+Endothelial+Cells/LOCAL_ATTRS-org.cytoscape.model.CyNode-Expression+%2D+Umbilical+Vein+Endothelial+Cells+default++node.cytable" sourceJoinKey="SUID" sourceTable="654-Expression+%2D+Umbilical+Vein+Endothelial+Cells/LOCAL_ATTRS-org.cytoscape.model.CyNode-Expression+%2D+Umbilical+Vein+Endothelial+Cells+root+default++node.cytable" sourceColumn="Localisation" name="Localisation"/>
        <virtualColumn immutable="false" targetJoinKey="SUID" targetTable="670-Expression+%2D+Umbilical+Vein+Endothelial+Cells/LOCAL_ATTRS-org.cytoscape.model.CyNode-Expression+%2D+Umbilical+Vein+Endothelial+Cells+default++node.cytable" sourceJoinKey="SUID" sourceTable="654-Expression+%2D+Umbilical+Vein+Endothelial+Cells/LOCAL_ATTRS-org.cytoscape.model.CyNode-Expression+%2D+Umbilical+Vein+Endothelial+Cells+root+default++node.cytable" sourceColumn="NodeType" name="NodeType"/>
        <virtualColumn immutable="false" targetJoinKey="SUID" targetTable="670-Expression+%2D+Umbilical+Vein+Endothelial+Cells/LOCAL_ATTRS-org.cytoscape.model.CyNode-Expression+%2D+Umbilical+Vein+Endothelial+Cells+default++node.cytable" sourceJoinKey="SUID" sourceTable="654-Expression+%2D+Umbilical+Vein+Endothelial+Cells/SHARED_ATTRS-org.cytoscape.model.CyNode-Expression+%2D+Umbilical+Vein+Endothelial+Cells+root+shared++node.cytable" sourceColumn="endothelial cell of umbilical vein (proliferating)" name="endothelial cell of umbilical vein (proliferating)"/>
        <virtualColumn immutable="false" targetJoinKey="SUID" targetTable="670-Expression+%2D+Umbilical+Vein+Endothelial+Cells/LOCAL_ATTRS-org.cytoscape.model.CyNode-Expression+%2D+Umbilical+Vein+Endothelial+Cells+default++node.cytable" sourceJoinKey="SUID" sourceTable="654-Expression+%2D+Umbilical+Vein+Endothelial+Cells/SHARED_ATTRS-org.cytoscape.model.CyNode-Expression+%2D+Umbilical+Vein+Endothelial+Cells+root+shared++node.cytable" sourceColumn="endothelial cell of umbilical vein (resting)" name="endothelial cell of umbilical vein (resting)"/>
        <virtualColumn immutable="false" targetJoinKey="SUID" targetTable="670-Expression+%2D+Umbilical+Vein+Endothelial+Cells/LOCAL_ATTRS-org.cytoscape.model.CyNode-Expression+%2D+Umbilical+Vein+Endothelial+Cells+default++node.cytable" sourceJoinKey="SUID" sourceTable="654-Expression+%2D+Umbilical+Vein+Endothelial+Cells/SHARED_ATTRS-org.cytoscape.model.CyNode-Expression+%2D+Umbilical+Vein+Endothelial+Cells+root+shared++node.cytable" sourceColumn="Log2TPM (endothelial cell of umbilical vein (proliferating))" name="Log2TPM (endothelial cell of umbilical vein (proliferating))"/>
        <virtualColumn immutable="false" targetJoinKey="SUID" targetTable="670-Expression+%2D+Umbilical+Vein+Endothelial+Cells/LOCAL_ATTRS-org.cytoscape.model.CyNode-Expression+%2D+Umbilical+Vein+Endothelial+Cells+default++node.cytable" sourceJoinKey="SUID" sourceTable="654-Expression+%2D+Umbilical+Vein+Endothelial+Cells/SHARED_ATTRS-org.cytoscape.model.CyNode-Expression+%2D+Umbilical+Vein+Endothelial+Cells+root+shared++node.cytable" sourceColumn="Log2TPM (endothelial cell of umbilical vein (resting) )" name="Log2TPM (endothelial cell of umbilical vein (resting) )"/>
        <virtualColumn immutable="false" targetJoinKey="SUID" targetTable="654-Expression+%2D+Umbilical+Vein+Endothelial+Cells/LOCAL_ATTRS-org.cytoscape.model.CyNetwork-Expression+%2D+Umbilical+Vein+Endothelial+Cells+root+default++network.cytable" sourceJoinKey="SUID" sourceTable="654-Expression+%2D+Umbilical+Vein+Endothelial+Cells/SHARED_ATTRS-org.cytoscape.model.CyNetwork-Expression+%2D+Umbilical+Vein+Endothelial+Cells+root+shared++network.cytable" sourceColumn="shared name" name="shared name"/>
        <virtualColumn immutable="false" targetJoinKey="SUID" targetTable="670-Expression+%2D+Umbilical+Vein+Endothelial+Cells/LOCAL_ATTRS-org.cytoscape.model.CyEdge-Expression+%2D+Umbilical+Vein+Endothelial+Cells+default++edge.cytable" sourceJoinKey="SUID" sourceTable="654-Expression+%2D+Umbilical+Vein+Endothelial+Cells/SHARED_ATTRS-org.cytoscape.model.CyEdge-Expression+%2D+Umbilical+Vein+Endothelial+Cells+root+shared++edge.cytable" sourceColumn="shared name" name="shared name"/>
        <virtualColumn immutable="false" targetJoinKey="SUID" targetTable="670-Expression+%2D+Umbilical+Vein+Endothelial+Cells/LOCAL_ATTRS-org.cytoscape.model.CyEdge-Expression+%2D+Umbilical+Vein+Endothelial+Cells+default++edge.cytable" sourceJoinKey="SUID" sourceTable="654-Expression+%2D+Umbilical+Vein+Endothelial+Cells/SHARED_ATTRS-org.cytoscape.model.CyEdge-Expression+%2D+Umbilical+Vein+Endothelial+Cells+root+shared++edge.cytable" sourceColumn="shared interaction" name="shared interaction"/>
        <virtualColumn immutable="false" targetJoinKey="SUID" targetTable="670-Expression+%2D+Umbilical+Vein+Endothelial+Cells/LOCAL_ATTRS-org.cytoscape.model.CyEdge-Expression+%2D+Umbilical+Vein+Endothelial+Cells+default++edge.cytable" sourceJoinKey="SUID" sourceTable="654-Expression+%2D+Umbilical+Vein+Endothelial+Cells/LOCAL_ATTRS-org.cytoscape.model.CyEdge-Expression+%2D+Umbilical+Vein+Endothelial+Cells+root+default++edge.cytable" sourceColumn="abstraction" name="abstraction"/>
        <virtualColumn immutable="false" targetJoinKey="SUID" targetTable="670-Expression+%2D+Umbilical+Vein+Endothelial+Cells/LOCAL_ATTRS-org.cytoscape.model.CyEdge-Expression+%2D+Umbilical+Vein+Endothelial+Cells+default++edge.cytable" sourceJoinKey="SUID" sourceTable="654-Expression+%2D+Umbilical+Vein+Endothelial+Cells/LOCAL_ATTRS-org.cytoscape.model.CyEdge-Expression+%2D+Umbilical+Vein+Endothelial+Cells+root+default++edge.cytable" sourceColumn="event" name="event"/>
        <virtualColumn immutable="false" targetJoinKey="SUID" targetTable="484-Network+of+Metabolic+Flexibility+%2D+Colour+Coded+by+Pathways/LOCAL_ATTRS-org.cytoscape.model.CyEdge-Network+of+Metabolic+Flexibility+%2D+Colour+Coded+by+Pathways+root+default++edge.cytable" sourceJoinKey="SUID" sourceTable="484-Network+of+Metabolic+Flexibility+%2D+Colour+Coded+by+Pathways/SHARED_ATTRS-org.cytoscape.model.CyEdge-Network+of+Metabolic+Flexibility+%2D+Colour+Coded+by+Pathways+root+shared++edge.cytable" sourceColumn="shared name" name="shared name"/>
        <virtualColumn immutable="false" targetJoinKey="SUID" targetTable="484-Network+of+Metabolic+Flexibility+%2D+Colour+Coded+by+Pathways/LOCAL_ATTRS-org.cytoscape.model.CyEdge-Network+of+Metabolic+Flexibility+%2D+Colour+Coded+by+Pathways+root+default++edge.cytable" sourceJoinKey="SUID" sourceTable="484-Network+of+Metabolic+Flexibility+%2D+Colour+Coded+by+Pathways/SHARED_ATTRS-org.cytoscape.model.CyEdge-Network+of+Metabolic+Flexibility+%2D+Colour+Coded+by+Pathways+root+shared++edge.cytable" sourceColumn="shared interaction" name="shared interaction"/>
        <virtualColumn immutable="false" targetJoinKey="SUID" targetTable="484-Network+of+Metabolic+Flexibility+%2D+Colour+Coded+by+Pathways/LOCAL_ATTRS-org.cytoscape.model.CyNode-Network+of+Metabolic+Flexibility+%2D+Colour+Coded+by+Pathways+root+default++node.cytable" sourceJoinKey="SUID" sourceTable="484-Network+of+Metabolic+Flexibility+%2D+Colour+Coded+by+Pathways/SHARED_ATTRS-org.cytoscape.model.CyNode-Network+of+Metabolic+Flexibility+%2D+Colour+Coded+by+Pathways+root+shared++node.cytable" sourceColumn="shared name" name="shared name"/>
        <virtualColumn immutable="false" targetJoinKey="SUID" targetTable="654-Expression+%2D+Umbilical+Vein+Endothelial+Cells/LOCAL_ATTRS-org.cytoscape.model.CyNode-Expression+%2D+Umbilical+Vein+Endothelial+Cells+root+default++node.cytable" sourceJoinKey="SUID" sourceTable="654-Expression+%2D+Umbilical+Vein+Endothelial+Cells/SHARED_ATTRS-org.cytoscape.model.CyNode-Expression+%2D+Umbilical+Vein+Endothelial+Cells+root+shared++node.cytable" sourceColumn="shared name" name="shared name"/>
        <virtualColumn immutable="false" targetJoinKey="SUID" targetTable="654-Expression+%2D+Umbilical+Vein+Endothelial+Cells/LOCAL_ATTRS-org.cytoscape.model.CyNode-Expression+%2D+Umbilical+Vein+Endothelial+Cells+root+default++node.cytable" sourceJoinKey="SUID" sourceTable="654-Expression+%2D+Umbilical+Vein+Endothelial+Cells/SHARED_ATTRS-org.cytoscape.model.CyNode-Expression+%2D+Umbilical+Vein+Endothelial+Cells+root+shared++node.cytable" sourceColumn="endothelial cell of umbilical vein (proliferating)" name="endothelial cell of umbilical vein (proliferating)"/>
        <virtualColumn immutable="false" targetJoinKey="SUID" targetTable="654-Expression+%2D+Umbilical+Vein+Endothelial+Cells/LOCAL_ATTRS-org.cytoscape.model.CyNode-Expression+%2D+Umbilical+Vein+Endothelial+Cells+root+default++node.cytable" sourceJoinKey="SUID" sourceTable="654-Expression+%2D+Umbilical+Vein+Endothelial+Cells/SHARED_ATTRS-org.cytoscape.model.CyNode-Expression+%2D+Umbilical+Vein+Endothelial+Cells+root+shared++node.cytable" sourceColumn="endothelial cell of umbilical vein (resting)" name="endothelial cell of umbilical vein (resting)"/>
        <virtualColumn immutable="false" targetJoinKey="SUID" targetTable="654-Expression+%2D+Umbilical+Vein+Endothelial+Cells/LOCAL_ATTRS-org.cytoscape.model.CyNode-Expression+%2D+Umbilical+Vein+Endothelial+Cells+root+default++node.cytable" sourceJoinKey="SUID" sourceTable="654-Expression+%2D+Umbilical+Vein+Endothelial+Cells/SHARED_ATTRS-org.cytoscape.model.CyNode-Expression+%2D+Umbilical+Vein+Endothelial+Cells+root+shared++node.cytable" sourceColumn="Log2TPM (endothelial cell of umbilical vein (proliferating))" name="Log2TPM (endothelial cell of umbilical vein (proliferating))"/>
        <virtualColumn immutable="false" targetJoinKey="SUID" targetTable="654-Expression+%2D+Umbilical+Vein+Endothelial+Cells/LOCAL_ATTRS-org.cytoscape.model.CyNode-Expression+%2D+Umbilical+Vein+Endothelial+Cells+root+default++node.cytable" sourceJoinKey="SUID" sourceTable="654-Expression+%2D+Umbilical+Vein+Endothelial+Cells/SHARED_ATTRS-org.cytoscape.model.CyNode-Expression+%2D+Umbilical+Vein+Endothelial+Cells+root+shared++node.cytable" sourceColumn="Log2TPM (endothelial cell of umbilical vein (resting) )" name="Log2TPM (endothelial cell of umbilical vein (resting) )"/>
        <virtualColumn immutable="false" targetJoinKey="SUID" targetTable="500-Network+of+Metabolic+Flexibility+%2D+Colour+Coded+by+Pathways/LOCAL_ATTRS-org.cytoscape.model.CyNode-Network+of+Metabolic+Flexibility+%2D+Colour+Coded+by+Pathways+default++node.cytable" sourceJoinKey="SUID" sourceTable="484-Network+of+Metabolic+Flexibility+%2D+Colour+Coded+by+Pathways/SHARED_ATTRS-org.cytoscape.model.CyNode-Network+of+Metabolic+Flexibility+%2D+Colour+Coded+by+Pathways+root+shared++node.cytable" sourceColumn="shared name" name="shared name"/>
        <virtualColumn immutable="false" targetJoinKey="SUID" targetTable="500-Network+of+Metabolic+Flexibility+%2D+Colour+Coded+by+Pathways/LOCAL_ATTRS-org.cytoscape.model.CyNode-Network+of+Metabolic+Flexibility+%2D+Colour+Coded+by+Pathways+default++node.cytable" sourceJoinKey="SUID" sourceTable="484-Network+of+Metabolic+Flexibility+%2D+Colour+Coded+by+Pathways/LOCAL_ATTRS-org.cytoscape.model.CyNode-Network+of+Metabolic+Flexibility+%2D+Colour+Coded+by+Pathways+root+default++node.cytable" sourceColumn="Category" name="Category"/>
        <virtualColumn immutable="false" targetJoinKey="SUID" targetTable="500-Network+of+Metabolic+Flexibility+%2D+Colour+Coded+by+Pathways/LOCAL_ATTRS-org.cytoscape.model.CyNode-Network+of+Metabolic+Flexibility+%2D+Colour+Coded+by+Pathways+default++node.cytable" sourceJoinKey="SUID" sourceTable="484-Network+of+Metabolic+Flexibility+%2D+Colour+Coded+by+Pathways/LOCAL_ATTRS-org.cytoscape.model.CyNode-Network+of+Metabolic+Flexibility+%2D+Colour+Coded+by+Pathways+root+default++node.cytable" sourceColumn="ENSG" name="ENSG"/>
        <virtualColumn immutable="false" targetJoinKey="SUID" targetTable="500-Network+of+Metabolic+Flexibility+%2D+Colour+Coded+by+Pathways/LOCAL_ATTRS-org.cytoscape.model.CyNode-Network+of+Metabolic+Flexibility+%2D+Colour+Coded+by+Pathways+default++node.cytable" sourceJoinKey="SUID" sourceTable="484-Network+of+Metabolic+Flexibility+%2D+Colour+Coded+by+Pathways/LOCAL_ATTRS-org.cytoscape.model.CyNode-Network+of+Metabolic+Flexibility+%2D+Colour+Coded+by+Pathways+root+default++node.cytable" sourceColumn="Localisation" name="Localisation"/>
        <virtualColumn immutable="false" targetJoinKey="SUID" targetTable="500-Network+of+Metabolic+Flexibility+%2D+Colour+Coded+by+Pathways/LOCAL_ATTRS-org.cytoscape.model.CyNode-Network+of+Metabolic+Flexibility+%2D+Colour+Coded+by+Pathways+default++node.cytable" sourceJoinKey="SUID" sourceTable="484-Network+of+Metabolic+Flexibility+%2D+Colour+Coded+by+Pathways/LOCAL_ATTRS-org.cytoscape.model.CyNode-Network+of+Metabolic+Flexibility+%2D+Colour+Coded+by+Pathways+root+default++node.cytable" sourceColumn="NodeType" name="NodeType"/>
        <virtualColumn immutable="false" targetJoinKey="SUID" targetTable="500-Network+of+Metabolic+Flexibility+%2D+Colour+Coded+by+Pathways/LOCAL_ATTRS-org.cytoscape.model.CyEdge-Network+of+Metabolic+Flexibility+%2D+Colour+Coded+by+Pathways+default++edge.cytable" sourceJoinKey="SUID" sourceTable="484-Network+of+Metabolic+Flexibility+%2D+Colour+Coded+by+Pathways/SHARED_ATTRS-org.cytoscape.model.CyEdge-Network+of+Metabolic+Flexibility+%2D+Colour+Coded+by+Pathways+root+shared++edge.cytable" sourceColumn="shared name" name="shared name"/>
        <virtualColumn immutable="false" targetJoinKey="SUID" targetTable="500-Network+of+Metabolic+Flexibility+%2D+Colour+Coded+by+Pathways/LOCAL_ATTRS-org.cytoscape.model.CyEdge-Network+of+Metabolic+Flexibility+%2D+Colour+Coded+by+Pathways+default++edge.cytable" sourceJoinKey="SUID" sourceTable="484-Network+of+Metabolic+Flexibility+%2D+Colour+Coded+by+Pathways/SHARED_ATTRS-org.cytoscape.model.CyEdge-Network+of+Metabolic+Flexibility+%2D+Colour+Coded+by+Pathways+root+shared++edge.cytable" sourceColumn="shared interaction" name="shared interaction"/>
        <virtualColumn immutable="false" targetJoinKey="SUID" targetTable="500-Network+of+Metabolic+Flexibility+%2D+Colour+Coded+by+Pathways/LOCAL_ATTRS-org.cytoscape.model.CyEdge-Network+of+Metabolic+Flexibility+%2D+Colour+Coded+by+Pathways+default++edge.cytable" sourceJoinKey="SUID" sourceTable="484-Network+of+Metabolic+Flexibility+%2D+Colour+Coded+by+Pathways/LOCAL_ATTRS-org.cytoscape.model.CyEdge-Network+of+Metabolic+Flexibility+%2D+Colour+Coded+by+Pathways+root+default++edge.cytable" sourceColumn="abstraction" name="abstraction"/>
        <virtualColumn immutable="false" targetJoinKey="SUID" targetTable="500-Network+of+Metabolic+Flexibility+%2D+Colour+Coded+by+Pathways/LOCAL_ATTRS-org.cytoscape.model.CyEdge-Network+of+Metabolic+Flexibility+%2D+Colour+Coded+by+Pathways+default++edge.cytable" sourceJoinKey="SUID" sourceTable="484-Network+of+Metabolic+Flexibility+%2D+Colour+Coded+by+Pathways/LOCAL_ATTRS-org.cytoscape.model.CyEdge-Network+of+Metabolic+Flexibility+%2D+Colour+Coded+by+Pathways+root+default++edge.cytable" sourceColumn="event" name="event"/>
    </virtualColumns>
</cyTables>
