# Supplementary material
Source: publisher figshare collection journal article supplement (https://springernature.figshare.com/ndownloader/files/17562839)
Supplement: Supplementary file 1 [file 17562839 › CytoscapeSession-2018_09_26-18_42/views/500-1049-Network+of+Metabolic+Flexibility+%2D+Colour+Coded+by+Pathways.xgmml]

<?xml version="1.0" encoding="UTF-8" standalone="yes"?>
<graph id="1049" label="Network of Metabolic Flexibility - Colour Coded by Pathways" cy:view="1" cy:networkId="500" cy:visualStyle="MetFlex" cy:rendererId="org.cytoscape.ding" cy:documentVersion="3.0" xmlns:dc="http://purl.org/dc/elements/1.1/" xmlns:xlink="http://www.w3.org/1999/xlink" xmlns:rdf="http://www.w3.org/1999/02/22-rdf-syntax-ns#" xmlns:cy="http://www.cytoscape.org" xmlns="http://www.cs.rpi.edu/XGMML">
  <graphics>
    <att name="NETWORK_CENTER_X_LOCATION" value="847.9994850158691" type="string" cy:type="String"/>
    <att name="NETWORK_CENTER_Y_LOCATION" value="515.171875" type="string" cy:type="String"/>
    <att name="NETWORK_NODE_SELECTION" value="true" type="string" cy:type="String"/>
    <att name="NETWORK_DEPTH" value="0.0" type="string" cy:type="String"/>
    <att name="NETWORK_SCALE_FACTOR" value="0.4510632296451711" type="string" cy:type="String"/>
    <att name="NETWORK_HEIGHT" value="648.0" type="string" cy:type="String"/>
    <att name="NETWORK_WIDTH" value="1513.0" type="string" cy:type="String"/>
    <att name="NETWORK_TITLE" value="Network of Metabolic Flexibility - Colour Coded by Pathways" type="string" cy:type="String"/>
    <att name="NETWORK_EDGE_SELECTION" value="true" type="string" cy:type="String"/>
    <att name="NETWORK_CENTER_Z_LOCATION" value="0.0" type="string" cy:type="String"/>
  </graphics>
  <node id="1113" label="Pyruvate" cy:nodeId="510">
    <graphics y="905.9798583984375" z="0.0" x="867.084228515625"/>
  </node>
  <node id="1112" label="MPC2" cy:nodeId="511">
    <graphics y="1013.0" z="0.0" x="693.4899291992188"/>
  </node>
  <node id="1111" label="MPC1" cy:nodeId="512">
    <graphics y="803.0" z="0.0" x="693.4899291992188"/>
  </node>
  <node id="1110" label="Pyruvate Transport" cy:nodeId="513">
    <graphics y="905.9798583984375" z="0.0" x="693.4899291992188"/>
  </node>
  <node id="1109" label="Acyl-CoA" cy:nodeId="514">
    <graphics y="228.8543701171875" z="0.0" x="867.084228515625"/>
  </node>
  <node id="1108" label="Acyl Transport" cy:nodeId="515">
    <graphics y="228.85435485839844" z="0.0" x="693.4899291992188"/>
  </node>
  <node id="1107" label="CPT1A" cy:nodeId="516">
    <graphics y="326.25482177734375" z="0.0" x="693.4899291992188"/>
  </node>
  <node id="1106" label="CPT2" cy:nodeId="517">
    <graphics y="129.60658264160156" z="0.0" x="693.4899291992188"/>
  </node>
  <node id="1105" label="PDHX" cy:nodeId="518">
    <graphics y="1047.2445068359375" z="0.0" x="280.54576229173307"/>
  </node>
  <node id="1104" label="SCD" cy:nodeId="519">
    <graphics y="515.5150146484375" z="0.0" x="1408.366455078125"/>
  </node>
  <node id="1103" label="Acetyl-CoA Synthesis" cy:nodeId="520">
    <graphics y="626.7785034179688" z="0.0" x="1137.084228515625"/>
  </node>
  <node id="1102" label="ACLY" cy:nodeId="521">
    <graphics y="739.4697265625" z="0.0" x="1137.084228515625"/>
  </node>
  <node id="1101" label="PDK1" cy:nodeId="522">
    <graphics y="950.9798583984375" z="0.0" x="78.05690002441406"/>
  </node>
  <node id="1100" label="PDK2" cy:nodeId="523">
    <graphics y="912.429443359375" z="0.0" x="119.66973876953125"/>
  </node>
  <node id="1099" label="PDK3" cy:nodeId="524">
    <graphics y="875.5692138671875" z="0.0" x="163.74905395507812"/>
  </node>
  <node id="1098" label="PRKAG3" cy:nodeId="525">
    <graphics y="-83.4813232421875" z="0.0" x="1029.754638671875"/>
  </node>
  <node id="1097" label="PRKAG2" cy:nodeId="526">
    <graphics y="-83.4813232421875" z="0.0" x="1137.084228515625"/>
  </node>
  <node id="1096" label="PRKAG1" cy:nodeId="527">
    <graphics y="-83.4813232421875" z="0.0" x="1244.1221923828125"/>
  </node>
  <node id="1095" label="PRKAB2" cy:nodeId="528">
    <graphics y="120.01327514648438" z="0.0" x="1217.414794921875"/>
  </node>
  <node id="1094" label="PRKAB1" cy:nodeId="529">
    <graphics y="120.01327514648438" z="0.0" x="1313.7362060546875"/>
  </node>
  <node id="1093" label="PRKAA2" cy:nodeId="530">
    <graphics y="67.60464477539062" z="0.0" x="1313.7362060546875"/>
  </node>
  <node id="1092" label="PRKAA1" cy:nodeId="531">
    <graphics y="13.857009887695312" z="0.0" x="1313.7362060546875"/>
  </node>
  <node id="1091" label="PPARG" cy:nodeId="532">
    <graphics y="-83.4813232421875" z="0.0" x="747.084228515625"/>
  </node>
  <node id="1090" label="PDK4" cy:nodeId="533">
    <graphics y="834.8543701171875" z="0.0" x="204.43634033203125"/>
  </node>
  <node id="1089" label="AMPK" cy:nodeId="534">
    <graphics y="22.719207763671875" z="0.0" x="1137.084228515625"/>
  </node>
  <node id="1088" label="ACACA" cy:nodeId="535">
    <graphics y="417.11309814453125" z="0.0" x="992.262939453125"/>
  </node>
  <node id="1087" label="Malonyl-CoA" cy:nodeId="536">
    <graphics y="326.25482177734375" z="0.0" x="1137.084228515625"/>
  </node>
  <node id="1086" label="Carboxylation" cy:nodeId="537">
    <graphics y="417.11309814453125" z="0.0" x="1137.084228515625"/>
  </node>
  <node id="1085" label="FASN" cy:nodeId="538">
    <graphics y="515.5150146484375" z="0.0" x="1313.7362060546875"/>
  </node>
  <node id="1084" label="Fatty Acid Synthesis" cy:nodeId="539">
    <graphics y="417.11309814453125" z="0.0" x="1313.7362060546875"/>
  </node>
  <node id="1083" label="Acetyl-CoA" cy:nodeId="540">
    <graphics y="515.5150146484375" z="0.0" x="1137.084228515625"/>
  </node>
  <node id="1082" label="Fatty Acid Degradation" cy:nodeId="541">
    <graphics y="228.85435485839844" z="0.0" x="1137.084228515625"/>
  </node>
  <node id="1081" label="Fatty Acids" cy:nodeId="542">
    <graphics y="228.8543701171875" z="0.0" x="1313.7362060546875"/>
  </node>
  <node id="1080" label="CD36" cy:nodeId="543">
    <graphics y="115.43896484375" z="0.0" x="1518.2330322265625"/>
  </node>
  <node id="1079" label="Fatty Acid Uptake" cy:nodeId="544">
    <graphics y="228.8543701171875" z="0.0" x="1518.2330322265625"/>
  </node>
  <node id="1078" label="Fatty Acids" cy:nodeId="545">
    <graphics y="227.33828735351562" z="0.0" x="1703.96533203125"/>
  </node>
  <node id="1077" label="Citrate" cy:nodeId="546">
    <graphics y="627.88720703125" z="0.0" x="867.084228515625"/>
  </node>
  <node id="1076" label="SLC25A1" cy:nodeId="547">
    <graphics y="515.740234375" z="0.0" x="693.4899291992188"/>
  </node>
  <node id="1075" label="Citrate Transport" cy:nodeId="548">
    <graphics y="626.7785034179688" z="0.0" x="693.4899291992188"/>
  </node>
  <node id="1074" label="ATP" cy:nodeId="549">
    <graphics y="739.4697265625" z="0.0" x="123.05690002441406"/>
  </node>
  <node id="1073" label="AMP" cy:nodeId="550">
    <graphics y="22.719207763671875" z="0.0" x="123.05690002441406"/>
  </node>
  <node id="1072" label="NADH" cy:nodeId="551">
    <graphics y="739.4697265625" z="0.0" x="44.163543701171875"/>
  </node>
  <node id="1071" label="NAD+" cy:nodeId="552">
    <graphics y="626.7785034179688" z="0.0" x="-7.966361999511719"/>
  </node>
  <node id="1070" label="TCA Cycle" cy:nodeId="553">
    <graphics y="626.7785034179688" z="0.0" x="123.05690002441406"/>
  </node>
  <node id="1069" label="Citrate" cy:nodeId="554">
    <graphics y="626.7785034179688" z="0.0" x="379.1013488769531"/>
  </node>
  <node id="1068" label="Acetyl-CoA" cy:nodeId="555">
    <graphics y="739.4697265625" z="0.0" x="378.25347900390625"/>
  </node>
  <node id="1067" label="PDC" cy:nodeId="556">
    <graphics y="1017.2445068359375" z="0.0" x="377.8993835449219"/>
  </node>
  <node id="1066" label="Decarboxylation" cy:nodeId="557">
    <graphics y="830.9798583984375" z="0.0" x="379.4412536621094"/>
  </node>
  <node id="1065" label="Pyruvate" cy:nodeId="558">
    <graphics y="905.9798583984375" z="0.0" x="501.2752685546875"/>
  </node>
  <node id="1064" label="PFK1" cy:nodeId="559">
    <graphics y="1009.4669189453125" z="0.0" x="1137.084228515625"/>
  </node>
  <node id="1063" label="Glycolysis" cy:nodeId="560">
    <graphics y="905.9798583984375" z="0.0" x="1137.084228515625"/>
  </node>
  <node id="1062" label="Glucose" cy:nodeId="561">
    <graphics y="905.9798583984375" z="0.0" x="1313.7362060546875"/>
  </node>
  <node id="1061" label="SLC2A1" cy:nodeId="562">
    <graphics y="1013.0" z="0.0" x="1518.2330322265625"/>
  </node>
  <node id="1060" label="SLC2A4" cy:nodeId="563">
    <graphics y="803.0" z="0.0" x="1518.2330322265625"/>
  </node>
  <node id="1059" label="Glucose Uptake" cy:nodeId="564">
    <graphics y="905.9798583984375" z="0.0" x="1518.2330322265625"/>
  </node>
  <node id="1058" label="Glucose" cy:nodeId="565">
    <graphics y="904.4637451171875" z="0.0" x="1703.96533203125"/>
  </node>
  <node id="1057" label="PFKL" cy:nodeId="566">
    <graphics y="1009.4669189453125" z="0.0" x="1037.2630004882812"/>
  </node>
  <node id="1056" label="PFKM" cy:nodeId="567">
    <graphics y="1112.2264404296875" z="0.0" x="1137.084228515625"/>
  </node>
  <node id="1055" label="PFKP" cy:nodeId="568">
    <graphics y="1009.4669189453125" z="0.0" x="1234.125"/>
  </node>
  <node id="1054" label="PDHA1" cy:nodeId="569">
    <graphics y="1113.8250732421875" z="0.0" x="408.339599609375"/>
  </node>
  <node id="1053" label="PDHB" cy:nodeId="570">
    <graphics y="1107.13623046875" z="0.0" x="321.5494079589844"/>
  </node>
  <node id="1052" label="DLAT" cy:nodeId="571">
    <graphics y="1064.2486572265625" z="0.0" x="479.899169921875"/>
  </node>
  <node id="1051" label="DLD" cy:nodeId="572">
    <graphics y="989.6795654296875" z="0.0" x="477.257080078125"/>
  </node>
</graph>
