# Supplementary material
Source: publisher figshare collection journal article supplement (https://springernature.figshare.com/ndownloader/files/17562839)
Supplement: Supplementary file 1 [file 17562839 › CytoscapeSession-2018_09_26-18_42/views/670-1341-Expression+%2D+Umbilical+Vein+Endothelial+Cells.xgmml]

<?xml version="1.0" encoding="UTF-8" standalone="yes"?>
<graph id="1341" label="Expression - Umbilical Vein Endothelial Cells" cy:view="1" cy:networkId="670" cy:visualStyle="MetFlexExprs" cy:rendererId="org.cytoscape.ding" cy:documentVersion="3.0" xmlns:dc="http://purl.org/dc/elements/1.1/" xmlns:xlink="http://www.w3.org/1999/xlink" xmlns:rdf="http://www.w3.org/1999/02/22-rdf-syntax-ns#" xmlns:cy="http://www.cytoscape.org" xmlns="http://www.cs.rpi.edu/XGMML">
  <graphics>
    <att name="NETWORK_CENTER_X_LOCATION" value="847.9994850158691" type="string" cy:type="String"/>
    <att name="NETWORK_CENTER_Y_LOCATION" value="515.171875" type="string" cy:type="String"/>
    <att name="NETWORK_NODE_SELECTION" value="true" type="string" cy:type="String"/>
    <att name="NETWORK_DEPTH" value="0.0" type="string" cy:type="String"/>
    <att name="NETWORK_SCALE_FACTOR" value="0.4510632296451711" type="string" cy:type="String"/>
    <att name="NETWORK_HEIGHT" value="648.0" type="string" cy:type="String"/>
    <att name="NETWORK_WIDTH" value="1513.0" type="string" cy:type="String"/>
    <att name="NETWORK_TITLE" value="Expression - Umbilical Vein Endothelial Cells" type="string" cy:type="String"/>
    <att name="NETWORK_EDGE_SELECTION" value="true" type="string" cy:type="String"/>
    <att name="NETWORK_CENTER_Z_LOCATION" value="0.0" type="string" cy:type="String"/>
  </graphics>
  <node id="1407" label="DLD" cy:nodeId="680">
    <graphics y="989.6795654296875" z="0.0" x="477.257080078125"/>
  </node>
  <node id="1406" label="DLAT" cy:nodeId="681">
    <graphics y="1064.2486572265625" z="0.0" x="479.899169921875"/>
  </node>
  <node id="1405" label="PDHB" cy:nodeId="682">
    <graphics y="1107.13623046875" z="0.0" x="321.5494079589844"/>
  </node>
  <node id="1404" label="PDHA1" cy:nodeId="683">
    <graphics y="1113.8250732421875" z="0.0" x="408.339599609375"/>
  </node>
  <node id="1403" label="PFKP" cy:nodeId="684">
    <graphics y="1009.4669189453125" z="0.0" x="1234.125"/>
  </node>
  <node id="1402" label="PFKM" cy:nodeId="685">
    <graphics y="1112.2264404296875" z="0.0" x="1137.084228515625"/>
  </node>
  <node id="1401" label="PFKL" cy:nodeId="686">
    <graphics y="1009.4669189453125" z="0.0" x="1037.2630004882812"/>
  </node>
  <node id="1400" label="Glucose" cy:nodeId="687">
    <graphics y="904.4637451171875" z="0.0" x="1703.96533203125"/>
  </node>
  <node id="1399" label="Glucose Uptake" cy:nodeId="688">
    <graphics y="905.9798583984375" z="0.0" x="1518.2330322265625"/>
  </node>
  <node id="1398" label="SLC2A4" cy:nodeId="689">
    <graphics y="803.2659301757812" z="0.0" x="1423.2330322265625"/>
  </node>
  <node id="1397" label="SLC2A1" cy:nodeId="690">
    <graphics y="1013.0" z="0.0" x="1423.2330322265625"/>
  </node>
  <node id="1396" label="Glucose" cy:nodeId="691">
    <graphics y="905.9798583984375" z="0.0" x="1313.7362060546875"/>
  </node>
  <node id="1395" label="Glycolysis" cy:nodeId="692">
    <graphics y="905.9798583984375" z="0.0" x="1137.084228515625"/>
  </node>
  <node id="1394" label="PFK1" cy:nodeId="693">
    <graphics y="1009.4669189453125" z="0.0" x="1137.084228515625"/>
  </node>
  <node id="1393" label="Pyruvate" cy:nodeId="694">
    <graphics y="905.9798583984375" z="0.0" x="501.2752685546875"/>
  </node>
  <node id="1392" label="Decarboxylation" cy:nodeId="695">
    <graphics y="830.9798583984375" z="0.0" x="379.4412536621094"/>
  </node>
  <node id="1391" label="PDC" cy:nodeId="696">
    <graphics y="1017.2445068359375" z="0.0" x="377.8993835449219"/>
  </node>
  <node id="1390" label="Acetyl-CoA" cy:nodeId="697">
    <graphics y="739.4697265625" z="0.0" x="378.25347900390625"/>
  </node>
  <node id="1389" label="Citrate" cy:nodeId="698">
    <graphics y="626.7785034179688" z="0.0" x="379.1013488769531"/>
  </node>
  <node id="1388" label="TCA Cycle" cy:nodeId="699">
    <graphics y="626.7785034179688" z="0.0" x="123.05690002441406"/>
  </node>
  <node id="1387" label="NAD+" cy:nodeId="700">
    <graphics y="626.7785034179688" z="0.0" x="-7.966361999511719"/>
  </node>
  <node id="1386" label="NADH" cy:nodeId="701">
    <graphics y="739.4697265625" z="0.0" x="44.163543701171875"/>
  </node>
  <node id="1385" label="AMP" cy:nodeId="702">
    <graphics y="22.719207763671875" z="0.0" x="123.05690002441406"/>
  </node>
  <node id="1384" label="ATP" cy:nodeId="703">
    <graphics y="739.4697265625" z="0.0" x="123.05690002441406"/>
  </node>
  <node id="1383" label="Citrate Transport" cy:nodeId="704">
    <graphics y="626.7785034179688" z="0.0" x="693.4899291992188"/>
  </node>
  <node id="1382" label="SLC25A1" cy:nodeId="705">
    <graphics y="515.740234375" z="0.0" x="693.4899291992188"/>
  </node>
  <node id="1381" label="Citrate" cy:nodeId="706">
    <graphics y="627.88720703125" z="0.0" x="867.084228515625"/>
  </node>
  <node id="1380" label="Fatty Acids" cy:nodeId="707">
    <graphics y="227.33828735351562" z="0.0" x="1703.96533203125"/>
  </node>
  <node id="1379" label="Fatty Acid Uptake" cy:nodeId="708">
    <graphics y="228.8543701171875" z="0.0" x="1518.2330322265625"/>
  </node>
  <node id="1378" label="CD36" cy:nodeId="709">
    <graphics y="115.43896484375" z="0.0" x="1518.2330322265625"/>
  </node>
  <node id="1377" label="Fatty Acids" cy:nodeId="710">
    <graphics y="228.8543701171875" z="0.0" x="1313.7362060546875"/>
  </node>
  <node id="1376" label="Fatty Acid Degradation" cy:nodeId="711">
    <graphics y="228.85435485839844" z="0.0" x="1137.084228515625"/>
  </node>
  <node id="1375" label="Acetyl-CoA" cy:nodeId="712">
    <graphics y="515.5150146484375" z="0.0" x="1137.084228515625"/>
  </node>
  <node id="1374" label="Fatty Acid Synthesis" cy:nodeId="713">
    <graphics y="417.11309814453125" z="0.0" x="1313.7362060546875"/>
  </node>
  <node id="1373" label="FASN" cy:nodeId="714">
    <graphics y="515.5150146484375" z="0.0" x="1313.7362060546875"/>
  </node>
  <node id="1372" label="Carboxylation" cy:nodeId="715">
    <graphics y="417.11309814453125" z="0.0" x="1137.084228515625"/>
  </node>
  <node id="1371" label="Malonyl-CoA" cy:nodeId="716">
    <graphics y="325.25482177734375" z="0.0" x="1137.084228515625"/>
  </node>
  <node id="1370" label="ACACA" cy:nodeId="717">
    <graphics y="417.11309814453125" z="0.0" x="992.262939453125"/>
  </node>
  <node id="1369" label="AMPK" cy:nodeId="718">
    <graphics y="22.719207763671875" z="0.0" x="1137.084228515625"/>
  </node>
  <node id="1368" label="PDK4" cy:nodeId="719">
    <graphics y="834.8543701171875" z="0.0" x="204.43634033203125"/>
  </node>
  <node id="1367" label="PPARG" cy:nodeId="720">
    <graphics y="-83.4813232421875" z="0.0" x="747.084228515625"/>
  </node>
  <node id="1366" label="PRKAA1" cy:nodeId="721">
    <graphics y="13.857009887695312" z="0.0" x="1313.7362060546875"/>
  </node>
  <node id="1365" label="PRKAA2" cy:nodeId="722">
    <graphics y="67.60464477539062" z="0.0" x="1313.7362060546875"/>
  </node>
  <node id="1364" label="PRKAB1" cy:nodeId="723">
    <graphics y="120.01327514648438" z="0.0" x="1313.7362060546875"/>
  </node>
  <node id="1363" label="PRKAB2" cy:nodeId="724">
    <graphics y="120.01327514648438" z="0.0" x="1217.414794921875"/>
  </node>
  <node id="1362" label="PRKAG1" cy:nodeId="725">
    <graphics y="-83.4813232421875" z="0.0" x="1244.1221923828125"/>
  </node>
  <node id="1361" label="PRKAG2" cy:nodeId="726">
    <graphics y="-83.4813232421875" z="0.0" x="1137.084228515625"/>
  </node>
  <node id="1360" label="PRKAG3" cy:nodeId="727">
    <graphics y="-83.4813232421875" z="0.0" x="1029.754638671875"/>
  </node>
  <node id="1359" label="PDK3" cy:nodeId="728">
    <graphics y="875.5692138671875" z="0.0" x="163.74905395507812"/>
  </node>
  <node id="1358" label="PDK2" cy:nodeId="729">
    <graphics y="912.429443359375" z="0.0" x="119.66973876953125"/>
  </node>
  <node id="1357" label="PDK1" cy:nodeId="730">
    <graphics y="950.9798583984375" z="0.0" x="78.05690002441406"/>
  </node>
  <node id="1356" label="ACLY" cy:nodeId="731">
    <graphics y="739.4697265625" z="0.0" x="1137.084228515625"/>
  </node>
  <node id="1355" label="Acetyl-CoA Synthesis" cy:nodeId="732">
    <graphics y="626.7785034179688" z="0.0" x="1137.084228515625"/>
  </node>
  <node id="1354" label="SCD" cy:nodeId="733">
    <graphics y="515.5150146484375" z="0.0" x="1408.366455078125"/>
  </node>
  <node id="1353" label="PDHX" cy:nodeId="734">
    <graphics y="1047.2445068359375" z="0.0" x="280.54576229173307"/>
  </node>
  <node id="1352" label="CPT2" cy:nodeId="735">
    <graphics y="119.69598388671875" z="0.0" x="693.4899291992188"/>
  </node>
  <node id="1351" label="CPT1A" cy:nodeId="736">
    <graphics y="325.25482177734375" z="0.0" x="693.4899291992188"/>
  </node>
  <node id="1350" label="Acyl Transport" cy:nodeId="737">
    <graphics y="228.85435485839844" z="0.0" x="693.4899291992188"/>
  </node>
  <node id="1349" label="Acyl-CoA" cy:nodeId="738">
    <graphics y="228.8543701171875" z="0.0" x="867.084228515625"/>
  </node>
  <node id="1348" label="Pyruvate Transport" cy:nodeId="739">
    <graphics y="905.9798583984375" z="0.0" x="693.4899291992188"/>
  </node>
  <node id="1347" label="MPC1" cy:nodeId="740">
    <graphics y="803.0" z="0.0" x="693.4899291992188"/>
  </node>
  <node id="1346" label="MPC2" cy:nodeId="741">
    <graphics y="1013.0" z="0.0" x="693.4899291992188"/>
  </node>
  <node id="1345" label="Pyruvate" cy:nodeId="742">
    <graphics y="905.9798583984375" z="0.0" x="867.084228515625"/>
  </node>
  <node id="1344" label="SLC2A2" cy:nodeId="743">
    <graphics y="1013.0" z="0.0" x="1518.2330322265625"/>
  </node>
  <node id="1343" label="SLC2A3" cy:nodeId="744">
    <graphics y="803.2659301757812" z="0.0" x="1518.2330322265625"/>
  </node>
</graph>
