# Supplementary material
Source: publisher figshare collection journal article supplement (https://springernature.figshare.com/ndownloader/files/17562839)

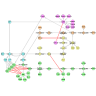

Supplement: Supplementary file 1 [file 17562839 › CytoscapeSession-2018_09_26-18_42/session_thumbnail.png]
